# Supplementary material for: Trait–fitness associations do not predict within-species phenotypic evolution over 2 million years
Source: Proc Biol Sci. 2021 Jan 20;288(1943):20202047. doi: 10.1098/rspb.2020.2047 (PMC7893266; doi:10.1098/rspb.2020.2047)
Supplement: Antarctothoa Dataset [file rspb20202047supp3.xlsx]

## Sheet: Life_history_traits_counts 1
Formation_name	Trait_section_ID	Sample_ID	Shell_ID	INT_EXT	Image_ID	Colony_ID	N_zooids	N_autozooids	N_ovicells	N_female_non_ovicellate	N_males	Ancestrula	Date	Person	Notes	Area_mm2	Empy_Area_mm2	Person	Notes
Shakespeare Cliff Basal Sand Shellbed	1	9.34	2	EXT	SCBSSB_9.34_#2E_Col_4_a	4	26	24	0	0	2	0	23.01.2019	EDM		4.9152	2.607	EDM
Shakespeare Cliff Basal Sand Shellbed	2	9.34	3	EXT	SCBSSB_9.34_#3E_Col_13_a	13	43	27	7	0	9	0	23.01.2019	EDM	annotated image available	4.9152	1.275	EDM
Shakespeare Cliff Basal Sand Shellbed	3	9.34	3	EXT	SCBSSB_9.34_#3E_Col_10_b	10	55	34	15	0	6	0	23.01.2019	EDM	annotated image available	4.9152	0.677	EDM
Shakespeare Cliff Basal Sand Shellbed	4	9.34	3	EXT	SCBSSB_9.34_#3E_Col_10_a	10	61	35	16	0	10	0	23.01.2019	EDM	annotated image available	4.9152	0.215	LHL	EDM corrected
Shakespeare Cliff Basal Sand Shellbed	5	9.34	2	INT	SCBSSB_9.34_#2I_Col_6_a	6	35	26	7	0	2	0	23.01.2019	EDM	annotated image available	4.9152	2.486	EDM
Shakespeare Cliff Basal Sand Shellbed	6	9.34	2	INT	SCBSSB_9.34_#2I_Col_5_a	5	42	31	5	0	6	0	23.01.2019	EDM	annotated image available	4.9152	1.274	LHL	EDM corrected
Shakespeare Cliff Basal Sand Shellbed	7	9.34	2	EXT	SCBSSB_9.34_#2E_Col_1_a	1	32	32	0	0	0	0	23.01.2019	EDM		4.9152	2.471	EDM
Shakespeare Cliff Basal Sand Shellbed	8	9.34	2	EXT	SCBSSB_9.34_#2E_Col_2_a	2	57	38	8	3	8	0	23.01.2019	EDM	annotated image available	4.9152	0.868	EDM
Shakespeare Cliff Basal Sand Shellbed	9	9.34	2	EXT	SCBSSB_9.34_#2E_Col_2_b	2	53	40	11	0	2	0	23.01.2019	EDM	annotated image available	4.9152	1.1	EDM
Shakespeare Cliff Basal Sand Shellbed	10	9.34	2	EXT	SCBSSB_9.34_#2E_Col_6_a	6	32	22	8	0	2	0	23.01.2019	EDM	annotated image available	4.9152	2.202	LHL	EDM corrected
Shakespeare Cliff Basal Sand Shellbed	11	9.34	2	INT	SCBSSB_9.34_#2I_Col_3_a	3	28	23	5	0	0	0	23.01.2019	EDM		4.9152	2.713	EDM
Shakespeare Cliff Basal Sand Shellbed	12	9.34	2	INT	SCBSSB_9.34_#2I_Col_4_a	4	67	37	27	0	3	0	23.01.2019	EDM	annotated image available	4.9152	0.345	LHL	EDM corrected
Shakespeare Cliff Basal Sand Shellbed	13	9.34	2	INT	SCBSSB_9.34_#2I_Col_4_b	4	56	36	16	1	3	0	23.01.2019	EDM	annotated image available	4.9152	0.798	EDM
Shakespeare Cliff Basal Sand Shellbed	14	9.34	4	INT	SCBSSB_9.34_#2I_Col_4_c	4	55	37	6	1	11	0	23.01.2019	EDM	annotated image available	4.9152	0.761	LHL
Shakespeare Cliff Basal Sand Shellbed	15	9.34	2	EXT	SCBSSB_9.34_#2E_Col_7_a	7	39	36	2	0	1	0	23.01.2019	EDM		4.9152	2.018	EDM
Shakespeare Cliff Basal Sand Shellbed	16	9.34	5	INT	SCBSSB_9.34_#5I_Col_7_a	7	39	27	0	0	12	0	24.01.2019	EDM	annotated image available	4.9152	1.455	LHL
Shakespeare Cliff Basal Sand Shellbed	17	9.34	5	INT	SCBSSB_9.34_#5I_Col_2_a	2	36	29	0	0	6	1	24.01.2019	EDM	annotated image available	4.9152	2.281	EDM
Shakespeare Cliff Basal Sand Shellbed	18	9.34	5	INT	SCBSSB_9.34_#5I_Col_1_a	1	36	22	0	0	14	0	24.01.2019	EDM	annotated image available	4.9152	2.636	LHL
Shakespeare Cliff Basal Sand Shellbed	19	9.34	4	INT	SCBSSB_9.34_#4I_Col_9_b	9	48	23	0	0	25	0	24.01.2019	EDM	annotated image available	4.9152	1.617	LHL
Shakespeare Cliff Basal Sand Shellbed	20	9.34	4	INT	SCBSSB_9.34_#4I_Col_9_a	9	59	36	0	0	23	0	24.01.2019	EDM	annotated image available	4.9152	0.582	EDM
Shakespeare Cliff Basal Sand Shellbed	21	9.34	4	EXT	SCBSSB_9.34_#4E_Col_7_a	7	32	17	0	0	15	0	24.01.2019	EDM	annotated image available	4.9152	2.306	LHL
Shakespeare Cliff Basal Sand Shellbed	22	9.34	4	EXT	SCBSSB_9.34_#4E_Col_4_a	4	29	23	0	0	6	0	24.01.2019	EDM	annotated image available	4.9152	2.779	LHL
Shakespeare Cliff Basal Sand Shellbed	23	9.34	12	INT	SCBSSB_9.34_#12I_Col_5_c	5	47	30	12	0	5	0	24.01.2019	EDM	annotated image available	4.9152	0.884	EDM
Shakespeare Cliff Basal Sand Shellbed	24	9.34	12	INT	SCBSSB_9.34_#12I_Col_5_b	5	61	35	16	0	10	0	24.01.2019	EDM	annotated image available	4.9152	0.806	LHL
Shakespeare Cliff Basal Sand Shellbed	25	9.34	12	INT	SCBSSB_9.34_#12I_Col_5_a	5	48	28	6	0	14	0	24.01.2019	EDM	annotated image available	4.9152	0.712	EDM
Shakespeare Cliff Basal Sand Shellbed	26	9.34	12	INT	SCBSSB_9.34_#12I_Col_2_a	2	58	35	15	0	8	0	24.01.2019	EDM	annotated image available	4.9152	0.534	LHL	EDM corrected
Shakespeare Cliff Basal Sand Shellbed	27	9.34	12	INT	SCBSSB_9.34_#12I_Col_1_a	1	45	31	11	0	3	0	24.01.2019	EDM	annotated image available	4.9152	1.4	LHL
Shakespeare Cliff Basal Sand Shellbed	28	9.34	10	INT	SCBSSB_9.34_#10I_Col_17_b	17	53	45	1	0	7	0	24.01.2019	EDM	annotated image available	4.9152	0.948	LHL
Shakespeare Cliff Basal Sand Shellbed	29	9.34	10	INT	SCBSSB_9.34_#10I_Col_17_a	17	43	24	0	0	19	0	24.01.2019	EDM	annotated image available	4.9152	1.505	EDM
Shakespeare Cliff Basal Sand Shellbed	30	9.34	10	INT	SCBSSB_9.34_#10I_Col_15_a	15	54	41	7	0	6	0	24.01.2019	EDM	annotated image available	4.9152	0.886	EDM
Shakespeare Cliff Basal Sand Shellbed	31	9.34	10	EXT	SCBSSB_9.34_#10E_Col_10_a	10	32	20	5	0	7	0	24.01.2019	EDM		4.9152	1.255	EDM
Shakespeare Cliff Basal Sand Shellbed	32	9.34	10	EXT	SCBSSB_9.34_#10E_Col_4_b	4	58	29	10	0	19	0	24.01.2019	EDM	annotated image available	4.9152	0.65	EDM
Shakespeare Cliff Basal Sand Shellbed	33	9.34	10	EXT	SCBSSB_9.34_#10E_Col_4_a	4	55	40	14	0	1	0	24.01.2019	EDM	annotated image available	4.9152	0.633	LHL
Shakespeare Cliff Basal Sand Shellbed	34	9.34	10	EXT	SCBSSB_9.34_#10E_Col_1_a	1	61	27	9	0	25	0	24.01.2019	EDM	annotated image available	4.9152	0.57	LHL
Shakespeare Cliff Basal Sand Shellbed	35	9.34	10	EXT	SCBSSB_9.34_#10E_Col_1_b	1	39	24	10	1	4	0	24.01.2019	EDM	annotated image available	4.9152	2.082	EDM
Shakespeare Cliff Basal Sand Shellbed	36	9.34	10	EXT	SCBSSB_9.34_#10E_Col_3_a	3	54	46	0	0	8	0	24.01.2019	EDM	annotated image available	4.9152	1.629	LHL
Shakespeare Cliff Basal Sand Shellbed	37	9.34	10	EXT	SCBSSB_9.34_#10E_Col_2_b	2	44	20	21	1	2	0	24.01.2019	EDM	annotated image available	4.9152	2.133	EDM
Shakespeare Cliff Basal Sand Shellbed	38	9.34	10	EXT	SCBSSB_9.34_#10E_Col_2_a	2	48	32	12	2	2	0	24.01.2019	EDM	annotated image available	4.9152	1.489	EDM
Shakespeare Cliff Basal Sand Shellbed	39	9.34	10	EXT	SCBSSB_9.34_#10E_Col_1_c	1	49	28	0	0	21	0	24.01.2019	EDM	annotated image available	4.9152	1.878	EDM
Shakespeare Cliff Basal Sand Shellbed	40	9.34	16	EXT	SCBSSB_9.34_#16E_Col_4_a	4	42	28	0	0	14	0	25.01.2019	EDM	annotated image available	4.9152	1.893	EDM
Upper Kai-iwi Shellbed	41	9.38	3	INT	Upper_Kai_iwi_9.38_#3I_Col_16_a	16	51	31	3	0	17	0	29.01.2019	EDM	annotated image available	4.9152	1.513	EDM
Upper Kai-iwi Shellbed	42	9.38	3	INT	Upper_Kai_iwi_9.38_#3I_Col_16_b	16	35	27	0	0	8	0	29.01.2019	EDM	annotated image available	4.9152	2.963	LHL
Upper Kai-iwi Shellbed	43	9.38	8	INT	Upper_Kai_iwi_9.38_#8I_Col_40_a	40	16	13	0	0	3	0	29.01.2019	EDM	annotated image available	4.9152	3.605	EDM
Upper Kai-iwi Shellbed	44	9.38	11	EXT	Upper_Kai_iwi_9.38_#11E_Col_2_a	2	42	29	1	0	12	0	29.01.2019	EDM	annotated image available	4.9152	2.085	LHL
Upper Kai-iwi Shellbed	45	9.38	11	EXT	Upper_Kai_iwi_9.38_#11E_Col_2_b	2	20	12	1	0	7	0	29.01.2019	EDM	annotated image available	4.9152	3.42	EDM
Upper Kai-iwi Shellbed	46	9.38	18	EXT	Upper_Kai_iwi_9.38_#18E_Col_9_a	9	14	13	1	0	0	0	29.01.2019	EDM	annotated image available	4.9152	4.035	EDM
Upper Kai-iwi Shellbed	47	9.4	6	INT	Upper_Kai_iwi_9.40_#6I_Col_3_a	3	44	25	0	0	19	0	29.01.2019	EDM	annotated image available	4.9152	2.136	EDM
Upper Kai-iwi Shellbed	48	9.4	6	INT	Upper_Kai_iwi_9.40_#6I_Col_3_b	3	42	33	4	0	5	0	29.01.2019	EDM	annotated image available	4.9152	2.033	EDM
Upper Kai-iwi Shellbed	49	9.4	22	EXT	Upper_Kai_iwi_9.40_#22E_Col_6_a	6	26	16	0	0	10	0	29.01.2019	EDM	annotated image available	4.9152	3.507	LHL
Upper Kai-iwi Shellbed	50	9.4	22	EXT	Upper_Kai_iwi_9.40_#22E_Col_6_b	6	21	19	0	0	2	0	29.01.2019	EDM	annotated image available	4.9152	2.808	EDM
Upper Kai-iwi Shellbed	51	9.4	24	EXT	Upper_Kai_iwi_9.40_#24E_Col_3_a	3	34	21	0	0	13	0	29.01.2019	EDM	annotated image available	4.9152	2.571	EDM
Upper Kai-iwi Shellbed	52	9.4	24	EXT	Upper_Kai_iwi_9.40_#24E_Col_2_a	2	36	24	3	0	9	0	29.01.2019	EDM	annotated image available	4.9152	2.33	LHL
Upper Kai-iwi Shellbed	53	9.42	9	EXT	Upper_Kai_iwi_9.42_#9E_Col_2_a	2	22	19	0	0	3	0	29.01.2019	EDM	annotated image available	4.9152	2.95	LHL	EDM corrected
Upper Kai-iwi Shellbed	54	9.42	9	EXT	Upper_Kai_iwi_9.42_#9E_Col_21_a	21	26	15	3	0	8	0	29.01.2019	EDM	annotated image available	4.9152	3.134	LHL
Upper Kai-iwi Shellbed	55	9.42	9	EXT	Upper_Kai_iwi_9.42_#9E_Col_21_b	21	32	17	5	2	8	0	29.01.2019	EDM	annotated image available	4.9152	2.439	EDM
Upper Kai-iwi Shellbed	56	9.42	9	EXT	Upper_Kai_iwi_9.42_#9E_Col_21_c	21	22	17	1	0	4	0	29.01.2019	EDM	annotated image available	4.9152	3.15	LHL
Upper Kai-iwi Shellbed	57	9.42	11	EXT	Upper_Kai_iwi_9.42_#11E_Col_8_a	8	20	11	3	2	4	0	29.01.2019	EDM	annotated image available	4.9152	3.501	LHL
Upper Kai-iwi Shellbed	58	9.42	21	EXT	Upper_Kai_iwi_9.42_#21E_Col_1_a	1	25	17	5	1	2	0	29.01.2019	EDM	annotated image available	4.9152	3.148	EDM
Upper Kai-iwi Shellbed	59	9.42	21	EXT	Upper_Kai_iwi_9.42_#21E_Col_1_b	1	14	13	1	0	0	0	29.01.2019	EDM	annotated image available	4.9152	3.65	EDM
Upper Kai-iwi Shellbed	60	9.42	22	EXT	Upper_Kai_iwi_9.42_#22E_Col_1_a	1	46	31	7	0	8	0	29.01.2019	EDM	annotated image available	4.9152	0.658	EDM
Upper Kai-iwi Shellbed	61	9.42	22	EXT	Upper_Kai_iwi_9.42_#22E_Col_1_b	1	38	18	8	0	12	0	29.01.2019	EDM	annotated image available	4.9152	2.261	LHL
Upper Kai-iwi Shellbed	62	9.42	25	EXT	Upper_Kai_iwi_9.42_#25E_Col_2_a	2	45	33	4	0	8	0	29.01.2019	EDM	annotated image available	4.9152	1.794	EDM
Upper Kai-iwi Shellbed	63	9.42	22	EXT	Upper_Kai_iwi_9.42_#22E_Col_9_a	9	28	22	0	0	6	0	29.01.2019	EDM	annotated image available	4.9152	3.057	EDM
Upper Kai-iwi Shellbed	64	9.42	22	EXT	Upper_Kai_iwi_9.42_#22E_Col_11_a	11	45	32	4	0	9	0	29.01.2019	EDM	annotated image available	4.9152	2.077	LHL
Upper Kai-iwi Shellbed	65	9.43	2	EXT	Upper_Kai_iwi_9.43_#2E_Col_13_a	13	70	40	7	0	23	0	29.01.2019	EDM	annotated image available	4.9152	0.72	EDM
Upper Kai-iwi Shellbed	66	9.43	2	EXT	Upper_Kai_iwi_9.43_#2E_Col_13_b	13	41	17	3	0	21	0	29.01.2019	EDM	annotated image available	4.9152	2.883	LHL
Upper Kai-iwi Shellbed	67	9.43	2	EXT	Upper_Kai_iwi_9.43_#2E_Col_34_a	34	49	32	2	0	15	0	29.01.2019	EDM	annotated image available	4.9152	2.89	LHL
Upper Kai-iwi Shellbed	68	9.43	2	EXT	Upper_Kai_iwi_9.43_#2E_Col_34_b	34	20	18	0	0	2	0	29.01.2019	EDM	annotated image available; 2 images b1 and b2 (focus on different zooids)	4.9152	3.794	LHL
Upper Kai-iwi Shellbed	69	9.43	2	INT	Upper_Kai_iwi_9.43_#2I_Col_14_a	14	47	28	2	0	17	0	29.01.2019	EDM	annotated image available	4.9152	1.987	LHL
Upper Kai-iwi Shellbed	70	9.43	2	INT	Upper_Kai_iwi_9.43_#2I_Col_14_b	14	28	15	1	0	12	0	29.01.2019	EDM	annotated image available	4.9152	2.78	LHL
Upper Kai-iwi Shellbed	71	9.43	21	EXT	Upper_Kai_iwi_9.43_#21E_Col_1_a	1	42	25	5	0	12	0	29.01.2019	EDM	annotated image available	4.9152	1.295	EDM
Upper Kai-iwi Shellbed	72	9.43	21	EXT	Upper_Kai_iwi_9.43_#21E_Col_1_b	1	40	20	7	1	12	0	29.01.2019	EDM	annotated image available	4.9152	1.632	EDM
Upper Kai-iwi Shellbed	73	9.43	21	EXT	Upper_Kai_iwi_9.43_#21E_Col_5_a	5	47	35	8	0	4	0	29.01.2019	EDM	annotated image available	4.9152	1.016	EDM
Upper Kai-iwi Shellbed	74	9.43	21	EXT	Upper_Kai_iwi_9.43_#21E_Col_6_a	6	11	9	2	0	0	0	29.01.2019	EDM	annotated image available	4.9152	3.849	EDM
Upper Kai-iwi Shellbed	75	9.43	44	EXT	Upper_Kai_iwi_9.43_#44E_Col_8_a	8	41	29	1	0	11	0	29.01.2019	EDM	annotated image available; 2 images b1 and b2 (focus on different zooids)	4.9152	2.087	EDM
Upper Kai-iwi Shellbed	76	9.43	43	INT	Upper_Kai_iwi_9.43_#43I_Col_3_a	3	51	31	11	2	7	0	29.01.2019	EDM	annotated image available	4.9152	1.397	LHL
Upper Kai-iwi Shellbed	77	9.43	43	INT	Upper_Kai_iwi_9.43_#43I_Col_4_a	4	66	36	18	0	12	0	29.01.2019	EDM	annotated image available	4.9152	0.591	EDM
Upper Kai-iwi Shellbed	78	9.43	43	INT	Upper_Kai_iwi_9.43_#43I_Col_4_b	4	27	21	4	0	2	0	29.01.2019	EDM	annotated image available	4.9152	2.7	EDM
Upper Kai-iwi Shellbed	79	9.43	43	INT	Upper_Kai_iwi_9.43_#43I_Col_4_c	4	23	14	3	2	4	0	29.01.2019	EDM	annotated image available	4.9152	3.148	EDM
Upper Kai-iwi Shellbed	80	9.44	1	INT	Upper_Kai_iwi_9.44_#1I_Col_7_b	7	13	7	1	0	5	0	29.01.2019	EDM		4.9152	3.508	EDM
Lower Kai-iwi Shellbed	81	9.37	3	EXT	Lower_Kai_iwi_9.37_#3E_Col_2_a	2	50	26	0	0	24	0	31.01.2019	EDM	annotated image available	4.9152	0.623	EDM
Lower Kai-iwi Shellbed	82	9.37	3	EXT	Lower_Kai_iwi_9.37_#3E_Col_2_b	2	28	13	3	0	12	0	31.01.2019	EDM	annotated image available	4.9152	1.8	EDM
Lower Kai-iwi Shellbed	83	9.37	4	EXT	Lower_Kai_iwi_9.37_#4E_Col_1_a	1	21	18	0	0	3	0	31.01.2019	EDM	annotated image available	4.9152	3.147	EDM
Lower Kai-iwi Shellbed	84	9.37	4	EXT	Lower_Kai_iwi_9.37_#4E_Col_2_a	2	30	19	0	0	11	0	31.01.2019	EDM	annotated image available	4.9152	2.1	LHL
Lower Kai-iwi Shellbed	85	9.37	4	EXT	Lower_Kai_iwi_9.37_#4E_Col_4_a	4	43	24	0	0	19	0	31.01.2019	EDM	annotated image available	4.9152	1.306	EDM
Lower Kai-iwi Shellbed	86	9.37	4	INT	Lower_Kai_iwi_9.37_#4I_Col_3_a	3	23	11	0	2	10	0	31.01.2019	EDM	annotated image available	4.9152	3.282	EDM
Lower Kai-iwi Shellbed	87	9.37	4	INT	Lower_Kai_iwi_9.37_#4I_Col_4_a	4	10	7	0	0	3	0	31.01.2019	EDM	annotated image available	4.9152	4.152	LHL
Lower Kai-iwi Shellbed	88	58	7	EXT	Lower_Kai_iwi_58_#7E_Col_1_a	1	31	14	1	4	12	0	31.01.2019	EDM	annotated image available	4.9152	2.385	LHL
Lower Kai-iwi Shellbed	89	58	7	EXT	Lower_Kai_iwi_58_#7E_Col_2_a	2	51	32	4	1	14	0	31.01.2019	EDM	annotated image available	4.9152	1.811	LHL
Lower Kai-iwi Shellbed	90	58	7	EXT	Lower_Kai_iwi_58_#7E_Col_3_a	3	17	10	2	0	5	0	31.01.2019	EDM	annotated image available	4.9152	3.002	EDM
Lower Kai-iwi Shellbed	91	58	7	EXT	Lower_Kai_iwi_58_#7E_Col_7_a	7	22	16	1	0	5	0	31.01.2019	EDM	annotated image available	4.9152	2.933	EDM
Lower Kai-iwi Shellbed	92	58	8	EXT	Lower_Kai_iwi_58_#8E_Col_1_a	1	34	16	2	3	13	0	31.01.2019	EDM	annotated image available	4.9152	1.777	EDM
Lower Kai-iwi Shellbed	93	58	8	EXT	Lower_Kai_iwi_58_#8E_Col_7_a	7	38	20	6	2	10	0	31.01.2019	EDM	annotated image available	4.9152	1.826	LHL
Lower Kai-iwi Shellbed	94	58	24	EXT	Lower_Kai_iwi_58_#24E_Col_9_a	9	37	23	6	1	7	0	31.01.2019	EDM	annotated image available	4.9152	0.762	EDM
Lower Kai-iwi Shellbed	95	58	24	EXT	Lower_Kai_iwi_58_#24E_Col_9_b	9	27	17	2	1	7	0	31.01.2019	EDM	annotated image available	4.9152	1.827	EDM
Lower Kai-iwi Shellbed	96	58	24	EXT	Lower_Kai_iwi_58_#24E_Col_10_a	10	18	10	0	0	8	0	31.01.2019	EDM	annotated image available	4.9152	3.113	EDM
Lower Kai-iwi Shellbed	97	58	25	EXT	Lower_Kai_iwi_58_#25E_Col_1_a	1	41	21	7	1	12	0	31.01.2019	EDM	annotated image available	4.9152	0.931	LHL
Lower Kai-iwi Shellbed	98	58	25	EXT	Lower_Kai_iwi_58_#25E_Col_3_a	3	33	19	14	0	0	0	31.01.2019	EDM	annotated image available	4.9152	1.75	LHL
Lower Kai-iwi Shellbed	99	58	25	EXT	Lower_Kai_iwi_58_#25E_Col_5_a	5	16	10	4	0	2	0	31.01.2019	EDM	annotated image available	4.9152	3.185	EDM
Lower Kai-iwi Shellbed	100	60	1	EXT	Lower_Kai_iwi_60_#1E_Col_1_a	1	42	20	0	3	19	0	31.01.2019	EDM	annotated image available	4.9152	1.904	LHL							0
Lower Kai-iwi Shellbed	101	60	3	EXT	Lower_Kai_iwi_60_#3E_Col_1_a	1	27	16	3	0	8	0	31.01.2019	EDM	annotated image available	4.9152	2.323	LHL							0
Lower Kai-iwi Shellbed	102	60	4	EXT	Lower_Kai_iwi_60_#4E_Col_1_a	1	55	28	1	0	26	0	31.01.2019	EDM	annotated image available	4.9152	1.13	LHL
Lower Kai-iwi Shellbed	103	60	4	EXT	Lower_Kai_iwi_60_#4E_Col_2_a	2	23	11	3	2	7	0	31.01.2019	EDM	annotated image available	4.9152	3.025	LHL
Lower Kai-iwi Shellbed	104	60	5	EXT	Lower_Kai_iwi_60_#5E_Col_1_a	1	46	21	6	3	16	0	31.01.2019	EDM	annotated image available	4.9152	0.855	EDM
Lower Kai-iwi Shellbed	105	60	5	EXT	Lower_Kai_iwi_60_#5E_Col_1_b	1	44	16	7	5	16	0	31.01.2019	EDM	annotated image available	4.9152	0.967	EDM
Lower Kai-iwi Shellbed	106	60	7	EXT	Lower_Kai_iwi_60_#7E_Col_1_a	1	44	29	0	0	15	0	31.01.2019	EDM	annotated image available	4.9152	1.008	EDM
Lower Kai-iwi Shellbed	107	60	7	EXT	Lower_Kai_iwi_60_#7E_Col_2_a	2	31	17	0	0	14	0	31.01.2019	EDM	annotated image available	4.9152	2.402	EDM
Lower Kai-iwi Shellbed	108	61	19	EXT	Lower_Kai_iwi_61_#19E_Col_1_a	1	30	14	1	0	15	0	31.01.2019	EDM	annotated image available	4.9152	2.528	LHL
Lower Kai-iwi Shellbed	109	61	19	EXT	Lower_Kai_iwi_61_#19E_Col_2_a	2	30	16	1	0	13	0	31.01.2019	EDM	annotated image available	4.9152	2.316	EDM
Lower Kai-iwi Shellbed	110	61	19	EXT	Lower_Kai_iwi_61_#19E_Col_5_a	5	39	24	5	0	10	0	31.01.2019	EDM	annotated image available	4.9152	1.257	LHL
Lower Kai-iwi Shellbed	111	61	19	EXT	Lower_Kai_iwi_61_#19E_Col_6_a	6	23	12	0	0	11	0	31.01.2019	EDM	annotated image available	4.9152	3.139	LHL
Lower Kai-iwi Shellbed	112	61	19	EXT	Lower_Kai_iwi_61_#19E_Col_7_a	7	26	17	2	0	7	0	31.01.2019	EDM	annotated image available	4.9152	2.46	EDM
Lower Kai-iwi Shellbed	113	61	23	EXT	Lower_Kai_iwi_61_#23E_Col_1_a	1	40	24	3	0	13	0	31.01.2019	EDM	annotated image available	4.9152	1.773	LHL
Lower Kai-iwi Shellbed	114	61	23	EXT	Lower_Kai_iwi_61_#23E_Col_7_a	7	33	24	0	0	9	0	31.01.2019	EDM	annotated image available	4.9152	2.255	EDM
Lower Kai-iwi Shellbed	115	61	25	EXT	Lower_Kai_iwi_61_#25E_Col_1_a	1	26	19	0	0	7	0	31.01.2019	EDM	annotated image available	4.9152	2.329	EDM
Lower Kai-iwi Shellbed	116	61	25	EXT	Lower_Kai_iwi_61_#25E_Col_2_a	2	38	20	4	1	13	0	31.01.2019	EDM	annotated image available	4.9152	2.182	LHL
Lower Kai-iwi Shellbed	117	61	25	EXT	Lower_Kai_iwi_61_#25E_Col_2_b	2	16	8	1	1	6	0	31.01.2019	EDM	annotated image available	4.9152	3.877	LHL
Lower Kai-iwi Shellbed	118	61	25	EXT	Lower_Kai_iwi_61_#25E_Col_3_a	3	44	21	3	0	20	0	31.01.2019	EDM	annotated image available	4.9152	1.727	LHL
Lower Kai-iwi Shellbed	119	61	25	EXT	Lower_Kai_iwi_61_#25E_Col_4_a	4	40	18	2	4	16	0	31.01.2019	EDM	annotated image available	4.9152	1.83	EDM
Lower Kai-iwi Shellbed	120	59	25	EXT	Lower_Kai_iwi_59_#25E_Col_1_a	1	33	18	3	0	12	0	31.01.2019	EDM	annotated image available	4.9152	2.061	EDM
Landguard Formation	121	97	1	INT	Landguard_97_#1I_Col_1_a	1	54	26	0	0	28	0	06.02.2019	EDM	annotated image available	4.9152	2.141	LHL
Landguard Formation	122	97	1	INT	Landguard_97_#1I_Col_2_a	2	21	10	0	0	11	0	06.02.2019	EDM	annotated image available	4.9152	3.44	EDM
Landguard Formation	123	97	2	INT	Landguard_97_#2I_Col_2_a	2	24	23	0	0	0	1	06.02.2019	EDM	annotated image available	4.9152	2.752	EDM
Landguard Formation	124	97	4	INT	Landguard_97_#4I_Col_5_a	5	59	57	0	0	2	0	06.02.2019	EDM	annotated image available	4.9152	0.652	LHL
Landguard Formation	125	97	4	INT	Landguard_97_#4I_Col_6_a	6	44	38	0	0	6	0	06.02.2019	EDM	annotated image available	4.9152	1.949	LHL
Landguard Formation	126	97	6	EXT	Landguard_97_#6E_Col_8_a	8	48	28	2	0	18	0	06.02.2019	EDM	annotated image available	4.9152	2.05	LHL
Landguard Formation	127	97	6	EXT	Landguard_97_#6E_Col_8_b	8	61	43	4	0	14	0	06.02.2019	EDM	annotated image available	4.9152	0.902	EDM
Landguard Formation	128	97	6	EXT	Landguard_97_#6E_Col_11_a	11	56	46	1	0	9	0	06.02.2019	EDM	annotated image available	4.9152	0.807	EDM
Landguard Formation	129	97	13	INT	Landguard_97_#13I_Col_1_a	1	58	37	1	0	20	0	06.02.2019	EDM	annotated image available	4.9152	1.014	EDM
Landguard Formation	130	97	14	EXT	Landguard_97_#14E_Col_3_a	3	79	66	3	0	10	0	06.02.2019	EDM	annotated image available	4.9152	0.688	LHL
Landguard Formation	131	97	14	EXT	Landguard_97_#14E_Col_3_b	3	56	50	0	0	6	0	06.02.2019	EDM	annotated image available	4.9152	1.657	EDM
Landguard Formation	132	97	14	EXT	Landguard_97_#14E_Col_4_a	4	44	38	0	0	6	0	06.02.2019	EDM	annotated image available	4.9152	0.889	LHL
Landguard Formation	133	97	14	EXT	Landguard_97_#14E_Col_5_a	5	47	27	2	0	18	0	06.02.2019	EDM	annotated image available	4.9152	0.679	EDM
Landguard Formation	134	97	14	EXT	Landguard_97_#14E_Col_5_b	5	55	25	21	0	9	0	06.02.2019	EDM	annotated image available	4.9152	0.797	EDM
Landguard Formation	135	97	14	EXT	Landguard_97_#14E_Col_5_c	5	39	21	15	0	3	0	06.02.2019	EDM	annotated image available	4.9152	1.629	EDM
Landguard Formation	136	97	14	EXT	Landguard_97_#14E_Col_6_a	6	77	43	23	0	11	0	06.02.2019	EDM	annotated image available	4.9152	0.624	LHL
Landguard Formation	137	97	14	EXT	Landguard_97_#14E_Col_6_b	6	74	44	21	0	9	0	06.02.2019	EDM	annotated image available	4.9152	1.003	LHL
Landguard Formation	138	97	14	EXT	Landguard_97_#14E_Col_13_a	13	69	46	12	0	11	0	06.02.2019	EDM	annotated image available	4.9152	0.826	EDM
Landguard Formation	139	97	14	EXT	Landguard_97_#14E_Col_18_a	18	40	35	3	0	2	0	06.02.2019	EDM	annotated image available	4.9152	2.451	LHL
Landguard Formation	140	97	14	EXT	Landguard_97_#14E_Col_20_a	20	50	33	9	3	5	0	06.02.2019	EDM	annotated image available	4.9152	1.869	LHL
Landguard Formation	141	97	18	INT	Landguard_97_#18I_Col_1_a	1	52	25	7	0	20	0	06.02.2019	EDM	annotated image available	4.9152	1.79	LHL
Landguard Formation	142	97	19	INT	Landguard_97_#19I_Col_1_a	1	45	22	12	0	11	0	06.02.2019	EDM	annotated image available	4.9152	0.962	EDM
Landguard Formation	143	97	20	INT	Landguard_97_#20I_Col_1_a	1	51	35	5	0	11	0	06.02.2019	EDM	annotated image available	4.9152	1.39	EDM
Landguard Formation	144	97	20	INT	Landguard_97_#20I_Col_2_a	2	32	32	0	0	0	0	06.02.2019	EDM	annotated image available	4.9152	2.664	EDM
Landguard Formation	145	97	20	INT	Landguard_97_#20I_Col_3_a	3	51	42	0	0	9	0	06.02.2019	EDM	annotated image available	4.9152	1.517	EDM
Landguard Formation	146	97	20	INT	Landguard_97_#20I_Col_4_a	4	62	46	0	0	16	0	06.02.2019	EDM	annotated image available	4.9152	1.557	LHL
Landguard Formation	147	97	23	INT	Landguard_97_#23I_Col_1_a	1	77	52	7	0	18	0	06.02.2019	EDM	annotated image available	4.9152	0.607	EDM
Landguard Formation	148	97	24	INT	Landguard_97_#24I_Col_1_a	1	67	42	0	0	25	0	06.02.2019	EDM	annotated image available	4.9152	1.067	EDM
Landguard Formation	149	97	24	INT	Landguard_97_#24I_Col_2_a	2	58	47	0	0	11	0	06.02.2019	EDM	annotated image available	4.9152	1.107	LHL	EDM corrected
Landguard Formation	150	98	2	INT	Landguard_98_#2I_Col_1_a	1	44	27	15	0	2	0	06.02.2019	EDM	annotated image available	4.9152	1.71	LHL	EDM corrected
Landguard Formation	151	98	5	INT	Landguard_98_#5I_Col_1_a	1	52	28	0	0	24	0	07.02.2019	EDM	annotated image available	4.9152	2.183	LHL
Landguard Formation	152	98	11	INT	Landguard_98_#11I_Col_1_a	1	32	23	2	0	7	0	07.02.2019	EDM	annotated image available	4.9152	2.755	EDM
Landguard Formation	153	98	11	INT	Landguard_98_#11I_Col_1_b	1	42	34	2	0	6	0	07.02.2019	EDM	annotated image available	4.9152	1.9	EDM
Landguard Formation	154	98	11	INT	Landguard_98_#11I_Col_2_a	2	50	31	18	0	1	0	07.02.2019	EDM	annotated image available	4.9152	1.573	EDM
Landguard Formation	155	98	11	INT	Landguard_98_#11I_Col_2_b	2	36	28	7	1	0	0	07.02.2019	EDM	annotated image available	4.9152	2.242	LHL	EDM corrected
Landguard Formation	156	98	19	INT	Landguard_98_#19I_Col_2_a	2	27	23	2	0	2	0	07.02.2019	EDM	annotated image available	4.9152	2.933	EDM
Landguard Formation	157	98	19	INT	Landguard_98_#19I_Col_2_b	2	55	43	4	0	8	0	07.02.2019	EDM	annotated image available	4.9152	1.321	EDM
Landguard Formation	158	98	19	INT	Landguard_98_#19I_Col_5_a	5	16	14	0	0	2	0	07.02.2019	EDM	annotated image available	4.9152	3.427	LHL
Nukumaru Limestone	159	9.8	1	EXT	NKLS_9.8_#1E_Col_13_a	13	29	26	0	0	3	0	07.02.2019	EDM	annotated image available	4.9152	1.631	LHL
Nukumaru Limestone	160	9.8	1	EXT	NKLS_9.8_#1E_Col_16_a	16	18	14	1	0	3	0	07.02.2019	EDM	annotated image available	4.9152	3.873	LHL
Nukumaru Limestone	161	9.8	1	INT	NKLS_9.8_#1I_Col_27_a	27	48	39	0	0	9	0	07.02.2019	EDM	annotated image available	4.9152	1.917	EDM
Nukumaru Limestone	162	9.8	6	INT	NKLS_9.8_#6I_Col_3_a	3	49	44	3	0	2	0	07.02.2019	EDM	annotated image available	4.9152	2.298	LHL
Nukumaru Limestone	163	9.8	6	INT	NKLS_9.8_#6I_Col_4_a	4	63	46	5	0	12	0	07.02.2019	EDM	annotated image available	4.9152	1.814	EDM
Nukumaru Limestone	164	9.8	6	INT	NKLS_9.8_#6I_Col_11_a	11	40	20	18	0	2	0	07.02.2019	EDM	annotated image available	4.9152	1.984	EDM
Nukumaru Limestone	165	9.8	8	EXT	NKLS_9.8_#8E_Col_1_a	1	25	15	10	0	0	0	07.02.2019	EDM	annotated image available	4.9152	2.665	EDM
Nukumaru Limestone	166	9.8	15	INT	NKLS_9.8_#15I_Col_9_a	9	50	41	0	0	9	0	07.02.2019	EDM	annotated image available	4.9152	1.766	EDM
Nukumaru Limestone	167	9.8	15	INT	NKLS_9.8_#15I_Col_9_b	9	48	29	6	0	13	0	07.02.2019	EDM	annotated image available	4.9152	2.081	LHL
Nukumaru Limestone	168	9.8	16	EXT	NKLS_9.8_#16E_Col_1_a	1	56	37	11	0	8	0	07.02.2019	EDM	annotated image available	4.9152	1.736	LHL
Nukumaru Limestone	169	9.8	18	EXT	NKLS_9.8_#18E_Col_1_a	1	50	45	0	0	5	0	07.02.2019	EDM	annotated image available	4.9152	1.976	LHL
Nukumaru Limestone	170	9.8	18	INT	NKLS_9.8_#18I_Col_1_a	1	73	36	9	0	28	0	07.02.2019	EDM	annotated image available	4.9152	0.952	LHL
Nukumaru Limestone	171	9.8	18	INT	NKLS_9.8_#18I_Col_1_b	1	47	30	14	0	3	0	07.02.2019	EDM	annotated image available	4.9152	0.869	EDM
Nukumaru Limestone	172	9.8	18	INT	NKLS_9.8_#18I_Col_4_a	4	69	44	22	0	3	0	07.02.2019	EDM	annotated image available	4.9152	0	EDM
Nukumaru Limestone	173	9.8	18	INT	NKLS_9.8_#18I_Col_4_b	4	58	41	14	0	3	0	07.02.2019	EDM	annotated image available	4.9152	0.741	EDM
Nukumaru Limestone	174	9.8	20	INT	NKLS_9.8_#20I_Col_1_a	1	60	39	7	0	14	0	07.02.2019	EDM	annotated image available	4.9152	1.42	LHL
Nukumaru Limestone	175	9.8	20	INT	NKLS_9.8_#20I_Col_2_a	2	80	42	0	0	38	0	07.02.2019	EDM	annotated image available	4.9152	0.597	EDM
Nukumaru Limestone	176	9.8	22	INT	NKLS_9.8_#22I_Col_8_a	8	59	37	12	0	10	0	07.02.2019	EDM	annotated image available	4.9152	1.448	LHL
Nukumaru Limestone	177	9.8	22	INT	NKLS_9.8_#22I_Col_8_b	8	17	14	3	0	0	0	07.02.2019	EDM	annotated image available	4.9152	4.024	LHL
Nukumaru Limestone	178	9.8	28	INT	NKLS_9.8_#28I_Col_8_a	8	37	25	0	0	12	0	07.02.2019	EDM	annotated image available	4.9152	2.753	EDM
Nukumaru Limestone	179	9.8	32	INT	NKLS_9.8_#32I_Col_10_a	10	67	57	5	1	4	0	07.02.2019	EDM	annotated image available	4.9152	0.867	EDM
Nukumaru Limestone	180	9.8	35	INT	NKLS_9.8_#35I_Col_12_a	12	82	52	26	0	4	0	07.02.2019	EDM	annotated image available	4.9152	0.234	EDM
Nukumaru Limestone	181	9.8	35	INT	NKLS_9.8_#35I_Col_12_b	12	54	26	9	0	19	0	07.02.2019	EDM	annotated image available	4.9152	1.609	LHL
Nukumaru Limestone	182	9.8	35	INT	NKLS_9.8_#35I_Col_12_c	12	67	40	25	0	2	0	07.02.2019	EDM	annotated image available	4.9152	0.311	EDM
Nukumaru Limestone	183	9.8	35	INT	NKLS_9.8_#35I_Col_17_a	17	64	46	12	0	6	0	07.02.2019	EDM	annotated image available	4.9152	1.475	LHL
Nukumaru Limestone	184	9.8	35	INT	NKLS_9.8_#35I_Col_17_b	17	75	46	29	0	0	0	07.02.2019	EDM	annotated image available	4.9152	0.43	EDM
Nukumaru Limestone	185	9.8	35	INT	NKLS_9.8_#35I_Col_18_a	18	78	49	29	0	0	0	07.02.2019	EDM	annotated image available	4.9152	0.19	EDM
Nukumaru Limestone	186	9.8	35	INT	NKLS_9.8_#35I_Col_18_b	18	60	37	16	0	7	0	07.02.2019	EDM	annotated image available	4.9152	0.247	LHL
Nukumaru Limestone	187	9.8	35	INT	NKLS_9.8_#35I_Col_18_c	18	77	53	24	0	0	0	07.02.2019	EDM	annotated image available	4.9152	0.308	LHL
Nukumaru Limestone	188	9.8	38	EXT	NKLS_9.8_#38E_Col_12_a	12	76	47	7	0	22	0	07.02.2019	EDM	annotated image available	4.9152	0.45	LHL	EDM corrected
Nukumaru Limestone	189	9.1	16	INT	NKLS_9.10_#16I_Col_2_a	2	42	22	19	0	1	0	07.02.2019	EDM	annotated image available	4.9152	1.812	EDM
Nukumaru Limestone	190	9.1	16	INT	NKLS_9.10_#16I_Col_2_b	2	62	44	5	0	13	0	07.02.2019	EDM	annotated image available	4.9152	0.841	LHL
Nukumaru Limestone	191	9.1	16	INT	NKLS_9.10_#16I_Col_2_c	2	54	37	9	0	8	0	07.02.2019	EDM	annotated image available	4.9152	1.86	LHL
Nukumaru Limestone	192	9.1	16	INT	NKLS_9.10_#16I_Col_2_d	2	72	56	4	0	12	0	07.02.2019	EDM	annotated image available	4.9152	0.676	EDM
Nukumaru Limestone	193	9.12	17	EXT	NKLS_9.12_#17E_Col_15_a	15	73	41	28	0	4	0	07.02.2019	EDM	annotated image available	4.9152	0.66	EDM
Nukumaru Limestone	194	9.12	17	EXT	NKLS_9.12_#17E_Col_16_a	16	61	42	10	0	9	0	07.02.2019	EDM	annotated image available	4.9152	1.192	EDM
Nukumaru Limestone	195	9.12	3	INT	NKLS_9.12_#3I_Col_15_a	15	64	58	0	0	6	0	07.02.2019	EDM	annotated image available	4.9152	1.009	EDM
Nukumaru Limestone	196	9.12	3	EXT	NKLS_9.12_#3E_Col_24_a	24	48	45	1	0	2	0	07.02.2019	EDM	annotated image available	4.9152	1.079	LHL	EDM corrected
Nukumaru Limestone	197	9.12	3	EXT	NKLS_9.12_#3E_Col_12_a	12	67	67	0	0	0	0	07.02.2019	EDM	annotated image available	4.9152	1.106	EDM
Nukumaru Limestone	198	9.12	3	EXT	NKLS_9.12_#3E_Col_4_a	4	57	51	5	0	1	0	07.02.2019	EDM	annotated image available	4.9152	1.794	LHL
Nukumaru Brown Sand	199	9.6	7	INT	NKBS_9.6_#7I_Col_19_a	19	49	32	0	0	17	0	08.02.2019	EDM	annotated image available	4.9152	1.019	EDM
Nukumaru Brown Sand	200	9.6	7	INT	NKBS_9.6_#7I_Col_19_b	19	48	33	4	0	11	0	08.02.2019	EDM	annotated image available	4.9152	1.281	LHL
Nukumaru Brown Sand	201	9.6	7	INT	NKBS_9.6_#7I_Col_19_c	19	55	39	2	0	14	0	08.02.2019	EDM	annotated image available	4.9152	1.557	LHL
Nukumaru Brown Sand	202	9.6	7	INT	NKBS_9.6_#7I_Col_13_a	13	43	32	0	0	11	0	08.02.2019	EDM	annotated image available	4.9152	2.153	EDM
Nukumaru Brown Sand	203	9.6	6	EXT	NKBS_9.6_#6E_Col_26_a	26	27	23	3	0	1	0	08.02.2019	EDM	annotated image available	4.9152	2.666	EDM
Nukumaru Brown Sand	204	9.6	7	INT	NKBS_9.6_#7I_Col_5_a	5	54	43	4	0	7	0	08.02.2019	EDM	annotated image available	4.9152	2.066	LHL
Nukumaru Brown Sand	205	9.6	7	INT	NKBS_9.6_#7I_Col_5_b	5	46	35	8	0	3	0	08.02.2019	EDM	annotated image available	4.9152	1.04	LHL	EDM corrected
Nukumaru Brown Sand	206	9.6	1	INT	NKBS_9.6_#1I_Col_5_a	5	53	32	0	0	21	0	08.02.2019	EDM	annotated image available	4.9152	1.105	LHL	EDM corrected
Nukumaru Brown Sand	207	9.6	1	INT	NKBS_9.6_#1I_Col_6_a	6	47	31	3	0	13	0	08.02.2019	EDM	annotated image available	4.9152	1.565	EDM
Nukumaru Brown Sand	208	9.6	2	INT	NKBS_9.6_#2I_Col_24_a	24	21	21	0	0	0	0	08.02.2019	EDM	annotated image available	4.9152	3.086	EDM
Nukumaru Brown Sand	209	9.6	4	INT	NKBS_9.6_#4I_Col_6_a	6	44	28	13	0	3	0	08.02.2019	EDM	annotated image available	4.9152	1.855	LHL
Nukumaru Brown Sand	210	9.6	4	INT	NKBS_9.6_#4I_Col_6_b	6	35	34	0	0	1	0	08.02.2019	EDM	annotated image available	4.9152	2.688	LHL
Nukumaru Brown Sand	211	9.6	4	INT	NKBS_9.6_#4I_Col_6_c	6	42	30	10	0	2	0	08.02.2019	EDM	annotated image available	4.9152	2.36	LHL
Nukumaru Brown Sand	212	9.6	6	EXT	NKBS_9.6_#6E_Col_1_a	1	39	23	5	0	11	0	08.02.2019	EDM	annotated image available	4.9152	2.476	LHL
Nukumaru Brown Sand	213	9.6	6	EXT	NKBS_9.6_#6E_Col_1_b	1	44	33	0	0	11	0	08.02.2019	EDM	annotated image available	4.9152	2.655	LHL
Nukumaru Brown Sand	214	9.6	6	EXT	NKBS_9.6_#6E_Col_2_a	2	65	54	0	0	11	0	08.02.2019	EDM	annotated image available	4.9152	1.409	LHL
Nukumaru Brown Sand	215	9.6	6	EXT	NKBS_9.6_#6E_Col_11_a	11	64	58	4	0	2	0	08.02.2019	EDM	annotated image available	4.9152	1.32	LHL	EDM corrected
Nukumaru Brown Sand	216	9.6	6	EXT	NKBS_9.6_#6E_Col_13_a	13	36	28	0	0	8	0	08.02.2019	EDM	annotated image available; 2 images a1 and a2 (focus on different zooids)	4.9152	2.543	LHL
Nukumaru Brown Sand	217	9.6	9	INT	NKBS_9.6_#9I_Col_10_a	10	45	31	3	0	11	0	08.02.2019	EDM	annotated image available	4.9152	1.39	LHL
Nukumaru Brown Sand	218	9.6	9	INT	NKBS_9.6_#9I_Col_10_b	10	53	35	6	3	9	0	08.02.2019	EDM	annotated image available	4.9152	1.112	LHL
Nukumaru Brown Sand	219	9.6	9	INT	NKBS_9.6_#9I_Col_10_c	10	37	25	2	0	10	0	08.02.2019	EDM	annotated image available	4.9152	1.679	LHL	EDM corrected
Nukumaru Brown Sand	220	9.6	9	INT	NKBS_9.6_#9I_Col_10_d	10	20	12	1	0	7	0	08.02.2019	EDM	annotated image available	4.9152	2.887	EDM
Nukumaru Brown Sand	221	9.6	9	INT	NKBS_9.6_#9I_Col_18_a	18	60	45	4	0	11	0	08.02.2019	EDM	annotated image available	4.9152	1.095	LHL	EDM corrected
Nukumaru Brown Sand	222	9.6	16	EXT	NKBS_9.6_#16E_Col_5_a	5	58	52	3	0	3	0	08.02.2019	EDM	annotated image available	4.9152	0.561	EDM
Nukumaru Brown Sand	223	9.6	16	EXT	NKBS_9.6_#16E_Col_5_b	5	68	56	11	0	1	0	08.02.2019	EDM	annotated image available	4.9152	0.378	EDM
Nukumaru Brown Sand	224	9.6	16	EXT	NKBS_9.6_#16E_Col_6_a	6	55	36	13	0	6	0	08.02.2019	EDM	annotated image available	4.9152	1.285	LHL
Nukumaru Brown Sand	225	9.6	17	EXT	NKBS_9.6_#17E_Col_9_a	9	60	39	8	2	11	0	08.02.2019	EDM	annotated image available	4.9152	0.571	LHL
Nukumaru Brown Sand	226	9.6	17	EXT	NKBS_9.6_#17E_Col_9_b	9	64	41	6	1	16	0	08.02.2019	EDM	annotated image available	4.9152	1.015	LHL	EDM corrected
Nukumaru Brown Sand	227	9.6	17	EXT	NKBS_9.6_#17E_Col_9_c	9	64	39	4	0	21	0	08.02.2019	EDM	annotated image available	4.9152	0.81	EDM
Nukumaru Brown Sand	228	9.6	17	EXT	NKBS_9.6_#17E_Col_9_d	9	45	30	5	0	10	0	08.02.2019	EDM	annotated image available	4.9152	1.667	EDM
Nukumaru Brown Sand	229	9.25	10	INT	NKBS_9.25_#10I_Col_14_a	14	50	33	14	0	3	0	08.02.2019	EDM	annotated image available	4.9152	2.014	LHL	EDM corrected
Nukumaru Brown Sand	230	9.25	10	INT	NKBS_9.25_#10I_Col_14_b	14	20	12	7	0	1	0	08.02.2019	EDM	annotated image available	4.9152	3.714	LHL
Nukumaru Brown Sand	231	9.25	15	INT	NKBS_9.25_#15I_Col_4_a	4	39	23	15	1	0	0	08.02.2019	EDM	annotated image available	4.9152	2.308	EDM
Nukumaru Brown Sand	232	9.25	18	INT	NKBS_9.25_#18I_Col_22_a	22	30	25	0	0	5	0	08.02.2019	EDM	annotated image available	4.9152	3.138	EDM
Nukumaru Brown Sand	233	9.25	18	INT	NKBS_9.25_#18I_Col_22_b	22	29	28	0	1	0	0	08.02.2019	EDM	annotated image available	4.9152	3.001	EDM
Nukumaru Brown Sand	234	9.25	27	EXT	NKBS_9.25_#27E_Col_2_a	2	27	24	3	0	0	0	08.02.2019	EDM	annotated image available	4.9152	3.103	LHL
Nukumaru Brown Sand	235	9.25	27	INT	NKBS_9.25_#27I_Col_6_a	6	34	25	0	0	9	0	08.02.2019	EDM	annotated image available	4.9152	2.757	EDM
Nukumaru Brown Sand	236	9.25	29a	EXT	NKBS_9.25_#29aE_Col_15_a	15	63	33	28	0	2	0	08.02.2019	EDM	annotated image available	4.9152	1.488	EDM
Nukumaru Brown Sand	237	9.25	29a	EXT	NKBS_9.25_#29aE_Col_15_b	15	77	41	32	0	4	0	08.02.2019	EDM	annotated image available	4.9152	0.962	EDM
Nukumaru Brown Sand	238	9.25	10	INT	NKBS_9.25_#10I_Col_8_a	8	17	13	2	0	2	0	08.02.2019	EDM	annotated image available	4.9152	3.954	LHL
Lower Kai-iwi Shellbed	239	62	28	EXT	Lower_Kai_iwi_62_#28E_Col_1_a	1	27	17	0	0	10	0	16.03.2019	EDM	annotated image available	4.9152	2.705	LHL
Lower Kai-iwi Shellbed	240	62	27	EXT	Lower_Kai_iwi_62_#27E_Col_2_a	2	33	10	2	0	21	0	16.03.2019	EDM	annotated image available	4.9152	2.29	EDM
Lower Kai-iwi Shellbed	241	62	27	EXT	Lower_Kai_iwi_62_#27E_Col_1_a	1	48	23	3	0	22	0	16.03.2019	EDM	annotated image available	4.9152	1.394	LHL
Lower Kai-iwi Shellbed	242	62	26	EXT	Lower_Kai_iwi_62_#26E_Col_1_a	1	43	24	0	0	19	0	16.03.2019	EDM	annotated image available	4.9152	1.059	LHL
Lower Kai-iwi Shellbed	243	62	20	EXT	Lower_Kai_iwi_62_#20E_Col_2_a	2	34	14	0	0	20	0	16.03.2019	EDM	annotated image available	4.9152	2.391	LHL
Lower Kai-iwi Shellbed	244	62	20	EXT	Lower_Kai_iwi_62_#20E_Col_1_a	1	42	18	0	0	24	0	16.03.2019	EDM	annotated image available	4.9152	1.604	EDM
Lower Kai-iwi Shellbed	245	62	10	EXT	Lower_Kai_iwi_62_#10E_Col_1_a	1	43	27	0	0	16	0	16.03.2019	EDM	annotated image available	4.9152	1.499	LHL
Lower Kai-iwi Shellbed	246	62	7	EXT	Lower_Kai_iwi_62_#7E_Col_1_a	1	41	24	0	0	17	0	16.03.2019	EDM	annotated image available	4.9152	1.967	LHL
Lower Kai-iwi Shellbed	247	61	26	EXT	Lower_Kai_iwi_61_#26E_Col_2_a	2	34	23	1	0	10	0	16.03.2019	EDM	annotated image available	4.9152	1.344	EDM
Lower Kai-iwi Shellbed	248	61	26	EXT	Lower_Kai_iwi_61_#26E_Col_1_a	1	49	29	2	0	18	0	16.03.2019	EDM	annotated image available	4.9152	0.793	LHL
Lower Kai-iwi Shellbed	249	60	19	EXT	Lower_Kai_iwi_60_#19E_Col_1_a	1	38	19	2	0	17	0	16.03.2019	EDM	annotated image available	4.9152	1.818	LHL	EDM corrected
Lower Kai-iwi Shellbed	250	60	13	EXT	Lower_Kai_iwi_60_#13E_Col_1_a	1	31	12	2	0	17	0	16.03.2019	EDM	annotated image available	4.9152	2.536	LHL
Lower Kai-iwi Shellbed	251	60	12	EXT	Lower_Kai_iwi_60_#12E_Col_2_a	2	37	19	0	0	18	0	16.03.2019	EDM	annotated image available	4.9152	1.737	EDM
Lower Kai-iwi Shellbed	252	60	12	EXT	Lower_Kai_iwi_60_#12E_Col_1_a	1	54	25	3	0	26	0	16.03.2019	EDM	annotated image available	4.9152	0.369	EDM
Lower Kai-iwi Shellbed	253	60	8	EXT	Lower_Kai_iwi_60_#8E_Col_2_a	2	32	27	0	0	5	0	16.03.2019	EDM	annotated image available	4.9152	2.595	LHL
Lower Kai-iwi Shellbed	254	60	8	EXT	Lower_Kai_iwi_60_#8E_Col_1_a	1	47	25	3	1	18	0	16.03.2019	EDM	annotated image available	4.9152	1.279	LHL
Lower Kai-iwi Shellbed	255	58	28	EXT	Lower_Kai_iwi_58_#28E_Col_1_a	1	46	24	2	0	20	0	16.03.2019	EDM	annotated image available	4.9152	1.189	EDM
Lower Kai-iwi Shellbed	256	58	17	EXT	Lower_Kai_iwi_58_#17E_Col_1_a	1	25	16	2	0	7	0	16.03.2019	EDM	annotated image available	4.9152	2.692	LHL
Lower Kai-iwi Shellbed	257	58	16	EXT	Lower_Kai_iwi_58_#16E_Col_1_a	1	25	20	4	0	1	0	16.03.2019	EDM	annotated image available	4.9152	2.609	LHL
Shakespeare Cliff Basal Sand Shellbed	258	29	15	INT	SCBSSB_29_#15I_Col_1_a	1	62	46	3	0	13	0	16.03.2019	EDM	annotated image available	4.9152	0.621	EDM
Shakespeare Cliff Basal Sand Shellbed	259	29	15	INT	SCBSSB_29_#15I_Col_1_b	1	55	34	9	0	12	0	16.03.2019	EDM	annotated image available	4.9152	1.112	EDM
Shakespeare Cliff Basal Sand Shellbed	260	29	8	INT	SCBSSB_29_#8I_Col_1_a	1	47	28	6	0	13	0	16.03.2019	EDM	annotated image available	4.9152	0.951	LHL
Shakespeare Cliff Basal Sand Shellbed	261	23	17	INT	SCBSSB_23_#17I_Col_1_a	1	46	22	21	1	2	0	16.03.2019	EDM	annotated image available	4.9152	0.582	LHL
Shakespeare Cliff Basal Sand Shellbed	262	23	13	INT	SCBSSB_23_#13I_Col_4_a	4	55	38	3	0	14	0	16.03.2019	EDM	annotated image available	4.9152	1.031	LHL
Shakespeare Cliff Basal Sand Shellbed	263	23	13	INT	SCBSSB_23_#13I_Col_3_a	3	46	23	18	0	5	0	16.03.2019	EDM	annotated image available	4.9152	1.717	LHL
Shakespeare Cliff Basal Sand Shellbed	264	23	13	INT	SCBSSB_23_#13I_Col_2_a	2	60	40	18	0	2	0	16.03.2019	EDM	annotated image available	4.9152	0.397	LHL
Shakespeare Cliff Basal Sand Shellbed	265	23	13	INT	SCBSSB_23_#13I_Col_1_a	1	60	38	15	0	7	0	16.03.2019	EDM	annotated image available	4.9152	0.495	LHL	EDM corrected
Shakespeare Cliff Basal Sand Shellbed	266	21	25	INT	SCBSSB_21_#25I_Col_2_a	2	40	24	10	0	6	0	16.03.2019	EDM	annotated image available	4.9152	1.65	LHL
Shakespeare Cliff Basal Sand Shellbed	267	21	25	INT	SCBSSB_21_#25I_Col_1_a	1	38	25	8	1	4	0	16.03.2019	EDM	annotated image available	4.9152	1.402	EDM
Shakespeare Cliff Basal Sand Shellbed	268	21	18	INT	SCBSSB_21_#18I_Col_2_a	2	33	23	7	0	3	0	16.03.2019	EDM	annotated image available	4.9152	2.11	EDM
Shakespeare Cliff Basal Sand Shellbed	269	21	18	INT	SCBSSB_21_#18E_Col_1_a	1	28	16	4	0	8	0	16.03.2019	EDM	annotated image available	4.9152	2.823	LHL
Shakespeare Cliff Basal Sand Shellbed	270	21	11	INT	SCBSSB_21_#11I_Col_3_a	3	60	24	0	3	33	0	16.03.2019	EDM	annotated image available	4.9152	0.895	LHL
Shakespeare Cliff Basal Sand Shellbed	271	21	11	INT	SCBSSB_21_#11I_Col_2_a	2	41	24	9	0	8	0	16.03.2019	EDM	annotated image available	4.9152	0.624	EDM
Shakespeare Cliff Basal Sand Shellbed	272	21	11	INT	SCBSSB_21_#11I_Col_1_a	1	53	31	4	0	18	0	16.03.2019	EDM	annotated image available	4.9152	0.975	EDM
Shakespeare Cliff Basal Sand Shellbed	273	21	2	INT	SCBSSB_21_#2I_Col_1_a	1	44	24	10	0	10	0	16.03.2019	EDM	annotated image available	4.9152	1.313	LHL
Shakespeare Cliff Basal Sand Shellbed	274	21	1	INT	SCBSSB_21_#1I_Col_3_a	3	64	39	7	0	18	0	16.03.2019	EDM	annotated image available	4.9152	1.068	EDM
Shakespeare Cliff Basal Sand Shellbed	275	21	1	INT	SCBSSB_21_#1I_Col_2_b	2	63	32	6	0	25	0	16.03.2019	EDM	annotated image available	4.9152	0.896	EDM
Shakespeare Cliff Basal Sand Shellbed	276	21	1	INT	SCBSSB_21_#1I_Col_2_a	2	60	26	8	0	26	0	16.03.2019	EDM	annotated image available	4.9152	0.711	LHL
Shakespeare Cliff Basal Sand Shellbed	277	21	1	INT	SCBSSB_21_#1I_Col_1_a	1	51	34	0	0	17	0	16.03.2019	EDM	annotated image available	4.9152	1.48	LHL
Nukumaru Brown Sand	278	55	19	EXT	NKBS_55_#19E_Col_1_a	1	30	21	2	0	7	0	23.03.2019	EDM	annotated image available	4.9152	2.866	EDM
Nukumaru Brown Sand	279	86	6	INT	NKBS_86_#6I_Col_1_a	1	53	36	2	0	15	0	23.03.2019	EDM	annotated image available	4.9152	1.201	LHL
Nukumaru Brown Sand	280	87	2	EXT	NKBS_87_#2E_Col_1_a	1	67	51	2	0	14	0	23.03.2019	EDM	annotated image available	4.9152	1.117	EDM
Nukumaru Brown Sand	281	87	2	EXT	NKBS_87_#2E_Col_1_b	1	52	39	6	1	6	0	23.03.2019	EDM	annotated image available	4.9152	1.542	EDM
Nukumaru Brown Sand	282	87	8	EXT	NKBS_87_#8E_Col_1_a	1	69	49	0	0	20	0	23.03.2019	EDM	annotated image available	4.9152	0.947	LHL
Nukumaru Brown Sand	283	87	8	EXT	NKBS_87_#8E_Col_2_a	2	40	31	9	0	0	0	23.03.2019	EDM	annotated image available	4.9152	1.723	LHL
Nukumaru Brown Sand	284	87	9	EXT	NKBS_87_#9E_Col_1_a	1	56	45	4	0	7	0	23.03.2019	EDM	annotated image available	4.9152	0.824	LHL
Nukumaru Brown Sand	285	87	11	EXT	NKBS_87_#11E_Col_1_a	1	42	39	0	0	3	0	23.03.2019	EDM	annotated image available	4.9152	1.381	EDM
Nukumaru Brown Sand	286	87	11	EXT	NKBS_87_#11E_Col_1_b	1	44	34	1	0	9	0	23.03.2019	EDM	annotated image available	4.9152	1.861	EDM
Nukumaru Brown Sand	287	87	14	EXT	NKBS_87_#14E_Col_1_a	1	66	52	13	0	1	0	23.03.2019	EDM	annotated image available	4.9152	0.418	LHL
Nukumaru Brown Sand	288	87	14	EXT	NKBS_87_#14E_Col_1_b	1	72	58	11	0	3	0	23.03.2019	EDM	annotated image available	4.9152	0.619	LHL
Nukumaru Brown Sand	289	71	11	INT	NKBS_71_#11I_Col_1_a	1	64	52	0	0	12	0	23.03.2019	EDM	annotated image available	4.9152	0.643	LHL
Nukumaru Brown Sand	290	71	11	INT	NKBS_71_#11I_Col_3_a	3	64	51	0	0	13	0	23.03.2019	EDM	annotated image available	4.9152	0.905	EDM
Nukumaru Brown Sand	291	71	11	INT	NKBS_71_#11I_Col_4_a	4	59	46	2	0	11	0	23.03.2019	EDM	annotated image available	4.9152	0.907	LHL
Nukumaru Brown Sand	292	72	8	INT	NKBS_72_#8I_Col_1_a	1	76	40	2	0	34	0	23.03.2019	EDM	annotated image available	4.9152	0.5	EDM
Nukumaru Brown Sand	293	72	8	INT	NKBS_72_#8I_Col_1_b	1	79	39	5	0	35	0	23.03.2019	EDM	annotated image available	4.9152	0.84	EDM
Nukumaru Brown Sand	294	72	8	INT	NKBS_72_#8I_Col_2_a	2	57	40	0	0	17	0	23.03.2019	EDM	annotated image available	4.9152	1.198	EDM
Nukumaru Brown Sand	295	116	9	INT	NKBS_116_#9I_Col_1_a	1	61	37	18	0	6	0	23.03.2019	EDM	annotated image available	4.9152	0.669	LHL
Nukumaru Brown Sand	296	116	9	INT	NKBS_116_#9I_Col_2_a	2	69	49	4	4	12	0	23.03.2019	EDM	annotated image available	4.9152	0.374	LHL
Nukumaru Brown Sand	297	9.6	10	INT	NKBS_9.6_#10I_Col_2_a	2	53	35	0	0	18	0	23.03.2019	EDM	annotated image available; 2 images a1 and a2 (focus on different zooids)	4.9152	0.936	EDM
Nukumaru Brown Sand	298	9.6	11	EXT	NKBS_9.6_#11E_Col_8_a	8	56	33	12	0	11	0	23.03.2019	EDM	annotated image available	4.9152	1.128	EDM
Nukumaru Brown Sand	299	9.6	11	EXT	NKBS_9.6_#11E_Col_8_b	8	39	18	7	0	14	0	23.03.2019	EDM	annotated image available	4.9152	1.495	LHL
Nukumaru Brown Sand	300	9.6	18	EXT	NKBS_9.6_#18E_Col_6_a	6	63	54	2	0	7	0	23.03.2019	EDM	annotated image available	4.9152	1.483	LHL
Nukumaru Brown Sand	301	9.6	18	EXT	NKBS_9.6_#18E_Col_6_b	6	31	24	1	0	6	0	23.03.2019	EDM	annotated image available	4.9152	3.179	LHL
Nukumaru Brown Sand	302	9.6	18	EXT	NKBS_9.6_#18E_Col_1_a	1	117	76	27	0	14	0	23.03.2019	EDM	annotated image available	4.9152	0.241	LHL
Nukumaru Brown Sand	303	9.6	18	EXT	NKBS_9.6_#18E_Col_1_b	1	100	62	18	0	20	0	23.03.2019	EDM	annotated image available	4.9152	0.762	LHL
Nukumaru Brown Sand	304	9.6	18	EXT	NKBS_9.6_#18E_Col_1_c	1	100	69	22	0	9	0	23.03.2019	EDM	annotated image available	4.9152	0.696	LHL
Nukumaru Brown Sand	305	9.6	18	EXT	NKBS_9.6_#18E_Col_4_a	4	55	41	0	0	14	0	23.03.2019	EDM	annotated image available	4.9152	1.766	LHL
Nukumaru Brown Sand	306	9.6	18	EXT	NKBS_9.6_#18E_Col_2_a	2	45	30	0	0	15	0	23.03.2019	EDM	annotated image available	4.9152	2.053	EDM
Nukumaru Brown Sand	307	9.6	22	EXT	NKBS_9.6_#22E_Col_1_a	1	45	20	23	0	2	0	23.03.2019	EDM	annotated image available	4.9152	1.444	LHL
Nukumaru Brown Sand	308	9.6	25	INT	NKBS_9.6_#25I_Col_9_a	9	29	16	4	0	9	0	23.03.2019	EDM	annotated image available	4.9152	2.764	EDM
Nukumaru Brown Sand	309	9.6	24	INT	NKBS_9.6_#24I_Col_2_a	2	62	42	8	0	12	0	23.03.2019	EDM	annotated image available	4.9152	1.042	EDM
Nukumaru Brown Sand	310	9.6	24	INT	NKBS_9.6_#24I_Col_2_b	2	58	34	9	0	15	0	23.03.2019	EDM	annotated image available	4.9152	0.806	LHL
Nukumaru Brown Sand	311	9.6	24	INT	NKBS_9.6_#24I_Col_2_c	2	36	23	9	0	4	0	23.03.2019	EDM	annotated image available	4.9152	2.275	EDM
Nukumaru Limestone	312	93	15	INT	NKLS_93_#15I_Col_1_a	1	61	39	9	0	13	0	23.03.2019	EDM	annotated image available	4.9152	0.701	LHL
Nukumaru Limestone	313	93	15	INT	NKLS_93_#15I_Col_1_b	1	73	45	23	0	5	0	23.03.2019	EDM	annotated image available	4.9152	0.338	LHL
Nukumaru Limestone	314	94	1	INT	NKLS_94_#1I_Col_1_a	1	57	44	9	0	4	0	23.03.2019	EDM	annotated image available	4.9152	0.806	EDM
Nukumaru Limestone	315	94	1	INT	NKLS_94_#1I_Col_2_a	2	74	60	4	0	10	0	23.03.2019	EDM	annotated image available	4.9152	0.323	LHL
Nukumaru Limestone	316	94	1	INT	NKLS_94_#1I_Col_3_a	3	76	52	9	4	11	0	23.03.2019	EDM	annotated image available	4.9152	0.444	LHL
Nukumaru Limestone	317	94	1	INT	NKLS_94_#1I_Col_4_a	4	41	30	8	0	3	0	23.03.2019	EDM	annotated image available	4.9152	2.701	LHL
Nukumaru Limestone	318	94	1	INT	NKLS_94_#1I_Col_5_a	5	59	52	2	0	5	0	23.03.2019	EDM	annotated image available	4.9152	1.065	LHL
Nukumaru Limestone	319	94	1	INT	NKLS_94_#1E_Col_6_a	6	52	31	16	0	5	0	23.03.2019	EDM	annotated image available	4.9152	1.437	EDM
Nukumaru Limestone	320	94	1	INT	NKLS_94_#1I_Col_7_a	7	69	49	8	0	12	0	23.03.2019	EDM	annotated image available; 2 images a1 and a2 (focus on different zooids)	4.9152	0.398	EDM
Nukumaru Limestone	321	94	9	EXT	NKLS_94_#9E_Col_1_a	1	59	56	0	0	3	0	23.03.2019	EDM	annotated image available; 2 images a1 and a2 (focus on different zooids)	4.9152	1.693	LHL
Nukumaru Limestone	322	94	14	EXT	NKLS_94_#14E_Col_1_a	1	62	46	3	0	13	0	23.03.2019	EDM	annotated image available	4.9152	2.177	EDM
Nukumaru Limestone	323	94	14	EXT	NKLS_94_#14E_Col_2_a	2	53	40	2	0	11	0	23.03.2019	EDM	annotated image available	4.9152	2.182	EDM
Nukumaru Limestone	324	94	15	EXT	NKLS_94_#15E_Col_1_a	1	51	46	0	0	5	0	24.03.2019	EDM	annotated image available	4.9152	1.175	EDM
Nukumaru Limestone	325	94	15	EXT	NKLS_94_#15E_Col_2_a	2	66	52	10	2	2	0	24.03.2019	EDM	annotated image available	4.9152	0.926	LHL
Nukumaru Limestone	326	94	17	EXT	NKLS_94_#17E_Col_1_a	1	77	63	0	0	14	0	24.03.2019	EDM	annotated image available	4.9152	1.028	EDM
Nukumaru Limestone	327	89	1	INT	NKLS_89_#1I_Col_1_a	1	49	28	1	0	20	0	24.03.2019	EDM	annotated image available	4.9152	1.584	EDM
Nukumaru Limestone	328	89	1	INT	NKLS_89_#1I_Col_2_a	2	34	14	4	0	16	0	24.03.2019	EDM	annotated image available	4.9152	2.596	EDM
Nukumaru Limestone	329	89	1	INT	NKLS_89_#1I_Col_2_b	2	51	32	3	1	15	0	24.03.2019	EDM	annotated image available	4.9152	1.07	EDM
Nukumaru Limestone	330	89	1	INT	NKLS_89_#1I_Col_3_a	3	33	23	9	0	1	0	24.03.2019	EDM	annotated image available	4.9152	2.594	EDM
Nukumaru Limestone	331	89	2	EXT	NKLS_89_#2E_Col_1_a	1	36	25	0	0	11	0	24.03.2019	EDM	annotated image available	4.9152	3.227	EDM
Nukumaru Limestone	332	89	12	INT	NKLS_89_#12I_Col_1_a	1	65	44	7	6	8	0	24.03.2019	EDM	annotated image available	4.9152	0.548	LHL
Nukumaru Limestone	333	89	12	INT	NKLS_89_#12I_Col_1_b	1	61	45	0	0	16	0	24.03.2019	EDM	annotated image available	4.9152	0.93	EDM
Nukumaru Limestone	334	89	12	INT	NKLS_89_#12I_Col_2_a	2	73	40	18	0	15	0	24.03.2019	EDM	annotated image available	4.9152	0.15	EDM
Nukumaru Limestone	335	89	12	INT	NKLS_89_#12I_Col_2_b	2	74	40	19	0	15	0	24.03.2019	EDM	annotated image available	4.9152	0.18	EDM
Nukumaru Limestone	336	89	12	EXT	NKLS_89_#12E_Col_5_a	5	68	47	1	2	18	0	24.03.2019	EDM	annotated image available	4.9152	0.422	EDM
Nukumaru Limestone	337	89	16	INT	NKLS_89_#16I_Col_1_a	1	37	28	0	0	9	0	24.03.2019	EDM	annotated image available	4.9152	2.785	LHL
Nukumaru Limestone	338	95	7	INT	NKLS_95_#7I_Col_1_a	1	66	42	22	0	2	0	24.03.2019	EDM	annotated image available	4.9152	0.402	EDM
Nukumaru Limestone	339	95	7	INT	NKLS_95_#7I_Col_2_a	2	58	52	0	0	6	0	24.03.2019	EDM	annotated image available	4.9152	1.338	EDM
Nukumaru Limestone	340	95	7	EXT	NKLS_95_#7E_Col_3_a	3	71	60	0	0	11	0	24.03.2019	EDM	annotated image available	4.9152	0.938	LHL
Nukumaru Limestone	341	9.20	1	INT	NKLS_9.20_#1I_Col_19_a	19	71	43	12	0	16	0	24.03.2019	EDM	annotated image available	4.9152	1.417	EDM
Nukumaru Limestone	342	9.21	1	EXT	NKLS_9.21_#1E_Col_2_a	2	47	29	15	0	3	0	24.03.2019	EDM	annotated image available	4.9152	1.776	EDM
Nukumaru Limestone	343	9.21	1	INT	NKLS_9.21_#1I_Col_4_a	4	69	42	10	0	17	0	24.03.2019	EDM	annotated image available	4.9152	1.035	EDM
Nukumaru Limestone	344	9.21	1	INT	NKLS_9.21_#1I_Col_4_b	4	86	45	16	0	25	0	24.03.2019	EDM	annotated image available	4.9152	0.2	EDM
Nukumaru Limestone	345	9.21	1	INT	NKLS_9.21_#1I_Col_6_a	6	80	63	1	0	16	0	24.03.2019	EDM	annotated image available	4.9152	0.468	LHL
Nukumaru Limestone	346	9.21	1	INT	NKLS_9.21_#1I_Col_7_a	7	61	35	10	0	16	0	24.03.2019	EDM	annotated image available	4.9152	1.211	LHL
Nukumaru Limestone	347	9.21	1	INT	NKLS_9.21_#1I_Col_12_a	12	59	45	5	0	9	0	24.03.2019	EDM	annotated image available	4.9152	1.742	LHL
Nukumaru Limestone	348	33	6	INT	NKLS_33_#6I_Col_1_a	1	44	27	0	0	17	0	24.03.2019	EDM	annotated image available	4.9152	2.419	EDM
Nukumaru Limestone	349	33	15	INT	NKLS_33_#15I_Col_1_a	1	38	23	0	0	15	0	24.03.2019	EDM	annotated image available	4.9152	3.15	LHL
Nukumaru Limestone	350	33	27	INT	NKLS_33_#27I_Col_1_a	1	39	29	0	0	10	0	24.03.2019	EDM	annotated image available	4.9152	2.83	LHL
Nukumaru Limestone	351	9.9	1	INT	NKLS_9.9_#1I_Col_16_a	16	62	37	17	0	8	0	24.03.2019	EDM	annotated image available	4.9152	0.6	EDM
Nukumaru Limestone	352	9.9	1	INT	NKLS_9.9_#1I_Col_12_b	12	74	50	23	0	1	0	24.03.2019	EDM	annotated image available	4.9152	0.33	EDM
Nukumaru Limestone	353	9.9	1	INT	NKLS_9.9_#1I_Col_12_a	12	69	48	17	0	4	0	24.03.2019	EDM	annotated image available	4.9152	0.636	LHL
Nukumaru Limestone	354	42	19	INT	NKLS_42_#19I_Col_1_a	1	76	72	0	0	4	0	24.03.2019	EDM	annotated image available	4.9152	0.5	LHL
Nukumaru Limestone	355	36	10	INT	NKLS_36_#10I_Col_1_a	1	46	41	5	0	0	0	24.03.2019	EDM	annotated image available	4.9152	1.449	EDM
Nukumaru Limestone	356	35	8	EXT	NKLS_35_#8E_Col_1_a	1	70	54	12	3	1	0	24.03.2019	EDM	annotated image available	4.9152	0.653	LHL
Nukumaru Limestone	357	35	7	EXT	NKLS_35_#7E_Col_1_a	1	55	35	10	0	10	0	24.03.2019	EDM	annotated image available; 2 images a1 and a2 (focus on different zooids)	4.9152	1.462	EDM
Nukumaru Limestone	358	34	24	INT	NKLS_34_#24I_Col_1_a	1	59	41	0	0	18	0	24.03.2019	EDM	annotated image available	4.9152	1.503	EDM
Nukumaru Limestone	359	34	17	INT	NKLS_34_#17I_Col_1_a	1	47	46	0	0	1	0	24.03.2019	EDM	annotated image available	4.9152	2.637	LHL	EDM corrected
Nukumaru Limestone	360	34	8	INT	NKLS_34_#8I_Col_1_a	1	66	57	0	0	9	0	24.03.2019	EDM	annotated image available	4.9152	0.991	LHL	EDM corrected
Nukumaru Limestone	361	34	1	EXT	NKLS_34_#1E_Col_1_a	1	46	29	4	0	13	0	24.03.2019	EDM	annotated image available	4.9152	1.786	EDM
Nukumaru Limestone	362	42	15	EXT	NKLS_42_#15E_Col_1_a	1	42	36	0	0	6	0	24.03.2019	EDM	annotated image available	4.9152	2.608	LHL
Nukumaru Limestone	363	42	7	EXT	NKLS_42_#7E_Col_1_a	1	77	55	2	2	18	0	24.03.2019	EDM	annotated image available	4.9152	0.721	LHL
Nukumaru Limestone	364	42	6	EXT	NKLS_42_#6E_Col_2_a	2	56	35	21	0	0	0	24.03.2019	EDM	annotated image available	4.9152	1.183	LHL	EDM corrected
Nukumaru Limestone	365	42	6	EXT	NKLS_42_#6E_Col_1_b	1	71	52	13	0	6	0	24.03.2019	EDM	annotated image available	4.9152	0.936	LHL
Nukumaru Limestone	366	42	6	EXT	NKLS_42_#6E_Col_1_a	1	55	47	4	0	4	0	24.03.2019	EDM	annotated image available	4.9152	1.912	EDM
Nukumaru Limestone	367	53	1	INT	NKLS_42_#2I_Col_1_a	1	59	48	0	0	11	0	25.03.2019	EDM	annotated image available	4.9152	1.502	LHL
Nukumaru Limestone	368	53	5	EXT	NKLS_53_#5E_Col_1_a	1	29	22	7	0	0	0	25.03.2019	EDM	annotated image available	4.9152	2.835	LHL
Nukumaru Limestone	369	53	22	EXT	NKLS_53_#22E_Col_1_a	1	44	38	0	1	5	0	25.03.2019	EDM	annotated image available	4.9152	1.867	LHL
Nukumaru Limestone	370	53	22	EXT	NKLS_53_#22E_Col_2_a	2	58	36	11	0	11	0	25.03.2019	EDM	annotated image available	4.9152	1.474	EDM
Nukumaru Limestone	371	46	6	INT	NKLS_46_#6I_Col_1_a	1	99	74	1	0	24	0	25.03.2019	EDM	annotated image available	4.9152	0.382	LHL
Lower Kai-iwi Shellbed	372	9.153	1	EXT	Lower_Kai_iwi_9.153_#1E_Col_1_a	1	47	25	2	0	20	0	28.03.2019	EDM	annotated image available	4.9152	0.796	LHL
Lower Kai-iwi Shellbed	373	9.98	1	EXT	Lower_Kai_iwi_9.98_#1E_Col_1_a	1	50	20	2	0	28	0	28.03.2019	EDM	annotated image available	4.9152	0.543	LHL
Lower Kai-iwi Shellbed	374	9.98	1	EXT	Lower_Kai_iwi_9.98_#1E_Col_1_b	1	29	18	0	0	11	0	28.03.2019	EDM	annotated image available	4.9152	2.484	LHL
Lower Kai-iwi Shellbed	375	9.98	3	EXT	Lower_Kai_iwi_9.98_#3E_Col_1_a	1	42	33	0	0	9	0	28.03.2019	EDM	annotated image available	4.9152	1.25	EDM
Lower Kai-iwi Shellbed	376	9.98	3	EXT	Lower_Kai_iwi_9.98_#3E_Col_1_b	1	36	16	1	0	19	0	28.03.2019	EDM	annotated image available	4.9152	1.91	LHL
Lower Kai-iwi Shellbed	377	9.98	3	EXT	Lower_Kai_iwi_9.98_#3E_Col_2_a	2	29	15	0	0	14	0	28.03.2019	EDM	annotated image available	4.9152	2.65	EDM
Lower Kai-iwi Shellbed	378	9.98	8	EXT	Lower_Kai_iwi_9.98_#8E_Col_1_a	1	24	15	0	0	9	0	28.03.2019	EDM	annotated image available	4.9152	2.71	EDM
Lower Kai-iwi Shellbed	379	9.152	1	EXT	Lower_Kai_iwi_9.152_#1E_Col_1_a	1	29	22	3	0	4	0	28.03.2019	EDM	annotated image available	4.9152	1.608	EDM
Lower Kai-iwi Shellbed	380	9.152	5	EXT	Lower_Kai_iwi_9.152_#5E_Col_1_a	1	46	25	3	0	18	0	28.03.2019	EDM	annotated image available	4.9152	0.97	LHL
Lower Kai-iwi Shellbed	381	9.152	11	EXT	Lower_Kai_iwi_9.152_#11E_Col_1_a	1	41	15	2	0	24	0	28.03.2019	EDM	annotated image available	4.9152	1.275	EDM
Lower Kai-iwi Shellbed	382	9.152	46	EXT	Lower_Kai_iwi_9.152_#46E_Col_1_a	1	41	24	2	0	15	0	28.03.2019	EDM	annotated image available	4.9152	1.079	LHL
Lower Kai-iwi Shellbed	383	9.152	48	EXT	Lower_Kai_iwi_9.152_#48E_Col_1_a	1	42	22	1	0	19	0	28.03.2019	EDM	annotated image available	4.9152	1.234	EDM
Lower Kai-iwi Shellbed	384	9.152	50	INT	Lower_Kai_iwi_9.152_#50I_Col_1_a	1	45	29	0	0	15	1	28.03.2019	EDM	annotated image available	4.9152	1.438	EDM
Lower Kai-iwi Shellbed	385	9.152	57	EXT	Lower_Kai_iwi_9.152_#57E_Col_1_a	1	55	27	3	0	25	0	28.03.2019	EDM	annotated image available	4.9152	0.47	EDM
Lower Kai-iwi Shellbed	386	9.152	64	EXT	Lower_Kai_iwi_9.152_#64E_Col_1_a	1	50	21	6	0	23	0	28.03.2019	EDM	annotated image available	4.9152	0.573	LHL
Lower Kai-iwi Shellbed	387	9.152	64	EXT	Lower_Kai_iwi_9.152_#64E_Col_1_b	1	35	17	10	0	8	0	28.03.2019	EDM	annotated image available	4.9152	1.064	EDM
Lower Kai-iwi Shellbed	388	9.152	64	EXT	Lower_Kai_iwi_9.152_#64E_Col_1_c	1	42	19	7	3	13	0	28.03.2019	EDM	annotated image available	4.9152	0.966	LHL
Lower Kai-iwi Shellbed	389	9.152	64	EXT	Lower_Kai_iwi_9.152_#64E_Col_1_d	1	57	26	5	0	26	0	28.03.2019	EDM	annotated image available	4.9152	0.636	EDM
Lower Kai-iwi Shellbed	390	9.152	65	EXT	Lower_Kai_iwi_9.152_#65E_Col_1_a	1	37	23	2	2	10	0	28.03.2019	EDM	annotated image available	4.9152	1.506	LHL
Lower Kai-iwi Shellbed	391	9.152	76	EXT	Lower_Kai_iwi_9.152_#76E_Col_1_a	1	39	25	7	0	7	0	28.03.2019	EDM	annotated image available	4.9152	0.909	EDM
Lower Kai-iwi Shellbed	392	9.152	88	EXT	Lower_Kai_iwi_9.152_#88E_Col_1_a	1	45	25	4	0	16	0	28.03.2019	EDM	annotated image available	4.9152	1.134	LHL
Lower Kai-iwi Shellbed	393	9.152	88	EXT	Lower_Kai_iwi_9.152_#88E_Col_1_b	1	22	11	2	0	9	0	01.04.2019	EDM	annotated image available	4.9152	2.809	EDM
Lower Kai-iwi Shellbed	394	9.152	92	EXT	Lower_Kai_iwi_9.152_#92E_Col_1_a	1	36	25	3	0	8	0	01.04.2019	EDM	annotated image available	4.9152	1.043	LHL
Lower Kai-iwi Shellbed	395	9.152	102	EXT	Lower_Kai_iwi_9.152_#102E_Col_1_a	1	46	27	4	0	15	0	01.04.2019	EDM	annotated image available	4.9152	0.844	EDM
Lower Kai-iwi Shellbed	396	9.152	104	EXT	Lower_Kai_iwi_9.152_#104E_Col_1_a	1	37	19	9	0	9	0	01.04.2019	EDM	annotated image available	4.9152	1.409	EDM
Upper Kai-iwi Shellbed	397	9.127	6	INT	Upper_Kai_iwi_9.127_#6I_Col_1_a	1	27	19	0	0	8	0	02.04.2019	EDM	annotated image available	4.9152	2.901	EDM
Upper Kai-iwi Shellbed	398	9.148	54	EXT	Upper_Kai_iwi_9.148_#54E_Col_1_a	1	56	39	1	0	16	0	02.04.2019	EDM	annotated image available	4.9152	1.052	EDM
Upper Kai-iwi Shellbed	399	9.148	130	EXT	Upper_Kai_iwi_9.148_#130E_Col_1_a	1	33	25	6	0	2	0	02.04.2019	EDM	annotated image available	4.9152	1.743	EDM
Landguard Formation	400	120	11	INT	Landguard_120_#11I_Col_1_a	1	39	28	0	0	11	0	02.04.2019	EDM	annotated image available	4.9152	2.437	LHL
Landguard Formation	401	120	11	INT	Landguard_120_#11I_Col_1_b	1	33	19	2	0	12	0	02.04.2019	EDM	annotated image available	4.9152	2.688	EDM
Landguard Formation	402	120	13	INT	Landguard_120_#13I_Col_1_a	1	27	21	2	0	4	0	02.04.2019	EDM	annotated image available	4.9152	2.927	LHL
Upper Kai-iwi Shellbed	403	9.127	123	INT	Upper_Kai_iwi_9.127_#123I_Col_1_a	1	16	8	4	0	4	0	03.04.2019	EDM	annotated image available	4.9152	3.55	EDM
Upper Kai-iwi Shellbed	404	9.127	123	INT	Upper_Kai_iwi_9.127_#123I_Col_1_b	1	45	23	1	1	20	0	03.04.2019	EDM	annotated image available	4.9152	1.712	EDM
Upper Kai-iwi Shellbed	405	9.127	123	INT	Upper_Kai_iwi_9.127_#123I_Col_1_c	1	26	10	2	0	14	0	03.04.2019	EDM	annotated image available	4.9152	3.183	LHL
Upper Kai-iwi Shellbed	406	9.127	129	EXT	Upper_Kai_iwi_9.127_#129E_Col_1_a	1	57	39	12	0	6	0	03.04.2019	EDM	annotated image available; 3 images a1, a2, a3 (focus on different zooids)	4.9152	1.183	LHL
Upper Kai-iwi Shellbed	407	9.127	129	EXT	Upper_Kai_iwi_9.127_#129E_Col_1_b	1	61	40	3	1	17	0	03.04.2019	EDM	annotated image available	4.9152	0.504	EDM
Upper Kai-iwi Shellbed	408	9.127	129	EXT	Upper_Kai_iwi_9.127_#129E_Col_2_a	2	42	28	1	0	13	0	03.04.2019	EDM	annotated image available	4.9152	1.772	EDM
Shakespeare Cliff Basal Sand Shellbed	409	9.69	8	INT	SCBSSB_9.69_#8I_Col_1_a	1	68	35	30	0	3	0	04.04.2019	EDM	annotated image available	4.9152	0.378	EDM
Shakespeare Cliff Basal Sand Shellbed	410	9.69	8	INT	SCBSSB_9.69_#8I_Col_1_b	1	64	32	19	1	12	0	04.04.2019	EDM	annotated image available	4.9152	0.293	EDM
Shakespeare Cliff Basal Sand Shellbed	411	9.69	8	INT	SCBSSB_9.69_#8I_Col_1_c	1	63	38	21	0	4	0	04.04.2019	EDM	annotated image available	4.9152	0.128	EDM
Shakespeare Cliff Basal Sand Shellbed	412	9.69	2	EXT	SCBSSB_9.69_#2E_Col_1_a	1	51	32	3	4	12	0	04.04.2019	EDM	annotated image available	4.9152	0.957	LHL
Shakespeare Cliff Basal Sand Shellbed	413	9.69	2	EXT	SCBSSB_9.69_#2E_Col_2_a	2	50	33	2	0	15	0	04.04.2019	EDM	annotated image available	4.9152	0.917	LHL
Shakespeare Cliff Basal Sand Shellbed	414	9.69	2	EXT	SCBSSB_9.69_#2E_Col_3_a	3	44	28	4	0	12	0	04.04.2019	EDM	annotated image available	4.9152	1.254	LHL
Shakespeare Cliff Basal Sand Shellbed	415	9.69	8	INT	SCBSSB_9.69_#8I_Col_2_a	2	62	33	26	0	3	0	04.04.2019	EDM	annotated image available	4.9152	0.374	LHL
Shakespeare Cliff Basal Sand Shellbed	416	9.69	8	INT	SCBSSB_9.69_#8I_Col_2_b	2	62	37	19	0	6	0	04.04.2019	EDM	annotated image available	4.9152	0.553	EDM
Shakespeare Cliff Basal Sand Shellbed	417	9.69	12	INT	SCBSSB_9.69_#12I_Col_1_a	1	52	26	10	2	14	0	04.04.2019	EDM	annotated image available	4.9152	0.867	LHL
Shakespeare Cliff Basal Sand Shellbed	418	9.69	12	INT	SCBSSB_9.69_#12I_Col_1_b	1	61	37	8	0	16	0	04.04.2019	EDM	annotated image available	4.9152	0.536	LHL
Shakespeare Cliff Basal Sand Shellbed	419	9.69	12	INT	SCBSSB_9.69_#12I_Col_3_a	3	49	31	6	0	12	0	04.04.2019	EDM	annotated image available	4.9152	0.574	LHL
Shakespeare Cliff Basal Sand Shellbed	420	9.69	12	INT	SCBSSB_9.69_#12I_Col_3_b	3	54	27	12	0	15	0	04.04.2019	EDM	annotated image available	4.9152	0.606	LHL	EDM corrected
Shakespeare Cliff Basal Sand Shellbed	421	9.69	12	INT	SCBSSB_9.69_#12I_Col_4_a	4	56	47	1	0	8	0	04.04.2019	EDM	annotated image available	4.9152	0.303	LHL
Shakespeare Cliff Basal Sand Shellbed	422	9.69	12	INT	SCBSSB_9.69_#12I_Col_5_a	5	59	35	6	0	18	0	04.04.2019	EDM	annotated image available	4.9152	0.556	LHL
Shakespeare Cliff Basal Sand Shellbed	423	9.69	54	INT	SCBSSB_9.69_#54I_Col_1_a	1	51	26	5	0	20	0	05.04.2019	EDM	annotated image available	4.9152	0.97	EDM
Shakespeare Cliff Basal Sand Shellbed	424	9.69	54	INT	SCBSSB_9.69_#54I_Col_2_a	2	58	43	6	0	9	0	05.04.2019	EDM	annotated image available	4.9152	0.476	EDM
Shakespeare Cliff Basal Sand Shellbed	425	9.69	54	INT	SCBSSB_9.69_#54I_Col_3_a	3	57	33	9	1	14	0	05.04.2019	EDM	annotated image available	4.9152	0.427	EDM
Shakespeare Cliff Basal Sand Shellbed	426	9.69	54	INT	SCBSSB_9.69_#54I_Col_3_b	3	36	28	4	0	4	0	05.04.2019	EDM	annotated image available	4.9152	1.861	LHL
Shakespeare Cliff Basal Sand Shellbed	427	9.69	55	INT	SCBSSB_9.69_#55I_Col_1_a	1	58	26	32	0	0	0	05.04.2019	EDM	annotated image available	4.9152	0.687	EDM
Shakespeare Cliff Basal Sand Shellbed	428	9.69	55	INT	SCBSSB_9.69_#55I_Col_1_b	1	62	37	22	0	3	0	05.04.2019	EDM	annotated image available; 2 images b1, b2 (focus on different zooids) only one annotated	4.9152	0.352	LHL
Shakespeare Cliff Basal Sand Shellbed	429	9.69	55	INT	SCBSSB_9.69_#55I_Col_2_a	2	45	26	0	2	17	0	05.04.2019	EDM	annotated image available	4.9152	1.665	EDM
Shakespeare Cliff Basal Sand Shellbed	430	9.69	55	INT	SCBSSB_9.69_#55I_Col_3_a	3	46	22	9	1	14	0	05.04.2019	EDM	annotated image available	4.9152	1.92	EDM
Shakespeare Cliff Basal Sand Shellbed	431	9.115	1	EXT	SCBSSB_9.115_#1E_Col_1_a	1	66	34	14	6	12	0	05.04.2019	EDM	annotated image available	4.9152	0.373	LHL
Shakespeare Cliff Basal Sand Shellbed	432	9.115	1	EXT	SCBSSB_9.115_#1E_Col_1_b	1	55	39	5	0	11	0	05.04.2019	EDM	annotated image available	4.9152	0.93	EDM
Shakespeare Cliff Basal Sand Shellbed	433	9.115	1	EXT	SCBSSB_9.115_#1E_Col_2_a	2	65	46	9	0	10	0	05.04.2019	EDM	annotated image available	4.9152	0.724	LHL
Shakespeare Cliff Basal Sand Shellbed	434	9.115	1	EXT	SCBSSB_9.115_#1E_Col_2_b	2	54	38	3	1	12	0	05.04.2019	EDM	annotated image available	4.9152	1.469	EDM
Shakespeare Cliff Basal Sand Shellbed	435	9.115	1	EXT	SCBSSB_9.115_#1E_Col_3_a	3	62	43	7	0	12	0	05.04.2019	EDM	annotated image available	4.9152	0.392	LHL
Shakespeare Cliff Basal Sand Shellbed	436	9.115	1	INT	SCBSSB_9.115_#1I_Col_4_a	4	57	36	8	0	13	0	05.04.2019	EDM	annotated image available	4.9152	0.772	LHL
Shakespeare Cliff Basal Sand Shellbed	437	9.115	3	INT	SCBSSB_9.115_#3I_Col_1_a	1	61	25	25	4	7	0	05.04.2019	EDM	annotated image available	4.9152	0.42	EDM
Shakespeare Cliff Basal Sand Shellbed	438	9.115	3	INT	SCBSSB_9.115_#3I_Col_1_b	1	70	34	26	1	9	0	05.04.2019	EDM	annotated image available	4.9152	0.609	LHL	EDM corrected
Shakespeare Cliff Basal Sand Shellbed	439	9.115	3	INT	SCBSSB_9.115_#3I_Col_1_c	1	63	23	29	4	7	0	05.04.2019	EDM	annotated image available	4.9152	0.254	EDM
Shakespeare Cliff Basal Sand Shellbed	440	9.115	3	INT	SCBSSB_9.115_#3I_Col_2_a	2	49	36	0	0	13	0	05.04.2019	EDM	annotated image available	4.9152	1.012	EDM
Shakespeare Cliff Basal Sand Shellbed	441	9.115	3	INT	SCBSSB_9.115_#3I_Col_2_b	2	64	43	8	0	13	0	05.04.2019	EDM	annotated image available	4.9152	0.184	EDM
Shakespeare Cliff Basal Sand Shellbed	442	9.115	3	EXT	SCBSSB_9.115_#3E_Col_3_a	3	39	38	0	0	1	0	05.04.2019	EDM	annotated image available	4.9152	1.488	LHL
Shakespeare Cliff Basal Sand Shellbed	443	9.115	3	EXT	SCBSSB_9.115_#3E_Col_4_a	4	47	31	12	0	4	0	05.04.2019	EDM	annotated image available	4.9152	0.938	LHL	EDM corrected
Shakespeare Cliff Basal Sand Shellbed	444	9.115	4	EXT	SCBSSB_9.115_#4E_Col_1_a	1	59	48	6	0	5	0	05.04.2019	EDM	annotated image available	4.9152	0.437	LHL
Shakespeare Cliff Basal Sand Shellbed	445	9.115	4	EXT	SCBSSB_9.115_#4E_Col_1_b	1	55	41	10	0	4	0	05.04.2019	EDM	annotated image available	4.9152	1.023	LHL
Shakespeare Cliff Basal Sand Shellbed	446	9.115	4	EXT	SCBSSB_9.115_#4E_Col_1_c	1	44	23	8	0	13	0	05.04.2019	EDM	annotated image available	4.9152	2.243	EDM
Shakespeare Cliff Basal Sand Shellbed	447	9.115	4	INT	SCBSSB_9.115_#4I_Col_2_a	2	70	31	26	0	13	0	05.04.2019	EDM	annotated image available	4.9152	0.243	LHL	EDM corrected
Shakespeare Cliff Basal Sand Shellbed	448	9.115	4	INT	SCBSSB_9.115_#4I_Col_2_b	2	73	33	16	0	24	0	05.04.2019	EDM	annotated image available	4.9152	0.421	LHL	EDM corrected
Shakespeare Cliff Basal Sand Shellbed	449	9.115	4	INT	SCBSSB_9.115_#4I_Col_2_c	2	62	31	8	0	23	0	05.04.2019	EDM	annotated image available	4.9152	0.34	EDM
Shakespeare Cliff Basal Sand Shellbed	450	9.115	4	INT	SCBSSB_9.115_#4I_Col_2_d	2	63	38	15	0	10	0	05.04.2019	EDM	annotated image available	4.9152	0.532	EDM
Shakespeare Cliff Basal Sand Shellbed	451	9.115	6	EXT	SCBSSB_9.115_#6E_Col_1_a	1	60	35	16	0	9	0	05.04.2019	EDM	annotated image available	4.9152	0.453	LHL
Shakespeare Cliff Basal Sand Shellbed	452	9.115	6	EXT	SCBSSB_9.115_#6E_Col_2_a	2	65	40	12	0	13	0	05.04.2019	EDM	annotated image available	4.9152	0.669	EDM
Shakespeare Cliff Basal Sand Shellbed	453	9.115	6	EXT	SCBSSB_9.115_#6E_Col_3_a	3	42	35	3	0	4	0	05.04.2019	EDM	annotated image available	4.9152	1.857	EDM
Shakespeare Cliff Basal Sand Shellbed	454	9.115	6	EXT	SCBSSB_9.115_#6E_Col_4_a	4	61	29	19	0	13	0	05.04.2019	EDM	annotated image available	4.9152	0.258	LHL
Shakespeare Cliff Basal Sand Shellbed	455	9.115	6	INT	SCBSSB_9.115_#6I_Col_5_a	5	60	44	6	0	10	0	05.04.2019	EDM	annotated image available	4.9152	0.47	EDM
Shakespeare Cliff Basal Sand Shellbed	456	9.115	6	INT	SCBSSB_9.115_#6I_Col_5_b	5	60	43	3	0	14	0	05.04.2019	EDM	annotated image available	4.9152	0.678	EDM
Shakespeare Cliff Basal Sand Shellbed	457	9.115	6	INT	SCBSSB_9.115_#6I_Col_5_c	5	65	41	15	0	9	0	05.04.2019	EDM	annotated image available	4.9152	0.369	LHL
Shakespeare Cliff Basal Sand Shellbed	458	9.115	6	INT	SCBSSB_9.115_#6I_Col_5_d	5	78	46	14	1	17	0	05.04.2019	EDM	annotated image available	4.9152	0.358	LHL
Shakespeare Cliff Basal Sand Shellbed	459	9.115	9	INT	SCBSSB_9.115_#9I_Col_1_a	1	73	41	29	0	3	0	05.04.2019	EDM	annotated image available	4.9152	0.143	LHL
Shakespeare Cliff Basal Sand Shellbed	460	9.115	9	INT	SCBSSB_9.115_#9I_Col_1_b	1	56	38	3	0	15	0	05.04.2019	EDM	annotated image available	4.9152	0.424	LHL	EDM corrected
Shakespeare Cliff Basal Sand Shellbed	461	9.115	10	INT	SCBSSB_9.115_#10I_Col_1_a	1	69	38	22	0	9	0	05.04.2019	EDM	annotated image available	4.9152	0.682	EDM
Shakespeare Cliff Basal Sand Shellbed	462	9.115	10	INT	SCBSSB_9.115_#10I_Col_2_a	2	61	34	13	2	12	0	06.04.2019	EDM	annotated image available	4.9152	0.681	LHL
Shakespeare Cliff Basal Sand Shellbed	463	9.115	16	INT	SCBSSB_9.115_#16I_Col_1_a	1	43	24	15	0	4	0	06.04.2019	EDM	annotated image available	4.9152	1.887	LHL
Shakespeare Cliff Basal Sand Shellbed	464	9.115	17	INT	SCBSSB_9.115_#17E_Col_1_a	1	70	52	5	0	13	0	06.04.2019	EDM	annotated image available	4.9152	0.414	LHL
Shakespeare Cliff Basal Sand Shellbed	465	9.115	25	INT	SCBSSB_9.115_#25I_Col_1_a	1	62	23	0	0	39	0	06.04.2019	EDM	annotated image available	4.9152	1.182	LHL
Shakespeare Cliff Basal Sand Shellbed	466	9.115	30	INT	SCBSSB_9.115_#30I_Col_1_b	1	66	36	17	0	13	0	06.04.2019	EDM	annotated image available	4.9152	1.109	LHL
Shakespeare Cliff Basal Sand Shellbed	467	9.115	30	INT	SCBSSB_9.115_#30I_Col_2_a	2	54	37	11	0	6	0	06.04.2019	EDM	annotated image available	4.9152	1.416	LHL
Shakespeare Cliff Basal Sand Shellbed	468	9.115	30	INT	SCBSSB_9.115_#30I_Col_3_a	3	70	35	33	0	2	0	06.04.2019	EDM	annotated image available	4.9152	0.273	LHL	EDM corrected
Shakespeare Cliff Basal Sand Shellbed	469	9.115	33	INT	SCBSSB_9.115_#33I_Col_1_a	1	63	41	0	0	22	0	06.04.2019	EDM	annotated image available	4.9152	0.733	EDM
Shakespeare Cliff Basal Sand Shellbed	470	9.115	33	EXT	SCBSSB_9.115_#33E_Col_3_a	3	63	32	15	0	16	0	06.04.2019	EDM	annotated image available	4.9152	0.758	EDM
Shakespeare Cliff Basal Sand Shellbed	471	9.115	33	EXT	SCBSSB_9.115_#33E_Col_5_a	5	51	27	12	0	12	0	06.04.2019	EDM	annotated image available	4.9152	1.295	LHL	EDM corrected
Shakespeare Cliff Basal Sand Shellbed	472	9.115	33	EXT	SCBSSB_9.115_#33E_Col_7_a	7	61	36	13	0	12	0	06.04.2019	EDM	annotated image available	4.9152	1.051	LHL
Shakespeare Cliff Basal Sand Shellbed	473	9.115	33	EXT	SCBSSB_9.115_#33E_Col_9_a	9	58	38	15	0	5	0	06.04.2019	EDM	annotated image available	4.9152	0.537	EDM
Nukumaru Limestone	474	53	1	INT	NKLS_53_#1I_Col_1_a	1	84	45	0	0	39	0	07.04.2019	EDM	annotated image available	4.9152	1.021	LHL
Nukumaru Limestone	475	46	6	INT	NKLS_46_#6I_Col_2_a	2	62	41	11	0	10	0	07.04.2019	EDM	annotated image available	4.9152	1.075	LHL
Nukumaru Limestone	476	45	4	INT	NKLS_45_#4I_Col_1_a	1	62	31	11	0	20	0	07.04.2019	EDM	annotated image available	4.9152	0.567	EDM
Nukumaru Limestone	477	45	4	INT	NKLS_45_#4I_Col_1_b	1	69	35	16	0	18	0	07.04.2019	EDM	annotated image available	4.9152	0.653	EDM
Nukumaru Limestone	478	45	15	INT	NKLS_45_#15I_Col_1_a	1	78	31	19	0	28	0	07.04.2019	EDM	annotated image available	4.9152	0.353	EDM
Nukumaru Limestone	479	45	15	INT	NKLS_45_#15I_Col_1_b	1	66	20	15	0	31	0	07.04.2019	EDM	annotated image available	4.9152	0.863	LHL
Nukumaru Limestone	480	45	15	INT	NKLS_45_#15I_Col_1_c	1	76	22	26	2	26	0	07.04.2019	EDM	annotated image available	4.9152	0.269	LHL
Nukumaru Limestone	481	45	15	INT	NKLS_45_#15I_Col_2_a	2	73	46	16	0	11	0	07.04.2019	EDM	annotated image available	4.9152	0.567	EDM
Nukumaru Limestone	482	45	15	INT	NKLS_45_#15I_Col_2_b	2	43	28	13	0	2	0	07.04.2019	EDM	annotated image available	4.9152	2.201	EDM
Nukumaru Limestone	483	45	15	INT	NKLS_45_#15I_Col_3_a	3	67	50	10	0	7	0	07.04.2019	EDM	annotated image available; 2 images a1, a2 (focus on different zooids) only one annotated	4.9152	0.654	LHL
Nukumaru Limestone	484	45	15	INT	NKLS_45_#15I_Col_4_a	4	65	45	6	0	14	0	07.04.2019	EDM	annotated image available	4.9152	0.468	EDM
Nukumaru Limestone	485	45	15	INT	NKLS_45_#15I_Col_4_b	4	64	43	12	1	8	0	07.04.2019	EDM	annotated image available	4.9152	0.237	EDM
Nukumaru Limestone	486	52	18	EXT	NKLS_52_#18E_Col_3_a	3	55	55	0	0	0	0	07.04.2019	EDM	annotated image available	4.9152	2.138	LHL
Nukumaru Limestone	487	50	1	INT	NKLS_50_#1I_Col_1_a	1	66	38	20	0	8	0	07.04.2019	EDM	annotated image available	4.9152	0.631	EDM
Nukumaru Limestone	488	51	10	INT	NKLS_51_#10I_Col_1_a	1	43	38	0	0	5	0	07.04.2019	EDM	annotated image available	4.9152	2.064	EDM
Nukumaru Limestone	489	50	1	INT	NKLS_50_#1I_Col_4_a	4	61	43	9	0	9	0	07.04.2019	EDM	annotated image available	4.9152	0.972	EDM
Nukumaru Limestone	490	50	10	INT	NKLS_50_#10I_Col_1_a	1	64	51	2	0	11	0	07.04.2019	EDM	annotated image available	4.9152	1.062	EDM
Nukumaru Limestone	491	50	20	INT	NKLS_50_#20I_Col_1_a	1	34	28	4	0	2	0	07.04.2019	EDM	annotated image available	4.9152	2.338	LHL
Nukumaru Limestone	492	49	14	EXT	NKLS_49_#14E_Col_3_a	3	69	66	0	0	3	0	07.04.2019	EDM	annotated image available	4.9152	0.993	EDM
Nukumaru Limestone	493	39	20	INT	NKLS_39_#20I_Col_1_a	1	69	42	8	0	19	0	07.04.2019	EDM	annotated image available	4.9152	0.844	EDM
Nukumaru Limestone	494	52	18	EXT	NKLS_52_#18E_Col_1_c	1	61	31	25	1	4	0	07.04.2019	EDM	annotated image available	4.9152	1.266	LHL
Nukumaru Limestone	495	52	6	EXT	NKLS_52_#6E_Col_1_a	1	64	39	18	0	7	0	07.04.2019	EDM	annotated image available	4.9152	0.877	EDM
Nukumaru Limestone	496	52	6	EXT	NKLS_52_#6E_Col_4_a	4	50	32	18	0	0	0	07.04.2019	EDM	annotated image available	4.9152	1.701	EDM
Nukumaru Limestone	497	52	18	EXT	NKLS_52_#18E_Col_1_b	1	72	48	19	2	3	0	07.04.2019	EDM	annotated image available	4.9152	0.537	LHL
Nukumaru Limestone	498	52	18	EXT	NKLS_52_#18E_Col_1_a	1	77	51	21	2	3	0	07.04.2019	EDM	annotated image available	4.9152	0.664	EDM
Nukumaru Brown Sand	499	9.80	37	INT	NKBS_9.80_#37I_Col_1_a	1	46	41	0	0	5	0	08.04.2019	EDM	annotated image available	4.9152	1.515	LHL
Nukumaru Brown Sand	500	9.51	3	INT	NKBS_9.51_#3I_Col_1_a	1	87	53	22	0	12	0	08.04.2019	EDM	annotated image available	4.9152	0.4	LHL
Nukumaru Brown Sand	501	9.52	17	EXT	NKBS_9.52_#17E_Col_1_a	1	22	20	0	0	2	0	08.04.2019	EDM	annotated image available	4.9152	3.614	LHL
Nukumaru Brown Sand	502	9.52	35	EXT	NKBS_9.52_#35E_Col_1_a	1	84	56	0	0	28	0	08.04.2019	EDM	annotated image available	4.9152	0.549	EDM
Nukumaru Brown Sand	503	9.52	35	EXT	NKBS_9.52_#35E_Col_1_b	1	48	31	5	0	12	0	08.04.2019	EDM	annotated image available	4.9152	1.823	LHL
Nukumaru Brown Sand	504	9.52	35	EXT	NKBS_9.52_#35E_Col_1_c	1	41	25	8	0	8	0	08.04.2019	EDM	annotated image available	4.9152	2.209	EDM
Landguard Formation	505	121	3	INT	Landguard_121_#3I_Col_1_a	1	63	61	0	0	2	0	09.04.2019	EDM	annotated image available	4.9152	1.786	EDM
Landguard Formation	506	119	21	INT	Landguard_119_#21I_Col_1_a	1	36	32	4	0	0	0	09.04.2019	EDM	annotated image available	4.9152	2.106	EDM
Landguard Formation	507	119	21	INT	Landguard_119_#21I_Col_2_a	2	52	23	11	1	17	0	09.04.2019	EDM	annotated image available	4.9152	1.899	EDM
Landguard Formation	508	118	1	INT	Landguard_118_#1I_Col_1_a	1	20	17	0	0	3	0	09.04.2019	EDM	annotated image available	4.9152	3.689	LHL
Landguard Formation	509	119	15	EXT	Landguard_119_#15E_Col_1_a	1	40	34	1	0	5	0	09.04.2019	EDM	annotated image available; 2 images a1, a2 (focus on different zooids) annotated	4.9152	1.947	EDM
Landguard Formation	510	116	21	INT	Landguard_119_#21I_Col_2_b	2	34	24	6	0	4	0	09.04.2019	EDM	annotated image available; 2 images b1, b2 (focus on different zooids) annotated	4.9152	3.338	LHL
Upper Kai-iwi Shellbed	511	9.128	26	EXT	Upper_Kai_iwi_9.128_#26E_Col_1_a	1	62	25	22	0	15	0	10.04.2019	EDM	annotated image available	4.9152	0.547	LHL
Nukumaru Brown Sand	512	9.118	5	INT	NKBS_9.118_#5I_Col_1_a	1	60	33	18	0	9	0	10.04.2019	EDM	annotated image available	4.9152	0.987	EDM
Nukumaru Brown Sand	513	9.118	5	INT	NKBS_9.118_#5I_Col_1_b	1	33	23	9	0	1	0	10.04.2019	EDM	annotated image available	4.9152	2.878	EDM
Upper Kai-iwi Shellbed	514	9.191	14	EXT	Upper_Kai_iwi_9.191_#14E_Col_1_a	1	39	24	11	0	4	0	10.04.2019	EDM	annotated image available	4.9152	2.104	LHL
Upper Kai-iwi Shellbed	515	9.191	23	INT	Upper_Kai_iwi_9.191_#23I_Col_1_a	1	47	30	0	1	16	0	10.04.2019	EDM	annotated image available	4.9152	1.401	LHL
Upper Kai-iwi Shellbed	516	9.191	30	INT	Upper_Kai_iwi_9.191_#30I_Col_1_a	1	42	22	3	0	17	0	10.04.2019	EDM	annotated image available	4.9152	2.024	LHL
Upper Kai-iwi Shellbed	517	9.191	44	EXT	Upper_Kai_iwi_9.191_#44E_Col_1_a	1	58	36	7	0	15	0	10.04.2019	EDM	annotated image available	4.9152	1.217	LHL
Upper Kai-iwi Shellbed	518	9.191	63	EXT	Upper_Kai_iwi_9.191_#63E_Col_1_a	1	40	25	1	0	14	0	10.04.2019	EDM	annotated image available	4.9152	2.132	LHL
Upper Kai-iwi Shellbed	519	9.191	69	EXT	Upper_Kai_iwi_9.191_#69E_Col_1_a	1	52	28	4	0	20	0	10.04.2019	EDM	annotated image available	4.9152	0.874	EDM
Upper Kai-iwi Shellbed	520	9.191	69	EXT	Upper_Kai_iwi_9.191_#69E_Col_1_b	1	35	24	7	0	4	0	10.04.2019	EDM	annotated image available	4.9152	1.686	EDM
Upper Kai-iwi Shellbed	521	9.191	89	INT	Upper_Kai_iwi_9.191_#89I_Col_1_a	1	30	21	8	0	1	0	10.04.2019	EDM	annotated image available	4.9152	2.64	LHL	EDM corrected
Nukumaru Brown Sand	522	9.136	4	EXT	NKBS_9.136_#4E_Col_1_a	1	35	25	7	0	3	0	11.04.2019	EDM	annotated image available	4.9152	2.595	LHL
Nukumaru Brown Sand	523	9.136	4	EXT	NKBS_9.136_#4E_Col_1_b	1	44	25	12	0	7	0	11.04.2019	EDM	annotated image available	4.9152	1.968	EDM
Nukumaru Brown Sand	524	9.136	4	INT	NKBS_9.136_#4I_Col_3_a	3	77	48	1	1	27	0	11.04.2019	EDM	annotated image available	4.9152	0.385	EDM
Nukumaru Brown Sand	525	9.136	4	INT	NKBS_9.136_#4I_Col_3_b	3	64	38	7	0	19	0	11.04.2019	EDM	annotated image available	4.9152	0.622	EDM
Nukumaru Brown Sand	526	9.136	4	INT	NKBS_9.136_#4I_Col_3_c	3	73	45	4	0	24	0	11.04.2019	EDM	annotated image available	4.9152	0.524	LHL
Nukumaru Brown Sand	527	9.136	7	INT	NKBS_9.136_#7I_Col_1_a	1	29	16	0	0	13	0	11.04.2019	EDM	annotated image available	4.9152	2.847	EDM
Upper Kai-iwi Shellbed	528	9.191	119	EXT	Upper_Kai_iwi_9.191_#119E_Col_1_a	1	29	21	0	0	8	0	11.04.2019	EDM	annotated image available	4.9152	2.354	EDM
Upper Kai-iwi Shellbed	529	9.191	122	EXT	Upper_Kai_iwi_9.191_#122E_Col_1_a	1	21	13	0	0	8	0	11.04.2019	EDM	annotated image available	4.9152	3.184	EDM
Upper Kai-iwi Shellbed	530	9.191	130	EXT	Upper_Kai_iwi_9.191_#130E_Col_1_a	1	30	21	1	0	8	0	11.04.2019	EDM	annotated image available	4.9152	3.077	LHL
Upper Kai-iwi Shellbed	531	9.191	130	EXT	Upper_Kai_iwi_9.191_#130E_Col_1_b	1	44	28	6	0	10	0	11.04.2019	EDM	annotated image available	4.9152	1.976	EDM
Upper Kai-iwi Shellbed	532	9.191	130	EXT	Upper_Kai_iwi_9.191_#130E_Col_1_c	1	39	21	2	0	16	0	11.04.2019	EDM	annotated image available	4.9152	2.104	LHL
Upper Kai-iwi Shellbed	533	9.191	138	EXT	Upper_Kai_iwi_9.191_#138E_Col_1_a	1	60	37	16	0	7	0	11.04.2019	EDM	annotated image available	4.9152	0.605	EDM
Upper Kai-iwi Shellbed	534	9.191	138	EXT	Upper_Kai_iwi_9.191_#138E_Col_1_b	1	56	33	8	0	15	0	11.04.2019	EDM	annotated image available	4.9152	1.171	LHL
Upper Kai-iwi Shellbed	535	9.191	138	EXT	Upper_Kai_iwi_9.191_#138E_Col_1_c	1	40	21	14	0	5	0	11.04.2019	EDM	annotated image available	4.9152	1.614	LHL	EDM corrected
Upper Kai-iwi Shellbed	536	9.191	148	EXT	Upper_Kai_iwi_9.191_#148E_Col_1_a	1	48	32	3	0	13	0	11.04.2019	EDM	annotated image available	4.9152	1.517	LHL
Nukumaru Brown Sand	537	9.134	1	EXT	NKBS_9.134_#1E_Col_1_a	1	44	35	1	0	8	0	12.04.2019	EDM	annotated image available; 2 images a1, a2 (focus on different zooids) annotated	4.9152	1.827	LHL	EDM corrected
Nukumaru Brown Sand	538	9.134	1	EXT	NKBS_9.134_#1E_Col_1_c	1	38	31	0	0	7	0	12.04.2019	EDM	annotated image available	4.9152	2.125	EDM
Nukumaru Brown Sand	539	9.134	1	EXT	NKBS_9.134_#1E_Col_1_b	1	66	54	0	0	12	0	12.04.2019	EDM	annotated image available	4.9152	0.665	EDM
Landguard Formation	540	118	19	INT	Landguard_118_#19I_Col_2_a	2	52	36	7	2	7	0	07.05.2019	EDM	annotated image available	4.9152	1.694	LHL
Landguard Formation	541	118	19	INT	Landguard_118_#19I_Col_1_a	1	63	43	12	0	8	0	07.05.2019	EDM	annotated image available	4.9152	0.967	LHL
Landguard Formation	542	118	18	INT	Landguard_118_#18I_Col_2_a	2	33	20	3	0	10	0	07.05.2019	EDM	annotated image available	4.9152	2.962	LHL
Landguard Formation	543	118	18	INT	Landguard_118_#18I_Col_2_b	2	42	30	1	0	11	0	07.05.2019	EDM	annotated image available	4.9152	2.161	EDM
Landguard Formation	544	118	18	INT	Landguard_118_#18I_Col_1_a	1	50	32	0	1	17	0	07.05.2019	EDM	annotated image available	4.9152	2.146	LHL
Landguard Formation	545	118	18	EXT	Landguard_118_#18E_Col_3_b	3	65	51	6	0	8	0	07.05.2019	EDM	annotated image available	4.9152	0.628	EDM
Landguard Formation	546	118	18	EXT	Landguard_118_#18E_Col_3_a	3	63	54	2	0	7	0	07.05.2019	EDM	annotated image available	4.9152	0.285	EDM
Landguard Formation	547	118	15	EXT	Landguard_118_#15E_Col_1_a	1	49	28	6	0	15	0	07.05.2019	EDM	annotated image available	4.9152	1.273	EDM
Landguard Formation	548	118	11	INT	Landguard_118_#11I_Col_1_a	1	63	38	5	0	20	0	07.05.2019	EDM	annotated image available	4.9152	0.793	EDM
Landguard Formation	549	118	6	EXT	Landguard_118_#6E_Col_1_a	1	55	50	0	0	5	0	07.05.2019	EDM	annotated image available; 2 images a1, a2 (focus on different zooids) annotated	4.9152	2.662	LHL
Landguard Formation	550	118	5	INT	Landguard_118_#5I_Col_2_a	2	56	41	10	2	3	0	07.05.2019	EDM	annotated image available; 2 images a1, a2 (focus on different zooids) annotated	4.9152	1.113	EDM
Landguard Formation	551	118	5	INT	Landguard_118_#5I_Col_1_a	1	54	45	1	0	8	0	07.05.2019	EDM	annotated image available	4.9152	1.049	EDM
Landguard Formation	552	118	4	INT	Landguard_118_#4I_Col_2_a	2	74	38	12	0	24	0	07.05.2019	EDM	annotated image available	4.9152	1.173	LHL
Landguard Formation	553	118	4	INT	Landguard_118_#4I_Col_1_b	1	74	55	1	0	18	0	07.05.2019	EDM	annotated image available	4.9152	0.358	EDM
Landguard Formation	554	118	4	INT	Landguard_118_#4I_Col_1_a	1	61	35	16	0	10	0	07.05.2019	EDM	annotated image available	4.9152	1.185	EDM
Landguard Formation	555	117	34	EXT	Landguard_117_#34E_Col_2_a	2	56	38	7	0	11	0	07.05.2019	EDM	annotated image available	4.9152	1.223	LHL
Landguard Formation	556	117	34	EXT	Landguard_117_#34E_Col_1_a	1	69	37	13	2	17	0	07.05.2019	EDM	annotated image available	4.9152	0.801	LHL
Landguard Formation	557	117	1	INT	Landguard_117_#1I_Col_1_a	1	54	41	5	4	4	0	07.05.2019	EDM	annotated image available	4.9152	1.139	EDM
Nukumaru Brown Sand	558	9.76	7	INT	NKBS_9.76_#7I_Col_1_a	1	44	21	3	1	19	0	08.05.2019	EDM	annotated image available	4.9152	1.781	EDM
Nukumaru Brown Sand	559	9.76	7	INT	NKBS_9.76_#7I_Col_1_b	1	51	33	0	0	18	0	08.05.2019	EDM	annotated image available	4.9152	2.035	LHL

## Sheet: Measurements_all 2
Formation_name	Measurement_section_ID	Sample_ID	Shell_ID	INT_EXT	Image_ID	Colony_ID	Zooid_ID	Zooid_length	Zooid_width	Orifice_length	Orifice_width	Ovicell_length	Ovicell_width	Female_orifice_length	Female_orifice_width	Male_length	Male_width	Male_Orifice_length	Male_Orifice_width	Date	Person	Notes
Nukumaru Limestone	1	9.8	6	INT	NKLS_9.8_#6I_Col_11_a	11	2	NA	NA	NA	NA	198	209	NA	NA	NA	NA	NA	NA	20.02.2019	EDM
Nukumaru Limestone	2	9.8	6	INT	NKLS_9.8_#6I_Col_11_a	11	4	NA	NA	NA	NA	230	210	NA	NA	NA	NA	NA	NA	20.02.2019	EDM
Nukumaru Limestone	3	9.8	6	INT	NKLS_9.8_#6I_Col_11_a	11	1	NA	NA	NA	NA	224	216	38	82	NA	NA	NA	NA	20.02.2019	EDM
Nukumaru Limestone	4	9.8	6	INT	NKLS_9.8_#6I_Col_11_a	11	6	NA	NA	NA	NA	204	198	39	77	NA	NA	NA	NA	20.02.2019	EDM
Nukumaru Limestone	5	9.8	6	INT	NKLS_9.8_#6I_Col_11_a	11	7	NA	NA	NA	NA	197	203	NA	NA	NA	NA	NA	NA	20.02.2019	EDM
Nukumaru Limestone	6	9.8	6	INT	NKLS_9.8_#6I_Col_11_a	11	13	NA	NA	NA	NA	220	192	NA	NA	NA	NA	NA	NA	20.02.2019	EDM
Nukumaru Limestone	7	9.8	6	INT	NKLS_9.8_#6I_Col_11_a	11	10	NA	NA	NA	NA	220	196	36	77	NA	NA	NA	NA	20.02.2019	EDM
Nukumaru Limestone	8	9.8	6	INT	NKLS_9.8_#6I_Col_11_a	11	9	NA	NA	NA	NA	189	196	NA	NA	NA	NA	NA	NA	20.02.2019	EDM
Nukumaru Limestone	9	9.8	6	INT	NKLS_9.8_#6I_Col_11_a	11	15	NA	NA	NA	NA	174	174	44	78	NA	NA	NA	NA	20.02.2019	EDM
Nukumaru Limestone	10	9.8	6	INT	NKLS_9.8_#6I_Col_11_a	11	17	NA	NA	NA	NA	203	188	34	74	NA	NA	NA	NA	20.02.2019	EDM
Nukumaru Limestone	11	9.8	6	INT	NKLS_9.8_#6I_Col_11_a	11	18	NA	NA	NA	NA	198	214	NA	NA	NA	NA	NA	NA	20.02.2019	EDM
Nukumaru Limestone	12	9.8	6	INT	NKLS_9.8_#6I_Col_11_a	11	14	NA	NA	NA	NA	211	198	NA	NA	NA	NA	NA	NA	20.02.2019	EDM
Nukumaru Limestone	13	9.8	6	INT	NKLS_9.8_#6I_Col_11_a	11	16	NA	NA	NA	NA	218	188	NA	NA	NA	NA	NA	NA	20.02.2019	EDM
Nukumaru Limestone	14	9.8	6	INT	NKLS_9.8_#6I_Col_11_a	11	25	NA	NA	52	62	NA	NA	NA	NA	NA	NA	NA	NA	20.02.2019	EDM
Nukumaru Limestone	15	9.8	6	INT	NKLS_9.8_#6I_Col_11_a	11	23	NA	NA	58	60	NA	NA	NA	NA	NA	NA	NA	NA	20.02.2019	EDM
Nukumaru Limestone	16	9.8	6	INT	NKLS_9.8_#6I_Col_11_a	11	27	NA	NA	52	60	NA	NA	NA	NA	NA	NA	NA	NA	20.02.2019	EDM
Nukumaru Limestone	17	9.8	6	INT	NKLS_9.8_#6I_Col_11_a	11	19	NA	NA	52	64	NA	NA	NA	NA	NA	NA	NA	NA	20.02.2019	EDM
Nukumaru Limestone	18	9.8	6	INT	NKLS_9.8_#6I_Col_11_a	11	22	NA	NA	52	60	NA	NA	NA	NA	NA	NA	NA	NA	20.02.2019	EDM
Nukumaru Limestone	19	9.8	6	INT	NKLS_9.8_#6I_Col_11_a	11	30	NA	NA	55	58	NA	NA	NA	NA	NA	NA	NA	NA	20.02.2019	EDM
Nukumaru Limestone	20	9.8	8	INT	NKLS_9.8_#8I_Col_8_a	8	7	NA	NA	NA	NA	200	216	NA	NA	NA	NA	NA	NA	20.02.2019	EDM
Nukumaru Limestone	21	9.8	8	INT	NKLS_9.8_#8I_Col_8_a	8	1	NA	NA	NA	NA	155	225	42	73	NA	NA	NA	NA	20.02.2019	EDM
Nukumaru Limestone	22	9.8	8	INT	NKLS_9.8_#8I_Col_8_a	8	2	NA	NA	NA	NA	170	206	40	73	NA	NA	NA	NA	20.02.2019	EDM
Nukumaru Limestone	23	9.8	8	INT	NKLS_9.8_#8I_Col_8_a	8	3	NA	NA	NA	NA	139	222	38	79	NA	NA	NA	NA	20.02.2019	EDM
Nukumaru Limestone	24	9.8	8	INT	NKLS_9.8_#8I_Col_8_a	8	6	NA	NA	NA	NA	167	239	34	71	NA	NA	NA	NA	20.02.2019	EDM
Nukumaru Limestone	25	9.8	8	INT	NKLS_9.8_#8I_Col_8_a	8	8	NA	NA	NA	NA	172	205	36	73	NA	NA	NA	NA	20.02.2019	EDM
Nukumaru Limestone	26	9.8	8	INT	NKLS_9.8_#8I_Col_8_a	8	22	335	166	NA	NA	NA	NA	NA	NA	NA	NA	NA	NA	20.02.2019	EDM
Nukumaru Limestone	27	9.8	8	INT	NKLS_9.8_#8I_Col_8_a	8	16	337	143	NA	NA	NA	NA	NA	NA	NA	NA	NA	NA	20.02.2019	EDM
Nukumaru Limestone	28	9.8	8	INT	NKLS_9.8_#8I_Col_8_a	8	17	417	161	NA	NA	NA	NA	NA	NA	NA	NA	NA	NA	20.02.2019	EDM
Nukumaru Limestone	29	9.8	8	INT	NKLS_9.8_#8I_Col_8_a	8	18	366	141	NA	NA	NA	NA	NA	NA	NA	NA	NA	NA	20.02.2019	EDM
Nukumaru Limestone	30	9.8	8	INT	NKLS_9.8_#8I_Col_8_a	8	11	368	149	NA	NA	NA	NA	NA	NA	NA	NA	NA	NA	20.02.2019	EDM
Nukumaru Limestone	31	9.8	8	INT	NKLS_9.8_#8I_Col_8_a	8	13	NA	NA	57	61	NA	NA	NA	NA	NA	NA	NA	NA	20.02.2019	EDM
Nukumaru Limestone	32	9.8	15	INT	NKLS_9.8_#15I_Col_9_a	9	24	449	146	58	54	NA	NA	NA	NA	NA	NA	NA	NA	20.02.2019	EDM
Nukumaru Limestone	33	9.8	15	INT	NKLS_9.8_#15I_Col_9_a	9	29	410	155	NA	NA	NA	NA	NA	NA	NA	NA	NA	NA	20.02.2019	EDM
Nukumaru Limestone	34	9.8	15	INT	NKLS_9.8_#15I_Col_9_a	9	42	NA	NA	51	51	NA	NA	NA	NA	NA	NA	NA	NA	20.02.2019	EDM
Nukumaru Limestone	35	9.8	15	INT	NKLS_9.8_#15I_Col_9_a	9	46	NA	NA	59	49	NA	NA	NA	NA	NA	NA	NA	NA	20.02.2019	EDM
Nukumaru Limestone	36	9.8	15	INT	NKLS_9.8_#15I_Col_9_a	9	36	352	185	NA	NA	NA	NA	NA	NA	NA	NA	NA	NA	20.02.2019	EDM
Nukumaru Limestone	37	9.8	15	INT	NKLS_9.8_#15I_Col_9_a	9	20	376	150	NA	NA	NA	NA	NA	NA	NA	NA	NA	NA	20.02.2019	EDM
Nukumaru Limestone	38	9.8	15	INT	NKLS_9.8_#15I_Col_9_a	9	31	364	180	52	67	NA	NA	NA	NA	NA	NA	NA	NA	20.02.2019	EDM
Nukumaru Limestone	39	9.8	15	INT	NKLS_9.8_#15I_Col_9_a	9	22	NA	NA	59	55	NA	NA	NA	NA	NA	NA	NA	NA	20.02.2019	EDM
Nukumaru Limestone	40	9.8	15	INT	NKLS_9.8_#15I_Col_9_a	9	25	385	169	NA	NA	NA	NA	NA	NA	NA	NA	NA	NA	20.02.2019	EDM
Nukumaru Limestone	41	9.8	15	INT	NKLS_9.8_#15I_Col_9_b	9	1	NA	NA	NA	NA	176	218	NA	NA	NA	NA	NA	NA	20.02.2019	EDM
Nukumaru Limestone	42	9.8	15	INT	NKLS_9.8_#15I_Col_9_b	9	5	NA	NA	NA	NA	206	234	NA	NA	NA	NA	NA	NA	20.02.2019	EDM
Nukumaru Limestone	43	9.8	15	INT	NKLS_9.8_#15I_Col_9_b	9	3	NA	NA	NA	NA	180	243	NA	NA	NA	NA	NA	NA	20.02.2019	EDM
Nukumaru Limestone	44	9.8	15	INT	NKLS_9.8_#15I_Col_9_b	9	2	NA	NA	NA	NA	221	241	NA	NA	NA	NA	NA	NA	20.02.2019	EDM
Nukumaru Limestone	45	9.8	15	INT	NKLS_9.8_#15I_Col_9_b	9	4	NA	NA	NA	NA	220	192	NA	NA	NA	NA	NA	NA	20.02.2019	EDM
Nukumaru Limestone	46	9.8	15	INT	NKLS_9.8_#15I_Col_9_b	9	27	388	166	NA	NA	NA	NA	NA	NA	NA	NA	NA	NA	20.02.2019	EDM
Nukumaru Limestone	47	9.8	15	INT	NKLS_9.8_#15I_Col_9_b	9	29	426	158	63	56	NA	NA	NA	NA	NA	NA	NA	NA	20.02.2019	EDM
Nukumaru Limestone	48	9.8	15	INT	NKLS_9.8_#15I_Col_9_b	9	25	406	172	NA	NA	NA	NA	NA	NA	NA	NA	NA	NA	20.02.2019	EDM
Nukumaru Limestone	49	9.8	15	INT	NKLS_9.8_#15I_Col_9_b	9	45	363	175	NA	NA	NA	NA	NA	NA	NA	NA	NA	NA	20.02.2019	EDM
Nukumaru Limestone	50	9.8	15	INT	NKLS_9.8_#15I_Col_9_b	9	24	NA	NA	56	58	NA	NA	NA	NA	NA	NA	NA	NA	20.02.2019	EDM
Nukumaru Limestone	51	9.8	15	INT	NKLS_9.8_#15I_Col_9_b	9	37	NA	NA	53	60	NA	NA	NA	NA	NA	NA	NA	NA	20.02.2019	EDM
Nukumaru Limestone	52	9.8	15	INT	NKLS_9.8_#15I_Col_9_b	9	36	NA	NA	59	54	NA	NA	NA	NA	NA	NA	NA	NA	20.02.2019	EDM
Nukumaru Limestone	53	9.8	15	INT	NKLS_9.8_#15I_Col_9_b	9	26	NA	NA	57	49	NA	NA	NA	NA	NA	NA	NA	NA	20.02.2019	EDM
Nukumaru Limestone	54	9.8	16	EXT	NKLS_9.8_#16E_Col_1_a	1	2	NA	NA	NA	NA	167	194	54	83	NA	NA	NA	NA	21.02.2019	EDM
Nukumaru Limestone	55	9.8	16	EXT	NKLS_9.8_#16E_Col_1_a	1	1	NA	NA	NA	NA	203	255	NA	NA	NA	NA	NA	NA	21.02.2019	EDM
Nukumaru Limestone	56	9.8	16	EXT	NKLS_9.8_#16E_Col_1_a	1	13	NA	NA	NA	NA	187	215	NA	NA	NA	NA	NA	NA	21.02.2019	EDM
Nukumaru Limestone	57	9.8	16	EXT	NKLS_9.8_#16E_Col_1_a	1	12	NA	NA	NA	NA	195	185	49	69	NA	NA	NA	NA	21.02.2019	EDM
Nukumaru Limestone	58	9.8	16	EXT	NKLS_9.8_#16E_Col_1_a	1	3	NA	NA	NA	NA	200	214	52	76	NA	NA	NA	NA	21.02.2019	EDM
Nukumaru Limestone	59	9.8	16	EXT	NKLS_9.8_#16E_Col_1_a	1	8	NA	NA	NA	NA	178	217	56	81	NA	NA	NA	NA	21.02.2019	EDM
Nukumaru Limestone	60	9.8	16	EXT	NKLS_9.8_#16E_Col_1_a	1	50	NA	NA	61	56	NA	NA	NA	NA	NA	NA	NA	NA	21.02.2019	EDM
Nukumaru Limestone	61	9.8	16	EXT	NKLS_9.8_#16E_Col_1_a	1	49	347	135	63	65	NA	NA	NA	NA	NA	NA	NA	NA	21.02.2019	EDM
Nukumaru Limestone	62	9.8	16	EXT	NKLS_9.8_#16E_Col_1_a	1	52	NA	NA	54	65	NA	NA	NA	NA	NA	NA	NA	NA	21.02.2019	EDM
Nukumaru Limestone	63	9.8	16	EXT	NKLS_9.8_#16E_Col_1_a	1	53	343	171	66	63	NA	NA	NA	NA	NA	NA	NA	NA	21.02.2019	EDM
Nukumaru Limestone	64	9.8	16	EXT	NKLS_9.8_#16E_Col_1_a	1	25	NA	NA	68	64	NA	NA	NA	NA	NA	NA	NA	NA	21.02.2019	EDM
Nukumaru Limestone	65	9.8	16	EXT	NKLS_9.8_#16E_Col_1_a	1	46	364	153	NA	NA	NA	NA	NA	NA	NA	NA	NA	NA	21.02.2019	EDM
Nukumaru Limestone	66	9.8	16	EXT	NKLS_9.8_#16E_Col_1_a	1	55	310	122	NA	NA	NA	NA	NA	NA	NA	NA	NA	NA	21.02.2019	EDM
Nukumaru Limestone	67	9.8	16	EXT	NKLS_9.8_#16E_Col_1_a	1	36	369	144	NA	NA	NA	NA	NA	NA	NA	NA	NA	NA	21.02.2019	EDM
Nukumaru Limestone	68	9.8	16	EXT	NKLS_9.8_#16E_Col_1_a	1	45	370	128	NA	NA	NA	NA	NA	NA	NA	NA	NA	NA	21.02.2019	EDM
Nukumaru Limestone	69	9.8	18	EXT	NKLS_9.8_#18E_Col_1_a	1	19	NA	NA	70	61	NA	NA	NA	NA	NA	NA	NA	NA	21.02.2019	EDM
Nukumaru Limestone	70	9.8	18	EXT	NKLS_9.8_#18E_Col_1_a	1	29	365	165	61	61	NA	NA	NA	NA	NA	NA	NA	NA	21.02.2019	EDM
Nukumaru Limestone	71	9.8	18	EXT	NKLS_9.8_#18E_Col_1_a	1	18	NA	NA	61	63	NA	NA	NA	NA	NA	NA	NA	NA	21.02.2019	EDM
Nukumaru Limestone	72	9.8	18	EXT	NKLS_9.8_#18E_Col_1_a	1	6	375	161	69	57	NA	NA	NA	NA	NA	NA	NA	NA	21.02.2019	EDM
Nukumaru Limestone	73	9.8	18	EXT	NKLS_9.8_#18E_Col_1_a	1	38	367	165	NA	NA	NA	NA	NA	NA	NA	NA	NA	NA	21.02.2019	EDM
Nukumaru Limestone	74	9.8	18	EXT	NKLS_9.8_#18E_Col_1_a	1	34	402	172	NA	NA	NA	NA	NA	NA	NA	NA	NA	NA	21.02.2019	EDM
Nukumaru Limestone	75	9.8	18	EXT	NKLS_9.8_#18E_Col_1_a	1	35	447	171	NA	NA	NA	NA	NA	NA	NA	NA	NA	NA	21.02.2019	EDM
Nukumaru Limestone	76	9.8	18	EXT	NKLS_9.8_#18E_Col_1_a	1	28	369	164	NA	NA	NA	NA	NA	NA	NA	NA	NA	NA	21.02.2019	EDM
Nukumaru Limestone	77	9.8	18	INT	NKLS_9.8_#18I_Col_1_a	1	2	NA	NA	NA	NA	159	238	NA	NA	NA	NA	NA	NA	21.02.2019	EDM
Nukumaru Limestone	78	9.8	18	INT	NKLS_9.8_#18I_Col_1_a	1	1	NA	NA	NA	NA	188	236	NA	NA	NA	NA	NA	NA	21.02.2019	EDM
Nukumaru Limestone	79	9.8	18	INT	NKLS_9.8_#18I_Col_1_a	1	6	NA	NA	NA	NA	155	236	NA	NA	NA	NA	NA	NA	21.02.2019	EDM
Nukumaru Limestone	80	9.8	18	INT	NKLS_9.8_#18I_Col_1_a	1	63	NA	NA	66	58	NA	NA	NA	NA	NA	NA	NA	NA	21.02.2019	EDM
Nukumaru Limestone	81	9.8	18	INT	NKLS_9.8_#18I_Col_1_a	1	65	NA	NA	52	52	NA	NA	NA	NA	NA	NA	NA	NA	21.02.2019	EDM
Nukumaru Limestone	82	9.8	18	INT	NKLS_9.8_#18I_Col_1_a	1	50	NA	NA	60	57	NA	NA	NA	NA	NA	NA	NA	NA	21.02.2019	EDM
Nukumaru Limestone	83	9.8	18	INT	NKLS_9.8_#18I_Col_1_a	1	36	NA	NA	56	52	NA	NA	NA	NA	NA	NA	NA	NA	21.02.2019	EDM
Nukumaru Limestone	84	9.8	18	INT	NKLS_9.8_#18I_Col_1_a	1	35	NA	NA	58	50	NA	NA	NA	NA	NA	NA	NA	NA	21.02.2019	EDM
Nukumaru Limestone	85	9.8	18	INT	NKLS_9.8_#18I_Col_1_a	1	39	NA	NA	51	53	NA	NA	NA	NA	NA	NA	NA	NA	21.02.2019	EDM
Nukumaru Limestone	86	9.8	18	INT	NKLS_9.8_#18I_Col_1_b	1	4	NA	NA	NA	NA	208	231	NA	NA	NA	NA	NA	NA	21.02.2019	EDM
Nukumaru Limestone	87	9.8	18	INT	NKLS_9.8_#18I_Col_1_b	1	3	NA	NA	NA	NA	180	228	32	58	NA	NA	NA	NA	21.02.2019	EDM
Nukumaru Limestone	88	9.8	18	INT	NKLS_9.8_#18I_Col_1_b	1	6	NA	NA	NA	NA	177	227	NA	NA	NA	NA	NA	NA	21.02.2019	EDM
Nukumaru Limestone	89	9.8	18	INT	NKLS_9.8_#18I_Col_1_b	1	7	NA	NA	NA	NA	175	203	NA	NA	NA	NA	NA	NA	21.02.2019	EDM
Nukumaru Limestone	90	9.8	18	INT	NKLS_9.8_#18I_Col_1_b	1	8	NA	NA	NA	NA	171	242	27	67	NA	NA	NA	NA	21.02.2019	EDM
Nukumaru Limestone	91	9.8	18	INT	NKLS_9.8_#18I_Col_1_b	1	9	NA	NA	NA	NA	185	242	35	74	NA	NA	NA	NA	21.02.2019	EDM
Nukumaru Limestone	92	9.8	18	INT	NKLS_9.8_#18I_Col_1_b	1	10	NA	NA	NA	NA	168	218	36	70	NA	NA	NA	NA	21.02.2019	EDM
Nukumaru Limestone	93	9.8	18	INT	NKLS_9.8_#18I_Col_1_b	1	11	NA	NA	NA	NA	178	266	NA	NA	NA	NA	NA	NA	21.02.2019	EDM
Nukumaru Limestone	94	9.8	18	INT	NKLS_9.8_#18I_Col_1_b	1	13	NA	NA	NA	NA	159	219	43	75	NA	NA	NA	NA	21.02.2019	EDM
Nukumaru Limestone	95	9.8	18	INT	NKLS_9.8_#18I_Col_1_b	1	44	405	173	66	64	NA	NA	NA	NA	NA	NA	NA	NA	21.02.2019	EDM
Nukumaru Limestone	96	9.8	18	INT	NKLS_9.8_#18I_Col_1_b	1	43	376	167	NA	NA	NA	NA	NA	NA	NA	NA	NA	NA	21.02.2019	EDM
Nukumaru Limestone	97	9.8	18	INT	NKLS_9.8_#18I_Col_1_b	1	46	NA	NA	67	69	NA	NA	NA	NA	NA	NA	NA	NA	21.02.2019	EDM
Nukumaru Limestone	98	9.8	18	INT	NKLS_9.8_#18I_Col_1_b	1	45	NA	NA	65	71	NA	NA	NA	NA	NA	NA	NA	NA	21.02.2019	EDM
Nukumaru Limestone	99	9.8	18	INT	NKLS_9.8_#18I_Col_1_b	1	38	NA	NA	65	67	NA	NA	NA	NA	NA	NA	NA	NA	21.02.2019	EDM
Nukumaru Limestone	100	9.8	18	INT	NKLS_9.8_#18I_Col_1_b	1	41	NA	NA	63	55	NA	NA	NA	NA	NA	NA	NA	NA	21.02.2019	EDM
Nukumaru Limestone	101	9.8	18	INT	NKLS_9.8_#18I_Col_1_b	1	20	NA	NA	61	62	NA	NA	NA	NA	NA	NA	NA	NA	21.02.2019	EDM
Nukumaru Limestone	102	9.8	18	INT	NKLS_9.8_#18I_Col_1_b	1	25	NA	NA	58	58	NA	NA	NA	NA	NA	NA	NA	NA	21.02.2019	EDM
Nukumaru Limestone	103	9.8	18	INT	NKLS_9.8_#18I_Col_4_a	4	3	NA	NA	NA	NA	173	229	NA	NA	NA	NA	NA	NA	21.02.2019	EDM
Nukumaru Limestone	104	9.8	18	INT	NKLS_9.8_#18I_Col_4_a	4	1	NA	NA	NA	NA	185	256	NA	NA	NA	NA	NA	NA	21.02.2019	EDM
Nukumaru Limestone	105	9.8	18	INT	NKLS_9.8_#18I_Col_4_a	4	8	NA	NA	NA	NA	184	232	30	73	NA	NA	NA	NA	21.02.2019	EDM
Nukumaru Limestone	106	9.8	18	INT	NKLS_9.8_#18I_Col_4_a	4	5	NA	NA	NA	NA	175	234	35	78	NA	NA	NA	NA	21.02.2019	EDM
Nukumaru Limestone	107	9.8	18	INT	NKLS_9.8_#18I_Col_4_a	4	10	NA	NA	NA	NA	211	240	NA	NA	NA	NA	NA	NA	21.02.2019	EDM
Nukumaru Limestone	108	9.8	18	INT	NKLS_9.8_#18I_Col_4_a	4	9	NA	NA	NA	NA	184	229	NA	NA	NA	NA	NA	NA	21.02.2019	EDM
Nukumaru Limestone	109	9.8	18	INT	NKLS_9.8_#18I_Col_4_a	4	11	NA	NA	NA	NA	147	208	NA	NA	NA	NA	NA	NA	21.02.2019	EDM
Nukumaru Limestone	110	9.8	18	INT	NKLS_9.8_#18I_Col_4_a	4	14	NA	NA	NA	NA	192	236	40	74	NA	NA	NA	NA	21.02.2019	EDM
Nukumaru Limestone	111	9.8	18	INT	NKLS_9.8_#18I_Col_4_a	4	13	NA	NA	NA	NA	195	226	NA	NA	NA	NA	NA	NA	21.02.2019	EDM
Nukumaru Limestone	112	9.8	18	INT	NKLS_9.8_#18I_Col_4_a	4	12	NA	NA	NA	NA	184	226	NA	NA	NA	NA	NA	NA	21.02.2019	EDM
Nukumaru Limestone	113	9.8	18	INT	NKLS_9.8_#18I_Col_4_a	4	15	NA	NA	NA	NA	162	213	NA	NA	NA	NA	NA	NA	21.02.2019	EDM
Nukumaru Limestone	114	9.8	18	INT	NKLS_9.8_#18I_Col_4_a	4	56	NA	NA	65	63	NA	NA	NA	NA	NA	NA	NA	NA	21.02.2019	EDM
Nukumaru Limestone	115	9.8	18	INT	NKLS_9.8_#18I_Col_4_a	4	52	NA	NA	56	59	NA	NA	NA	NA	NA	NA	NA	NA	21.02.2019	EDM
Nukumaru Limestone	116	9.8	18	INT	NKLS_9.8_#18I_Col_4_a	4	48	NA	NA	61	61	NA	NA	NA	NA	NA	NA	NA	NA	21.02.2019	EDM
Nukumaru Limestone	117	9.8	18	INT	NKLS_9.8_#18I_Col_4_b	4	2	NA	NA	NA	NA	185	212	NA	NA	NA	NA	NA	NA	21.02.2019	EDM
Nukumaru Limestone	118	9.8	18	INT	NKLS_9.8_#18I_Col_4_b	4	1	NA	NA	NA	NA	184	234	NA	NA	NA	NA	NA	NA	21.02.2019	EDM
Nukumaru Limestone	119	9.8	18	INT	NKLS_9.8_#18I_Col_4_b	4	13	NA	NA	NA	NA	171	230	36	79	NA	NA	NA	NA	21.02.2019	EDM
Nukumaru Limestone	120	9.8	18	INT	NKLS_9.8_#18I_Col_4_b	4	12	NA	NA	NA	NA	175	226	34	73	NA	NA	NA	NA	21.02.2019	EDM
Nukumaru Limestone	121	9.8	18	INT	NKLS_9.8_#18I_Col_4_b	4	31	375	167	NA	NA	NA	NA	NA	NA	NA	NA	NA	NA	21.02.2019	EDM
Nukumaru Limestone	122	9.8	18	INT	NKLS_9.8_#18I_Col_4_b	4	32	406	171	NA	NA	NA	NA	NA	NA	NA	NA	NA	NA	21.02.2019	EDM
Nukumaru Limestone	123	9.8	18	INT	NKLS_9.8_#18I_Col_4_b	4	30	359	157	NA	NA	NA	NA	NA	NA	NA	NA	NA	NA	21.02.2019	EDM
Nukumaru Limestone	124	9.8	18	INT	NKLS_9.8_#18I_Col_4_b	4	53	380	193	NA	NA	NA	NA	NA	NA	NA	NA	NA	NA	21.02.2019	EDM
Nukumaru Limestone	125	9.8	18	INT	NKLS_9.8_#18I_Col_4_b	4	19	360	198	NA	NA	NA	NA	NA	NA	NA	NA	NA	NA	21.02.2019	EDM
Nukumaru Limestone	126	9.8	20	INT	NKLS_9.8_#20I_Col_1_a	1	1	NA	NA	NA	NA	175	232	31	72	NA	NA	NA	NA	21.02.2019	EDM
Nukumaru Limestone	127	9.8	20	INT	NKLS_9.8_#20I_Col_2_a	2	47	NA	NA	53	51	NA	NA	NA	NA	NA	NA	NA	NA	21.02.2019	EDM
Nukumaru Limestone	128	9.8	20	INT	NKLS_9.8_#20I_Col_2_a	2	59	325	177	55	56	NA	NA	NA	NA	NA	NA	NA	NA	21.02.2019	EDM
Nukumaru Limestone	129	9.8	20	INT	NKLS_9.8_#20I_Col_2_a	2	58	NA	NA	50	57	NA	NA	NA	NA	NA	NA	NA	NA	21.02.2019	EDM
Nukumaru Limestone	130	9.8	20	INT	NKLS_9.8_#20I_Col_2_a	2	76	NA	NA	51	55	NA	NA	NA	NA	NA	NA	NA	NA	21.02.2019	EDM
Nukumaru Limestone	131	9.8	20	INT	NKLS_9.8_#20I_Col_2_a	2	72	NA	NA	51	54	NA	NA	NA	NA	NA	NA	NA	NA	21.02.2019	EDM
Nukumaru Limestone	132	9.8	20	INT	NKLS_9.8_#20I_Col_2_a	2	48	442	193	NA	NA	NA	NA	NA	NA	NA	NA	NA	NA	21.02.2019	EDM
Nukumaru Limestone	133	9.8	20	INT	NKLS_9.8_#20I_Col_2_a	2	49	366	183	NA	NA	NA	NA	NA	NA	NA	NA	NA	NA	21.02.2019	EDM
Nukumaru Limestone	134	9.8	20	INT	NKLS_9.8_#20I_Col_2_a	2	45	422	160	NA	NA	NA	NA	NA	NA	NA	NA	NA	NA	21.02.2019	EDM
Nukumaru Limestone	135	9.8	20	INT	NKLS_9.8_#20I_Col_2_a	2	35	447	171	NA	NA	NA	NA	NA	NA	NA	NA	NA	NA	21.02.2019	EDM
Nukumaru Limestone	136	9.8	20	INT	NKLS_9.8_#20I_Col_2_a	2	52	517	188	NA	NA	NA	NA	NA	NA	NA	NA	NA	NA	21.02.2019	EDM
Nukumaru Limestone	137	9.8	20	INT	NKLS_9.8_#20I_Col_2_a	2	53	369	181	NA	NA	NA	NA	NA	NA	NA	NA	NA	NA	21.02.2019	EDM
Nukumaru Limestone	138	9.8	20	INT	NKLS_9.8_#20I_Col_2_a	2	51	342	202	NA	NA	NA	NA	NA	NA	NA	NA	NA	NA	21.02.2019	EDM
Nukumaru Limestone	139	9.8	20	INT	NKLS_9.8_#20I_Col_2_a	2	38	378	214	NA	NA	NA	NA	NA	NA	NA	NA	NA	NA	21.02.2019	EDM
Nukumaru Limestone	140	9.8	22	INT	NKLS_9.8_#22I_Col_8_a	8	55	NA	NA	NA	NA	202	212	NA	NA	NA	NA	NA	NA	21.02.2019	EDM
Nukumaru Limestone	141	9.8	22	INT	NKLS_9.8_#22I_Col_8_a	8	2	NA	NA	NA	NA	212	220	NA	NA	NA	NA	NA	NA	21.02.2019	EDM
Nukumaru Limestone	142	9.8	22	INT	NKLS_9.8_#22I_Col_8_a	8	3	NA	NA	NA	NA	201	222	NA	NA	NA	NA	NA	NA	21.02.2019	EDM
Nukumaru Limestone	143	9.8	22	INT	NKLS_9.8_#22I_Col_8_a	8	6	NA	NA	NA	NA	210	222	NA	NA	NA	NA	NA	NA	21.02.2019	EDM
Nukumaru Limestone	144	9.8	22	INT	NKLS_9.8_#22I_Col_8_a	8	8	NA	NA	NA	NA	212	225	NA	NA	NA	NA	NA	NA	21.02.2019	EDM
Nukumaru Limestone	145	9.8	22	INT	NKLS_9.8_#22I_Col_8_a	8	39	432	173	NA	NA	NA	NA	NA	NA	NA	NA	NA	NA	21.02.2019	EDM
Nukumaru Limestone	146	9.8	22	INT	NKLS_9.8_#22I_Col_8_a	8	53	387	167	NA	NA	NA	NA	NA	NA	NA	NA	NA	NA	21.02.2019	EDM
Nukumaru Limestone	147	9.8	22	INT	NKLS_9.8_#22I_Col_8_a	8	52	350	152	NA	NA	NA	NA	NA	NA	NA	NA	NA	NA	21.02.2019	EDM
Nukumaru Limestone	148	9.8	22	INT	NKLS_9.8_#22I_Col_8_a	8	30	415	194	NA	NA	NA	NA	NA	NA	NA	NA	NA	NA	21.02.2019	EDM
Nukumaru Limestone	149	9.8	22	INT	NKLS_9.8_#22I_Col_8_a	8	37	351	180	NA	NA	NA	NA	NA	NA	NA	NA	NA	NA	21.02.2019	EDM
Nukumaru Limestone	150	9.8	22	INT	NKLS_9.8_#22I_Col_8_b	8	2	NA	NA	NA	NA	201	202	NA	NA	NA	NA	NA	NA	21.02.2019	EDM
Nukumaru Limestone	151	9.8	22	INT	NKLS_9.8_#22I_Col_8_b	8	3	NA	NA	NA	NA	210	219	NA	NA	NA	NA	NA	NA	21.02.2019	EDM
Nukumaru Limestone	152	9.8	28	INT	NKLS_9.8_#28I_Col_8_a	8	21	377	166	65	61	NA	NA	NA	NA	NA	NA	NA	NA	21.02.2019	EDM
Nukumaru Limestone	153	9.8	28	INT	NKLS_9.8_#28I_Col_8_a	8	20	418	162	61	64	NA	NA	NA	NA	NA	NA	NA	NA	21.02.2019	EDM
Nukumaru Limestone	154	9.8	28	INT	NKLS_9.8_#28I_Col_8_a	8	14	334	158	61	62	NA	NA	NA	NA	NA	NA	NA	NA	21.02.2019	EDM
Nukumaru Limestone	155	9.8	28	INT	NKLS_9.8_#28I_Col_8_a	8	12	NA	NA	60	61	NA	NA	NA	NA	NA	NA	NA	NA	21.02.2019	EDM
Nukumaru Limestone	156	9.8	28	INT	NKLS_9.8_#28I_Col_8_a	8	13	NA	NA	57	57	NA	NA	NA	NA	NA	NA	NA	NA	21.02.2019	EDM
Nukumaru Limestone	157	9.8	28	INT	NKLS_9.8_#28I_Col_8_a	8	19	367	170	68	58	NA	NA	NA	NA	NA	NA	NA	NA	21.02.2019	EDM
Nukumaru Limestone	158	9.8	28	INT	NKLS_9.8_#28I_Col_8_a	8	36	351	175	NA	NA	NA	NA	NA	NA	NA	NA	NA	NA	21.02.2019	EDM
Nukumaru Limestone	159	9.8	28	INT	NKLS_9.8_#28I_Col_8_a	8	18	376	186	NA	NA	NA	NA	NA	NA	NA	NA	NA	NA	21.02.2019	EDM
Nukumaru Limestone	160	9.8	28	INT	NKLS_9.8_#28I_Col_8_a	8	22	324	173	NA	NA	NA	NA	NA	NA	NA	NA	NA	NA	21.02.2019	EDM
Nukumaru Limestone	161	9.8	32	INT	NKLS_9.8_#32I_Col_10_a	10	3	NA	NA	NA	NA	190	193	38	72	NA	NA	NA	NA	21.02.2019	EDM
Nukumaru Limestone	162	9.8	32	INT	NKLS_9.8_#32I_Col_10_a	10	2	NA	NA	NA	NA	193	208	38	77	NA	NA	NA	NA	21.02.2019	EDM
Nukumaru Limestone	163	9.8	32	INT	NKLS_9.8_#32I_Col_10_a	10	1	NA	NA	NA	NA	181	197	NA	NA	NA	NA	NA	NA	21.02.2019	EDM
Nukumaru Limestone	164	9.8	32	INT	NKLS_9.8_#32I_Col_10_a	10	12	354	162	61	58	NA	NA	NA	NA	NA	NA	NA	NA	21.02.2019	EDM
Nukumaru Limestone	165	9.8	32	INT	NKLS_9.8_#32I_Col_10_a	10	11	321	191	57	53	NA	NA	NA	NA	NA	NA	NA	NA	21.02.2019	EDM
Nukumaru Limestone	166	9.8	32	INT	NKLS_9.8_#32I_Col_10_a	10	17	321	158	NA	NA	NA	NA	NA	NA	NA	NA	NA	NA	21.02.2019	EDM
Nukumaru Limestone	167	9.8	32	INT	NKLS_9.8_#32I_Col_10_a	10	46	351	148	NA	NA	NA	NA	NA	NA	NA	NA	NA	NA	21.02.2019	EDM
Nukumaru Limestone	168	9.8	32	INT	NKLS_9.8_#32I_Col_10_a	10	67	411	164	NA	NA	NA	NA	NA	NA	NA	NA	NA	NA	21.02.2019	EDM
Nukumaru Limestone	169	9.8	32	INT	NKLS_9.8_#32I_Col_10_a	10	63	337	146	NA	NA	NA	NA	NA	NA	NA	NA	NA	NA	21.02.2019	EDM
Nukumaru Limestone	170	9.8	32	INT	NKLS_9.8_#32I_Col_10_a	10	40	367	141	NA	NA	NA	NA	NA	NA	NA	NA	NA	NA	21.02.2019	EDM
Nukumaru Limestone	171	9.8	32	INT	NKLS_9.8_#32I_Col_10_a	10	54	391	149	NA	NA	NA	NA	NA	NA	NA	NA	NA	NA	21.02.2019	EDM
Nukumaru Limestone	172	9.8	32	INT	NKLS_9.8_#32I_Col_10_a	10	53	431	147	NA	NA	NA	NA	NA	NA	NA	NA	NA	NA	21.02.2019	EDM
Nukumaru Limestone	173	9.8	32	INT	NKLS_9.8_#32I_Col_10_a	10	52	469	146	NA	NA	NA	NA	NA	NA	NA	NA	NA	NA	21.02.2019	EDM
Nukumaru Limestone	174	9.8	32	INT	NKLS_9.8_#32I_Col_10_a	10	19	331	151	NA	NA	NA	NA	NA	NA	NA	NA	NA	NA	21.02.2019	EDM
Nukumaru Limestone	175	9.8	32	INT	NKLS_9.8_#32I_Col_10_a	10	65	NA	NA	58	57	NA	NA	NA	NA	NA	NA	NA	NA	21.02.2019	EDM
Nukumaru Limestone	176	9.8	32	INT	NKLS_9.8_#32I_Col_10_a	10	18	NA	NA	65	61	NA	NA	NA	NA	NA	NA	NA	NA	21.02.2019	EDM
Nukumaru Limestone	177	9.8	32	INT	NKLS_9.8_#32I_Col_10_a	10	42	NA	NA	66	54	NA	NA	NA	NA	NA	NA	NA	NA	21.02.2019	EDM
Nukumaru Limestone	178	9.8	35	INT	NKLS_9.8_#35I_Col_12_a	12	1	NA	NA	NA	NA	198	200	38	81	NA	NA	NA	NA	21.02.2019	EDM
Nukumaru Limestone	179	9.8	35	INT	NKLS_9.8_#35I_Col_12_a	12	2	NA	NA	NA	NA	186	207	40	68	NA	NA	NA	NA	21.02.2019	EDM
Nukumaru Limestone	180	9.8	35	INT	NKLS_9.8_#35I_Col_12_a	12	15	NA	NA	NA	NA	200	227	38	79	NA	NA	NA	NA	21.02.2019	EDM
Nukumaru Limestone	181	9.8	35	INT	NKLS_9.8_#35I_Col_12_a	12	14	NA	NA	NA	NA	193	182	37	77	NA	NA	NA	NA	21.02.2019	EDM
Nukumaru Limestone	182	9.8	35	INT	NKLS_9.8_#35I_Col_12_a	12	16	NA	NA	NA	NA	192	233	NA	NA	NA	NA	NA	NA	21.02.2019	EDM
Nukumaru Limestone	183	9.8	35	INT	NKLS_9.8_#35I_Col_12_a	12	8	NA	NA	NA	NA	197	203	41	61	NA	NA	NA	NA	21.02.2019	EDM
Nukumaru Limestone	184	9.8	35	INT	NKLS_9.8_#35I_Col_12_a	12	6	NA	NA	NA	NA	188	224	NA	NA	NA	NA	NA	NA	21.02.2019	EDM
Nukumaru Limestone	185	9.8	35	INT	NKLS_9.8_#35I_Col_12_a	12	7	NA	NA	NA	NA	194	210	NA	NA	NA	NA	NA	NA	21.02.2019	EDM
Nukumaru Limestone	186	9.8	35	INT	NKLS_9.8_#35I_Col_12_a	12	23	NA	NA	NA	NA	203	205	NA	NA	NA	NA	NA	NA	21.02.2019	EDM
Nukumaru Limestone	187	9.8	35	INT	NKLS_9.8_#35I_Col_12_a	12	5	NA	NA	NA	NA	179	183	45	64	NA	NA	NA	NA	21.02.2019	EDM
Nukumaru Limestone	188	9.8	35	INT	NKLS_9.8_#35I_Col_12_a	12	17	NA	NA	NA	NA	195	213	NA	NA	NA	NA	NA	NA	21.02.2019	EDM
Nukumaru Limestone	189	9.8	35	INT	NKLS_9.8_#35I_Col_12_a	12	13	NA	NA	NA	NA	197	187	NA	NA	NA	NA	NA	NA	21.02.2019	EDM
Nukumaru Limestone	190	9.8	35	INT	NKLS_9.8_#35I_Col_12_a	12	12	NA	NA	NA	NA	223	173	38	72	NA	NA	NA	NA	21.02.2019	EDM
Nukumaru Limestone	191	9.8	35	INT	NKLS_9.8_#35I_Col_12_a	12	40	359	156	NA	NA	NA	NA	NA	NA	NA	NA	NA	NA	21.02.2019	EDM
Nukumaru Limestone	192	9.8	35	INT	NKLS_9.8_#35I_Col_12_a	12	64	354	165	NA	NA	NA	NA	NA	NA	NA	NA	NA	NA	21.02.2019	EDM
Nukumaru Limestone	193	9.8	35	INT	NKLS_9.8_#35I_Col_12_a	12	60	341	173	61	61	NA	NA	NA	NA	NA	NA	NA	NA	21.02.2019	EDM
Nukumaru Limestone	194	9.8	35	INT	NKLS_9.8_#35I_Col_12_a	12	37	358	169	NA	NA	NA	NA	NA	NA	NA	NA	NA	NA	21.02.2019	EDM
Nukumaru Limestone	195	9.8	35	INT	NKLS_9.8_#35I_Col_12_a	12	42	NA	NA	68	68	NA	NA	NA	NA	NA	NA	NA	NA	21.02.2019	EDM
Nukumaru Limestone	196	9.8	35	INT	NKLS_9.8_#35I_Col_12_a	12	44	NA	NA	62	67	NA	NA	NA	NA	NA	NA	NA	NA	21.02.2019	EDM
Nukumaru Limestone	197	9.8	35	INT	NKLS_9.8_#35I_Col_12_a	12	59	NA	NA	58	64	NA	NA	NA	NA	NA	NA	NA	NA	21.02.2019	EDM
Nukumaru Limestone	198	9.10	16	INT	NKLS_9.10_#16I_Col_2_a	2	16	NA	NA	NA	NA	173	206	40	78	NA	NA	NA	NA	22.02.2019	EDM
Nukumaru Limestone	199	9.10	16	INT	NKLS_9.10_#16I_Col_2_a	2	8	NA	NA	NA	NA	208	222	38	74	NA	NA	NA	NA	22.02.2019	EDM
Nukumaru Limestone	200	9.10	16	INT	NKLS_9.10_#16I_Col_2_a	2	4	NA	NA	NA	NA	208	256	40	84	NA	NA	NA	NA	22.02.2019	EDM
Nukumaru Limestone	201	9.10	16	INT	NKLS_9.10_#16I_Col_2_a	2	3	NA	NA	NA	NA	188	232	NA	NA	NA	NA	NA	NA	22.02.2019	EDM
Nukumaru Limestone	202	9.10	16	INT	NKLS_9.10_#16I_Col_2_a	2	15	NA	NA	NA	NA	178	231	40	90	NA	NA	NA	NA	22.02.2019	EDM
Nukumaru Limestone	203	9.10	16	INT	NKLS_9.10_#16I_Col_2_a	2	17	NA	NA	NA	NA	165	217	NA	NA	NA	NA	NA	NA	22.02.2019	EDM
Nukumaru Limestone	204	9.10	16	INT	NKLS_9.10_#16I_Col_2_a	2	6	NA	NA	NA	NA	222	234	38	74	NA	NA	NA	NA	22.02.2019	EDM
Nukumaru Limestone	205	9.10	16	INT	NKLS_9.10_#16I_Col_2_a	2	7	NA	NA	NA	NA	191	232	NA	NA	NA	NA	NA	NA	22.02.2019	EDM
Nukumaru Limestone	206	9.10	16	INT	NKLS_9.10_#16I_Col_2_a	2	14	NA	NA	NA	NA	169	217	NA	NA	NA	NA	NA	NA	22.02.2019	EDM
Nukumaru Limestone	207	9.10	16	INT	NKLS_9.10_#16I_Col_2_a	2	13	NA	NA	NA	NA	186	243	41	77	NA	NA	NA	NA	22.02.2019	EDM
Nukumaru Limestone	208	9.10	16	INT	NKLS_9.10_#16I_Col_2_a	2	5	NA	NA	NA	NA	194	217	NA	NA	NA	NA	NA	NA	22.02.2019	EDM
Nukumaru Limestone	209	9.10	16	INT	NKLS_9.10_#16I_Col_2_a	2	10	NA	NA	NA	NA	230	207	NA	NA	NA	NA	NA	NA	22.02.2019	EDM
Nukumaru Limestone	210	9.10	16	INT	NKLS_9.10_#16I_Col_2_a	2	12	NA	NA	NA	NA	211	215	NA	NA	NA	NA	NA	NA	22.02.2019	EDM
Nukumaru Limestone	211	9.10	16	INT	NKLS_9.10_#16I_Col_2_a	2	34	414	208	67	52	NA	NA	NA	NA	NA	NA	NA	NA	22.02.2019	EDM
Nukumaru Limestone	212	9.10	16	INT	NKLS_9.10_#16I_Col_2_a	2	30	477	147	NA	NA	NA	NA	NA	NA	NA	NA	NA	NA	22.02.2019	EDM
Nukumaru Limestone	213	9.10	16	INT	NKLS_9.10_#16I_Col_2_a	2	27	467	175	67	60	NA	NA	NA	NA	NA	NA	NA	NA	22.02.2019	EDM
Nukumaru Limestone	214	9.10	16	INT	NKLS_9.10_#16I_Col_2_a	2	37	480	151	NA	NA	NA	NA	NA	NA	NA	NA	NA	NA	22.02.2019	EDM
Nukumaru Limestone	215	9.10	16	INT	NKLS_9.10_#16I_Col_2_a	2	36	443	155	NA	NA	NA	NA	NA	NA	NA	NA	NA	NA	22.02.2019	EDM
Nukumaru Limestone	216	9.10	16	INT	NKLS_9.10_#16I_Col_2_a	2	41	484	177	NA	NA	NA	NA	NA	NA	NA	NA	NA	NA	22.02.2019	EDM
Nukumaru Limestone	217	9.10	16	INT	NKLS_9.10_#16I_Col_2_a	2	23	500	155	NA	NA	NA	NA	NA	NA	NA	NA	NA	NA	22.02.2019	EDM
Nukumaru Limestone	218	9.10	16	INT	NKLS_9.10_#16I_Col_2_a	2	28	538	193	NA	NA	NA	NA	NA	NA	NA	NA	NA	NA	22.02.2019	EDM
Nukumaru Limestone	219	9.10	16	INT	NKLS_9.10_#16I_Col_2_a	2	29	523	149	NA	NA	NA	NA	NA	NA	NA	NA	NA	NA	22.02.2019	EDM
Nukumaru Limestone	220	9.10	16	INT	NKLS_9.10_#16I_Col_2_a	2	38	NA	NA	68	62	NA	NA	NA	NA	NA	NA	NA	NA	22.02.2019	EDM
Nukumaru Limestone	221	9.10	16	INT	NKLS_9.10_#16I_Col_2_a	2	31	NA	NA	62	62	NA	NA	NA	NA	NA	NA	NA	NA	22.02.2019	EDM
Nukumaru Limestone	222	9.10	16	INT	NKLS_9.10_#16I_Col_2_a	2	33	NA	NA	58	50	NA	NA	NA	NA	NA	NA	NA	NA	22.02.2019	EDM
Nukumaru Limestone	223	9.10	16	INT	NKLS_9.10_#16I_Col_2_b	2	1	NA	NA	NA	NA	204	213	NA	NA	NA	NA	NA	NA	22.02.2019	EDM
Nukumaru Limestone	224	9.10	16	INT	NKLS_9.10_#16I_Col_2_b	2	2	NA	NA	NA	NA	210	211	38	84	NA	NA	NA	NA	22.02.2019	EDM
Nukumaru Limestone	225	9.10	16	INT	NKLS_9.10_#16I_Col_2_b	2	4	NA	NA	NA	NA	185	214	40	83	NA	NA	NA	NA	22.02.2019	EDM
Nukumaru Limestone	226	9.10	16	INT	NKLS_9.10_#16I_Col_2_b	2	45	469	180	NA	NA	NA	NA	NA	NA	NA	NA	NA	NA	22.02.2019	EDM
Nukumaru Limestone	227	9.10	16	INT	NKLS_9.10_#16I_Col_2_b	2	59	394	188	NA	NA	NA	NA	NA	NA	NA	NA	NA	NA	22.02.2019	EDM
Nukumaru Limestone	228	9.10	16	INT	NKLS_9.10_#16I_Col_2_b	2	27	421	204	NA	NA	NA	NA	NA	NA	NA	NA	NA	NA	22.02.2019	EDM
Nukumaru Limestone	229	9.10	16	INT	NKLS_9.10_#16I_Col_2_b	2	24	462	185	NA	NA	NA	NA	NA	NA	NA	NA	NA	NA	22.02.2019	EDM
Nukumaru Limestone	230	9.10	16	INT	NKLS_9.10_#16I_Col_2_b	2	42	488	230	57	61	NA	NA	NA	NA	NA	NA	NA	NA	22.02.2019	EDM
Nukumaru Limestone	231	9.10	16	INT	NKLS_9.10_#16I_Col_2_b	2	33	412	235	NA	NA	NA	NA	NA	NA	NA	NA	NA	NA	22.02.2019	EDM
Nukumaru Limestone	232	9.10	16	INT	NKLS_9.10_#16I_Col_2_b	2	32	412	200	NA	NA	NA	NA	NA	NA	NA	NA	NA	NA	22.02.2019	EDM
Nukumaru Limestone	233	9.10	16	INT	NKLS_9.10_#16I_Col_2_b	2	34	437	177	NA	NA	NA	NA	NA	NA	NA	NA	NA	NA	22.02.2019	EDM
Nukumaru Limestone	234	9.10	16	INT	NKLS_9.10_#16I_Col_2_b	2	35	465	188	NA	NA	NA	NA	NA	NA	NA	NA	NA	NA	22.02.2019	EDM
Nukumaru Limestone	235	9.10	16	INT	NKLS_9.10_#16I_Col_2_b	2	51	483	214	NA	NA	NA	NA	NA	NA	NA	NA	NA	NA	22.02.2019	EDM
Nukumaru Limestone	236	9.10	16	INT	NKLS_9.10_#16I_Col_2_b	2	52	394	179	NA	NA	NA	NA	NA	NA	NA	NA	NA	NA	22.02.2019	EDM
Nukumaru Limestone	237	9.10	16	INT	NKLS_9.10_#16I_Col_2_b	2	29	443	225	NA	NA	NA	NA	NA	NA	NA	NA	NA	NA	22.02.2019	EDM
Nukumaru Limestone	238	9.10	16	INT	NKLS_9.10_#16I_Col_2_b	2	41	438	177	NA	NA	NA	NA	NA	NA	NA	NA	NA	NA	22.02.2019	EDM
Nukumaru Limestone	239	9.10	16	INT	NKLS_9.10_#16I_Col_2_b	2	48	NA	NA	59	57	NA	NA	NA	NA	NA	NA	NA	NA	22.02.2019	EDM
Nukumaru Limestone	240	9.10	16	INT	NKLS_9.10_#16I_Col_2_b	2	8	NA	NA	NA	NA	NA	NA	NA	NA	305	192	NA	NA	22.02.2019	EDM
Nukumaru Limestone	241	9.10	16	INT	NKLS_9.10_#16I_Col_2_b	2	9	NA	NA	NA	NA	NA	NA	NA	NA	378	187	NA	NA	22.02.2019	EDM
Nukumaru Limestone	242	9.10	16	INT	NKLS_9.10_#16I_Col_2_b	2	7	NA	NA	NA	NA	NA	NA	NA	NA	387	196	36	35	22.02.2019	EDM
Nukumaru Limestone	243	9.10	16	INT	NKLS_9.10_#16I_Col_2_b	2	14	NA	NA	NA	NA	NA	NA	NA	NA	326	186	NA	NA	22.02.2019	EDM
Nukumaru Limestone	244	9.10	16	INT	NKLS_9.10_#16I_Col_2_b	2	10	NA	NA	NA	NA	NA	NA	NA	NA	311	183	NA	NA	22.02.2019	EDM
Nukumaru Limestone	245	9.10	16	INT	NKLS_9.10_#16I_Col_2_b	2	16	NA	NA	NA	NA	NA	NA	NA	NA	357	161	NA	NA	22.02.2019	EDM
Nukumaru Limestone	246	9.10	16	INT	NKLS_9.10_#16I_Col_2_b	2	15	NA	NA	NA	NA	NA	NA	NA	NA	349	239	NA	NA	22.02.2019	EDM
Nukumaru Limestone	247	9.10	16	INT	NKLS_9.10_#16I_Col_2_b	2	56	432	206	NA	NA	NA	NA	NA	NA	NA	NA	NA	NA	22.02.2019	EDM
Nukumaru Limestone	248	9.10	16	INT	NKLS_9.10_#16I_Col_2_b	2	53	370	187	NA	NA	NA	NA	NA	NA	NA	NA	NA	NA	22.02.2019	EDM
Nukumaru Limestone	249	9.10	16	INT	NKLS_9.10_#16I_Col_2_b	2	54	349	195	NA	NA	NA	NA	NA	NA	NA	NA	NA	NA	22.02.2019	EDM
Nukumaru Limestone	250	9.10	16	INT	NKLS_9.10_#16I_Col_2_b	2	6	NA	NA	NA	NA	NA	NA	NA	NA	NA	NA	35	27	22.02.2019	EDM
Nukumaru Limestone	251	9.10	16	INT	NKLS_9.10_#16I_Col_2_b	2	19	NA	NA	63	53	NA	NA	NA	NA	NA	NA	NA	NA	22.02.2019	EDM
Nukumaru Limestone	252	9.10	16	INT	NKLS_9.10_#16I_Col_2_b	2	46	NA	NA	58	55	NA	NA	NA	NA	NA	NA	NA	NA	22.02.2019	EDM
Nukumaru Limestone	253	9.10	16	INT	NKLS_9.10_#16I_Col_2_b	2	36	NA	NA	61	67	NA	NA	NA	NA	NA	NA	NA	NA	22.02.2019	EDM
Nukumaru Limestone	254	9.10	16	INT	NKLS_9.10_#16I_Col_2_c	2	2	NA	NA	NA	NA	182	220	37	74	NA	NA	NA	NA	22.02.2019	EDM
Nukumaru Limestone	255	9.10	16	INT	NKLS_9.10_#16I_Col_2_c	2	6	NA	NA	NA	NA	169	259	38	74	NA	NA	NA	NA	22.02.2019	EDM
Nukumaru Limestone	256	9.10	16	INT	NKLS_9.10_#16I_Col_2_c	2	4	NA	NA	NA	NA	179	229	44	77	NA	NA	NA	NA	22.02.2019	EDM
Nukumaru Limestone	257	9.10	16	INT	NKLS_9.10_#16I_Col_2_c	2	8	NA	NA	NA	NA	176	243	42	64	NA	NA	NA	NA	22.02.2019	EDM
Nukumaru Limestone	258	9.10	16	INT	NKLS_9.10_#16I_Col_2_c	2	5	NA	NA	NA	NA	174	251	42	80	NA	NA	NA	NA	22.02.2019	EDM
Nukumaru Limestone	259	9.10	16	INT	NKLS_9.10_#16I_Col_2_c	2	47	435	164	66	58	NA	NA	NA	NA	NA	NA	NA	NA	22.02.2019	EDM
Nukumaru Limestone	260	9.10	16	INT	NKLS_9.10_#16I_Col_2_c	2	42	372	182	NA	NA	NA	NA	NA	NA	NA	NA	NA	NA	22.02.2019	EDM
Nukumaru Limestone	261	9.10	16	INT	NKLS_9.10_#16I_Col_2_c	2	46	380	156	NA	NA	NA	NA	NA	NA	NA	NA	NA	NA	22.02.2019	EDM
Nukumaru Limestone	262	9.10	16	INT	NKLS_9.10_#16I_Col_2_c	2	12	NA	NA	NA	NA	NA	NA	NA	NA	306	135	NA	NA	22.02.2019	EDM
Nukumaru Limestone	263	9.10	16	INT	NKLS_9.10_#16I_Col_2_c	2	14	NA	NA	NA	NA	NA	NA	NA	NA	326	139	NA	NA	22.02.2019	EDM
Nukumaru Limestone	264	9.10	16	INT	NKLS_9.10_#16I_Col_2_c	2	13	NA	NA	NA	NA	NA	NA	NA	NA	396	182	NA	NA	22.02.2019	EDM
Nukumaru Limestone	265	9.10	16	INT	NKLS_9.10_#16I_Col_2_c	2	11	NA	NA	NA	NA	NA	NA	NA	NA	399	174	NA	NA	22.02.2019	EDM
Nukumaru Limestone	266	9.10	16	INT	NKLS_9.10_#16I_Col_2_d	2	1	NA	NA	NA	NA	191	221	41	70	NA	NA	NA	NA	22.02.2019	EDM
Nukumaru Limestone	267	9.10	16	INT	NKLS_9.10_#16I_Col_2_d	2	2	NA	NA	NA	NA	212	189	39	76	NA	NA	NA	NA	22.02.2019	EDM
Nukumaru Limestone	268	9.10	16	INT	NKLS_9.10_#16I_Col_2_d	2	3	NA	NA	NA	NA	190	208	37	85	NA	NA	NA	NA	22.02.2019	EDM
Nukumaru Limestone	269	9.10	16	INT	NKLS_9.10_#16I_Col_2_d	2	4	NA	NA	NA	NA	203	231	41	83	NA	NA	NA	NA	22.02.2019	EDM
Nukumaru Limestone	270	9.10	16	INT	NKLS_9.10_#16I_Col_2_d	2	65	367	203	67	66	NA	NA	NA	NA	NA	NA	NA	NA	22.02.2019	EDM
Nukumaru Limestone	271	9.10	16	INT	NKLS_9.10_#16I_Col_2_d	2	67	383	200	NA	NA	NA	NA	NA	NA	NA	NA	NA	NA	22.02.2019	EDM
Nukumaru Limestone	272	9.10	16	INT	NKLS_9.10_#16I_Col_2_d	2	69	378	175	NA	NA	NA	NA	NA	NA	NA	NA	NA	NA	22.02.2019	EDM
Nukumaru Limestone	273	9.10	16	INT	NKLS_9.10_#16I_Col_2_d	2	49	366	169	NA	NA	NA	NA	NA	NA	NA	NA	NA	NA	22.02.2019	EDM
Nukumaru Limestone	274	9.10	16	INT	NKLS_9.10_#16I_Col_2_d	2	37	425	190	NA	NA	NA	NA	NA	NA	NA	NA	NA	NA	22.02.2019	EDM
Nukumaru Limestone	275	9.10	16	INT	NKLS_9.10_#16I_Col_2_d	2	34	490	175	NA	NA	NA	NA	NA	NA	NA	NA	NA	NA	22.02.2019	EDM
Nukumaru Limestone	276	9.10	16	INT	NKLS_9.10_#16I_Col_2_d	2	17	506	202	NA	NA	NA	NA	NA	NA	NA	NA	NA	NA	22.02.2019	EDM
Nukumaru Limestone	277	9.10	16	INT	NKLS_9.10_#16I_Col_2_d	2	61	388	165	NA	NA	NA	NA	NA	NA	NA	NA	NA	NA	22.02.2019	EDM
Nukumaru Limestone	278	9.10	16	INT	NKLS_9.10_#16I_Col_2_d	2	48	363	176	NA	NA	NA	NA	NA	NA	NA	NA	NA	NA	22.02.2019	EDM
Nukumaru Limestone	279	9.10	16	INT	NKLS_9.10_#16I_Col_2_d	2	50	322	185	NA	NA	NA	NA	NA	NA	NA	NA	NA	NA	22.02.2019	EDM
Nukumaru Limestone	280	9.10	16	INT	NKLS_9.10_#16I_Col_2_d	2	51	343	185	NA	NA	NA	NA	NA	NA	NA	NA	NA	NA	22.02.2019	EDM
Nukumaru Limestone	281	9.10	16	INT	NKLS_9.10_#16I_Col_2_d	2	58	340	185	NA	NA	NA	NA	NA	NA	NA	NA	NA	NA	22.02.2019	EDM
Nukumaru Limestone	282	9.10	16	INT	NKLS_9.10_#16I_Col_2_d	2	57	407	172	NA	NA	NA	NA	NA	NA	NA	NA	NA	NA	22.02.2019	EDM
Nukumaru Limestone	283	9.10	16	INT	NKLS_9.10_#16I_Col_2_d	2	68	461	143	58	58	NA	NA	NA	NA	NA	NA	NA	NA	22.02.2019	EDM
Nukumaru Limestone	284	9.10	16	INT	NKLS_9.10_#16I_Col_2_d	2	44	434	197	NA	NA	NA	NA	NA	NA	NA	NA	NA	NA	22.02.2019	EDM
Nukumaru Limestone	285	9.10	16	INT	NKLS_9.10_#16I_Col_2_d	2	54	450	193	70	63	NA	NA	NA	NA	NA	NA	NA	NA	22.02.2019	EDM
Nukumaru Limestone	286	9.10	16	INT	NKLS_9.10_#16I_Col_2_d	2	6	NA	NA	NA	NA	NA	NA	NA	NA	345	203	34	35	22.02.2019	EDM
Nukumaru Limestone	287	9.10	16	INT	NKLS_9.10_#16I_Col_2_d	2	5	NA	NA	NA	NA	NA	NA	NA	NA	270	200	40	29	22.02.2019	EDM
Nukumaru Limestone	288	9.10	16	INT	NKLS_9.10_#16I_Col_2_d	2	8	NA	NA	NA	NA	NA	NA	NA	NA	368	178	NA	NA	22.02.2019	EDM
Nukumaru Limestone	289	9.10	16	INT	NKLS_9.10_#16I_Col_2_d	2	7	NA	NA	NA	NA	NA	NA	NA	NA	352	160	NA	NA	22.02.2019	EDM
Nukumaru Limestone	290	9.10	16	INT	NKLS_9.10_#16I_Col_2_d	2	10	NA	NA	NA	NA	NA	NA	NA	NA	365	171	NA	NA	22.02.2019	EDM
Nukumaru Limestone	291	9.10	16	INT	NKLS_9.10_#16I_Col_2_d	2	16	NA	NA	NA	NA	NA	NA	NA	NA	360	161	43	30	22.02.2019	EDM
Nukumaru Limestone	292	9.10	16	INT	NKLS_9.10_#16I_Col_2_d	2	15	NA	NA	NA	NA	NA	NA	NA	NA	341	172	40	34	22.02.2019	EDM
Nukumaru Limestone	293	9.10	16	INT	NKLS_9.10_#16I_Col_2_d	2	66	NA	NA	67	58	NA	NA	NA	NA	NA	NA	NA	NA	22.02.2019	EDM
Nukumaru Limestone	294	9.10	16	INT	NKLS_9.10_#16I_Col_2_d	2	60	392	168	54	56	NA	NA	NA	NA	NA	NA	NA	NA	22.02.2019	EDM
Nukumaru Limestone	295	9.12	3	EXT	NKLS_9.12_#3E_Col_4_a	4	36	381	146	NA	NA	NA	NA	NA	NA	NA	NA	NA	NA	25.02.2019	EDM
Nukumaru Limestone	296	9.12	3	EXT	NKLS_9.12_#3E_Col_4_a	4	26	377	137	NA	NA	NA	NA	NA	NA	NA	NA	NA	NA	25.02.2019	EDM
Nukumaru Limestone	297	9.12	3	EXT	NKLS_9.12_#3E_Col_4_a	4	4	NA	NA	NA	NA	180	210	42	74	NA	NA	NA	NA	25.02.2019	EDM
Nukumaru Limestone	298	9.12	3	EXT	NKLS_9.12_#3E_Col_4_a	4	5	NA	NA	NA	NA	186	187	39	64	NA	NA	NA	NA	25.02.2019	EDM
Nukumaru Limestone	299	9.12	3	EXT	NKLS_9.12_#3E_Col_4_a	4	15	332	147	53	54	NA	NA	NA	NA	NA	NA	NA	NA	25.02.2019	EDM
Nukumaru Limestone	300	9.12	3	EXT	NKLS_9.12_#3E_Col_4_a	4	14	343	132	NA	NA	NA	NA	NA	NA	NA	NA	NA	NA	25.02.2019	EDM
Nukumaru Limestone	301	9.12	3	EXT	NKLS_9.12_#3E_Col_4_a	4	44	390	130	NA	NA	NA	NA	NA	NA	NA	NA	NA	NA	25.02.2019	EDM
Nukumaru Limestone	302	9.12	3	EXT	NKLS_9.12_#3E_Col_4_a	4	30	434	159	NA	NA	NA	NA	NA	NA	NA	NA	NA	NA	25.02.2019	EDM
Nukumaru Limestone	303	9.12	3	EXT	NKLS_9.12_#3E_Col_4_a	4	49	364	146	NA	NA	NA	NA	NA	NA	NA	NA	NA	NA	25.02.2019	EDM
Nukumaru Limestone	304	9.12	3	EXT	NKLS_9.12_#3E_Col_4_a	4	37	NA	NA	50	54	NA	NA	NA	NA	NA	NA	NA	NA	25.02.2019	EDM
Nukumaru Limestone	305	9.12	3	EXT	NKLS_9.12_#3E_Col_4_a	4	31	NA	NA	50	62	NA	NA	NA	NA	NA	NA	NA	NA	25.02.2019	EDM
Nukumaru Limestone	306	9.12	3	EXT	NKLS_9.12_#3E_Col_12_a	12	57	407	149	NA	NA	NA	NA	NA	NA	NA	NA	NA	NA	25.02.2019	EDM
Nukumaru Limestone	307	9.12	3	EXT	NKLS_9.12_#3E_Col_12_a	12	12	367	156	NA	NA	NA	NA	NA	NA	NA	NA	NA	NA	25.02.2019	EDM
Nukumaru Limestone	308	9.12	3	EXT	NKLS_9.12_#3E_Col_12_a	12	35	430	156	NA	NA	NA	NA	NA	NA	NA	NA	NA	NA	25.02.2019	EDM
Nukumaru Limestone	309	9.12	3	EXT	NKLS_9.12_#3E_Col_12_a	12	6	385	144	NA	NA	NA	NA	NA	NA	NA	NA	NA	NA	25.02.2019	EDM
Nukumaru Limestone	310	9.12	3	EXT	NKLS_9.12_#3E_Col_12_a	12	62	434	162	NA	NA	NA	NA	NA	NA	NA	NA	NA	NA	25.02.2019	EDM
Nukumaru Limestone	311	9.12	3	EXT	NKLS_9.12_#3E_Col_12_a	12	58	474	167	NA	NA	NA	NA	NA	NA	NA	NA	NA	NA	25.02.2019	EDM
Nukumaru Limestone	312	9.12	3	EXT	NKLS_9.12_#3E_Col_12_a	12	2	447	149	NA	NA	NA	NA	NA	NA	NA	NA	NA	NA	25.02.2019	EDM
Nukumaru Limestone	313	9.12	3	EXT	NKLS_9.12_#3E_Col_12_a	12	55	524	172	NA	NA	NA	NA	NA	NA	NA	NA	NA	NA	25.02.2019	EDM
Nukumaru Limestone	314	9.12	3	EXT	NKLS_9.12_#3E_Col_24_a	24	12	NA	NA	73	63	NA	NA	NA	NA	NA	NA	NA	NA	25.02.2019	EDM
Nukumaru Limestone	315	9.12	3	EXT	NKLS_9.12_#3E_Col_24_a	24	32	NA	NA	66	62	NA	NA	NA	NA	NA	NA	NA	NA	25.02.2019	EDM
Nukumaru Limestone	316	9.12	3	EXT	NKLS_9.12_#3E_Col_24_a	24	18	NA	NA	71	63	NA	NA	NA	NA	NA	NA	NA	NA	25.02.2019	EDM
Nukumaru Limestone	317	9.12	3	EXT	NKLS_9.12_#3E_Col_24_a	24	10	NA	NA	78	65	NA	NA	NA	NA	NA	NA	NA	NA	25.02.2019	EDM
Nukumaru Limestone	318	9.12	3	EXT	NKLS_9.12_#3E_Col_24_a	24	41	NA	NA	69	57	NA	NA	NA	NA	NA	NA	NA	NA	25.02.2019	EDM
Nukumaru Limestone	319	9.12	3	EXT	NKLS_9.12_#3E_Col_24_a	24	46	NA	NA	68	59	NA	NA	NA	NA	NA	NA	NA	NA	25.02.2019	EDM
Nukumaru Limestone	320	9.12	3	EXT	NKLS_9.12_#3E_Col_24_a	24	28	NA	NA	71	60	NA	NA	NA	NA	NA	NA	NA	NA	25.02.2019	EDM
Nukumaru Limestone	321	9.12	3	EXT	NKLS_9.12_#3E_Col_24_a	24	25	NA	NA	67	63	NA	NA	NA	NA	NA	NA	NA	NA	25.02.2019	EDM
Nukumaru Limestone	322	9.12	17	EXT	NKLS_9.12_#17E_Col_15_a	15	19	NA	NA	NA	NA	180	208	42	75	NA	NA	NA	NA	25.02.2019	EDM
Nukumaru Limestone	323	9.12	17	EXT	NKLS_9.12_#17E_Col_15_a	15	5	NA	NA	NA	NA	190	209	42	76	NA	NA	NA	NA	25.02.2019	EDM
Nukumaru Limestone	324	9.12	17	EXT	NKLS_9.12_#17E_Col_15_a	15	6	NA	NA	NA	NA	198	198	41	73	NA	NA	NA	NA	25.02.2019	EDM
Nukumaru Limestone	325	9.12	17	EXT	NKLS_9.12_#17E_Col_15_a	15	3	NA	NA	NA	NA	203	218	43	71	NA	NA	NA	NA	25.02.2019	EDM
Nukumaru Limestone	326	9.12	17	EXT	NKLS_9.12_#17E_Col_15_a	15	18	NA	NA	NA	NA	185	251	44	73	NA	NA	NA	NA	25.02.2019	EDM
Nukumaru Limestone	327	9.12	17	EXT	NKLS_9.12_#17E_Col_15_a	15	17	NA	NA	NA	NA	198	268	38	81	NA	NA	NA	NA	25.02.2019	EDM
Nukumaru Limestone	328	9.12	17	EXT	NKLS_9.12_#17E_Col_15_a	15	13	NA	NA	NA	NA	203	213	48	68	NA	NA	NA	NA	25.02.2019	EDM
Nukumaru Limestone	329	9.12	17	EXT	NKLS_9.12_#17E_Col_15_a	15	12	NA	NA	NA	NA	196	238	46	82	NA	NA	NA	NA	25.02.2019	EDM
Nukumaru Limestone	330	9.12	17	EXT	NKLS_9.12_#17E_Col_15_a	15	16	NA	NA	NA	NA	189	234	NA	NA	NA	NA	NA	NA	25.02.2019	EDM
Nukumaru Limestone	331	9.12	17	EXT	NKLS_9.12_#17E_Col_15_a	15	14	NA	NA	NA	NA	199	222	NA	NA	NA	NA	NA	NA	25.02.2019	EDM
Nukumaru Limestone	332	9.12	17	EXT	NKLS_9.12_#17E_Col_15_a	15	15	NA	NA	NA	NA	196	200	44	75	NA	NA	NA	NA	25.02.2019	EDM
Nukumaru Limestone	333	9.12	17	EXT	NKLS_9.12_#17E_Col_15_a	15	21	NA	NA	NA	NA	185	225	45	80	NA	NA	NA	NA	25.02.2019	EDM
Nukumaru Limestone	334	9.12	17	EXT	NKLS_9.12_#17E_Col_15_a	15	23	NA	NA	NA	NA	178	217	NA	NA	NA	NA	NA	NA	25.02.2019	EDM
Nukumaru Limestone	335	9.12	17	EXT	NKLS_9.12_#17E_Col_15_a	15	22	NA	NA	NA	NA	180	193	NA	NA	NA	NA	NA	NA	25.02.2019	EDM
Nukumaru Limestone	336	9.12	17	EXT	NKLS_9.12_#17E_Col_15_a	15	11	NA	NA	NA	NA	193	229	NA	NA	NA	NA	NA	NA	25.02.2019	EDM
Nukumaru Limestone	337	9.12	17	EXT	NKLS_9.12_#17E_Col_15_a	15	9	NA	NA	NA	NA	170	220	37	77	NA	NA	NA	NA	25.02.2019	EDM
Nukumaru Limestone	338	9.12	17	EXT	NKLS_9.12_#17E_Col_15_a	15	2	NA	NA	NA	NA	207	194	45	69	NA	NA	NA	NA	25.02.2019	EDM
Nukumaru Limestone	339	9.12	17	EXT	NKLS_9.12_#17E_Col_15_a	15	1	NA	NA	NA	NA	194	168	NA	NA	NA	NA	NA	NA	25.02.2019	EDM
Nukumaru Limestone	340	9.12	17	EXT	NKLS_9.12_#17E_Col_15_a	15	7	NA	NA	NA	NA	170	248	NA	NA	NA	NA	NA	NA	25.02.2019	EDM
Nukumaru Limestone	341	9.12	17	EXT	NKLS_9.12_#17E_Col_15_a	15	8	NA	NA	NA	NA	179	244	40	80	NA	NA	NA	NA	25.02.2019	EDM
Nukumaru Limestone	342	9.12	17	EXT	NKLS_9.12_#17E_Col_15_a	15	48	423	168	NA	NA	NA	NA	NA	NA	NA	NA	NA	NA	25.02.2019	EDM
Nukumaru Limestone	343	9.12	17	EXT	NKLS_9.12_#17E_Col_15_a	15	49	414	144	NA	NA	NA	NA	NA	NA	NA	NA	NA	NA	25.02.2019	EDM
Nukumaru Limestone	344	9.12	17	EXT	NKLS_9.12_#17E_Col_15_a	15	38	456	177	NA	NA	NA	NA	NA	NA	NA	NA	NA	NA	25.02.2019	EDM
Nukumaru Limestone	345	9.12	17	EXT	NKLS_9.12_#17E_Col_16_a	16	7	NA	NA	NA	NA	206	249	45	80	NA	NA	NA	NA	25.02.2019	EDM
Nukumaru Limestone	346	9.12	17	EXT	NKLS_9.12_#17E_Col_16_a	16	6	NA	NA	NA	NA	200	228	46	76	NA	NA	NA	NA	25.02.2019	EDM
Nukumaru Limestone	347	9.12	17	EXT	NKLS_9.12_#17E_Col_16_a	16	5	NA	NA	NA	NA	222	244	NA	NA	NA	NA	NA	NA	25.02.2019	EDM
Nukumaru Limestone	348	9.12	17	EXT	NKLS_9.12_#17E_Col_16_a	16	8	NA	NA	NA	NA	213	205	38	74	NA	NA	NA	NA	25.02.2019	EDM
Nukumaru Limestone	349	9.12	17	EXT	NKLS_9.12_#17E_Col_16_a	16	4	NA	NA	NA	NA	204	209	NA	NA	NA	NA	NA	NA	25.02.2019	EDM
Nukumaru Limestone	350	9.12	17	EXT	NKLS_9.12_#17E_Col_16_a	16	1	NA	NA	NA	NA	192	221	NA	NA	NA	NA	NA	NA	25.02.2019	EDM
Nukumaru Brown Sand	351	9.6	4	INT	NKBS_9.6_#4I_Col_6_a	6	4	NA	NA	NA	NA	184	225	36	89	NA	NA	NA	NA	25.02.2019	EDM
Nukumaru Brown Sand	352	9.6	4	INT	NKBS_9.6_#4I_Col_6_a	6	1	NA	NA	NA	NA	174	217	35	89	NA	NA	NA	NA	25.02.2019	EDM
Nukumaru Brown Sand	353	9.6	4	INT	NKBS_9.6_#4I_Col_6_a	6	7	NA	NA	NA	NA	187	212	39	85	NA	NA	NA	NA	25.02.2019	EDM
Nukumaru Brown Sand	354	9.6	4	INT	NKBS_9.6_#4I_Col_6_a	6	6	NA	NA	NA	NA	174	212	NA	NA	NA	NA	NA	NA	25.02.2019	EDM
Nukumaru Brown Sand	355	9.6	4	INT	NKBS_9.6_#4I_Col_6_a	6	9	NA	NA	NA	NA	209	190	NA	NA	NA	NA	NA	NA	25.02.2019	EDM
Nukumaru Brown Sand	356	9.6	4	INT	NKBS_9.6_#4I_Col_6_a	6	8	NA	NA	NA	NA	187	203	NA	NA	NA	NA	NA	NA	25.02.2019	EDM
Nukumaru Brown Sand	357	9.6	4	INT	NKBS_9.6_#4I_Col_6_c	6	2	NA	NA	NA	NA	165	222	NA	NA	NA	NA	NA	NA	25.02.2019	EDM
Nukumaru Brown Sand	358	9.6	4	INT	NKBS_9.6_#4I_Col_6_c	6	6	NA	NA	NA	NA	179	235	NA	NA	NA	NA	NA	NA	25.02.2019	EDM
Nukumaru Brown Sand	359	9.6	4	INT	NKBS_9.6_#4I_Col_6_c	6	5	NA	NA	NA	NA	169	225	NA	NA	NA	NA	NA	NA	25.02.2019	EDM
Nukumaru Brown Sand	360	9.6	4	INT	NKBS_9.6_#4I_Col_6_c	6	14	453	178	NA	NA	NA	NA	NA	NA	NA	NA	NA	NA	25.02.2019	EDM
Nukumaru Brown Sand	361	9.6	4	INT	NKBS_9.6_#4I_Col_6_c	6	42	413	157	NA	NA	NA	NA	NA	NA	NA	NA	NA	NA	25.02.2019	EDM
Nukumaru Brown Sand	362	9.6	6	EXT	NKBS_9.6_#6E_Col_1_a	1	5	NA	NA	NA	NA	182	226	NA	NA	NA	NA	NA	NA	25.02.2019	EDM
Nukumaru Brown Sand	363	9.6	6	EXT	NKBS_9.6_#6E_Col_1_a	1	2	NA	NA	NA	NA	156	203	NA	NA	NA	NA	NA	NA	25.02.2019	EDM
Nukumaru Brown Sand	364	9.6	6	EXT	NKBS_9.6_#6E_Col_1_a	1	20	394	157	NA	NA	NA	NA	NA	NA	NA	NA	NA	NA	25.02.2019	EDM
Nukumaru Brown Sand	365	9.6	6	EXT	NKBS_9.6_#6E_Col_1_a	1	36	517	147	NA	NA	NA	NA	NA	NA	NA	NA	NA	NA	25.02.2019	EDM
Nukumaru Brown Sand	366	9.6	6	EXT	NKBS_9.6_#6E_Col_2_a	2	43	390	157	NA	NA	NA	NA	NA	NA	NA	NA	NA	NA	25.02.2019	EDM
Nukumaru Brown Sand	367	9.6	6	EXT	NKBS_9.6_#6E_Col_2_a	2	49	451	176	NA	NA	NA	NA	NA	NA	NA	NA	NA	NA	25.02.2019	EDM
Nukumaru Brown Sand	368	9.6	6	EXT	NKBS_9.6_#6E_Col_2_a	2	27	344	171	NA	NA	NA	NA	NA	NA	NA	NA	NA	NA	25.02.2019	EDM
Nukumaru Brown Sand	369	9.6	6	EXT	NKBS_9.6_#6E_Col_2_a	2	51	351	180	NA	NA	NA	NA	NA	NA	NA	NA	NA	NA	25.02.2019	EDM
Nukumaru Brown Sand	370	9.6	6	EXT	NKBS_9.6_#6E_Col_26_a	26	1	NA	NA	NA	NA	186	253	NA	NA	NA	NA	NA	NA	25.02.2019	EDM
Nukumaru Brown Sand	371	9.6	6	EXT	NKBS_9.6_#6E_Col_26_a	26	2	NA	NA	NA	NA	191	262	NA	NA	NA	NA	NA	NA	25.02.2019	EDM
Nukumaru Brown Sand	372	9.6	6	EXT	NKBS_9.6_#6E_Col_26_a	26	3	NA	NA	NA	NA	174	234	NA	NA	NA	NA	NA	NA	25.02.2019	EDM
Nukumaru Brown Sand	373	9.6	7	INT	NKBS_9.6_#7I_Col_5_a	5	1	NA	NA	NA	NA	210	212	NA	NA	NA	NA	NA	NA	25.02.2019	EDM
Nukumaru Brown Sand	374	9.6	7	INT	NKBS_9.6_#7I_Col_5_a	5	2	NA	NA	NA	NA	192	226	NA	NA	NA	NA	NA	NA	25.02.2019	EDM
Nukumaru Brown Sand	375	9.6	7	INT	NKBS_9.6_#7I_Col_5_a	5	26	436	180	66	58	NA	NA	NA	NA	NA	NA	NA	NA	25.02.2019	EDM
Nukumaru Brown Sand	376	9.6	7	INT	NKBS_9.6_#7I_Col_5_a	5	25	468	188	NA	NA	NA	NA	NA	NA	NA	NA	NA	NA	25.02.2019	EDM
Nukumaru Brown Sand	377	9.6	7	INT	NKBS_9.6_#7I_Col_5_a	5	19	415	178	NA	NA	NA	NA	NA	NA	NA	NA	NA	NA	25.02.2019	EDM
Nukumaru Brown Sand	378	9.6	7	INT	NKBS_9.6_#7I_Col_5_a	5	13	401	175	NA	NA	NA	NA	NA	NA	NA	NA	NA	NA	25.02.2019	EDM
Nukumaru Brown Sand	379	9.6	7	INT	NKBS_9.6_#7I_Col_5_a	5	15	345	177	NA	NA	NA	NA	NA	NA	NA	NA	NA	NA	25.02.2019	EDM
Nukumaru Brown Sand	380	9.6	7	INT	NKBS_9.6_#7I_Col_5_a	5	21	399	178	NA	NA	NA	NA	NA	NA	NA	NA	NA	NA	25.02.2019	EDM
Nukumaru Brown Sand	381	9.6	7	INT	NKBS_9.6_#7I_Col_5_a	5	20	388	172	NA	NA	NA	NA	NA	NA	NA	NA	NA	NA	25.02.2019	EDM
Nukumaru Brown Sand	382	9.6	7	INT	NKBS_9.6_#7I_Col_5_b	5	1	NA	NA	NA	NA	189	232	42	79	NA	NA	NA	NA	25.02.2019	EDM
Nukumaru Brown Sand	383	9.6	7	INT	NKBS_9.6_#7I_Col_5_b	5	16	402	170	NA	NA	NA	NA	NA	NA	NA	NA	NA	NA	25.02.2019	EDM
Nukumaru Brown Sand	384	9.6	7	INT	NKBS_9.6_#7I_Col_5_b	5	12	NA	NA	65	61	NA	NA	NA	NA	NA	NA	NA	NA	25.02.2019	EDM
Nukumaru Brown Sand	385	9.6	7	INT	NKBS_9.6_#7I_Col_5_b	5	30	NA	NA	67	58	NA	NA	NA	NA	NA	NA	NA	NA	25.02.2019	EDM
Nukumaru Brown Sand	386	9.6	7	INT	NKBS_9.6_#7I_Col_13_a	13	20	376	227	NA	NA	NA	NA	NA	NA	NA	NA	NA	NA	25.02.2019	EDM
Nukumaru Brown Sand	387	9.6	7	INT	NKBS_9.6_#7I_Col_13_a	13	17	378	174	NA	NA	NA	NA	NA	NA	NA	NA	NA	NA	25.02.2019	EDM
Nukumaru Brown Sand	388	9.6	7	INT	NKBS_9.6_#7I_Col_13_a	13	28	375	193	NA	NA	NA	NA	NA	NA	NA	NA	NA	NA	25.02.2019	EDM
Nukumaru Brown Sand	389	9.6	7	INT	NKBS_9.6_#7I_Col_13_a	13	31	467	204	NA	NA	NA	NA	NA	NA	NA	NA	NA	NA	25.02.2019	EDM
Nukumaru Brown Sand	390	9.6	7	INT	NKBS_9.6_#7I_Col_13_a	13	37	471	198	NA	NA	NA	NA	NA	NA	NA	NA	NA	NA	25.02.2019	EDM
Nukumaru Brown Sand	391	9.6	7	INT	NKBS_9.6_#7I_Col_13_a	13	38	378	184	NA	NA	NA	NA	NA	NA	NA	NA	NA	NA	25.02.2019	EDM
Nukumaru Brown Sand	392	9.6	7	INT	NKBS_9.6_#7I_Col_19_a	19	39	516	227	NA	NA	NA	NA	NA	NA	NA	NA	NA	NA	25.02.2019	EDM
Nukumaru Brown Sand	393	9.6	7	INT	NKBS_9.6_#7I_Col_19_a	19	28	457	219	NA	NA	NA	NA	NA	NA	NA	NA	NA	NA	25.02.2019	EDM
Nukumaru Brown Sand	394	9.6	7	INT	NKBS_9.6_#7I_Col_19_a	19	38	581	216	NA	NA	NA	NA	NA	NA	NA	NA	NA	NA	25.02.2019	EDM
Nukumaru Brown Sand	395	9.6	7	INT	NKBS_9.6_#7I_Col_19_a	19	18	448	235	NA	NA	NA	NA	NA	NA	NA	NA	NA	NA	25.02.2019	EDM
Nukumaru Brown Sand	396	9.6	7	INT	NKBS_9.6_#7I_Col_19_a	19	21	464	268	NA	NA	NA	NA	NA	NA	NA	NA	NA	NA	25.02.2019	EDM
Nukumaru Brown Sand	397	9.6	7	INT	NKBS_9.6_#7I_Col_19_a	19	20	457	251	NA	NA	NA	NA	NA	NA	NA	NA	NA	NA	25.02.2019	EDM
Nukumaru Brown Sand	398	9.6	7	INT	NKBS_9.6_#7I_Col_19_a	19	40	487	241	NA	NA	NA	NA	NA	NA	NA	NA	NA	NA	25.02.2019	EDM
Nukumaru Brown Sand	399	9.6	7	INT	NKBS_9.6_#7I_Col_19_a	19	47	414	222	NA	NA	NA	NA	NA	NA	NA	NA	NA	NA	25.02.2019	EDM
Nukumaru Brown Sand	400	9.6	7	INT	NKBS_9.6_#7I_Col_19_a	19	45	544	223	NA	NA	NA	NA	NA	NA	NA	NA	NA	NA	25.02.2019	EDM
Nukumaru Brown Sand	401	9.6	7	INT	NKBS_9.6_#7I_Col_19_a	19	44	444	229	NA	NA	NA	NA	NA	NA	NA	NA	NA	NA	25.02.2019	EDM
Nukumaru Brown Sand	402	9.6	7	INT	NKBS_9.6_#7I_Col_19_b	19	2	NA	NA	NA	NA	160	244	40	72	NA	NA	NA	NA	25.02.2019	EDM
Nukumaru Brown Sand	403	9.6	7	INT	NKBS_9.6_#7I_Col_19_b	19	1	NA	NA	NA	NA	183	226	39	70	NA	NA	NA	NA	25.02.2019	EDM
Nukumaru Brown Sand	404	9.6	7	INT	NKBS_9.6_#7I_Col_19_b	19	3	NA	NA	NA	NA	176	234	38	72	NA	NA	NA	NA	25.02.2019	EDM
Nukumaru Brown Sand	405	9.6	7	INT	NKBS_9.6_#7I_Col_19_b	19	31	438	222	NA	NA	NA	NA	NA	NA	NA	NA	NA	NA	25.02.2019	EDM
Nukumaru Brown Sand	406	9.6	7	INT	NKBS_9.6_#7I_Col_19_b	19	22	391	223	NA	NA	NA	NA	NA	NA	NA	NA	NA	NA	25.02.2019	EDM
Nukumaru Brown Sand	407	9.6	7	INT	NKBS_9.6_#7I_Col_19_b	19	38	453	255	NA	NA	NA	NA	NA	NA	NA	NA	NA	NA	25.02.2019	EDM
Nukumaru Brown Sand	408	9.6	7	INT	NKBS_9.6_#7I_Col_19_b	19	30	445	211	NA	NA	NA	NA	NA	NA	NA	NA	NA	NA	25.02.2019	EDM
Nukumaru Brown Sand	409	9.6	7	INT	NKBS_9.6_#7I_Col_19_b	19	26	440	188	NA	NA	NA	NA	NA	NA	NA	NA	NA	NA	25.02.2019	EDM
Nukumaru Brown Sand	410	9.6	7	INT	NKBS_9.6_#7I_Col_19_b	19	24	541	208	NA	NA	NA	NA	NA	NA	NA	NA	NA	NA	25.02.2019	EDM
Nukumaru Brown Sand	411	9.6	7	INT	NKBS_9.6_#7I_Col_19_b	19	18	559	240	NA	NA	NA	NA	NA	NA	NA	NA	NA	NA	25.02.2019	EDM
Nukumaru Brown Sand	412	9.6	7	INT	NKBS_9.6_#7I_Col_19_b	19	35	468	230	NA	NA	NA	NA	NA	NA	NA	NA	NA	NA	25.02.2019	EDM
Nukumaru Brown Sand	413	9.6	7	INT	NKBS_9.6_#7I_Col_19_b	19	44	427	189	NA	NA	NA	NA	NA	NA	NA	NA	NA	NA	25.02.2019	EDM
Nukumaru Brown Sand	414	9.6	7	INT	NKBS_9.6_#7I_Col_19_c	19	2	NA	NA	NA	NA	200	217	NA	NA	NA	NA	NA	NA	25.02.2019	EDM
Nukumaru Brown Sand	415	9.6	7	INT	NKBS_9.6_#7I_Col_19_c	19	1	NA	NA	NA	NA	191	234	NA	NA	NA	NA	NA	NA	25.02.2019	EDM
Nukumaru Brown Sand	416	9.6	7	INT	NKBS_9.6_#7I_Col_19_c	19	26	425	219	NA	NA	NA	NA	NA	NA	NA	NA	NA	NA	25.02.2019	EDM
Nukumaru Brown Sand	417	9.6	7	INT	NKBS_9.6_#7I_Col_19_c	19	37	375	180	NA	NA	NA	NA	NA	NA	NA	NA	NA	NA	25.02.2019	EDM
Nukumaru Brown Sand	418	9.6	7	INT	NKBS_9.6_#7I_Col_19_c	19	38	359	182	NA	NA	NA	NA	NA	NA	NA	NA	NA	NA	25.02.2019	EDM
Nukumaru Brown Sand	419	9.6	7	INT	NKBS_9.6_#7I_Col_19_c	19	41	451	194	NA	NA	NA	NA	NA	NA	NA	NA	NA	NA	25.02.2019	EDM
Nukumaru Brown Sand	420	9.6	7	INT	NKBS_9.6_#7I_Col_19_c	19	39	357	195	NA	NA	NA	NA	NA	NA	NA	NA	NA	NA	25.02.2019	EDM
Nukumaru Brown Sand	421	9.6	7	INT	NKBS_9.6_#7I_Col_19_c	19	28	482	185	NA	NA	NA	NA	NA	NA	NA	NA	NA	NA	25.02.2019	EDM
Nukumaru Brown Sand	422	9.6	7	INT	NKBS_9.6_#7I_Col_19_c	19	29	421	223	NA	NA	NA	NA	NA	NA	NA	NA	NA	NA	25.02.2019	EDM
Nukumaru Brown Sand	423	9.6	7	INT	NKBS_9.6_#7I_Col_19_c	19	25	424	214	NA	NA	NA	NA	NA	NA	NA	NA	NA	NA	25.02.2019	EDM
Nukumaru Brown Sand	424	9.6	7	INT	NKBS_9.6_#7I_Col_19_c	19	22	427	207	NA	NA	NA	NA	NA	NA	NA	NA	NA	NA	25.02.2019	EDM
Nukumaru Brown Sand	425	9.6	7	INT	NKBS_9.6_#7I_Col_19_c	19	21	426	220	NA	NA	NA	NA	NA	NA	NA	NA	NA	NA	25.02.2019	EDM
Nukumaru Brown Sand	426	9.6	9	INT	NKBS_9.6_#9I_Col_10_b	10	2	NA	NA	NA	NA	174	253	35	80	NA	NA	NA	NA	25.02.2019	EDM
Nukumaru Brown Sand	427	9.6	9	INT	NKBS_9.6_#9I_Col_10_b	10	1	NA	NA	NA	NA	194	252	NA	NA	NA	NA	NA	NA	25.02.2019	EDM
Nukumaru Brown Sand	428	9.6	9	INT	NKBS_9.6_#9I_Col_10_b	10	3	NA	NA	NA	NA	186	258	42	82	NA	NA	NA	NA	25.02.2019	EDM
Nukumaru Brown Sand	429	9.6	9	INT	NKBS_9.6_#9I_Col_10_b	10	4	NA	NA	NA	NA	191	241	NA	NA	NA	NA	NA	NA	25.02.2019	EDM
Nukumaru Brown Sand	430	9.6	9	INT	NKBS_9.6_#9I_Col_10_b	10	25	NA	NA	63	52	NA	NA	NA	NA	NA	NA	NA	NA	25.02.2019	EDM
Nukumaru Brown Sand	431	9.6	9	INT	NKBS_9.6_#9I_Col_10_b	10	28	NA	NA	71	52	NA	NA	NA	NA	NA	NA	NA	NA	25.02.2019	EDM
Nukumaru Brown Sand	432	9.6	9	INT	NKBS_9.6_#9I_Col_10_b	10	14	398	220	NA	NA	NA	NA	NA	NA	NA	NA	NA	NA	25.02.2019	EDM
Nukumaru Brown Sand	433	9.6	9	INT	NKBS_9.6_#9I_Col_10_b	10	42	463	208	NA	NA	NA	NA	NA	NA	NA	NA	NA	NA	25.02.2019	EDM
Nukumaru Brown Sand	434	9.6	9	INT	NKBS_9.6_#9I_Col_10_b	10	18	500	193	NA	NA	NA	NA	NA	NA	NA	NA	NA	NA	25.02.2019	EDM
Nukumaru Brown Sand	435	9.6	9	INT	NKBS_9.6_#9I_Col_10_b	10	41	456	162	NA	NA	NA	NA	NA	NA	NA	NA	NA	NA	25.02.2019	EDM
Nukumaru Brown Sand	436	9.6	9	INT	NKBS_9.6_#9I_Col_18_a	18	1	NA	NA	NA	NA	192	227	NA	NA	NA	NA	NA	NA	25.02.2019	EDM
Nukumaru Brown Sand	437	9.6	9	INT	NKBS_9.6_#9I_Col_18_a	18	2	NA	NA	NA	NA	200	202	38	67	NA	NA	NA	NA	25.02.2019	EDM
Nukumaru Brown Sand	438	9.6	9	INT	NKBS_9.6_#9I_Col_18_a	18	4	NA	NA	NA	NA	184	229	NA	NA	NA	NA	NA	NA	25.02.2019	EDM
Nukumaru Brown Sand	439	9.6	9	INT	NKBS_9.6_#9I_Col_18_a	18	3	NA	NA	NA	NA	199	210	NA	NA	NA	NA	NA	NA	25.02.2019	EDM
Nukumaru Brown Sand	440	9.6	9	INT	NKBS_9.6_#9I_Col_18_a	18	44	388	200	58	60	NA	NA	NA	NA	NA	NA	NA	NA	25.02.2019	EDM
Nukumaru Brown Sand	441	9.6	9	INT	NKBS_9.6_#9I_Col_18_a	18	31	352	198	NA	NA	NA	NA	NA	NA	NA	NA	NA	NA	25.02.2019	EDM
Nukumaru Brown Sand	442	9.6	9	INT	NKBS_9.6_#9I_Col_18_a	18	30	413	203	NA	NA	NA	NA	NA	NA	NA	NA	NA	NA	25.02.2019	EDM
Nukumaru Brown Sand	443	9.6	9	INT	NKBS_9.6_#9I_Col_18_a	18	25	382	199	NA	NA	NA	NA	NA	NA	NA	NA	NA	NA	25.02.2019	EDM
Nukumaru Brown Sand	444	9.6	9	INT	NKBS_9.6_#9I_Col_18_a	18	41	491	210	NA	NA	NA	NA	NA	NA	NA	NA	NA	NA	25.02.2019	EDM
Nukumaru Brown Sand	445	9.6	9	INT	NKBS_9.6_#9I_Col_18_a	18	38	394	214	NA	NA	NA	NA	NA	NA	NA	NA	NA	NA	25.02.2019	EDM
Nukumaru Brown Sand	446	9.6	16	EXT	NKBS_9.6_#16E_Col_5_a	5	21	561	171	NA	NA	NA	NA	NA	NA	NA	NA	NA	NA	25.02.2019	EDM
Nukumaru Brown Sand	447	9.6	16	EXT	NKBS_9.6_#16E_Col_5_a	5	28	534	183	NA	NA	NA	NA	NA	NA	NA	NA	NA	NA	25.02.2019	EDM
Nukumaru Brown Sand	448	9.6	16	EXT	NKBS_9.6_#16E_Col_5_a	5	22	397	200	NA	NA	NA	NA	NA	NA	NA	NA	NA	NA	25.02.2019	EDM
Nukumaru Brown Sand	449	9.6	16	EXT	NKBS_9.6_#16E_Col_5_a	5	39	493	184	NA	NA	NA	NA	NA	NA	NA	NA	NA	NA	25.02.2019	EDM
Nukumaru Brown Sand	450	9.6	16	EXT	NKBS_9.6_#16E_Col_5_a	5	38	477	184	NA	NA	NA	NA	NA	NA	NA	NA	NA	NA	25.02.2019	EDM
Nukumaru Brown Sand	451	9.6	16	EXT	NKBS_9.6_#16E_Col_5_a	5	43	411	158	NA	NA	NA	NA	NA	NA	NA	NA	NA	NA	25.02.2019	EDM
Nukumaru Brown Sand	452	9.6	16	EXT	NKBS_9.6_#16E_Col_5_a	5	32	429	192	NA	NA	NA	NA	NA	NA	NA	NA	NA	NA	25.02.2019	EDM
Nukumaru Brown Sand	453	9.6	16	EXT	NKBS_9.6_#16E_Col_5_a	5	2	NA	NA	NA	NA	210	253	NA	NA	NA	NA	NA	NA	25.02.2019	EDM
Nukumaru Brown Sand	454	9.6	16	EXT	NKBS_9.6_#16E_Col_5_a	5	3	NA	NA	NA	NA	219	231	NA	NA	NA	NA	NA	NA	25.02.2019	EDM
Nukumaru Brown Sand	455	9.6	16	EXT	NKBS_9.6_#16E_Col_5_b	5	10	NA	NA	NA	NA	204	257	33	69	NA	NA	NA	NA	25.02.2019	EDM
Nukumaru Brown Sand	456	9.6	16	EXT	NKBS_9.6_#16E_Col_5_b	5	4	NA	NA	NA	NA	192	252	34	66	NA	NA	NA	NA	25.02.2019	EDM
Nukumaru Brown Sand	457	9.6	16	EXT	NKBS_9.6_#16E_Col_5_b	5	1	NA	NA	NA	NA	174	256	NA	NA	NA	NA	NA	NA	25.02.2019	EDM
Nukumaru Brown Sand	458	9.6	16	EXT	NKBS_9.6_#16E_Col_5_b	5	2	NA	NA	NA	NA	183	253	NA	NA	NA	NA	NA	NA	25.02.2019	EDM
Nukumaru Brown Sand	459	9.6	16	EXT	NKBS_9.6_#16E_Col_5_b	5	5	NA	NA	NA	NA	184	212	34	63	NA	NA	NA	NA	25.02.2019	EDM
Nukumaru Brown Sand	460	9.6	16	EXT	NKBS_9.6_#16E_Col_5_b	5	6	NA	NA	NA	NA	189	266	40	61	NA	NA	NA	NA	25.02.2019	EDM
Nukumaru Brown Sand	461	9.6	16	EXT	NKBS_9.6_#16E_Col_5_b	5	7	NA	NA	NA	NA	182	244	44	69	NA	NA	NA	NA	25.02.2019	EDM
Nukumaru Brown Sand	462	9.6	16	EXT	NKBS_9.6_#16E_Col_5_b	5	8	NA	NA	NA	NA	206	243	NA	NA	NA	NA	NA	NA	25.02.2019	EDM
Nukumaru Brown Sand	463	9.6	16	EXT	NKBS_9.6_#16E_Col_5_b	5	15	396	196	NA	NA	NA	NA	NA	NA	NA	NA	NA	NA	25.02.2019	EDM
Nukumaru Brown Sand	464	9.6	16	EXT	NKBS_9.6_#16E_Col_5_b	5	13	441	190	NA	NA	NA	NA	NA	NA	NA	NA	NA	NA	25.02.2019	EDM
Nukumaru Brown Sand	465	9.6	16	EXT	NKBS_9.6_#16E_Col_5_b	5	31	462	175	NA	NA	NA	NA	NA	NA	NA	NA	NA	NA	25.02.2019	EDM
Nukumaru Brown Sand	466	9.6	16	EXT	NKBS_9.6_#16E_Col_5_b	5	38	528	185	NA	NA	NA	NA	NA	NA	NA	NA	NA	NA	25.02.2019	EDM
Nukumaru Brown Sand	467	9.6	16	EXT	NKBS_9.6_#16E_Col_5_b	5	29	492	188	NA	NA	NA	NA	NA	NA	NA	NA	NA	NA	25.02.2019	EDM
Nukumaru Brown Sand	468	9.6	16	EXT	NKBS_9.6_#16E_Col_5_b	5	17	407	196	NA	NA	NA	NA	NA	NA	NA	NA	NA	NA	25.02.2019	EDM
Nukumaru Brown Sand	469	9.6	16	EXT	NKBS_9.6_#16E_Col_6_a	6	9	NA	NA	NA	NA	222	243	37	70	NA	NA	NA	NA	25.02.2019	EDM
Nukumaru Brown Sand	470	9.6	16	EXT	NKBS_9.6_#16E_Col_6_a	6	31	394	211	NA	NA	NA	NA	NA	NA	NA	NA	NA	NA	25.02.2019	EDM
Nukumaru Brown Sand	471	9.6	16	EXT	NKBS_9.6_#16E_Col_6_a	6	49	409	181	NA	NA	NA	NA	NA	NA	NA	NA	NA	NA	25.02.2019	EDM
Nukumaru Brown Sand	472	9.6	16	EXT	NKBS_9.6_#16E_Col_6_a	6	46	378	149	NA	NA	NA	NA	NA	NA	NA	NA	NA	NA	25.02.2019	EDM
Nukumaru Brown Sand	473	9.6	16	EXT	NKBS_9.6_#16E_Col_6_a	6	26	437	179	NA	NA	NA	NA	NA	NA	NA	NA	NA	NA	25.02.2019	EDM
Nukumaru Brown Sand	474	9.6	16	EXT	NKBS_9.6_#16E_Col_6_a	6	25	441	197	NA	NA	NA	NA	NA	NA	NA	NA	NA	NA	25.02.2019	EDM
Nukumaru Brown Sand	475	9.6	16	EXT	NKBS_9.6_#16E_Col_6_a	6	11	NA	NA	NA	NA	207	256	45	83	NA	NA	NA	NA	25.02.2019	EDM
Nukumaru Brown Sand	476	9.6	16	EXT	NKBS_9.6_#16E_Col_6_a	6	43	NA	NA	65	59	NA	NA	NA	NA	NA	NA	NA	NA	25.02.2019	EDM
Nukumaru Brown Sand	477	9.6	17	EXT	NKBS_9.6_#17E_Col_9_a	9	4	NA	NA	NA	NA	187	224	46	68	NA	NA	NA	NA	25.02.2019	EDM
Nukumaru Brown Sand	478	9.6	17	EXT	NKBS_9.6_#17E_Col_9_a	9	1	NA	NA	NA	NA	174	242	47	72	NA	NA	NA	NA	25.02.2019	EDM
Nukumaru Brown Sand	479	9.6	17	EXT	NKBS_9.6_#17E_Col_9_a	9	2	NA	NA	NA	NA	172	220	52	77	NA	NA	NA	NA	25.02.2019	EDM
Nukumaru Brown Sand	480	9.6	17	EXT	NKBS_9.6_#17E_Col_9_a	9	8	NA	NA	NA	NA	182	248	45	76	NA	NA	NA	NA	25.02.2019	EDM
Nukumaru Brown Sand	481	9.6	17	EXT	NKBS_9.6_#17E_Col_9_a	9	5	NA	NA	NA	NA	161	241	38	78	NA	NA	NA	NA	25.02.2019	EDM
Nukumaru Brown Sand	482	9.6	17	EXT	NKBS_9.6_#17E_Col_9_a	9	6	NA	NA	NA	NA	173	239	46	66	NA	NA	NA	NA	25.02.2019	EDM
Nukumaru Brown Sand	483	9.6	17	EXT	NKBS_9.6_#17E_Col_9_a	9	7	NA	NA	NA	NA	167	232	NA	NA	NA	NA	NA	NA	25.02.2019	EDM
Nukumaru Brown Sand	484	9.6	17	EXT	NKBS_9.6_#17E_Col_9_a	9	45	344	184	NA	NA	NA	NA	NA	NA	NA	NA	NA	NA	25.02.2019	EDM
Nukumaru Brown Sand	485	9.6	17	EXT	NKBS_9.6_#17E_Col_9_a	9	48	416	195	NA	NA	NA	NA	NA	NA	NA	NA	NA	NA	25.02.2019	EDM
Nukumaru Brown Sand	486	9.6	17	EXT	NKBS_9.6_#17E_Col_9_a	9	52	424	204	NA	NA	NA	NA	NA	NA	NA	NA	NA	NA	25.02.2019	EDM
Nukumaru Brown Sand	487	9.6	17	EXT	NKBS_9.6_#17E_Col_9_a	9	27	NA	NA	65	55	NA	NA	NA	NA	NA	NA	NA	NA	25.02.2019	EDM
Nukumaru Brown Sand	488	9.6	17	EXT	NKBS_9.6_#17E_Col_9_a	9	55	366	209	NA	NA	NA	NA	NA	NA	NA	NA	NA	NA	25.02.2019	EDM
Nukumaru Brown Sand	489	9.6	17	EXT	NKBS_9.6_#17E_Col_9_a	9	59	NA	NA	61	55	NA	NA	NA	NA	NA	NA	NA	NA	25.02.2019	EDM
Nukumaru Brown Sand	490	9.6	17	EXT	NKBS_9.6_#17E_Col_9_a	9	53	NA	NA	65	57	NA	NA	NA	NA	NA	NA	NA	NA	25.02.2019	EDM
Nukumaru Brown Sand	491	9.6	17	EXT	NKBS_9.6_#17E_Col_9_a	9	58	NA	NA	61	59	NA	NA	NA	NA	NA	NA	NA	NA	25.02.2019	EDM
Nukumaru Brown Sand	492	9.6	17	EXT	NKBS_9.6_#17E_Col_9_a	9	14	NA	NA	NA	NA	NA	NA	NA	NA	NA	NA	31	25	25.02.2019	EDM
Nukumaru Brown Sand	493	9.6	17	EXT	NKBS_9.6_#17E_Col_9_a	9	10	NA	NA	NA	NA	NA	NA	NA	NA	246	175	NA	NA	25.02.2019	EDM
Nukumaru Brown Sand	494	9.6	17	EXT	NKBS_9.6_#17E_Col_9_a	9	9	NA	NA	NA	NA	NA	NA	NA	NA	219	167	NA	NA	25.02.2019	EDM
Nukumaru Brown Sand	495	9.6	17	EXT	NKBS_9.6_#17E_Col_9_c	9	4	NA	NA	NA	NA	184	261	43	75	NA	NA	NA	NA	25.02.2019	EDM
Nukumaru Brown Sand	496	9.6	17	EXT	NKBS_9.6_#17E_Col_9_c	9	1	NA	NA	NA	NA	200	222	NA	NA	NA	NA	NA	NA	25.02.2019	EDM
Nukumaru Brown Sand	497	9.6	17	EXT	NKBS_9.6_#17E_Col_9_c	9	2	NA	NA	NA	NA	195	245	NA	NA	NA	NA	NA	NA	25.02.2019	EDM
Nukumaru Brown Sand	498	9.6	17	EXT	NKBS_9.6_#17E_Col_9_c	9	31	349	217	NA	NA	NA	NA	NA	NA	NA	NA	NA	NA	25.02.2019	EDM
Nukumaru Brown Sand	499	9.6	17	EXT	NKBS_9.6_#17E_Col_9_c	9	32	367	222	NA	NA	NA	NA	NA	NA	NA	NA	NA	NA	25.02.2019	EDM
Nukumaru Brown Sand	500	9.6	17	EXT	NKBS_9.6_#17E_Col_9_c	9	60	311	212	NA	NA	NA	NA	NA	NA	NA	NA	NA	NA	25.02.2019	EDM
Nukumaru Brown Sand	501	9.6	17	EXT	NKBS_9.6_#17E_Col_9_d	9	1	NA	NA	NA	NA	188	235	42	80	NA	NA	NA	NA	25.02.2019	EDM
Nukumaru Brown Sand	502	9.6	17	EXT	NKBS_9.6_#17E_Col_9_d	9	3	NA	NA	NA	NA	180	253	44	76	NA	NA	NA	NA	25.02.2019	EDM
Nukumaru Brown Sand	503	9.6	17	EXT	NKBS_9.6_#17E_Col_9_d	9	2	NA	NA	NA	NA	178	234	NA	NA	NA	NA	NA	NA	25.02.2019	EDM
Nukumaru Brown Sand	504	9.6	17	EXT	NKBS_9.6_#17E_Col_9_d	9	4	NA	NA	NA	NA	167	250	36	78	NA	NA	NA	NA	25.02.2019	EDM
Nukumaru Brown Sand	505	9.6	17	EXT	NKBS_9.6_#17E_Col_9_d	9	5	NA	NA	NA	NA	176	231	44	76	NA	NA	NA	NA	25.02.2019	EDM
Nukumaru Brown Sand	506	9.6	17	EXT	NKBS_9.6_#17E_Col_9_d	9	41	457	222	62	58	NA	NA	NA	NA	NA	NA	NA	NA	25.02.2019	EDM
Nukumaru Brown Sand	507	9.6	17	EXT	NKBS_9.6_#17E_Col_9_d	9	42	567	194	NA	NA	NA	NA	NA	NA	NA	NA	NA	NA	25.02.2019	EDM
Nukumaru Brown Sand	508	9.6	17	EXT	NKBS_9.6_#17E_Col_9_d	9	22	420	211	NA	NA	NA	NA	NA	NA	NA	NA	NA	NA	25.02.2019	EDM
Nukumaru Brown Sand	509	9.6	17	EXT	NKBS_9.6_#17E_Col_9_d	9	24	332	179	NA	NA	NA	NA	NA	NA	NA	NA	NA	NA	25.02.2019	EDM
Nukumaru Brown Sand	510	9.6	17	EXT	NKBS_9.6_#17E_Col_9_d	9	21	438	213	NA	NA	NA	NA	NA	NA	NA	NA	NA	NA	25.02.2019	EDM
Nukumaru Brown Sand	511	9.6	17	EXT	NKBS_9.6_#17E_Col_9_d	9	35	377	205	NA	NA	NA	NA	NA	NA	NA	NA	NA	NA	25.02.2019	EDM
Nukumaru Brown Sand	512	9.6	17	EXT	NKBS_9.6_#17E_Col_9_d	9	34	361	189	NA	NA	NA	NA	NA	NA	NA	NA	NA	NA	25.02.2019	EDM
Nukumaru Brown Sand	513	9.6	17	EXT	NKBS_9.6_#17E_Col_9_d	9	39	NA	NA	66	56	NA	NA	NA	NA	NA	NA	NA	NA	25.02.2019	EDM
Nukumaru Brown Sand	514	9.25	10	INT	NKBS_9.25_#10I_Col_8_a	8	7	387	238	NA	NA	NA	NA	NA	NA	NA	NA	NA	NA	25.02.2019	EDM
Nukumaru Brown Sand	515	9.25	10	INT	NKBS_9.25_#10I_Col_8_a	8	15	375	184	NA	NA	NA	NA	NA	NA	NA	NA	NA	NA	25.02.2019	EDM
Nukumaru Brown Sand	516	9.25	10	INT	NKBS_9.25_#10I_Col_8_a	8	5	358	183	NA	NA	NA	NA	NA	NA	NA	NA	NA	NA	25.02.2019	EDM
Nukumaru Brown Sand	517	9.25	10	INT	NKBS_9.25_#10I_Col_8_a	8	9	419	200	NA	NA	NA	NA	NA	NA	NA	NA	NA	NA	25.02.2019	EDM
Lower Kai-iwi Shellbed	518	9.37	3	EXT	Lower_Kai_iwi_9.37_#3E_Col_2_b	2	9	NA	NA	NA	NA	187	304	NA	NA	NA	NA	NA	NA	26.02.2019	EDM
Lower Kai-iwi Shellbed	519	9.37	3	EXT	Lower_Kai_iwi_9.37_#3E_Col_2_b	2	17	NA	NA	NA	NA	206	301	NA	NA	NA	NA	NA	NA	26.02.2019	EDM
Lower Kai-iwi Shellbed	520	9.37	3	EXT	Lower_Kai_iwi_9.37_#3E_Col_2_b	2	26	NA	NA	NA	NA	202	300	NA	NA	NA	NA	NA	NA	26.02.2019	EDM
Lower Kai-iwi Shellbed	521	58	7	EXT	Lower_Kai_iwi_58_#7E_Col_2_a	2	10	NA	NA	NA	NA	160	206	NA	NA	NA	NA	NA	NA	26.02.2019	EDM
Lower Kai-iwi Shellbed	522	58	7	EXT	Lower_Kai_iwi_58_#7E_Col_7_a	7	1	NA	NA	NA	NA	206	281	NA	NA	NA	NA	NA	NA	26.02.2019	EDM
Lower Kai-iwi Shellbed	523	58	8	EXT	Lower_Kai_iwi_58_#8E_Col_1_a	1	1	NA	NA	NA	NA	193	251	NA	NA	NA	NA	NA	NA	26.02.2019	EDM
Lower Kai-iwi Shellbed	524	58	8	EXT	Lower_Kai_iwi_58_#8E_Col_1_a	1	20	484	250	NA	NA	NA	NA	NA	NA	NA	NA	NA	NA	26.02.2019	EDM
Lower Kai-iwi Shellbed	525	58	8	EXT	Lower_Kai_iwi_58_#8E_Col_7_a	7	18	428	258	NA	NA	NA	NA	NA	NA	NA	NA	NA	NA	26.02.2019	EDM
Lower Kai-iwi Shellbed	526	58	8	EXT	Lower_Kai_iwi_58_#8E_Col_7_a	7	27	417	227	NA	NA	NA	NA	NA	NA	NA	NA	NA	NA	26.02.2019	EDM
Lower Kai-iwi Shellbed	527	58	8	EXT	Lower_Kai_iwi_58_#8E_Col_7_a	7	16	446	203	NA	NA	NA	NA	NA	NA	NA	NA	NA	NA	26.02.2019	EDM
Lower Kai-iwi Shellbed	528	58	24	EXT	Lower_Kai_iwi_58_#24E_Col_9_a	9	1	NA	NA	NA	NA	186	261	NA	NA	NA	NA	NA	NA	26.02.2019	EDM
Lower Kai-iwi Shellbed	529	58	24	EXT	Lower_Kai_iwi_58_#24E_Col_9_a	9	2	NA	NA	NA	NA	170	265	45	82	NA	NA	NA	NA	26.02.2019	EDM
Lower Kai-iwi Shellbed	530	58	24	EXT	Lower_Kai_iwi_58_#24E_Col_9_a	9	30	426	249	NA	NA	NA	NA	NA	NA	NA	NA	NA	NA	26.02.2019	EDM
Lower Kai-iwi Shellbed	531	58	24	EXT	Lower_Kai_iwi_58_#24E_Col_9_a	9	27	516	264	NA	NA	NA	NA	NA	NA	NA	NA	NA	NA	26.02.2019	EDM
Lower Kai-iwi Shellbed	532	58	24	EXT	Lower_Kai_iwi_58_#24E_Col_9_b	9	1	NA	NA	NA	NA	182	254	NA	NA	NA	NA	NA	NA	26.02.2019	EDM
Lower Kai-iwi Shellbed	533	58	24	EXT	Lower_Kai_iwi_58_#24E_Col_9_b	9	2	NA	NA	NA	NA	181	250	NA	NA	NA	NA	NA	NA	26.02.2019	EDM
Lower Kai-iwi Shellbed	534	58	25	EXT	Lower_Kai_iwi_58_#25E_Col_1_a	1	1	NA	NA	NA	NA	177	324	NA	NA	NA	NA	NA	NA	26.02.2019	EDM
Lower Kai-iwi Shellbed	535	58	25	EXT	Lower_Kai_iwi_58_#25E_Col_1_a	1	2	NA	NA	NA	NA	187	264	NA	NA	NA	NA	NA	NA	26.02.2019	EDM
Lower Kai-iwi Shellbed	536	58	25	EXT	Lower_Kai_iwi_58_#25E_Col_1_a	1	3	NA	NA	NA	NA	183	304	NA	NA	NA	NA	NA	NA	26.02.2019	EDM
Lower Kai-iwi Shellbed	537	58	25	EXT	Lower_Kai_iwi_58_#25E_Col_1_a	1	5	NA	NA	NA	NA	182	305	NA	NA	NA	NA	NA	NA	26.02.2019	EDM
Lower Kai-iwi Shellbed	538	58	25	EXT	Lower_Kai_iwi_58_#25E_Col_1_a	1	24	436	271	NA	NA	NA	NA	NA	NA	NA	NA	NA	NA	26.02.2019	EDM
Lower Kai-iwi Shellbed	539	58	25	EXT	Lower_Kai_iwi_58_#25E_Col_1_a	1	20	508	258	NA	NA	NA	NA	NA	NA	NA	NA	NA	NA	26.02.2019	EDM
Lower Kai-iwi Shellbed	540	58	25	EXT	Lower_Kai_iwi_58_#25E_Col_1_a	1	35	501	271	NA	NA	NA	NA	NA	NA	NA	NA	NA	NA	26.02.2019	EDM
Lower Kai-iwi Shellbed	541	58	25	EXT	Lower_Kai_iwi_58_#25E_Col_1_a	1	19	425	272	NA	NA	NA	NA	NA	NA	NA	NA	NA	NA	26.02.2019	EDM
Lower Kai-iwi Shellbed	542	58	25	EXT	Lower_Kai_iwi_58_#25E_Col_3_a	3	2	NA	NA	NA	NA	190	289	NA	NA	NA	NA	NA	NA	26.02.2019	EDM
Lower Kai-iwi Shellbed	543	58	25	EXT	Lower_Kai_iwi_58_#25E_Col_3_a	3	1	NA	NA	NA	NA	205	272	NA	NA	NA	NA	NA	NA	26.02.2019	EDM
Lower Kai-iwi Shellbed	544	58	25	EXT	Lower_Kai_iwi_58_#25E_Col_3_a	3	7	NA	NA	NA	NA	173	267	NA	NA	NA	NA	NA	NA	26.02.2019	EDM
Lower Kai-iwi Shellbed	545	58	25	EXT	Lower_Kai_iwi_58_#25E_Col_3_a	3	10	NA	NA	NA	NA	184	272	NA	NA	NA	NA	NA	NA	26.02.2019	EDM
Lower Kai-iwi Shellbed	546	58	25	EXT	Lower_Kai_iwi_58_#25E_Col_3_a	3	9	NA	NA	NA	NA	207	288	NA	NA	NA	NA	NA	NA	26.02.2019	EDM
Lower Kai-iwi Shellbed	547	58	25	EXT	Lower_Kai_iwi_58_#25E_Col_3_a	3	4	NA	NA	NA	NA	214	276	NA	NA	NA	NA	NA	NA	26.02.2019	EDM
Lower Kai-iwi Shellbed	548	58	25	EXT	Lower_Kai_iwi_58_#25E_Col_3_a	3	3	NA	NA	NA	NA	215	264	NA	NA	NA	NA	NA	NA	26.02.2019	EDM
Lower Kai-iwi Shellbed	549	58	25	EXT	Lower_Kai_iwi_58_#25E_Col_3_a	3	21	393	257	NA	NA	NA	NA	NA	NA	NA	NA	NA	NA	26.02.2019	EDM
Lower Kai-iwi Shellbed	550	58	25	EXT	Lower_Kai_iwi_58_#25E_Col_3_a	3	27	450	255	NA	NA	NA	NA	NA	NA	NA	NA	NA	NA	26.02.2019	EDM
Lower Kai-iwi Shellbed	551	58	25	EXT	Lower_Kai_iwi_58_#25E_Col_3_a	3	17	423	238	NA	NA	NA	NA	NA	NA	NA	NA	NA	NA	26.02.2019	EDM
Lower Kai-iwi Shellbed	552	58	25	EXT	Lower_Kai_iwi_58_#25E_Col_3_a	3	29	402	227	NA	NA	NA	NA	NA	NA	NA	NA	NA	NA	26.02.2019	EDM
Lower Kai-iwi Shellbed	553	58	25	EXT	Lower_Kai_iwi_58_#25E_Col_3_a	3	16	427	291	NA	NA	NA	NA	NA	NA	NA	NA	NA	NA	26.02.2019	EDM
Lower Kai-iwi Shellbed	554	58	25	EXT	Lower_Kai_iwi_58_#25E_Col_5_a	5	2	NA	NA	NA	NA	175	279	NA	NA	NA	NA	NA	NA	26.02.2019	EDM
Lower Kai-iwi Shellbed	555	58	25	EXT	Lower_Kai_iwi_58_#25E_Col_5_a	5	1	NA	NA	NA	NA	190	291	NA	NA	NA	NA	NA	NA	26.02.2019	EDM
Lower Kai-iwi Shellbed	556	58	25	EXT	Lower_Kai_iwi_58_#25E_Col_5_a	5	3	NA	NA	NA	NA	198	249	NA	NA	NA	NA	NA	NA	26.02.2019	EDM
Lower Kai-iwi Shellbed	557	59	25	EXT	Lower_Kai_iwi_59_#25E_Col_1_a	1	2	NA	NA	NA	NA	161	255	NA	NA	NA	NA	NA	NA	26.02.2019	EDM
Lower Kai-iwi Shellbed	558	59	25	EXT	Lower_Kai_iwi_59_#25E_Col_1_a	1	1	NA	NA	NA	NA	180	249	NA	NA	NA	NA	NA	NA	26.02.2019	EDM
Lower Kai-iwi Shellbed	559	60	1	EXT	Lower_Kai_iwi_60_#1E_Col_1_a	1	33	478	258	75	67	NA	NA	NA	NA	NA	NA	NA	NA	26.02.2019	EDM
Lower Kai-iwi Shellbed	560	60	1	EXT	Lower_Kai_iwi_60_#1E_Col_1_a	1	32	543	221	72	63	NA	NA	NA	NA	NA	NA	NA	NA	26.02.2019	EDM
Lower Kai-iwi Shellbed	561	60	1	EXT	Lower_Kai_iwi_60_#1E_Col_1_a	1	31	511	261	NA	NA	NA	NA	NA	NA	NA	NA	NA	NA	26.02.2019	EDM
Lower Kai-iwi Shellbed	562	60	1	EXT	Lower_Kai_iwi_60_#1E_Col_1_a	1	28	438	226	57	65	NA	NA	NA	NA	NA	NA	NA	NA	26.02.2019	EDM
Lower Kai-iwi Shellbed	563	60	1	EXT	Lower_Kai_iwi_60_#1E_Col_1_a	1	34	496	210	72	59	NA	NA	NA	NA	NA	NA	NA	NA	26.02.2019	EDM
Lower Kai-iwi Shellbed	564	60	1	EXT	Lower_Kai_iwi_60_#1E_Col_1_a	1	35	554	233	NA	NA	NA	NA	NA	NA	NA	NA	NA	NA	26.02.2019	EDM
Lower Kai-iwi Shellbed	565	60	1	EXT	Lower_Kai_iwi_60_#1E_Col_1_a	1	22	426	215	NA	NA	NA	NA	NA	NA	NA	NA	NA	NA	26.02.2019	EDM
Lower Kai-iwi Shellbed	566	60	1	EXT	Lower_Kai_iwi_60_#1E_Col_1_a	1	26	412	228	NA	NA	NA	NA	NA	NA	NA	NA	NA	NA	26.02.2019	EDM
Lower Kai-iwi Shellbed	567	60	1	EXT	Lower_Kai_iwi_60_#1E_Col_1_a	1	27	481	214	NA	NA	NA	NA	NA	NA	NA	NA	NA	NA	26.02.2019	EDM
Lower Kai-iwi Shellbed	568	60	1	EXT	Lower_Kai_iwi_60_#1E_Col_1_a	1	20	412	234	NA	NA	NA	NA	NA	NA	NA	NA	NA	NA	26.02.2019	EDM
Lower Kai-iwi Shellbed	569	60	1	EXT	Lower_Kai_iwi_60_#1E_Col_1_a	1	9	NA	NA	NA	NA	NA	NA	NA	NA	318	198	NA	NA	26.02.2019	EDM
Lower Kai-iwi Shellbed	570	60	1	EXT	Lower_Kai_iwi_60_#1E_Col_1_a	1	13	NA	NA	NA	NA	NA	NA	NA	NA	260	212	NA	NA	26.02.2019	EDM
Lower Kai-iwi Shellbed	571	60	1	EXT	Lower_Kai_iwi_60_#1E_Col_1_a	1	8	NA	NA	NA	NA	NA	NA	NA	NA	352	166	NA	NA	26.02.2019	EDM
Lower Kai-iwi Shellbed	572	60	1	EXT	Lower_Kai_iwi_60_#1E_Col_1_a	1	5	NA	NA	NA	NA	NA	NA	NA	NA	283	218	NA	NA	26.02.2019	EDM
Lower Kai-iwi Shellbed	573	60	1	EXT	Lower_Kai_iwi_60_#1E_Col_1_a	1	3	NA	NA	NA	NA	NA	NA	NA	NA	270	169	NA	NA	26.02.2019	EDM
Lower Kai-iwi Shellbed	574	60	1	EXT	Lower_Kai_iwi_60_#1E_Col_1_a	1	21	NA	NA	65	58	NA	NA	NA	NA	NA	NA	NA	NA	26.02.2019	EDM
Lower Kai-iwi Shellbed	575	60	3	EXT	Lower_Kai_iwi_60_#3E_Col_1_a	1	1	NA	NA	NA	NA	183	276	40	78	NA	NA	NA	NA	26.02.2019	EDM
Lower Kai-iwi Shellbed	576	60	4	EXT	Lower_Kai_iwi_60_#4E_Col_1_a	1	1	NA	NA	NA	NA	182	246	NA	NA	NA	NA	NA	NA	26.02.2019	EDM
Lower Kai-iwi Shellbed	577	60	4	EXT	Lower_Kai_iwi_60_#4E_Col_1_a	1	10	NA	NA	NA	NA	NA	NA	NA	NA	NA	NA	34	30	26.02.2019	EDM
Lower Kai-iwi Shellbed	578	60	4	EXT	Lower_Kai_iwi_60_#4E_Col_1_a	1	30	459	220	NA	NA	NA	NA	NA	NA	NA	NA	NA	NA	26.02.2019	EDM
Lower Kai-iwi Shellbed	579	60	4	EXT	Lower_Kai_iwi_60_#4E_Col_1_a	1	31	431	267	NA	NA	NA	NA	NA	NA	NA	NA	NA	NA	26.02.2019	EDM
Lower Kai-iwi Shellbed	580	60	4	EXT	Lower_Kai_iwi_60_#4E_Col_1_a	1	32	448	232	NA	NA	NA	NA	NA	NA	NA	NA	NA	NA	26.02.2019	EDM
Lower Kai-iwi Shellbed	581	60	4	EXT	Lower_Kai_iwi_60_#4E_Col_1_a	1	28	522	226	NA	NA	NA	NA	NA	NA	NA	NA	NA	NA	26.02.2019	EDM
Lower Kai-iwi Shellbed	582	60	4	EXT	Lower_Kai_iwi_60_#4E_Col_2_a	2	2	NA	NA	NA	NA	178	270	47	90	NA	NA	NA	NA	26.02.2019	EDM
Lower Kai-iwi Shellbed	583	60	4	EXT	Lower_Kai_iwi_60_#4E_Col_2_a	2	1	NA	NA	NA	NA	168	264	48	93	NA	NA	NA	NA	26.02.2019	EDM
Lower Kai-iwi Shellbed	584	60	4	EXT	Lower_Kai_iwi_60_#4E_Col_2_a	2	3	NA	NA	NA	NA	172	263	51	89	NA	NA	NA	NA	26.02.2019	EDM
Lower Kai-iwi Shellbed	585	60	4	EXT	Lower_Kai_iwi_60_#4E_Col_2_a	2	17	371	234	NA	NA	NA	NA	NA	NA	NA	NA	NA	NA	26.02.2019	EDM
Lower Kai-iwi Shellbed	586	60	4	EXT	Lower_Kai_iwi_60_#4E_Col_2_a	2	21	510	245	NA	NA	NA	NA	NA	NA	NA	NA	NA	NA	26.02.2019	EDM
Lower Kai-iwi Shellbed	587	60	4	EXT	Lower_Kai_iwi_60_#4E_Col_2_a	2	13	575	247	NA	NA	NA	NA	NA	NA	NA	NA	NA	NA	26.02.2019	EDM
Lower Kai-iwi Shellbed	588	60	4	EXT	Lower_Kai_iwi_60_#4E_Col_2_a	2	12	516	260	NA	NA	NA	NA	NA	NA	NA	NA	NA	NA	26.02.2019	EDM
Lower Kai-iwi Shellbed	589	60	5	EXT	Lower_Kai_iwi_60_#5E_Col_1_a	1	4	NA	NA	NA	NA	177	250	NA	NA	NA	NA	NA	NA	26.02.2019	EDM
Lower Kai-iwi Shellbed	590	60	5	EXT	Lower_Kai_iwi_60_#5E_Col_1_a	1	2	NA	NA	NA	NA	197	239	NA	NA	NA	NA	NA	NA	26.02.2019	EDM
Lower Kai-iwi Shellbed	591	60	5	EXT	Lower_Kai_iwi_60_#5E_Col_1_a	1	5	NA	NA	NA	NA	174	233	NA	NA	NA	NA	NA	NA	26.02.2019	EDM
Lower Kai-iwi Shellbed	592	60	5	EXT	Lower_Kai_iwi_60_#5E_Col_1_a	1	6	NA	NA	NA	NA	222	246	NA	NA	NA	NA	NA	NA	26.02.2019	EDM
Lower Kai-iwi Shellbed	593	60	5	EXT	Lower_Kai_iwi_60_#5E_Col_1_a	1	1	NA	NA	NA	NA	190	238	NA	NA	NA	NA	NA	NA	26.02.2019	EDM
Lower Kai-iwi Shellbed	594	60	5	EXT	Lower_Kai_iwi_60_#5E_Col_1_a	1	33	492	232	NA	NA	NA	NA	NA	NA	NA	NA	NA	NA	26.02.2019	EDM
Lower Kai-iwi Shellbed	595	60	5	EXT	Lower_Kai_iwi_60_#5E_Col_1_a	1	32	431	236	NA	NA	NA	NA	NA	NA	NA	NA	NA	NA	26.02.2019	EDM
Lower Kai-iwi Shellbed	596	60	5	EXT	Lower_Kai_iwi_60_#5E_Col_1_a	1	39	560	213	NA	NA	NA	NA	NA	NA	NA	NA	NA	NA	26.02.2019	EDM
Lower Kai-iwi Shellbed	597	60	5	EXT	Lower_Kai_iwi_60_#5E_Col_1_b	1	2	NA	NA	NA	NA	183	265	NA	NA	NA	NA	NA	NA	26.02.2019	EDM
Lower Kai-iwi Shellbed	598	60	5	EXT	Lower_Kai_iwi_60_#5E_Col_1_b	1	5	NA	NA	NA	NA	187	249	NA	NA	NA	NA	NA	NA	26.02.2019	EDM
Lower Kai-iwi Shellbed	599	60	5	EXT	Lower_Kai_iwi_60_#5E_Col_1_b	1	4	NA	NA	NA	NA	182	230	NA	NA	NA	NA	NA	NA	26.02.2019	EDM
Lower Kai-iwi Shellbed	600	60	5	EXT	Lower_Kai_iwi_60_#5E_Col_1_b	1	1	NA	NA	NA	NA	205	244	NA	NA	NA	NA	NA	NA	26.02.2019	EDM
Lower Kai-iwi Shellbed	601	60	5	EXT	Lower_Kai_iwi_60_#5E_Col_1_b	1	3	NA	NA	NA	NA	164	246	NA	NA	NA	NA	NA	NA	26.02.2019	EDM
Lower Kai-iwi Shellbed	602	60	7	EXT	Lower_Kai_iwi_60_#7E_Col_1_a	1	36	488	271	NA	NA	NA	NA	NA	NA	NA	NA	NA	NA	26.02.2019	EDM
Lower Kai-iwi Shellbed	603	60	7	EXT	Lower_Kai_iwi_60_#7E_Col_1_a	1	37	497	263	NA	NA	NA	NA	NA	NA	NA	NA	NA	NA	26.02.2019	EDM
Lower Kai-iwi Shellbed	604	60	7	EXT	Lower_Kai_iwi_60_#7E_Col_1_a	1	19	473	246	NA	NA	NA	NA	NA	NA	NA	NA	NA	NA	26.02.2019	EDM
Lower Kai-iwi Shellbed	605	60	7	EXT	Lower_Kai_iwi_60_#7E_Col_1_a	1	20	486	272	NA	NA	NA	NA	NA	NA	NA	NA	NA	NA	26.02.2019	EDM
Lower Kai-iwi Shellbed	606	60	7	EXT	Lower_Kai_iwi_60_#7E_Col_1_a	1	18	509	258	NA	NA	NA	NA	NA	NA	NA	NA	NA	NA	26.02.2019	EDM
Lower Kai-iwi Shellbed	607	60	7	EXT	Lower_Kai_iwi_60_#7E_Col_1_a	1	23	492	242	NA	NA	NA	NA	NA	NA	NA	NA	NA	NA	26.02.2019	EDM
Lower Kai-iwi Shellbed	608	60	7	EXT	Lower_Kai_iwi_60_#7E_Col_1_a	1	25	512	208	NA	NA	NA	NA	NA	NA	NA	NA	NA	NA	26.02.2019	EDM
Lower Kai-iwi Shellbed	609	60	7	EXT	Lower_Kai_iwi_60_#7E_Col_1_a	1	33	421	227	NA	NA	NA	NA	NA	NA	NA	NA	NA	NA	26.02.2019	EDM
Lower Kai-iwi Shellbed	610	60	7	EXT	Lower_Kai_iwi_60_#7E_Col_1_a	1	34	449	220	NA	NA	NA	NA	NA	NA	NA	NA	NA	NA	26.02.2019	EDM
Lower Kai-iwi Shellbed	611	60	7	EXT	Lower_Kai_iwi_60_#7E_Col_1_a	1	28	461	270	NA	NA	NA	NA	NA	NA	NA	NA	NA	NA	26.02.2019	EDM
Lower Kai-iwi Shellbed	612	60	7	EXT	Lower_Kai_iwi_60_#7E_Col_2_a	2	25	499	274	NA	NA	NA	NA	NA	NA	NA	NA	NA	NA	26.02.2019	EDM
Lower Kai-iwi Shellbed	613	60	7	EXT	Lower_Kai_iwi_60_#7E_Col_2_a	2	14	472	274	NA	NA	NA	NA	NA	NA	NA	NA	NA	NA	26.02.2019	EDM
Lower Kai-iwi Shellbed	614	60	7	EXT	Lower_Kai_iwi_60_#7E_Col_2_a	2	29	437	271	NA	NA	NA	NA	NA	NA	NA	NA	NA	NA	26.02.2019	EDM
Lower Kai-iwi Shellbed	615	60	7	EXT	Lower_Kai_iwi_60_#7E_Col_2_a	2	28	528	263	NA	NA	NA	NA	NA	NA	NA	NA	NA	NA	26.02.2019	EDM
Lower Kai-iwi Shellbed	616	60	7	EXT	Lower_Kai_iwi_60_#7E_Col_2_a	2	25	501	282	NA	NA	NA	NA	NA	NA	NA	NA	NA	NA	26.02.2019	EDM
Lower Kai-iwi Shellbed	617	60	7	EXT	Lower_Kai_iwi_60_#7E_Col_2_a	2	19	488	243	NA	NA	NA	NA	NA	NA	NA	NA	NA	NA	26.02.2019	EDM
Lower Kai-iwi Shellbed	618	60	7	EXT	Lower_Kai_iwi_60_#7E_Col_2_a	2	26	430	243	NA	NA	NA	NA	NA	NA	NA	NA	NA	NA	26.02.2019	EDM
Lower Kai-iwi Shellbed	619	60	7	EXT	Lower_Kai_iwi_60_#7E_Col_2_a	2	21	435	218	NA	NA	NA	NA	NA	NA	NA	NA	NA	NA	26.02.2019	EDM
Lower Kai-iwi Shellbed	620	61	19	EXT	Lower_Kai_iwi_61_#19E_Col_1_a	1	1	NA	NA	NA	NA	169	251	NA	NA	NA	NA	NA	NA	26.02.2019	EDM
Lower Kai-iwi Shellbed	621	61	23	EXT	Lower_Kai_iwi_61_#23E_Col_1_a	1	3	NA	NA	NA	NA	229	254	NA	NA	NA	NA	NA	NA	26.02.2019	EDM
Lower Kai-iwi Shellbed	622	61	23	EXT	Lower_Kai_iwi_61_#23E_Col_1_a	1	19	583	198	NA	NA	NA	NA	NA	NA	NA	NA	NA	NA	26.02.2019	EDM
Lower Kai-iwi Shellbed	623	61	23	EXT	Lower_Kai_iwi_61_#23E_Col_1_a	1	22	520	241	NA	NA	NA	NA	NA	NA	NA	NA	NA	NA	26.02.2019	EDM
Lower Kai-iwi Shellbed	624	61	23	EXT	Lower_Kai_iwi_61_#23E_Col_1_a	1	21	492	221	NA	NA	NA	NA	NA	NA	NA	NA	NA	NA	26.02.2019	EDM
Lower Kai-iwi Shellbed	625	61	23	EXT	Lower_Kai_iwi_61_#23E_Col_1_a	1	33	494	239	NA	NA	NA	NA	NA	NA	NA	NA	NA	NA	26.02.2019	EDM
Lower Kai-iwi Shellbed	626	61	23	EXT	Lower_Kai_iwi_61_#23E_Col_1_a	1	34	453	264	NA	NA	NA	NA	NA	NA	NA	NA	NA	NA	26.02.2019	EDM
Lower Kai-iwi Shellbed	627	61	23	EXT	Lower_Kai_iwi_61_#23E_Col_1_a	1	29	435	216	NA	NA	NA	NA	NA	NA	NA	NA	NA	NA	26.02.2019	EDM
Lower Kai-iwi Shellbed	628	61	23	EXT	Lower_Kai_iwi_61_#23E_Col_1_a	1	2	NA	NA	NA	NA	176	248	NA	NA	NA	NA	NA	NA	26.02.2019	EDM
Lower Kai-iwi Shellbed	629	61	23	EXT	Lower_Kai_iwi_61_#23E_Col_1_a	1	1	NA	NA	NA	NA	177	266	NA	NA	NA	NA	NA	NA	26.02.2019	EDM
Lower Kai-iwi Shellbed	630	61	23	EXT	Lower_Kai_iwi_61_#23E_Col_1_a	1	11	NA	NA	NA	NA	NA	NA	NA	NA	358	184	NA	NA	26.02.2019	EDM
Lower Kai-iwi Shellbed	631	61	23	EXT	Lower_Kai_iwi_61_#23E_Col_1_a	1	9	NA	NA	NA	NA	NA	NA	NA	NA	296	234	NA	NA	26.02.2019	EDM
Lower Kai-iwi Shellbed	632	61	25	EXT	Lower_Kai_iwi_61_#25E_Col_2_a	2	2	NA	NA	NA	NA	168	251	NA	NA	NA	NA	NA	NA	26.02.2019	EDM
Lower Kai-iwi Shellbed	633	61	25	EXT	Lower_Kai_iwi_61_#25E_Col_2_a	2	3	NA	NA	NA	NA	152	246	51	94	NA	NA	NA	NA	26.02.2019	EDM
Lower Kai-iwi Shellbed	634	61	25	EXT	Lower_Kai_iwi_61_#25E_Col_2_a	2	25	471	224	NA	NA	NA	NA	NA	NA	NA	NA	NA	NA	26.02.2019	EDM
Lower Kai-iwi Shellbed	635	61	25	EXT	Lower_Kai_iwi_61_#25E_Col_2_a	2	22	526	221	NA	NA	NA	NA	NA	NA	NA	NA	NA	NA	26.02.2019	EDM
Lower Kai-iwi Shellbed	636	61	25	EXT	Lower_Kai_iwi_61_#25E_Col_2_a	2	20	407	204	NA	NA	NA	NA	NA	NA	NA	NA	NA	NA	26.02.2019	EDM
Lower Kai-iwi Shellbed	637	61	25	EXT	Lower_Kai_iwi_61_#25E_Col_2_b	2	1	NA	NA	NA	NA	177	259	46	78	NA	NA	NA	NA	26.02.2019	EDM
Lower Kai-iwi Shellbed	638	61	25	EXT	Lower_Kai_iwi_61_#25E_Col_3_a	3	2	NA	NA	NA	NA	186	223	NA	NA	NA	NA	NA	NA	26.02.2019	EDM
Lower Kai-iwi Shellbed	639	61	25	EXT	Lower_Kai_iwi_61_#25E_Col_3_a	3	3	NA	NA	NA	NA	184	237	NA	NA	NA	NA	NA	NA	26.02.2019	EDM
Lower Kai-iwi Shellbed	640	61	25	EXT	Lower_Kai_iwi_61_#25E_Col_3_a	3	1	NA	NA	NA	NA	194	226	NA	NA	NA	NA	NA	NA	26.02.2019	EDM
Lower Kai-iwi Shellbed	641	61	25	EXT	Lower_Kai_iwi_61_#25E_Col_4_a	4	1	NA	NA	NA	NA	178	229	NA	NA	NA	NA	NA	NA	26.02.2019	EDM
Upper Kai-iwi Shellbed	642	9.43	44	EXT	Upper_Kai_iwi_9.43_#44E_Col_8_a2	8	1	NA	NA	NA	NA	184	246	48	78	NA	NA	NA	NA	26.02.2019	EDM
Upper Kai-iwi Shellbed	643	9.43	43	INT	Upper_Kai_iwi_9.43_#43I_Col_4_c	4	1	NA	NA	NA	NA	186	247	NA	NA	NA	NA	NA	NA	26.02.2019	EDM
Upper Kai-iwi Shellbed	644	9.43	43	INT	Upper_Kai_iwi_9.43_#43I_Col_4_c	4	4	NA	NA	NA	NA	NA	NA	NA	NA	316	127	35	24	26.02.2019	EDM
Upper Kai-iwi Shellbed	645	9.43	43	INT	Upper_Kai_iwi_9.43_#43I_Col_4_c	4	19	333	169	NA	NA	NA	NA	NA	NA	NA	NA	NA	NA	26.02.2019	EDM
Upper Kai-iwi Shellbed	646	9.43	43	INT	Upper_Kai_iwi_9.43_#43I_Col_4_c	4	18	381	205	NA	NA	NA	NA	NA	NA	NA	NA	NA	NA	26.02.2019	EDM
Upper Kai-iwi Shellbed	647	9.43	43	INT	Upper_Kai_iwi_9.43_#43I_Col_4_c	4	17	547	208	NA	NA	NA	NA	NA	NA	NA	NA	NA	NA	26.02.2019	EDM
Upper Kai-iwi Shellbed	648	9.43	43	INT	Upper_Kai_iwi_9.43_#43I_Col_4_c	4	11	450	189	NA	NA	NA	NA	NA	NA	NA	NA	NA	NA	26.02.2019	EDM
Upper Kai-iwi Shellbed	649	9.43	43	INT	Upper_Kai_iwi_9.43_#43I_Col_4_c	4	14	399	188	NA	NA	NA	NA	NA	NA	NA	NA	NA	NA	26.02.2019	EDM
Upper Kai-iwi Shellbed	650	9.43	43	INT	Upper_Kai_iwi_9.43_#43I_Col_4_c	4	15	500	189	NA	NA	NA	NA	NA	NA	NA	NA	NA	NA	26.02.2019	EDM
Upper Kai-iwi Shellbed	651	9.43	43	INT	Upper_Kai_iwi_9.43_#43I_Col_4_c	4	16	421	209	NA	NA	NA	NA	NA	NA	NA	NA	NA	NA	26.02.2019	EDM
Upper Kai-iwi Shellbed	652	9.43	43	INT	Upper_Kai_iwi_9.43_#43I_Col_4_b	4	2	NA	NA	NA	NA	153	236	52	77	NA	NA	NA	NA	26.02.2019	EDM
Upper Kai-iwi Shellbed	653	9.43	43	INT	Upper_Kai_iwi_9.43_#43I_Col_4_b	4	1	NA	NA	NA	NA	185	249	52	78	NA	NA	NA	NA	26.02.2019	EDM
Upper Kai-iwi Shellbed	654	9.43	43	INT	Upper_Kai_iwi_9.43_#43I_Col_4_b	4	3	NA	NA	NA	NA	168	238	49	81	NA	NA	NA	NA	26.02.2019	EDM
Upper Kai-iwi Shellbed	655	9.43	43	INT	Upper_Kai_iwi_9.43_#43I_Col_4_b	4	25	531	184	NA	NA	NA	NA	NA	NA	NA	NA	NA	NA	26.02.2019	EDM
Upper Kai-iwi Shellbed	656	9.43	43	INT	Upper_Kai_iwi_9.43_#43I_Col_4_b	4	26	519	172	NA	NA	NA	NA	NA	NA	NA	NA	NA	NA	26.02.2019	EDM
Upper Kai-iwi Shellbed	657	9.43	43	INT	Upper_Kai_iwi_9.43_#43I_Col_4_b	4	23	512	171	NA	NA	NA	NA	NA	NA	NA	NA	NA	NA	26.02.2019	EDM
Upper Kai-iwi Shellbed	658	9.43	43	INT	Upper_Kai_iwi_9.43_#43I_Col_4_b	4	15	461	195	NA	NA	NA	NA	NA	NA	NA	NA	NA	NA	26.02.2019	EDM
Upper Kai-iwi Shellbed	659	9.43	43	INT	Upper_Kai_iwi_9.43_#43I_Col_4_a	4	10	NA	NA	NA	NA	167	221	48	73	NA	NA	NA	NA	26.02.2019	EDM
Upper Kai-iwi Shellbed	660	9.43	43	INT	Upper_Kai_iwi_9.43_#43I_Col_4_a	4	6	NA	NA	NA	NA	164	245	47	79	NA	NA	NA	NA	26.02.2019	EDM
Upper Kai-iwi Shellbed	661	9.43	43	INT	Upper_Kai_iwi_9.43_#43I_Col_4_a	4	1	NA	NA	NA	NA	166	197	50	82	NA	NA	NA	NA	26.02.2019	EDM
Upper Kai-iwi Shellbed	662	9.43	43	INT	Upper_Kai_iwi_9.43_#43I_Col_4_a	4	2	NA	NA	NA	NA	171	229	47	85	NA	NA	NA	NA	26.02.2019	EDM
Upper Kai-iwi Shellbed	663	9.43	43	INT	Upper_Kai_iwi_9.43_#43I_Col_4_a	4	3	NA	NA	NA	NA	179	228	47	81	NA	NA	NA	NA	26.02.2019	EDM
Upper Kai-iwi Shellbed	664	9.43	43	INT	Upper_Kai_iwi_9.43_#43I_Col_4_a	4	4	NA	NA	NA	NA	175	214	59	94	NA	NA	NA	NA	26.02.2019	EDM
Upper Kai-iwi Shellbed	665	9.43	43	INT	Upper_Kai_iwi_9.43_#43I_Col_4_a	4	14	NA	NA	NA	NA	162	229	53	77	NA	NA	NA	NA	26.02.2019	EDM
Upper Kai-iwi Shellbed	666	9.43	43	INT	Upper_Kai_iwi_9.43_#43I_Col_4_a	4	11	NA	NA	NA	NA	160	244	51	90	NA	NA	NA	NA	26.02.2019	EDM
Upper Kai-iwi Shellbed	667	9.43	43	INT	Upper_Kai_iwi_9.43_#43I_Col_4_a	4	9	NA	NA	NA	NA	153	254	51	88	NA	NA	NA	NA	26.02.2019	EDM
Upper Kai-iwi Shellbed	668	9.43	43	INT	Upper_Kai_iwi_9.43_#43I_Col_4_a	4	16	NA	NA	NA	NA	179	219	NA	NA	NA	NA	NA	NA	26.02.2019	EDM
Upper Kai-iwi Shellbed	669	9.43	43	INT	Upper_Kai_iwi_9.43_#43I_Col_4_a	4	5	NA	NA	NA	NA	171	229	55	80	NA	NA	NA	NA	26.02.2019	EDM
Upper Kai-iwi Shellbed	670	9.43	43	INT	Upper_Kai_iwi_9.43_#43I_Col_4_a	4	13	NA	NA	NA	NA	149	272	51	86	NA	NA	NA	NA	26.02.2019	EDM
Upper Kai-iwi Shellbed	671	9.43	43	INT	Upper_Kai_iwi_9.43_#43I_Col_4_a	4	12	NA	NA	NA	NA	150	228	NA	NA	NA	NA	NA	NA	26.02.2019	EDM
Upper Kai-iwi Shellbed	672	9.43	43	INT	Upper_Kai_iwi_9.43_#43I_Col_4_a	4	45	442	202	NA	NA	NA	NA	NA	NA	NA	NA	NA	NA	26.02.2019	EDM
Upper Kai-iwi Shellbed	673	9.43	43	INT	Upper_Kai_iwi_9.43_#43I_Col_4_a	4	46	429	186	65	69	NA	NA	NA	NA	NA	NA	NA	NA	26.02.2019	EDM
Upper Kai-iwi Shellbed	674	9.43	43	INT	Upper_Kai_iwi_9.43_#43I_Col_4_a	4	42	484	177	69	64	NA	NA	NA	NA	NA	NA	NA	NA	26.02.2019	EDM
Upper Kai-iwi Shellbed	675	9.43	43	INT	Upper_Kai_iwi_9.43_#43I_Col_4_a	4	54	361	228	NA	NA	NA	NA	NA	NA	NA	NA	NA	NA	26.02.2019	EDM
Upper Kai-iwi Shellbed	676	9.43	43	INT	Upper_Kai_iwi_9.43_#43I_Col_4_a	4	7	NA	NA	NA	NA	156	224	51	75	NA	NA	NA	NA	26.02.2019	EDM
Upper Kai-iwi Shellbed	677	9.43	43	INT	Upper_Kai_iwi_9.43_#43I_Col_4_a	4	44	385	192	NA	NA	NA	NA	NA	NA	NA	NA	NA	NA	26.02.2019	EDM
Upper Kai-iwi Shellbed	678	9.43	43	INT	Upper_Kai_iwi_9.43_#43I_Col_4_a	4	43	525	196	NA	NA	NA	NA	NA	NA	NA	NA	NA	NA	26.02.2019	EDM
Upper Kai-iwi Shellbed	679	9.43	43	INT	Upper_Kai_iwi_9.43_#43I_Col_3_a	3	2	NA	NA	NA	NA	171	198	NA	NA	NA	NA	NA	NA	27.02.2019	EDM
Upper Kai-iwi Shellbed	680	9.43	43	INT	Upper_Kai_iwi_9.43_#43I_Col_3_a	3	3	NA	NA	NA	NA	194	267	46	85	NA	NA	NA	NA	27.02.2019	EDM
Upper Kai-iwi Shellbed	681	9.43	43	INT	Upper_Kai_iwi_9.43_#43I_Col_3_a	3	1	NA	NA	NA	NA	174	226	NA	NA	NA	NA	NA	NA	27.02.2019	EDM
Upper Kai-iwi Shellbed	682	9.43	43	INT	Upper_Kai_iwi_9.43_#43I_Col_3_a	3	9	NA	NA	NA	NA	164	222	45	81	NA	NA	NA	NA	27.02.2019	EDM
Upper Kai-iwi Shellbed	683	9.43	43	INT	Upper_Kai_iwi_9.43_#43I_Col_3_a	3	10	NA	NA	NA	NA	173	237	NA	NA	NA	NA	NA	NA	27.02.2019	EDM
Upper Kai-iwi Shellbed	684	9.43	43	INT	Upper_Kai_iwi_9.43_#43I_Col_3_a	3	8	NA	NA	NA	NA	161	227	NA	NA	NA	NA	NA	NA	27.02.2019	EDM
Upper Kai-iwi Shellbed	685	9.43	43	INT	Upper_Kai_iwi_9.43_#43I_Col_3_a	3	7	NA	NA	NA	NA	150	240	52	83	NA	NA	NA	NA	27.02.2019	EDM
Upper Kai-iwi Shellbed	686	9.43	43	INT	Upper_Kai_iwi_9.43_#43I_Col_3_a	3	29	477	240	NA	NA	NA	NA	NA	NA	NA	NA	NA	NA	27.02.2019	EDM
Upper Kai-iwi Shellbed	687	9.43	43	INT	Upper_Kai_iwi_9.43_#43I_Col_3_a	3	25	397	174	NA	NA	NA	NA	NA	NA	NA	NA	NA	NA	27.02.2019	EDM
Upper Kai-iwi Shellbed	688	9.43	43	INT	Upper_Kai_iwi_9.43_#43I_Col_3_a	3	44	520	219	NA	NA	NA	NA	NA	NA	NA	NA	NA	NA	27.02.2019	EDM
Upper Kai-iwi Shellbed	689	9.43	43	INT	Upper_Kai_iwi_9.43_#43I_Col_3_a	3	24	375	192	NA	NA	NA	NA	NA	NA	NA	NA	NA	NA	27.02.2019	EDM
Upper Kai-iwi Shellbed	690	9.43	43	INT	Upper_Kai_iwi_9.43_#43I_Col_3_a	3	23	373	202	NA	NA	NA	NA	NA	NA	NA	NA	NA	NA	27.02.2019	EDM
Upper Kai-iwi Shellbed	691	9.43	43	INT	Upper_Kai_iwi_9.43_#43I_Col_3_a	3	51	401	233	NA	NA	NA	NA	NA	NA	NA	NA	NA	NA	27.02.2019	EDM
Upper Kai-iwi Shellbed	692	9.43	43	INT	Upper_Kai_iwi_9.43_#43I_Col_3_a	3	38	374	206	NA	NA	NA	NA	NA	NA	NA	NA	NA	NA	27.02.2019	EDM
Upper Kai-iwi Shellbed	693	9.43	43	INT	Upper_Kai_iwi_9.43_#43I_Col_3_a	3	32	485	198	NA	NA	NA	NA	NA	NA	NA	NA	NA	NA	27.02.2019	EDM
Upper Kai-iwi Shellbed	694	9.43	43	INT	Upper_Kai_iwi_9.43_#43I_Col_3_a	3	31	409	189	NA	NA	NA	NA	NA	NA	NA	NA	NA	NA	27.02.2019	EDM
Upper Kai-iwi Shellbed	695	9.43	43	INT	Upper_Kai_iwi_9.43_#43I_Col_3_a	3	41	423	231	NA	NA	NA	NA	NA	NA	NA	NA	NA	NA	27.02.2019	EDM
Upper Kai-iwi Shellbed	696	9.43	43	INT	Upper_Kai_iwi_9.43_#43I_Col_3_a	3	45	439	218	NA	NA	NA	NA	NA	NA	NA	NA	NA	NA	27.02.2019	EDM
Upper Kai-iwi Shellbed	697	9.43	21	EXT	Upper_Kai_iwi_9.43_#21E_Col_6_a	6	1	NA	NA	NA	NA	161	231	NA	NA	NA	NA	NA	NA	27.02.2019	EDM
Upper Kai-iwi Shellbed	698	9.43	21	EXT	Upper_Kai_iwi_9.43_#21E_Col_6_a	6	2	NA	NA	NA	NA	160	199	NA	NA	NA	NA	NA	NA	27.02.2019	EDM
Upper Kai-iwi Shellbed	699	9.43	21	EXT	Upper_Kai_iwi_9.43_#21E_Col_6_a	6	7	NA	NA	70	68	NA	NA	NA	NA	NA	NA	NA	NA	27.02.2019	EDM
Upper Kai-iwi Shellbed	700	9.43	21	EXT	Upper_Kai_iwi_9.43_#21E_Col_5_a	5	8	NA	NA	NA	NA	173	228	NA	NA	NA	NA	NA	NA	27.02.2019	EDM
Upper Kai-iwi Shellbed	701	9.43	21	EXT	Upper_Kai_iwi_9.43_#21E_Col_5_a	5	35	NA	NA	71	65	NA	NA	NA	NA	NA	NA	NA	NA	27.02.2019	EDM
Upper Kai-iwi Shellbed	702	9.43	21	EXT	Upper_Kai_iwi_9.43_#21E_Col_5_a	5	4	NA	NA	NA	NA	167	220	44	79	NA	NA	NA	NA	27.02.2019	EDM
Upper Kai-iwi Shellbed	703	9.43	21	EXT	Upper_Kai_iwi_9.43_#21E_Col_5_a	5	24	NA	NA	68	65	NA	NA	NA	NA	NA	NA	NA	NA	27.02.2019	EDM
Upper Kai-iwi Shellbed	704	9.43	21	EXT	Upper_Kai_iwi_9.43_#21E_Col_5_a	5	31	524	220	NA	NA	NA	NA	NA	NA	NA	NA	NA	NA	27.02.2019	EDM
Upper Kai-iwi Shellbed	705	9.43	21	EXT	Upper_Kai_iwi_9.43_#21E_Col_5_a	5	33	487	218	NA	NA	NA	NA	NA	NA	NA	NA	NA	NA	27.02.2019	EDM
Upper Kai-iwi Shellbed	706	9.43	21	EXT	Upper_Kai_iwi_9.43_#21E_Col_5_a	5	30	476	218	NA	NA	NA	NA	NA	NA	NA	NA	NA	NA	27.02.2019	EDM
Upper Kai-iwi Shellbed	707	9.43	21	EXT	Upper_Kai_iwi_9.43_#21E_Col_5_a	5	28	495	186	NA	NA	NA	NA	NA	NA	NA	NA	NA	NA	27.02.2019	EDM
Upper Kai-iwi Shellbed	708	9.43	21	EXT	Upper_Kai_iwi_9.43_#21E_Col_1_b	1	6	NA	NA	NA	NA	190	270	48	91	NA	NA	NA	NA	27.02.2019	EDM
Upper Kai-iwi Shellbed	709	9.43	21	EXT	Upper_Kai_iwi_9.43_#21E_Col_1_b	1	5	NA	NA	NA	NA	176	219	41	86	NA	NA	NA	NA	27.02.2019	EDM
Upper Kai-iwi Shellbed	710	9.43	21	EXT	Upper_Kai_iwi_9.43_#21E_Col_1_b	1	4	NA	NA	NA	NA	167	221	45	77	NA	NA	NA	NA	27.02.2019	EDM
Upper Kai-iwi Shellbed	711	9.43	21	EXT	Upper_Kai_iwi_9.43_#21E_Col_1_b	1	3	NA	NA	NA	NA	171	245	48	72	NA	NA	NA	NA	27.02.2019	EDM
Upper Kai-iwi Shellbed	712	9.43	21	EXT	Upper_Kai_iwi_9.43_#21E_Col_1_b	1	1	NA	NA	NA	NA	188	221	NA	NA	NA	NA	NA	NA	27.02.2019	EDM
Upper Kai-iwi Shellbed	713	9.43	21	EXT	Upper_Kai_iwi_9.43_#21E_Col_1_a	1	2	NA	NA	NA	NA	176	202	NA	NA	NA	NA	NA	NA	27.02.2019	EDM
Upper Kai-iwi Shellbed	714	9.43	21	EXT	Upper_Kai_iwi_9.43_#21E_Col_1_a	1	1	NA	NA	NA	NA	186	239	NA	NA	NA	NA	NA	NA	27.02.2019	EDM
Upper Kai-iwi Shellbed	715	9.43	21	EXT	Upper_Kai_iwi_9.43_#21E_Col_1_a	1	4	NA	NA	NA	NA	186	219	NA	NA	NA	NA	NA	NA	27.02.2019	EDM
Upper Kai-iwi Shellbed	716	9.43	2	INT	Upper_Kai_iwi_9.43_#2I_Col_14_a	14	1	NA	NA	NA	NA	173	254	NA	NA	NA	NA	NA	NA	27.02.2019	EDM
Upper Kai-iwi Shellbed	717	9.43	2	INT	Upper_Kai_iwi_9.43_#2I_Col_14_a	14	2	NA	NA	NA	NA	162	234	NA	NA	NA	NA	NA	NA	27.02.2019	EDM
Upper Kai-iwi Shellbed	718	9.43	2	EXT	Upper_Kai_iwi_9.43_#2E_Col_13_a	13	2	NA	NA	NA	NA	170	213	47	73	NA	NA	NA	NA	27.02.2019	EDM
Upper Kai-iwi Shellbed	719	9.43	2	EXT	Upper_Kai_iwi_9.43_#2E_Col_13_a	13	1	NA	NA	NA	NA	171	209	48	76	NA	NA	NA	NA	27.02.2019	EDM
Upper Kai-iwi Shellbed	720	9.43	2	EXT	Upper_Kai_iwi_9.43_#2E_Col_13_a	13	3	NA	NA	NA	NA	138	228	NA	NA	NA	NA	NA	NA	27.02.2019	EDM
Upper Kai-iwi Shellbed	721	9.43	2	EXT	Upper_Kai_iwi_9.43_#2E_Col_13_a	13	4	NA	NA	NA	NA	176	203	40	75	NA	NA	NA	NA	27.02.2019	EDM
Upper Kai-iwi Shellbed	722	9.43	2	EXT	Upper_Kai_iwi_9.43_#2E_Col_13_a	13	5	NA	NA	NA	NA	160	202	NA	NA	NA	NA	NA	NA	27.02.2019	EDM
Upper Kai-iwi Shellbed	723	9.43	2	EXT	Upper_Kai_iwi_9.43_#2E_Col_13_a	13	6	NA	NA	NA	NA	165	214	46	75	NA	NA	NA	NA	27.02.2019	EDM
Upper Kai-iwi Shellbed	724	9.43	2	EXT	Upper_Kai_iwi_9.43_#2E_Col_13_a	13	29	411	199	NA	NA	NA	NA	NA	NA	NA	NA	NA	NA	27.02.2019	EDM
Upper Kai-iwi Shellbed	725	9.43	2	EXT	Upper_Kai_iwi_9.43_#2E_Col_13_a	13	27	466	232	NA	NA	NA	NA	NA	NA	NA	NA	NA	NA	27.02.2019	EDM
Upper Kai-iwi Shellbed	726	9.43	2	EXT	Upper_Kai_iwi_9.43_#2E_Col_13_a	13	28	382	184	NA	NA	NA	NA	NA	NA	NA	NA	NA	NA	27.02.2019	EDM
Upper Kai-iwi Shellbed	727	9.43	2	EXT	Upper_Kai_iwi_9.43_#2E_Col_13_a	13	47	378	204	NA	NA	NA	NA	NA	NA	NA	NA	NA	NA	27.02.2019	EDM
Upper Kai-iwi Shellbed	728	9.43	2	EXT	Upper_Kai_iwi_9.43_#2E_Col_13_a	13	54	484	202	NA	NA	NA	NA	NA	NA	NA	NA	NA	NA	27.02.2019	EDM
Upper Kai-iwi Shellbed	729	9.42	25	EXT	Upper_Kai_iwi_9.42_#25E_Col_2_a	2	1	NA	NA	NA	NA	167	221	45	86	NA	NA	NA	NA	27.02.2019	EDM
Upper Kai-iwi Shellbed	730	9.42	25	EXT	Upper_Kai_iwi_9.42_#25E_Col_2_a	2	23	403	229	NA	NA	NA	NA	NA	NA	NA	NA	NA	NA	27.02.2019	EDM
Upper Kai-iwi Shellbed	731	9.42	25	EXT	Upper_Kai_iwi_9.42_#25E_Col_2_a	2	26	384	212	NA	NA	NA	NA	NA	NA	NA	NA	NA	NA	27.02.2019	EDM
Upper Kai-iwi Shellbed	732	9.42	25	EXT	Upper_Kai_iwi_9.42_#25E_Col_2_a	2	24	404	208	NA	NA	NA	NA	NA	NA	NA	NA	NA	NA	27.02.2019	EDM
Upper Kai-iwi Shellbed	733	9.42	25	EXT	Upper_Kai_iwi_9.42_#25E_Col_2_a	2	2	NA	NA	NA	NA	158	239	NA	NA	NA	NA	NA	NA	27.02.2019	EDM
Upper Kai-iwi Shellbed	734	9.42	25	EXT	Upper_Kai_iwi_9.42_#25E_Col_2_a	2	3	NA	NA	NA	NA	189	250	NA	NA	NA	NA	NA	NA	27.02.2019	EDM
Upper Kai-iwi Shellbed	735	9.42	25	EXT	Upper_Kai_iwi_9.42_#25E_Col_2_a	2	28	393	215	NA	NA	NA	NA	NA	NA	NA	NA	NA	NA	27.02.2019	EDM
Upper Kai-iwi Shellbed	736	9.42	22	EXT	Upper_Kai_iwi_9.42_#22E_Col_11_a	11	11	416	210	NA	NA	NA	NA	NA	NA	NA	NA	NA	NA	27.02.2019	EDM
Upper Kai-iwi Shellbed	737	9.42	22	EXT	Upper_Kai_iwi_9.42_#22E_Col_11_a	11	4	435	209	NA	NA	NA	NA	NA	NA	NA	NA	NA	NA	27.02.2019	EDM
Upper Kai-iwi Shellbed	738	9.42	22	EXT	Upper_Kai_iwi_9.42_#22E_Col_11_a	11	10	420	236	NA	NA	NA	NA	NA	NA	NA	NA	NA	NA	27.02.2019	EDM
Upper Kai-iwi Shellbed	739	9.42	22	EXT	Upper_Kai_iwi_9.42_#22E_Col_11_a	11	14	388	209	NA	NA	NA	NA	NA	NA	NA	NA	NA	NA	27.02.2019	EDM
Upper Kai-iwi Shellbed	740	9.42	22	EXT	Upper_Kai_iwi_9.42_#22E_Col_11_a	11	7	559	212	NA	NA	NA	NA	NA	NA	NA	NA	NA	NA	27.02.2019	EDM
Upper Kai-iwi Shellbed	741	9.42	22	EXT	Upper_Kai_iwi_9.42_#22E_Col_11_a	11	17	456	214	NA	NA	NA	NA	NA	NA	NA	NA	NA	NA	27.02.2019	EDM
Upper Kai-iwi Shellbed	742	9.42	22	EXT	Upper_Kai_iwi_9.42_#22E_Col_1_b	1	2	NA	NA	NA	NA	188	216	NA	NA	NA	NA	NA	NA	27.02.2019	EDM
Upper Kai-iwi Shellbed	743	9.42	22	EXT	Upper_Kai_iwi_9.42_#22E_Col_1_b	1	1	NA	NA	NA	NA	187	256	NA	NA	NA	NA	NA	NA	27.02.2019	EDM
Upper Kai-iwi Shellbed	744	9.42	22	EXT	Upper_Kai_iwi_9.42_#22E_Col_1_b	1	3	NA	NA	NA	NA	193	206	NA	NA	NA	NA	NA	NA	27.02.2019	EDM
Upper Kai-iwi Shellbed	745	9.42	22	EXT	Upper_Kai_iwi_9.42_#22E_Col_1_b	1	5	NA	NA	NA	NA	195	240	NA	NA	NA	NA	NA	NA	27.02.2019	EDM
Upper Kai-iwi Shellbed	746	9.42	22	EXT	Upper_Kai_iwi_9.42_#22E_Col_1_b	1	7	NA	NA	NA	NA	164	246	NA	NA	NA	NA	NA	NA	27.02.2019	EDM
Upper Kai-iwi Shellbed	747	9.42	22	EXT	Upper_Kai_iwi_9.42_#22E_Col_1_a	1	6	NA	NA	NA	NA	174	246	45	88	NA	NA	NA	NA	27.02.2019	EDM
Upper Kai-iwi Shellbed	748	9.42	22	EXT	Upper_Kai_iwi_9.42_#22E_Col_1_a	1	2	NA	NA	NA	NA	177	256	49	92	NA	NA	NA	NA	27.02.2019	EDM
Upper Kai-iwi Shellbed	749	9.42	22	EXT	Upper_Kai_iwi_9.42_#22E_Col_1_a	1	1	NA	NA	NA	NA	170	251	NA	NA	NA	NA	NA	NA	27.02.2019	EDM
Upper Kai-iwi Shellbed	750	9.42	22	EXT	Upper_Kai_iwi_9.42_#22E_Col_1_a	1	3	NA	NA	NA	NA	213	265	NA	NA	NA	NA	NA	NA	27.02.2019	EDM
Upper Kai-iwi Shellbed	751	9.42	22	EXT	Upper_Kai_iwi_9.42_#22E_Col_1_a	1	4	NA	NA	NA	NA	195	257	NA	NA	NA	NA	NA	NA	27.02.2019	EDM
Upper Kai-iwi Shellbed	752	9.42	22	EXT	Upper_Kai_iwi_9.42_#22E_Col_1_a	1	5	NA	NA	NA	NA	174	256	NA	NA	NA	NA	NA	NA	27.02.2019	EDM
Upper Kai-iwi Shellbed	753	9.42	21	EXT	Upper_Kai_iwi_9.42_#21E_Col_1_a	1	2	NA	NA	NA	NA	196	224	42	89	NA	NA	NA	NA	27.02.2019	EDM
Upper Kai-iwi Shellbed	754	9.42	21	EXT	Upper_Kai_iwi_9.42_#21E_Col_1_a	1	3	NA	NA	NA	NA	201	215	49	87	NA	NA	NA	NA	27.02.2019	EDM
Upper Kai-iwi Shellbed	755	9.42	21	EXT	Upper_Kai_iwi_9.42_#21E_Col_1_a	1	4	NA	NA	NA	NA	210	214	NA	NA	NA	NA	NA	NA	27.02.2019	EDM
Upper Kai-iwi Shellbed	756	9.42	21	EXT	Upper_Kai_iwi_9.42_#21E_Col_1_a	1	11	421	151	NA	NA	NA	NA	NA	NA	NA	NA	NA	NA	27.02.2019	EDM
Upper Kai-iwi Shellbed	757	9.42	21	EXT	Upper_Kai_iwi_9.42_#21E_Col_1_a	1	9	397	186	NA	NA	NA	NA	NA	NA	NA	NA	NA	NA	27.02.2019	EDM
Upper Kai-iwi Shellbed	758	9.42	21	EXT	Upper_Kai_iwi_9.42_#21E_Col_1_a	1	24	500	149	NA	NA	NA	NA	NA	NA	NA	NA	NA	NA	27.02.2019	EDM
Upper Kai-iwi Shellbed	759	9.42	21	EXT	Upper_Kai_iwi_9.42_#21E_Col_1_a	1	19	355	193	NA	NA	NA	NA	NA	NA	NA	NA	NA	NA	27.02.2019	EDM
Upper Kai-iwi Shellbed	760	9.42	21	EXT	Upper_Kai_iwi_9.42_#21E_Col_1_a	1	12	422	185	NA	NA	NA	NA	NA	NA	NA	NA	NA	NA	27.02.2019	EDM
Upper Kai-iwi Shellbed	761	9.42	21	EXT	Upper_Kai_iwi_9.42_#21E_Col_1_a	1	15	474	174	NA	NA	NA	NA	NA	NA	NA	NA	NA	NA	27.02.2019	EDM
Upper Kai-iwi Shellbed	762	9.42	21	EXT	Upper_Kai_iwi_9.42_#21E_Col_1_a	1	7	460	203	NA	NA	NA	NA	NA	NA	NA	NA	NA	NA	27.02.2019	EDM
Upper Kai-iwi Shellbed	763	9.42	11	EXT	Upper_Kai_iwi_9.42_#11E_Col_8_a	8	2	NA	NA	NA	NA	179	237	NA	NA	NA	NA	NA	NA	27.02.2019	EDM
Upper Kai-iwi Shellbed	764	9.42	11	EXT	Upper_Kai_iwi_9.42_#11E_Col_8_a	8	1	NA	NA	NA	NA	195	243	NA	NA	NA	NA	NA	NA	27.02.2019	EDM
Upper Kai-iwi Shellbed	765	9.42	11	EXT	Upper_Kai_iwi_9.42_#11E_Col_8_a	8	11	452	204	NA	NA	NA	NA	NA	NA	NA	NA	NA	NA	27.02.2019	EDM
Upper Kai-iwi Shellbed	766	9.42	11	EXT	Upper_Kai_iwi_9.42_#11E_Col_8_a	8	13	364	183	NA	NA	NA	NA	NA	NA	NA	NA	NA	NA	27.02.2019	EDM
Upper Kai-iwi Shellbed	767	9.42	11	EXT	Upper_Kai_iwi_9.42_#11E_Col_8_a	8	12	361	199	NA	NA	NA	NA	NA	NA	NA	NA	NA	NA	27.02.2019	EDM
Upper Kai-iwi Shellbed	768	9.42	9	EXT	Upper_Kai_iwi_9.42_#9E_Col_21_b	21	2	NA	NA	NA	NA	177	235	40	76	NA	NA	NA	NA	27.02.2019	EDM
Upper Kai-iwi Shellbed	769	9.42	9	EXT	Upper_Kai_iwi_9.42_#9E_Col_21_b	21	3	NA	NA	NA	NA	179	205	43	82	NA	NA	NA	NA	27.02.2019	EDM
Upper Kai-iwi Shellbed	770	9.42	9	EXT	Upper_Kai_iwi_9.42_#9E_Col_21_b	21	19	374	223	NA	NA	NA	NA	NA	NA	NA	NA	NA	NA	27.02.2019	EDM
Upper Kai-iwi Shellbed	771	9.42	9	EXT	Upper_Kai_iwi_9.42_#9E_Col_21_b	21	17	508	190	NA	NA	NA	NA	NA	NA	NA	NA	NA	NA	27.02.2019	EDM
Upper Kai-iwi Shellbed	772	9.42	9	EXT	Upper_Kai_iwi_9.42_#9E_Col_21_b	21	16	452	208	NA	NA	NA	NA	NA	NA	NA	NA	NA	NA	27.02.2019	EDM
Upper Kai-iwi Shellbed	773	9.42	9	EXT	Upper_Kai_iwi_9.42_#9E_Col_21_b	21	12	484	204	NA	NA	NA	NA	NA	NA	NA	NA	NA	NA	27.02.2019	EDM
Upper Kai-iwi Shellbed	774	9.42	9	EXT	Upper_Kai_iwi_9.42_#9E_Col_21_b	21	13	441	201	NA	NA	NA	NA	NA	NA	NA	NA	NA	NA	27.02.2019	EDM
Upper Kai-iwi Shellbed	775	9.42	9	EXT	Upper_Kai_iwi_9.42_#9E_Col_21_a	21	1	NA	NA	NA	NA	159	237	NA	NA	NA	NA	NA	NA	27.02.2019	EDM
Upper Kai-iwi Shellbed	776	9.42	9	EXT	Upper_Kai_iwi_9.42_#9E_Col_21_a	21	9	396	213	NA	NA	NA	NA	NA	NA	NA	NA	NA	NA	27.02.2019	EDM
Upper Kai-iwi Shellbed	777	9.42	9	EXT	Upper_Kai_iwi_9.42_#9E_Col_21_a	21	17	402	207	NA	NA	NA	NA	NA	NA	NA	NA	NA	NA	27.02.2019	EDM
Upper Kai-iwi Shellbed	778	9.42	9	EXT	Upper_Kai_iwi_9.42_#9E_Col_21_a	21	19	421	214	NA	NA	NA	NA	NA	NA	NA	NA	NA	NA	27.02.2019	EDM
Upper Kai-iwi Shellbed	779	9.42	9	EXT	Upper_Kai_iwi_9.42_#9E_Col_21_a	21	13	431	245	NA	NA	NA	NA	NA	NA	NA	NA	NA	NA	27.02.2019	EDM
Upper Kai-iwi Shellbed	780	9.42	9	EXT	Upper_Kai_iwi_9.42_#9E_Col_21_a	21	14	465	239	NA	NA	NA	NA	NA	NA	NA	NA	NA	NA	27.02.2019	EDM
Upper Kai-iwi Shellbed	781	9.40	24	EXT	Upper_Kai_iwi_9.40_#24E_Col_2_a	2	3	NA	NA	NA	NA	190	237	NA	NA	NA	NA	NA	NA	27.02.2019	EDM
Upper Kai-iwi Shellbed	782	9.40	22	EXT	Upper_Kai_iwi_9.40_#22E_Col_6_b	6	8	438	242	NA	NA	NA	NA	NA	NA	NA	NA	NA	NA	27.02.2019	EDM
Upper Kai-iwi Shellbed	783	9.40	22	EXT	Upper_Kai_iwi_9.40_#22E_Col_6_b	6	11	425	212	NA	NA	NA	NA	NA	NA	NA	NA	NA	NA	27.02.2019	EDM
Upper Kai-iwi Shellbed	784	9.40	22	EXT	Upper_Kai_iwi_9.40_#22E_Col_6_b	6	13	382	221	NA	NA	NA	NA	NA	NA	NA	NA	NA	NA	27.02.2019	EDM
Upper Kai-iwi Shellbed	785	9.40	22	EXT	Upper_Kai_iwi_9.40_#22E_Col_6_b	6	14	437	229	NA	NA	NA	NA	NA	NA	NA	NA	NA	NA	27.02.2019	EDM
Upper Kai-iwi Shellbed	786	9.40	22	EXT	Upper_Kai_iwi_9.40_#22E_Col_6_b	6	6	347	200	NA	NA	NA	NA	NA	NA	NA	NA	NA	NA	27.02.2019	EDM
Upper Kai-iwi Shellbed	787	9.40	22	EXT	Upper_Kai_iwi_9.40_#22E_Col_6_a	6	16	414	196	NA	NA	NA	NA	NA	NA	NA	NA	NA	NA	27.02.2019	EDM
Upper Kai-iwi Shellbed	788	9.40	22	EXT	Upper_Kai_iwi_9.40_#22E_Col_6_a	6	19	430	213	NA	NA	NA	NA	NA	NA	NA	NA	NA	NA	27.02.2019	EDM
Upper Kai-iwi Shellbed	789	9.40	22	EXT	Upper_Kai_iwi_9.40_#22E_Col_6_a	6	20	416	186	NA	NA	NA	NA	NA	NA	NA	NA	NA	NA	27.02.2019	EDM
Upper Kai-iwi Shellbed	790	9.40	6	INT	Upper_Kai_iwi_9.40_#6I_Col_3_a	3	22	437	229	NA	NA	NA	NA	NA	NA	NA	NA	NA	NA	27.02.2019	EDM
Upper Kai-iwi Shellbed	791	9.40	6	INT	Upper_Kai_iwi_9.40_#6I_Col_3_a	3	24	381	195	NA	NA	NA	NA	NA	NA	NA	NA	NA	NA	27.02.2019	EDM
Upper Kai-iwi Shellbed	792	9.40	6	INT	Upper_Kai_iwi_9.40_#6I_Col_3_a	3	38	450	198	NA	NA	NA	NA	NA	NA	NA	NA	NA	NA	27.02.2019	EDM
Upper Kai-iwi Shellbed	793	9.38	18	EXT	Upper_Kai_iwi_9.38_#18E_Col_9_a	9	1	NA	NA	NA	NA	161	220	NA	NA	NA	NA	NA	NA	27.02.2019	EDM
Upper Kai-iwi Shellbed	794	9.38	11	EXT	Upper_Kai_iwi_9.38_#11E_Col_2_b	2	1	NA	NA	NA	NA	157	240	NA	NA	NA	NA	NA	NA	27.02.2019	EDM
Shakespeare Cliff Basal Sand Shellbed	795	9.34	2	EXT	SCBSSB_9.34_#2E_Col_2_a	2	39	NA	NA	NA	NA	185	260	53	91	NA	NA	NA	NA	27.02.2019	EDM
Shakespeare Cliff Basal Sand Shellbed	796	9.34	2	EXT	SCBSSB_9.34_#2E_Col_2_a	2	6	NA	NA	NA	NA	192	237	50	96	NA	NA	NA	NA	27.02.2019	EDM
Shakespeare Cliff Basal Sand Shellbed	797	9.34	2	EXT	SCBSSB_9.34_#2E_Col_2_a	2	7	NA	NA	NA	NA	211	219	51	86	NA	NA	NA	NA	27.02.2019	EDM
Shakespeare Cliff Basal Sand Shellbed	798	9.34	2	EXT	SCBSSB_9.34_#2E_Col_2_a	2	4	NA	NA	NA	NA	187	274	50	87	NA	NA	NA	NA	27.02.2019	EDM
Shakespeare Cliff Basal Sand Shellbed	799	9.34	2	EXT	SCBSSB_9.34_#2E_Col_2_a	2	3	NA	NA	NA	NA	202	276	NA	NA	NA	NA	NA	NA	27.02.2019	EDM
Shakespeare Cliff Basal Sand Shellbed	800	9.34	2	EXT	SCBSSB_9.34_#2E_Col_2_a	2	8	NA	NA	NA	NA	204	242	NA	NA	NA	NA	NA	NA	27.02.2019	EDM
Shakespeare Cliff Basal Sand Shellbed	801	9.34	2	EXT	SCBSSB_9.34_#2E_Col_2_a	2	27	411	173	NA	NA	NA	NA	NA	NA	NA	NA	NA	NA	27.02.2019	EDM
Shakespeare Cliff Basal Sand Shellbed	802	9.34	2	EXT	SCBSSB_9.34_#2E_Col_2_a	2	5	515	243	NA	NA	NA	NA	NA	NA	NA	NA	NA	NA	27.02.2019	EDM
Shakespeare Cliff Basal Sand Shellbed	803	9.34	2	EXT	SCBSSB_9.34_#2E_Col_2_a	2	10	510	222	NA	NA	NA	NA	NA	NA	NA	NA	NA	NA	27.02.2019	EDM
Shakespeare Cliff Basal Sand Shellbed	804	9.34	2	EXT	SCBSSB_9.34_#2E_Col_2_a	2	20	456	199	NA	NA	NA	NA	NA	NA	NA	NA	NA	NA	27.02.2019	EDM
Shakespeare Cliff Basal Sand Shellbed	805	9.34	2	EXT	SCBSSB_9.34_#2E_Col_2_a	2	23	405	191	NA	NA	NA	NA	NA	NA	NA	NA	NA	NA	27.02.2019	EDM
Shakespeare Cliff Basal Sand Shellbed	806	9.34	2	EXT	SCBSSB_9.34_#2E_Col_2_a	2	33	409	228	NA	NA	NA	NA	NA	NA	NA	NA	NA	NA	27.02.2019	EDM
Shakespeare Cliff Basal Sand Shellbed	807	9.34	2	EXT	SCBSSB_9.34_#2E_Col_2_a	2	31	502	233	NA	NA	NA	NA	NA	NA	NA	NA	NA	NA	27.02.2019	EDM
Shakespeare Cliff Basal Sand Shellbed	808	9.34	2	EXT	SCBSSB_9.34_#2E_Col_2_a	2	42	500	219	NA	NA	NA	NA	NA	NA	NA	NA	NA	NA	27.02.2019	EDM
Shakespeare Cliff Basal Sand Shellbed	809	9.34	2	EXT	SCBSSB_9.34_#2E_Col_2_a	2	36	371	252	NA	NA	NA	NA	NA	NA	NA	NA	NA	NA	27.02.2019	EDM
Shakespeare Cliff Basal Sand Shellbed	810	9.34	2	EXT	SCBSSB_9.34_#2E_Col_2_a	2	47	563	209	NA	NA	NA	NA	NA	NA	NA	NA	NA	NA	27.02.2019	EDM
Shakespeare Cliff Basal Sand Shellbed	811	9.34	2	EXT	SCBSSB_9.34_#2E_Col_2_a	2	50	440	223	NA	NA	NA	NA	NA	NA	NA	NA	NA	NA	27.02.2019	EDM
Shakespeare Cliff Basal Sand Shellbed	812	9.34	2	EXT	SCBSSB_9.34_#2E_Col_2_a	2	52	451	219	NA	NA	NA	NA	NA	NA	NA	NA	NA	NA	27.02.2019	EDM
Shakespeare Cliff Basal Sand Shellbed	813	9.34	2	EXT	SCBSSB_9.34_#2E_Col_2_a	2	51	NA	NA	NA	NA	NA	NA	NA	NA	307	186	NA	NA	27.02.2019	EDM
Shakespeare Cliff Basal Sand Shellbed	814	9.34	2	EXT	SCBSSB_9.34_#2E_Col_2_a	2	9	NA	NA	NA	NA	NA	NA	NA	NA	311	153	NA	NA	27.02.2019	EDM
Shakespeare Cliff Basal Sand Shellbed	815	9.34	2	EXT	SCBSSB_9.34_#2E_Col_2_a	2	32	NA	NA	NA	NA	NA	NA	NA	NA	373	154	NA	NA	27.02.2019	EDM
Shakespeare Cliff Basal Sand Shellbed	816	9.34	2	EXT	SCBSSB_9.34_#2E_Col_2_a	2	12	NA	NA	NA	NA	NA	NA	NA	NA	228	188	NA	NA	27.02.2019	EDM
Shakespeare Cliff Basal Sand Shellbed	817	9.34	2	EXT	SCBSSB_9.34_#2E_Col_2_b	2	30	NA	NA	NA	NA	193	235	NA	NA	NA	NA	NA	NA	27.02.2019	EDM
Shakespeare Cliff Basal Sand Shellbed	818	9.34	2	EXT	SCBSSB_9.34_#2E_Col_2_b	2	9	NA	NA	NA	NA	192	258	NA	NA	NA	NA	NA	NA	27.02.2019	EDM
Shakespeare Cliff Basal Sand Shellbed	819	9.34	2	EXT	SCBSSB_9.34_#2E_Col_2_b	2	5	NA	NA	NA	NA	174	265	49	91	NA	NA	NA	NA	27.02.2019	EDM
Shakespeare Cliff Basal Sand Shellbed	820	9.34	2	EXT	SCBSSB_9.34_#2E_Col_2_b	2	43	NA	NA	NA	NA	205	264	48	88	NA	NA	NA	NA	27.02.2019	EDM
Shakespeare Cliff Basal Sand Shellbed	821	9.34	2	EXT	SCBSSB_9.34_#2E_Col_2_b	2	47	NA	NA	NA	NA	193	255	46	89	NA	NA	NA	NA	27.02.2019	EDM
Shakespeare Cliff Basal Sand Shellbed	822	9.34	2	EXT	SCBSSB_9.34_#2E_Col_2_b	2	52	NA	NA	NA	NA	192	229	47	91	NA	NA	NA	NA	27.02.2019	EDM
Shakespeare Cliff Basal Sand Shellbed	823	9.34	2	EXT	SCBSSB_9.34_#2E_Col_2_b	2	41	471	226	NA	NA	NA	NA	NA	NA	NA	NA	NA	NA	27.02.2019	EDM
Shakespeare Cliff Basal Sand Shellbed	824	9.34	2	EXT	SCBSSB_9.34_#2E_Col_2_b	2	35	425	201	NA	NA	NA	NA	NA	NA	NA	NA	NA	NA	27.02.2019	EDM
Shakespeare Cliff Basal Sand Shellbed	825	9.34	2	EXT	SCBSSB_9.34_#2E_Col_2_b	2	1	409	196	NA	NA	NA	NA	NA	NA	NA	NA	NA	NA	27.02.2019	EDM
Shakespeare Cliff Basal Sand Shellbed	826	9.34	2	EXT	SCBSSB_9.34_#2E_Col_2_b	2	10	462	205	NA	NA	NA	NA	NA	NA	NA	NA	NA	NA	27.02.2019	EDM
Shakespeare Cliff Basal Sand Shellbed	827	9.34	2	EXT	SCBSSB_9.34_#2E_Col_2_b	2	13	435	224	NA	NA	NA	NA	NA	NA	NA	NA	NA	NA	27.02.2019	EDM
Shakespeare Cliff Basal Sand Shellbed	828	9.34	2	EXT	SCBSSB_9.34_#2E_Col_2_b	2	8	649	208	NA	NA	NA	NA	NA	NA	NA	NA	NA	NA	27.02.2019	EDM
Shakespeare Cliff Basal Sand Shellbed	829	9.34	2	EXT	SCBSSB_9.34_#2E_Col_2_b	2	26	516	263	NA	NA	NA	NA	NA	NA	NA	NA	NA	NA	27.02.2019	EDM
Shakespeare Cliff Basal Sand Shellbed	830	9.34	2	EXT	SCBSSB_9.34_#2E_Col_2_b	2	27	454	219	NA	NA	NA	NA	NA	NA	NA	NA	NA	NA	27.02.2019	EDM
Shakespeare Cliff Basal Sand Shellbed	831	9.34	2	EXT	SCBSSB_9.34_#2E_Col_2_b	2	17	385	223	NA	NA	NA	NA	NA	NA	NA	NA	NA	NA	27.02.2019	EDM
Shakespeare Cliff Basal Sand Shellbed	832	9.34	2	EXT	SCBSSB_9.34_#2E_Col_2_b	2	42	406	216	NA	NA	NA	NA	NA	NA	NA	NA	NA	NA	27.02.2019	EDM
Shakespeare Cliff Basal Sand Shellbed	833	9.34	2	EXT	SCBSSB_9.34_#2E_Col_2_b	2	44	376	203	NA	NA	NA	NA	NA	NA	NA	NA	NA	NA	27.02.2019	EDM
Shakespeare Cliff Basal Sand Shellbed	834	9.34	2	EXT	SCBSSB_9.34_#2E_Col_2_b	2	49	419	231	NA	NA	NA	NA	NA	NA	NA	NA	NA	NA	27.02.2019	EDM
Shakespeare Cliff Basal Sand Shellbed	835	9.34	2	EXT	SCBSSB_9.34_#2E_Col_2_b	2	36	419	218	NA	NA	NA	NA	NA	NA	NA	NA	NA	NA	27.02.2019	EDM
Shakespeare Cliff Basal Sand Shellbed	836	9.34	2	EXT	SCBSSB_9.34_#2E_Col_2_b	2	37	415	212	NA	NA	NA	NA	NA	NA	NA	NA	NA	NA	27.02.2019	EDM
Shakespeare Cliff Basal Sand Shellbed	837	9.34	2	EXT	SCBSSB_9.34_#2E_Col_6_a	6	19	NA	NA	NA	NA	190	198	43	85	NA	NA	NA	NA	27.02.2019	EDM
Shakespeare Cliff Basal Sand Shellbed	838	9.34	2	EXT	SCBSSB_9.34_#2E_Col_6_a	6	18	NA	NA	NA	NA	176	225	51	93	NA	NA	NA	NA	27.02.2019	EDM
Shakespeare Cliff Basal Sand Shellbed	839	9.34	2	EXT	SCBSSB_9.34_#2E_Col_6_a	6	20	NA	NA	NA	NA	182	211	51	87	NA	NA	NA	NA	27.02.2019	EDM
Shakespeare Cliff Basal Sand Shellbed	840	9.34	2	EXT	SCBSSB_9.34_#2E_Col_6_a	6	13	NA	NA	NA	NA	164	251	NA	NA	NA	NA	NA	NA	27.02.2019	EDM
Shakespeare Cliff Basal Sand Shellbed	841	9.34	2	EXT	SCBSSB_9.34_#2E_Col_6_a	6	16	NA	NA	NA	NA	175	209	51	87	NA	NA	NA	NA	27.02.2019	EDM
Shakespeare Cliff Basal Sand Shellbed	842	9.34	2	EXT	SCBSSB_9.34_#2E_Col_6_a	6	14	NA	NA	NA	NA	177	205	NA	NA	NA	NA	NA	NA	27.02.2019	EDM
Shakespeare Cliff Basal Sand Shellbed	843	9.34	2	EXT	SCBSSB_9.34_#2E_Col_6_a	6	27	NA	NA	NA	NA	182	225	NA	NA	NA	NA	NA	NA	27.02.2019	EDM
Shakespeare Cliff Basal Sand Shellbed	844	9.34	2	EXT	SCBSSB_9.34_#2E_Col_6_a	6	21	449	228	NA	NA	NA	NA	NA	NA	NA	NA	NA	NA	27.02.2019	EDM
Shakespeare Cliff Basal Sand Shellbed	845	9.34	2	EXT	SCBSSB_9.34_#2E_Col_6_a	6	31	487	267	NA	NA	NA	NA	NA	NA	NA	NA	NA	NA	27.02.2019	EDM
Shakespeare Cliff Basal Sand Shellbed	846	9.34	2	EXT	SCBSSB_9.34_#2E_Col_6_a	6	17	422	224	NA	NA	NA	NA	NA	NA	NA	NA	NA	NA	27.02.2019	EDM
Shakespeare Cliff Basal Sand Shellbed	847	9.34	2	EXT	SCBSSB_9.34_#2E_Col_6_a	6	22	NA	NA	86	69	NA	NA	NA	NA	NA	NA	NA	NA	27.02.2019	EDM
Shakespeare Cliff Basal Sand Shellbed	848	9.34	2	EXT	SCBSSB_9.34_#2E_Col_6_a	6	24	NA	NA	85	72	NA	NA	NA	NA	NA	NA	NA	NA	27.02.2019	EDM
Shakespeare Cliff Basal Sand Shellbed	849	9.34	2	EXT	SCBSSB_9.34_#2E_Col_6_a	6	21	NA	NA	84	67	NA	NA	NA	NA	NA	NA	NA	NA	27.02.2019	EDM
Shakespeare Cliff Basal Sand Shellbed	850	9.34	2	INT	SCBSSB_9.34_#2I_Col_4_a	4	57	NA	NA	NA	NA	194	193	54	85	NA	NA	NA	NA	28.02.2019	EDM
Shakespeare Cliff Basal Sand Shellbed	851	9.34	2	INT	SCBSSB_9.34_#2I_Col_4_a	4	20	NA	NA	NA	NA	216	184	NA	NA	NA	NA	NA	NA	28.02.2019	EDM
Shakespeare Cliff Basal Sand Shellbed	852	9.34	2	INT	SCBSSB_9.34_#2I_Col_4_a	4	59	NA	NA	NA	NA	201	213	NA	NA	NA	NA	NA	NA	28.02.2019	EDM
Shakespeare Cliff Basal Sand Shellbed	853	9.34	2	INT	SCBSSB_9.34_#2I_Col_4_a	4	47	NA	NA	NA	NA	194	184	NA	NA	NA	NA	NA	NA	28.02.2019	EDM
Shakespeare Cliff Basal Sand Shellbed	854	9.34	2	INT	SCBSSB_9.34_#2I_Col_4_a	4	60	NA	NA	NA	NA	213	210	NA	NA	NA	NA	NA	NA	28.02.2019	EDM
Shakespeare Cliff Basal Sand Shellbed	855	9.34	2	INT	SCBSSB_9.34_#2I_Col_4_a	4	18	NA	NA	NA	NA	245	185	NA	NA	NA	NA	NA	NA	28.02.2019	EDM
Shakespeare Cliff Basal Sand Shellbed	856	9.34	2	INT	SCBSSB_9.34_#2I_Col_4_a	4	19	NA	NA	NA	NA	207	214	NA	NA	NA	NA	NA	NA	28.02.2019	EDM
Shakespeare Cliff Basal Sand Shellbed	857	9.34	2	INT	SCBSSB_9.34_#2I_Col_4_a	4	44	NA	NA	NA	NA	207	200	50	87	NA	NA	NA	NA	28.02.2019	EDM
Shakespeare Cliff Basal Sand Shellbed	858	9.34	2	INT	SCBSSB_9.34_#2I_Col_4_a	4	43	NA	NA	NA	NA	223	199	NA	NA	NA	NA	NA	NA	28.02.2019	EDM
Shakespeare Cliff Basal Sand Shellbed	859	9.34	2	INT	SCBSSB_9.34_#2I_Col_4_a	4	49	NA	NA	NA	NA	226	193	NA	NA	NA	NA	NA	NA	28.02.2019	EDM
Shakespeare Cliff Basal Sand Shellbed	860	9.34	2	INT	SCBSSB_9.34_#2I_Col_4_a	4	50	507	217	NA	NA	NA	NA	NA	NA	NA	NA	NA	NA	28.02.2019	EDM
Shakespeare Cliff Basal Sand Shellbed	861	9.34	2	INT	SCBSSB_9.34_#2I_Col_4_a	4	38	458	208	NA	NA	NA	NA	NA	NA	NA	NA	NA	NA	28.02.2019	EDM
Shakespeare Cliff Basal Sand Shellbed	862	9.34	2	INT	SCBSSB_9.34_#2I_Col_4_a	4	1	434	205	NA	NA	NA	NA	NA	NA	NA	NA	NA	NA	28.02.2019	EDM
Shakespeare Cliff Basal Sand Shellbed	863	9.34	2	INT	SCBSSB_9.34_#2I_Col_4_a	4	63	414	196	NA	NA	NA	NA	NA	NA	NA	NA	NA	NA	28.02.2019	EDM
Shakespeare Cliff Basal Sand Shellbed	864	9.34	2	INT	SCBSSB_9.34_#2I_Col_4_a	4	55	453	180	NA	NA	NA	NA	NA	NA	NA	NA	NA	NA	28.02.2019	EDM
Shakespeare Cliff Basal Sand Shellbed	865	9.34	2	INT	SCBSSB_9.34_#2I_Col_4_a	4	62	389	198	NA	NA	NA	NA	NA	NA	NA	NA	NA	NA	28.02.2019	EDM
Shakespeare Cliff Basal Sand Shellbed	866	9.34	2	INT	SCBSSB_9.34_#2I_Col_4_a	4	30	451	195	NA	NA	NA	NA	NA	NA	NA	NA	NA	NA	28.02.2019	EDM
Shakespeare Cliff Basal Sand Shellbed	867	9.34	2	INT	SCBSSB_9.34_#2I_Col_4_a	4	28	385	184	NA	NA	NA	NA	NA	NA	NA	NA	NA	NA	28.02.2019	EDM
Shakespeare Cliff Basal Sand Shellbed	868	9.34	3	EXT	SCBSSB_9.34_#3E_Col_10_a	10	20	NA	NA	NA	NA	173	234	41	88	NA	NA	NA	NA	28.02.2019	EDM
Shakespeare Cliff Basal Sand Shellbed	869	9.34	3	EXT	SCBSSB_9.34_#3E_Col_10_a	10	2	NA	NA	NA	NA	199	203	47	80	NA	NA	NA	NA	28.02.2019	EDM
Shakespeare Cliff Basal Sand Shellbed	870	9.34	3	EXT	SCBSSB_9.34_#3E_Col_10_a	10	11	NA	NA	NA	NA	160	233	44	77	NA	NA	NA	NA	28.02.2019	EDM
Shakespeare Cliff Basal Sand Shellbed	871	9.34	3	EXT	SCBSSB_9.34_#3E_Col_10_a	10	26	NA	NA	NA	NA	148	238	NA	NA	NA	NA	NA	NA	28.02.2019	EDM
Shakespeare Cliff Basal Sand Shellbed	872	9.34	3	EXT	SCBSSB_9.34_#3E_Col_10_a	10	50	NA	NA	NA	NA	171	251	42	82	NA	NA	NA	NA	28.02.2019	EDM
Shakespeare Cliff Basal Sand Shellbed	873	9.34	3	EXT	SCBSSB_9.34_#3E_Col_10_a	10	54	NA	NA	NA	NA	175	249	NA	NA	NA	NA	NA	NA	28.02.2019	EDM
Shakespeare Cliff Basal Sand Shellbed	874	9.34	3	EXT	SCBSSB_9.34_#3E_Col_10_a	10	16	NA	NA	NA	NA	163	256	NA	NA	NA	NA	NA	NA	28.02.2019	EDM
Shakespeare Cliff Basal Sand Shellbed	875	9.34	3	EXT	SCBSSB_9.34_#3E_Col_10_a	10	14	NA	NA	NA	NA	155	233	NA	NA	NA	NA	NA	NA	28.02.2019	EDM
Shakespeare Cliff Basal Sand Shellbed	876	9.34	3	EXT	SCBSSB_9.34_#3E_Col_10_a	10	32	NA	NA	NA	NA	179	260	NA	NA	NA	NA	NA	NA	28.02.2019	EDM
Shakespeare Cliff Basal Sand Shellbed	877	9.34	3	EXT	SCBSSB_9.34_#3E_Col_10_a	10	19	523	240	72	66	NA	NA	NA	NA	NA	NA	NA	NA	28.02.2019	EDM
Shakespeare Cliff Basal Sand Shellbed	878	9.34	3	EXT	SCBSSB_9.34_#3E_Col_10_a	10	30	438	264	NA	NA	NA	NA	NA	NA	NA	NA	NA	NA	28.02.2019	EDM
Shakespeare Cliff Basal Sand Shellbed	879	9.34	3	EXT	SCBSSB_9.34_#3E_Col_10_a	10	55	NA	NA	76	57	NA	NA	NA	NA	NA	NA	NA	NA	28.02.2019	EDM
Shakespeare Cliff Basal Sand Shellbed	880	9.34	3	EXT	SCBSSB_9.34_#3E_Col_10_b	10	39	NA	NA	NA	NA	170	252	41	84	NA	NA	NA	NA	28.02.2019	EDM
Shakespeare Cliff Basal Sand Shellbed	881	9.34	3	EXT	SCBSSB_9.34_#3E_Col_10_b	10	38	NA	NA	NA	NA	171	259	49	84	NA	NA	NA	NA	28.02.2019	EDM
Shakespeare Cliff Basal Sand Shellbed	882	9.34	3	EXT	SCBSSB_9.34_#3E_Col_10_b	10	20	NA	NA	NA	NA	146	267	52	79	NA	NA	NA	NA	28.02.2019	EDM
Shakespeare Cliff Basal Sand Shellbed	883	9.34	3	EXT	SCBSSB_9.34_#3E_Col_10_b	10	34	NA	NA	NA	NA	172	227	50	85	NA	NA	NA	NA	28.02.2019	EDM
Shakespeare Cliff Basal Sand Shellbed	884	9.34	3	EXT	SCBSSB_9.34_#3E_Col_10_b	10	32	NA	NA	NA	NA	168	258	42	81	NA	NA	NA	NA	28.02.2019	EDM
Shakespeare Cliff Basal Sand Shellbed	885	9.34	3	EXT	SCBSSB_9.34_#3E_Col_10_b	10	6	NA	NA	NA	NA	171	223	45	82	NA	NA	NA	NA	28.02.2019	EDM
Shakespeare Cliff Basal Sand Shellbed	886	9.34	3	EXT	SCBSSB_9.34_#3E_Col_10_b	10	49	NA	NA	NA	NA	158	274	NA	NA	NA	NA	NA	NA	28.02.2019	EDM
Shakespeare Cliff Basal Sand Shellbed	887	9.34	3	EXT	SCBSSB_9.34_#3E_Col_10_b	10	45	NA	NA	NA	NA	170	251	NA	NA	NA	NA	NA	NA	28.02.2019	EDM
Shakespeare Cliff Basal Sand Shellbed	888	9.34	3	EXT	SCBSSB_9.34_#3E_Col_10_b	10	10	NA	NA	NA	NA	174	246	53	84	NA	NA	NA	NA	28.02.2019	EDM
Shakespeare Cliff Basal Sand Shellbed	889	9.34	3	EXT	SCBSSB_9.34_#3E_Col_10_b	10	33	410	235	NA	NA	NA	NA	NA	NA	NA	NA	NA	NA	28.02.2019	EDM
Shakespeare Cliff Basal Sand Shellbed	890	9.34	3	EXT	SCBSSB_9.34_#3E_Col_10_b	10	50	556	195	NA	NA	NA	NA	NA	NA	NA	NA	NA	NA	28.02.2019	EDM
Shakespeare Cliff Basal Sand Shellbed	891	9.34	3	EXT	SCBSSB_9.34_#3E_Col_10_b	10	36	499	204	NA	NA	NA	NA	NA	NA	NA	NA	NA	NA	28.02.2019	EDM
Shakespeare Cliff Basal Sand Shellbed	892	9.34	3	EXT	SCBSSB_9.34_#3E_Col_10_b	10	4	533	206	NA	NA	NA	NA	NA	NA	NA	NA	NA	NA	28.02.2019	EDM
Shakespeare Cliff Basal Sand Shellbed	893	9.34	3	EXT	SCBSSB_9.34_#3E_Col_13_a	13	25	NA	NA	NA	NA	203	238	NA	NA	NA	NA	NA	NA	28.02.2019	EDM
Shakespeare Cliff Basal Sand Shellbed	894	9.34	3	EXT	SCBSSB_9.34_#3E_Col_13_a	13	26	NA	NA	NA	NA	192	234	NA	NA	NA	NA	NA	NA	28.02.2019	EDM
Shakespeare Cliff Basal Sand Shellbed	895	9.34	3	EXT	SCBSSB_9.34_#3E_Col_13_a	13	31	NA	NA	NA	NA	181	236	NA	NA	NA	NA	NA	NA	28.02.2019	EDM
Shakespeare Cliff Basal Sand Shellbed	896	9.34	3	EXT	SCBSSB_9.34_#3E_Col_13_a	13	5	NA	NA	NA	NA	184	257	NA	NA	NA	NA	NA	NA	28.02.2019	EDM
Shakespeare Cliff Basal Sand Shellbed	897	9.34	4	EXT	SCBSSB_9.34_#4E_Col_4_a	4	15	462	196	NA	NA	NA	NA	NA	NA	NA	NA	NA	NA	28.02.2019	EDM
Shakespeare Cliff Basal Sand Shellbed	898	9.34	4	EXT	SCBSSB_9.34_#4E_Col_4_a	4	9	498	182	NA	NA	NA	NA	NA	NA	NA	NA	NA	NA	28.02.2019	EDM
Shakespeare Cliff Basal Sand Shellbed	899	9.34	4	EXT	SCBSSB_9.34_#4E_Col_4_a	4	24	490	200	NA	NA	NA	NA	NA	NA	NA	NA	NA	NA	28.02.2019	EDM
Shakespeare Cliff Basal Sand Shellbed	900	9.34	4	EXT	SCBSSB_9.34_#4E_Col_4_a	4	2	379	193	NA	NA	NA	NA	NA	NA	NA	NA	NA	NA	28.02.2019	EDM
Shakespeare Cliff Basal Sand Shellbed	901	9.34	4	EXT	SCBSSB_9.34_#4E_Col_4_a	4	1	398	214	NA	NA	NA	NA	NA	NA	NA	NA	NA	NA	28.02.2019	EDM
Shakespeare Cliff Basal Sand Shellbed	902	9.34	4	EXT	SCBSSB_9.34_#4E_Col_4_a	4	5	NA	NA	NA	NA	NA	NA	NA	NA	245	176	NA	NA	28.02.2019	EDM
Shakespeare Cliff Basal Sand Shellbed	903	9.34	4	EXT	SCBSSB_9.34_#4E_Col_4_a	4	6	NA	NA	NA	NA	NA	NA	NA	NA	283	212	NA	NA	28.02.2019	EDM
Shakespeare Cliff Basal Sand Shellbed	904	9.34	4	EXT	SCBSSB_9.34_#4E_Col_4_a	4	19	NA	NA	NA	NA	NA	NA	NA	NA	331	203	NA	NA	28.02.2019	EDM
Shakespeare Cliff Basal Sand Shellbed	905	9.34	4	EXT	SCBSSB_9.34_#4E_Col_7_a	7	5	416	212	NA	NA	NA	NA	NA	NA	NA	NA	NA	NA	28.02.2019	EDM
Shakespeare Cliff Basal Sand Shellbed	906	9.34	4	EXT	SCBSSB_9.34_#4E_Col_7_a	7	22	417	258	NA	NA	NA	NA	NA	NA	NA	NA	NA	NA	28.02.2019	EDM
Shakespeare Cliff Basal Sand Shellbed	907	9.34	4	EXT	SCBSSB_9.34_#4E_Col_7_a	7	17	528	201	NA	NA	NA	NA	NA	NA	NA	NA	NA	NA	28.02.2019	EDM
Shakespeare Cliff Basal Sand Shellbed	908	9.34	4	EXT	SCBSSB_9.34_#4E_Col_7_a	7	4	569	197	NA	NA	NA	NA	NA	NA	NA	NA	NA	NA	28.02.2019	EDM
Shakespeare Cliff Basal Sand Shellbed	909	9.34	4	EXT	SCBSSB_9.34_#4E_Col_7_a	7	31	594	240	NA	NA	NA	NA	NA	NA	NA	NA	NA	NA	28.02.2019	EDM
Shakespeare Cliff Basal Sand Shellbed	910	9.34	4	INT	SCBSSB_9.34_#4I_Col_9_a	9	49	384	230	NA	NA	NA	NA	NA	NA	NA	NA	NA	NA	28.02.2019	EDM
Shakespeare Cliff Basal Sand Shellbed	911	9.34	4	INT	SCBSSB_9.34_#4I_Col_9_a	9	44	421	213	NA	NA	NA	NA	NA	NA	NA	NA	NA	NA	28.02.2019	EDM
Shakespeare Cliff Basal Sand Shellbed	912	9.34	4	INT	SCBSSB_9.34_#4I_Col_9_a	9	16	447	206	NA	NA	NA	NA	NA	NA	NA	NA	NA	NA	28.02.2019	EDM
Shakespeare Cliff Basal Sand Shellbed	913	9.34	4	INT	SCBSSB_9.34_#4I_Col_9_a	9	13	434	214	NA	NA	NA	NA	NA	NA	NA	NA	NA	NA	28.02.2019	EDM
Shakespeare Cliff Basal Sand Shellbed	914	9.34	4	INT	SCBSSB_9.34_#4I_Col_9_a	9	39	463	206	NA	NA	NA	NA	NA	NA	NA	NA	NA	NA	28.02.2019	EDM
Shakespeare Cliff Basal Sand Shellbed	915	9.34	4	INT	SCBSSB_9.34_#4I_Col_9_a	9	37	443	251	NA	NA	NA	NA	NA	NA	NA	NA	NA	NA	28.02.2019	EDM
Shakespeare Cliff Basal Sand Shellbed	916	9.34	4	INT	SCBSSB_9.34_#4I_Col_9_a	9	59	457	280	NA	NA	NA	NA	NA	NA	NA	NA	NA	NA	28.02.2019	EDM
Shakespeare Cliff Basal Sand Shellbed	917	9.34	4	INT	SCBSSB_9.34_#4I_Col_9_a	9	14	NA	NA	NA	NA	NA	NA	NA	NA	317	204	NA	NA	28.02.2019	EDM
Shakespeare Cliff Basal Sand Shellbed	918	9.34	4	INT	SCBSSB_9.34_#4I_Col_9_a	9	21	NA	NA	NA	NA	NA	NA	NA	NA	357	174	NA	NA	28.02.2019	EDM
Shakespeare Cliff Basal Sand Shellbed	919	9.34	4	INT	SCBSSB_9.34_#4I_Col_9_a	9	33	NA	NA	NA	NA	NA	NA	NA	NA	258	192	NA	NA	28.02.2019	EDM
Shakespeare Cliff Basal Sand Shellbed	920	9.34	4	INT	SCBSSB_9.34_#4I_Col_9_b	9	33	452	220	NA	NA	NA	NA	NA	NA	NA	NA	NA	NA	28.02.2019	EDM
Shakespeare Cliff Basal Sand Shellbed	921	9.34	4	INT	SCBSSB_9.34_#4I_Col_9_b	9	27	442	227	NA	NA	NA	NA	NA	NA	NA	NA	NA	NA	28.02.2019	EDM
Shakespeare Cliff Basal Sand Shellbed	922	9.34	4	INT	SCBSSB_9.34_#4I_Col_9_b	9	4	401	246	NA	NA	NA	NA	NA	NA	NA	NA	NA	NA	28.02.2019	EDM
Shakespeare Cliff Basal Sand Shellbed	923	9.34	4	INT	SCBSSB_9.34_#4I_Col_9_b	9	42	401	237	NA	NA	NA	NA	NA	NA	NA	NA	NA	NA	28.02.2019	EDM
Shakespeare Cliff Basal Sand Shellbed	924	9.34	4	INT	SCBSSB_9.34_#4I_Col_9_b	9	22	452	264	NA	NA	NA	NA	NA	NA	NA	NA	NA	NA	28.02.2019	EDM
Shakespeare Cliff Basal Sand Shellbed	925	9.34	5	INT	SCBSSB_9.34_#5I_Col_1_a	1	29	494	212	NA	NA	NA	NA	NA	NA	NA	NA	NA	NA	28.02.2019	EDM
Shakespeare Cliff Basal Sand Shellbed	926	9.34	5	INT	SCBSSB_9.34_#5I_Col_1_a	1	18	490	185	NA	NA	NA	NA	NA	NA	NA	NA	NA	NA	28.02.2019	EDM
Shakespeare Cliff Basal Sand Shellbed	927	9.34	5	INT	SCBSSB_9.34_#5I_Col_1_a	1	28	488	209	NA	NA	NA	NA	NA	NA	NA	NA	NA	NA	28.02.2019	EDM
Shakespeare Cliff Basal Sand Shellbed	928	9.34	5	INT	SCBSSB_9.34_#5I_Col_1_a	1	10	447	217	NA	NA	NA	NA	NA	NA	NA	NA	NA	NA	28.02.2019	EDM
Shakespeare Cliff Basal Sand Shellbed	929	9.34	5	INT	SCBSSB_9.34_#5I_Col_1_a	1	32	429	206	NA	NA	NA	NA	NA	NA	NA	NA	NA	NA	28.02.2019	EDM
Shakespeare Cliff Basal Sand Shellbed	930	9.34	5	INT	SCBSSB_9.34_#5I_Col_1_a	1	33	528	219	NA	NA	NA	NA	NA	NA	NA	NA	NA	NA	28.02.2019	EDM
Shakespeare Cliff Basal Sand Shellbed	931	9.34	5	INT	SCBSSB_9.34_#5I_Col_1_a	1	2	500	184	NA	NA	NA	NA	NA	NA	NA	NA	NA	NA	28.02.2019	EDM
Shakespeare Cliff Basal Sand Shellbed	932	9.34	5	INT	SCBSSB_9.34_#5I_Col_1_a	1	1	404	172	NA	NA	NA	NA	NA	NA	NA	NA	NA	NA	28.02.2019	EDM
Shakespeare Cliff Basal Sand Shellbed	933	9.34	5	INT	SCBSSB_9.34_#5I_Col_1_a	1	9	NA	NA	NA	NA	NA	NA	NA	NA	316	157	NA	NA	28.02.2019	EDM
Shakespeare Cliff Basal Sand Shellbed	934	9.34	5	INT	SCBSSB_9.34_#5I_Col_1_a	1	4	NA	NA	NA	NA	NA	NA	NA	NA	393	185	NA	NA	28.02.2019	EDM
Shakespeare Cliff Basal Sand Shellbed	935	9.34	5	INT	SCBSSB_9.34_#5I_Col_2_a	2	32	548	187	NA	NA	NA	NA	NA	NA	NA	NA	NA	NA	28.02.2019	EDM
Shakespeare Cliff Basal Sand Shellbed	936	9.34	5	INT	SCBSSB_9.34_#5I_Col_2_a	2	35	372	247	NA	NA	NA	NA	NA	NA	NA	NA	NA	NA	28.02.2019	EDM
Shakespeare Cliff Basal Sand Shellbed	937	9.34	5	INT	SCBSSB_9.34_#5I_Col_2_a	2	24	395	236	NA	NA	NA	NA	NA	NA	NA	NA	NA	NA	28.02.2019	EDM
Shakespeare Cliff Basal Sand Shellbed	938	9.34	5	INT	SCBSSB_9.34_#5I_Col_2_a	2	23	461	214	NA	NA	NA	NA	NA	NA	NA	NA	NA	NA	28.02.2019	EDM
Shakespeare Cliff Basal Sand Shellbed	939	9.34	5	INT	SCBSSB_9.34_#5I_Col_2_a	2	29	428	234	NA	NA	NA	NA	NA	NA	NA	NA	NA	NA	28.02.2019	EDM
Shakespeare Cliff Basal Sand Shellbed	940	9.34	5	INT	SCBSSB_9.34_#5I_Col_7_a	7	30	440	248	NA	NA	NA	NA	NA	NA	NA	NA	NA	NA	28.02.2019	EDM
Shakespeare Cliff Basal Sand Shellbed	941	9.34	5	INT	SCBSSB_9.34_#5I_Col_7_a	7	4	457	220	NA	NA	NA	NA	NA	NA	NA	NA	NA	NA	28.02.2019	EDM
Shakespeare Cliff Basal Sand Shellbed	942	9.34	5	INT	SCBSSB_9.34_#5I_Col_7_a	7	3	530	232	NA	NA	NA	NA	NA	NA	NA	NA	NA	NA	28.02.2019	EDM
Shakespeare Cliff Basal Sand Shellbed	943	9.34	5	INT	SCBSSB_9.34_#5I_Col_7_a	7	1	434	246	NA	NA	NA	NA	NA	NA	NA	NA	NA	NA	28.02.2019	EDM
Shakespeare Cliff Basal Sand Shellbed	944	9.34	5	INT	SCBSSB_9.34_#5I_Col_7_a	7	23	558	241	NA	NA	NA	NA	NA	NA	NA	NA	NA	NA	28.02.2019	EDM
Shakespeare Cliff Basal Sand Shellbed	945	9.34	5	INT	SCBSSB_9.34_#5I_Col_7_a	7	26	NA	NA	74	60	NA	NA	NA	NA	NA	NA	NA	NA	28.02.2019	EDM
Shakespeare Cliff Basal Sand Shellbed	946	9.34	5	INT	SCBSSB_9.34_#5I_Col_7_a	7	13	NA	NA	69	70	NA	NA	NA	NA	NA	NA	NA	NA	28.02.2019	EDM
Shakespeare Cliff Basal Sand Shellbed	947	9.34	10	EXT	SCBSSB_9.34_#10E_Col_1_a	1	56	NA	NA	NA	NA	171	241	44	71	NA	NA	NA	NA	28.02.2019	EDM
Shakespeare Cliff Basal Sand Shellbed	948	9.34	10	EXT	SCBSSB_9.34_#10E_Col_1_a	1	28	NA	NA	NA	NA	163	215	41	81	NA	NA	NA	NA	28.02.2019	EDM
Shakespeare Cliff Basal Sand Shellbed	949	9.34	10	EXT	SCBSSB_9.34_#10E_Col_1_a	1	29	NA	NA	NA	NA	176	242	43	82	NA	NA	NA	NA	28.02.2019	EDM
Shakespeare Cliff Basal Sand Shellbed	950	9.34	10	EXT	SCBSSB_9.34_#10E_Col_1_a	1	5	NA	NA	NA	NA	172	242	36	77	NA	NA	NA	NA	28.02.2019	EDM
Shakespeare Cliff Basal Sand Shellbed	951	9.34	10	EXT	SCBSSB_9.34_#10E_Col_1_a	1	4	NA	NA	NA	NA	181	231	NA	NA	NA	NA	NA	NA	28.02.2019	EDM
Shakespeare Cliff Basal Sand Shellbed	952	9.34	10	EXT	SCBSSB_9.34_#10E_Col_1_a	1	38	NA	NA	NA	NA	195	237	42	81	NA	NA	NA	NA	28.02.2019	EDM
Shakespeare Cliff Basal Sand Shellbed	953	9.34	10	EXT	SCBSSB_9.34_#10E_Col_1_a	1	45	NA	NA	NA	NA	171	240	NA	NA	NA	NA	NA	NA	28.02.2019	EDM
Shakespeare Cliff Basal Sand Shellbed	954	9.34	10	EXT	SCBSSB_9.34_#10E_Col_1_a	1	41	532	165	NA	NA	NA	NA	NA	NA	NA	NA	NA	NA	28.02.2019	EDM
Shakespeare Cliff Basal Sand Shellbed	955	9.34	10	EXT	SCBSSB_9.34_#10E_Col_1_a	1	46	474	241	NA	NA	NA	NA	NA	NA	NA	NA	NA	NA	28.02.2019	EDM
Shakespeare Cliff Basal Sand Shellbed	956	9.34	10	EXT	SCBSSB_9.34_#10E_Col_1_a	1	57	415	183	NA	NA	NA	NA	NA	NA	NA	NA	NA	NA	28.02.2019	EDM
Shakespeare Cliff Basal Sand Shellbed	957	9.34	10	EXT	SCBSSB_9.34_#10E_Col_1_a	1	44	456	197	NA	NA	NA	NA	NA	NA	NA	NA	NA	NA	28.02.2019	EDM
Shakespeare Cliff Basal Sand Shellbed	958	9.34	10	EXT	SCBSSB_9.34_#10E_Col_1_a	1	8	NA	NA	NA	NA	NA	NA	NA	NA	310	137	NA	NA	28.02.2019	EDM
Shakespeare Cliff Basal Sand Shellbed	959	9.34	10	EXT	SCBSSB_9.34_#10E_Col_1_b	1	7	NA	NA	NA	NA	179	231	NA	NA	NA	NA	NA	NA	28.02.2019	EDM
Shakespeare Cliff Basal Sand Shellbed	960	9.34	10	EXT	SCBSSB_9.34_#10E_Col_1_b	1	22	NA	NA	NA	NA	156	235	NA	NA	NA	NA	NA	NA	28.02.2019	EDM
Shakespeare Cliff Basal Sand Shellbed	961	9.34	10	EXT	SCBSSB_9.34_#10E_Col_1_b	1	23	NA	NA	NA	NA	152	250	NA	NA	NA	NA	NA	NA	28.02.2019	EDM
Shakespeare Cliff Basal Sand Shellbed	962	9.34	10	EXT	SCBSSB_9.34_#10E_Col_1_b	1	5	NA	NA	NA	NA	178	252	NA	NA	NA	NA	NA	NA	28.02.2019	EDM
Shakespeare Cliff Basal Sand Shellbed	963	9.34	10	EXT	SCBSSB_9.34_#10E_Col_1_b	1	9	NA	NA	NA	NA	159	235	NA	NA	NA	NA	NA	NA	28.02.2019	EDM
Shakespeare Cliff Basal Sand Shellbed	964	9.34	10	EXT	SCBSSB_9.34_#10E_Col_1_b	1	29	NA	NA	NA	NA	187	217	NA	NA	NA	NA	NA	NA	28.02.2019	EDM
Shakespeare Cliff Basal Sand Shellbed	965	9.34	10	EXT	SCBSSB_9.34_#10E_Col_1_b	1	30	489	222	NA	NA	NA	NA	NA	NA	NA	NA	NA	NA	28.02.2019	EDM
Shakespeare Cliff Basal Sand Shellbed	966	9.34	10	EXT	SCBSSB_9.34_#10E_Col_1_b	1	14	492	196	NA	NA	NA	NA	NA	NA	NA	NA	NA	NA	28.02.2019	EDM
Shakespeare Cliff Basal Sand Shellbed	967	9.34	10	EXT	SCBSSB_9.34_#10E_Col_1_b	1	2	440	198	NA	NA	NA	NA	NA	NA	NA	NA	NA	NA	28.02.2019	EDM
Shakespeare Cliff Basal Sand Shellbed	968	9.34	10	EXT	SCBSSB_9.34_#10E_Col_1_b	1	3	469	165	NA	NA	NA	NA	NA	NA	NA	NA	NA	NA	28.02.2019	EDM
Shakespeare Cliff Basal Sand Shellbed	969	9.34	10	EXT	SCBSSB_9.34_#10E_Col_1_b	1	18	484	205	NA	NA	NA	NA	NA	NA	NA	NA	NA	NA	28.02.2019	EDM
Shakespeare Cliff Basal Sand Shellbed	970	9.34	10	EXT	SCBSSB_9.34_#10E_Col_1_c	1	46	516	219	NA	NA	NA	NA	NA	NA	NA	NA	NA	NA	28.02.2019	EDM
Shakespeare Cliff Basal Sand Shellbed	971	9.34	10	EXT	SCBSSB_9.34_#10E_Col_1_c	1	25	407	194	NA	NA	NA	NA	NA	NA	NA	NA	NA	NA	28.02.2019	EDM
Shakespeare Cliff Basal Sand Shellbed	972	9.34	10	EXT	SCBSSB_9.34_#10E_Col_1_c	1	39	488	192	68	70	NA	NA	NA	NA	NA	NA	NA	NA	28.02.2019	EDM
Shakespeare Cliff Basal Sand Shellbed	973	9.34	10	EXT	SCBSSB_9.34_#10E_Col_1_c	1	47	441	175	NA	NA	NA	NA	NA	NA	NA	NA	NA	NA	28.02.2019	EDM
Shakespeare Cliff Basal Sand Shellbed	974	9.34	10	EXT	SCBSSB_9.34_#10E_Col_1_c	1	38	528	185	NA	NA	NA	NA	NA	NA	NA	NA	NA	NA	28.02.2019	EDM
Shakespeare Cliff Basal Sand Shellbed	975	9.34	10	EXT	SCBSSB_9.34_#10E_Col_1_c	1	41	519	169	NA	NA	NA	NA	NA	NA	NA	NA	NA	NA	28.02.2019	EDM
Shakespeare Cliff Basal Sand Shellbed	976	9.34	10	EXT	SCBSSB_9.34_#10E_Col_1_c	1	40	NA	NA	62	64	NA	NA	NA	NA	NA	NA	NA	NA	28.02.2019	EDM
Shakespeare Cliff Basal Sand Shellbed	977	9.34	10	EXT	SCBSSB_9.34_#10E_Col_2_a	2	9	NA	NA	NA	NA	185	245	NA	NA	NA	NA	NA	NA	28.02.2019	EDM
Shakespeare Cliff Basal Sand Shellbed	978	9.34	10	EXT	SCBSSB_9.34_#10E_Col_2_a	2	30	NA	NA	NA	NA	173	201	NA	NA	NA	NA	NA	NA	28.02.2019	EDM
Shakespeare Cliff Basal Sand Shellbed	979	9.34	10	EXT	SCBSSB_9.34_#10E_Col_2_a	2	21	NA	NA	NA	NA	175	241	NA	NA	NA	NA	NA	NA	28.02.2019	EDM
Shakespeare Cliff Basal Sand Shellbed	980	9.34	10	EXT	SCBSSB_9.34_#10E_Col_2_a	2	18	NA	NA	NA	NA	192	192	NA	NA	NA	NA	NA	NA	28.02.2019	EDM
Shakespeare Cliff Basal Sand Shellbed	981	9.34	10	EXT	SCBSSB_9.34_#10E_Col_2_a	2	25	NA	NA	NA	NA	193	207	NA	NA	NA	NA	NA	NA	28.02.2019	EDM
Shakespeare Cliff Basal Sand Shellbed	982	9.34	10	EXT	SCBSSB_9.34_#10E_Col_2_a	2	26	NA	NA	NA	NA	184	209	NA	NA	NA	NA	NA	NA	28.02.2019	EDM
Shakespeare Cliff Basal Sand Shellbed	983	9.34	10	EXT	SCBSSB_9.34_#10E_Col_2_a	2	11	NA	NA	NA	NA	169	220	NA	NA	NA	NA	NA	NA	28.02.2019	EDM
Shakespeare Cliff Basal Sand Shellbed	984	9.34	10	EXT	SCBSSB_9.34_#10E_Col_2_a	2	29	455	159	73	65	NA	NA	NA	NA	NA	NA	NA	NA	28.02.2019	EDM
Shakespeare Cliff Basal Sand Shellbed	985	9.34	10	EXT	SCBSSB_9.34_#10E_Col_2_a	2	27	518	226	NA	NA	NA	NA	NA	NA	NA	NA	NA	NA	28.02.2019	EDM
Shakespeare Cliff Basal Sand Shellbed	986	9.34	10	EXT	SCBSSB_9.34_#10E_Col_2_a	2	40	409	246	NA	NA	NA	NA	NA	NA	NA	NA	NA	NA	28.02.2019	EDM
Shakespeare Cliff Basal Sand Shellbed	987	9.34	10	EXT	SCBSSB_9.34_#10E_Col_2_a	2	6	378	240	NA	NA	NA	NA	NA	NA	NA	NA	NA	NA	28.02.2019	EDM
Shakespeare Cliff Basal Sand Shellbed	988	9.34	10	EXT	SCBSSB_9.34_#10E_Col_2_a	2	1	426	272	NA	NA	NA	NA	NA	NA	NA	NA	NA	NA	28.02.2019	EDM
Shakespeare Cliff Basal Sand Shellbed	989	9.34	10	EXT	SCBSSB_9.34_#10E_Col_2_a	2	2	400	199	NA	NA	NA	NA	NA	NA	NA	NA	NA	NA	28.02.2019	EDM
Shakespeare Cliff Basal Sand Shellbed	990	9.34	10	EXT	SCBSSB_9.34_#10E_Col_2_a	2	5	501	231	NA	NA	NA	NA	NA	NA	NA	NA	NA	NA	28.02.2019	EDM
Shakespeare Cliff Basal Sand Shellbed	991	9.34	10	EXT	SCBSSB_9.34_#10E_Col_2_b	2	7	NA	NA	NA	NA	186	256	NA	NA	NA	NA	NA	NA	28.02.2019	EDM
Shakespeare Cliff Basal Sand Shellbed	992	9.34	10	EXT	SCBSSB_9.34_#10E_Col_2_b	2	5	NA	NA	NA	NA	162	233	NA	NA	NA	NA	NA	NA	28.02.2019	EDM
Shakespeare Cliff Basal Sand Shellbed	993	9.34	10	EXT	SCBSSB_9.34_#10E_Col_2_b	2	13	NA	NA	NA	NA	186	170	NA	NA	NA	NA	NA	NA	28.02.2019	EDM
Shakespeare Cliff Basal Sand Shellbed	994	9.34	10	EXT	SCBSSB_9.34_#10E_Col_2_b	2	12	NA	NA	NA	NA	186	198	NA	NA	NA	NA	NA	NA	28.02.2019	EDM
Shakespeare Cliff Basal Sand Shellbed	995	9.34	10	EXT	SCBSSB_9.34_#10E_Col_2_b	2	15	NA	NA	NA	NA	163	222	NA	NA	NA	NA	NA	NA	28.02.2019	EDM
Shakespeare Cliff Basal Sand Shellbed	996	9.34	10	EXT	SCBSSB_9.34_#10E_Col_3_a	3	38	427	186	NA	NA	NA	NA	NA	NA	NA	NA	NA	NA	28.02.2019	EDM
Shakespeare Cliff Basal Sand Shellbed	997	9.34	10	EXT	SCBSSB_9.34_#10E_Col_3_a	3	37	470	189	NA	NA	NA	NA	NA	NA	NA	NA	NA	NA	28.02.2019	EDM
Shakespeare Cliff Basal Sand Shellbed	998	9.34	10	EXT	SCBSSB_9.34_#10E_Col_3_a	3	14	440	183	NA	NA	NA	NA	NA	NA	NA	NA	NA	NA	28.02.2019	EDM
Shakespeare Cliff Basal Sand Shellbed	999	9.34	10	EXT	SCBSSB_9.34_#10E_Col_4_a	4	23	NA	NA	NA	NA	163	216	NA	NA	NA	NA	NA	NA	28.02.2019	EDM
Shakespeare Cliff Basal Sand Shellbed	1000	9.34	10	EXT	SCBSSB_9.34_#10E_Col_4_a	4	26	NA	NA	NA	NA	173	217	NA	NA	NA	NA	NA	NA	28.02.2019	EDM
Shakespeare Cliff Basal Sand Shellbed	1001	9.34	10	EXT	SCBSSB_9.34_#10E_Col_4_a	4	46	542	179	NA	NA	NA	NA	NA	NA	NA	NA	NA	NA	28.02.2019	EDM
Shakespeare Cliff Basal Sand Shellbed	1002	9.34	10	EXT	SCBSSB_9.34_#10E_Col_4_a	4	1	437	182	NA	NA	NA	NA	NA	NA	NA	NA	NA	NA	28.02.2019	EDM
Shakespeare Cliff Basal Sand Shellbed	1003	9.34	10	EXT	SCBSSB_9.34_#10E_Col_4_b	4	2	NA	NA	NA	NA	156	208	NA	NA	NA	NA	NA	NA	28.02.2019	EDM
Shakespeare Cliff Basal Sand Shellbed	1004	9.34	10	EXT	SCBSSB_9.34_#10E_Col_4_b	4	6	NA	NA	NA	NA	180	197	NA	NA	NA	NA	NA	NA	28.02.2019	EDM
Shakespeare Cliff Basal Sand Shellbed	1005	9.34	10	EXT	SCBSSB_9.34_#10E_Col_4_b	4	7	NA	NA	NA	NA	164	213	NA	NA	NA	NA	NA	NA	28.02.2019	EDM
Shakespeare Cliff Basal Sand Shellbed	1006	9.34	10	EXT	SCBSSB_9.34_#10E_Col_4_b	4	41	415	194	NA	NA	NA	NA	NA	NA	NA	NA	NA	NA	28.02.2019	EDM
Shakespeare Cliff Basal Sand Shellbed	1007	9.34	10	EXT	SCBSSB_9.34_#10E_Col_4_b	4	29	505	249	NA	NA	NA	NA	NA	NA	NA	NA	NA	NA	28.02.2019	EDM
Shakespeare Cliff Basal Sand Shellbed	1008	9.34	10	INT	SCBSSB_9.34_#10I_Col_15_a	15	9	NA	NA	NA	NA	173	223	46	70	NA	NA	NA	NA	28.02.2019	EDM
Shakespeare Cliff Basal Sand Shellbed	1009	9.34	10	INT	SCBSSB_9.34_#10I_Col_15_a	15	3	NA	NA	NA	NA	199	234	NA	NA	NA	NA	NA	NA	28.02.2019	EDM
Shakespeare Cliff Basal Sand Shellbed	1010	9.34	10	INT	SCBSSB_9.34_#10I_Col_15_a	15	16	NA	NA	NA	NA	177	251	NA	NA	NA	NA	NA	NA	28.02.2019	EDM
Shakespeare Cliff Basal Sand Shellbed	1011	9.34	10	INT	SCBSSB_9.34_#10I_Col_15_a	15	18	NA	NA	NA	NA	194	247	52	90	NA	NA	NA	NA	28.02.2019	EDM
Shakespeare Cliff Basal Sand Shellbed	1012	9.34	10	INT	SCBSSB_9.34_#10I_Col_15_a	15	46	NA	NA	NA	NA	167	250	NA	NA	NA	NA	NA	NA	28.02.2019	EDM
Shakespeare Cliff Basal Sand Shellbed	1013	9.34	10	INT	SCBSSB_9.34_#10I_Col_15_a	15	42	NA	NA	NA	NA	155	227	47	85	NA	NA	NA	NA	28.02.2019	EDM
Shakespeare Cliff Basal Sand Shellbed	1014	9.34	12	INT	SCBSSB_9.34_#12I_Col_1_a	1	36	NA	NA	NA	NA	183	250	NA	NA	NA	NA	NA	NA	28.02.2019	EDM
Shakespeare Cliff Basal Sand Shellbed	1015	9.34	12	INT	SCBSSB_9.34_#12I_Col_1_a	1	37	NA	NA	NA	NA	197	244	NA	NA	NA	NA	NA	NA	28.02.2019	EDM
Shakespeare Cliff Basal Sand Shellbed	1016	9.34	12	INT	SCBSSB_9.34_#12I_Col_1_a	1	33	NA	NA	NA	NA	191	257	NA	NA	NA	NA	NA	NA	28.02.2019	EDM
Shakespeare Cliff Basal Sand Shellbed	1017	9.34	12	INT	SCBSSB_9.34_#12I_Col_1_a	1	29	NA	NA	NA	NA	204	205	NA	NA	NA	NA	NA	NA	28.02.2019	EDM
Shakespeare Cliff Basal Sand Shellbed	1018	9.34	12	INT	SCBSSB_9.34_#12I_Col_1_a	1	27	NA	NA	NA	NA	198	230	NA	NA	NA	NA	NA	NA	28.02.2019	EDM
Shakespeare Cliff Basal Sand Shellbed	1019	9.34	12	INT	SCBSSB_9.34_#12I_Col_1_a	1	12	NA	NA	NA	NA	183	247	NA	NA	NA	NA	NA	NA	28.02.2019	EDM
Shakespeare Cliff Basal Sand Shellbed	1020	9.34	12	INT	SCBSSB_9.34_#12I_Col_1_a	1	25	520	256	NA	NA	NA	NA	NA	NA	NA	NA	NA	NA	28.02.2019	EDM
Shakespeare Cliff Basal Sand Shellbed	1021	9.34	12	INT	SCBSSB_9.34_#12I_Col_1_a	1	21	433	230	NA	NA	NA	NA	NA	NA	NA	NA	NA	NA	28.02.2019	EDM
Shakespeare Cliff Basal Sand Shellbed	1022	9.34	12	INT	SCBSSB_9.34_#12I_Col_1_a	1	35	414	211	NA	NA	NA	NA	NA	NA	NA	NA	NA	NA	28.02.2019	EDM
Shakespeare Cliff Basal Sand Shellbed	1023	9.34	12	INT	SCBSSB_9.34_#12I_Col_1_a	1	16	462	226	NA	NA	NA	NA	NA	NA	NA	NA	NA	NA	28.02.2019	EDM
Shakespeare Cliff Basal Sand Shellbed	1024	9.34	12	INT	SCBSSB_9.34_#12I_Col_1_a	1	3	508	219	NA	NA	NA	NA	NA	NA	NA	NA	NA	NA	28.02.2019	EDM
Shakespeare Cliff Basal Sand Shellbed	1025	9.34	12	INT	SCBSSB_9.34_#12I_Col_2_a	2	18	NA	NA	NA	NA	205	209	NA	NA	NA	NA	NA	NA	28.02.2019	EDM
Shakespeare Cliff Basal Sand Shellbed	1026	9.34	12	INT	SCBSSB_9.34_#12I_Col_2_a	2	2	NA	NA	NA	NA	205	220	NA	NA	NA	NA	NA	NA	28.02.2019	EDM
Shakespeare Cliff Basal Sand Shellbed	1027	9.34	12	INT	SCBSSB_9.34_#12I_Col_2_a	2	7	NA	NA	NA	NA	182	214	NA	NA	NA	NA	NA	NA	28.02.2019	EDM
Shakespeare Cliff Basal Sand Shellbed	1028	9.34	12	INT	SCBSSB_9.34_#12I_Col_2_a	2	1	NA	NA	NA	NA	199	220	NA	NA	NA	NA	NA	NA	28.02.2019	EDM
Shakespeare Cliff Basal Sand Shellbed	1029	9.34	12	INT	SCBSSB_9.34_#12I_Col_2_a	2	17	NA	NA	NA	NA	196	219	NA	NA	NA	NA	NA	NA	28.02.2019	EDM
Shakespeare Cliff Basal Sand Shellbed	1030	9.34	12	INT	SCBSSB_9.34_#12I_Col_2_a	2	34	NA	NA	NA	NA	193	228	NA	NA	NA	NA	NA	NA	28.02.2019	EDM
Shakespeare Cliff Basal Sand Shellbed	1031	9.34	12	INT	SCBSSB_9.34_#12I_Col_2_a	2	37	NA	NA	NA	NA	190	215	NA	NA	NA	NA	NA	NA	28.02.2019	EDM
Shakespeare Cliff Basal Sand Shellbed	1032	9.34	12	INT	SCBSSB_9.34_#12I_Col_2_a	2	38	NA	NA	NA	NA	154	239	NA	NA	NA	NA	NA	NA	28.02.2019	EDM
Shakespeare Cliff Basal Sand Shellbed	1033	9.34	12	INT	SCBSSB_9.34_#12I_Col_2_a	2	28	NA	NA	NA	NA	161	224	NA	NA	NA	NA	NA	NA	28.02.2019	EDM
Shakespeare Cliff Basal Sand Shellbed	1034	9.34	12	INT	SCBSSB_9.34_#12I_Col_2_a	2	40	NA	NA	NA	NA	167	217	NA	NA	NA	NA	NA	NA	28.02.2019	EDM
Shakespeare Cliff Basal Sand Shellbed	1035	9.34	12	INT	SCBSSB_9.34_#12I_Col_2_a	2	14	420	174	NA	NA	NA	NA	NA	NA	NA	NA	NA	NA	28.02.2019	EDM
Shakespeare Cliff Basal Sand Shellbed	1036	9.34	12	INT	SCBSSB_9.34_#12I_Col_2_a	2	16	410	171	NA	NA	NA	NA	NA	NA	NA	NA	NA	NA	28.02.2019	EDM
Shakespeare Cliff Basal Sand Shellbed	1037	9.34	12	INT	SCBSSB_9.34_#12I_Col_2_a	2	21	432	185	NA	NA	NA	NA	NA	NA	NA	NA	NA	NA	28.02.2019	EDM
Shakespeare Cliff Basal Sand Shellbed	1038	9.34	12	INT	SCBSSB_9.34_#12I_Col_2_a	2	35	418	210	NA	NA	NA	NA	NA	NA	NA	NA	NA	NA	28.02.2019	EDM
Shakespeare Cliff Basal Sand Shellbed	1039	9.34	12	INT	SCBSSB_9.34_#12I_Col_2_a	2	19	NA	NA	69	61	NA	NA	NA	NA	NA	NA	NA	NA	28.02.2019	EDM
Shakespeare Cliff Basal Sand Shellbed	1040	9.34	12	INT	SCBSSB_9.34_#12I_Col_5_a	5	42	NA	NA	NA	NA	188	231	38	76	NA	NA	NA	NA	28.02.2019	EDM
Shakespeare Cliff Basal Sand Shellbed	1041	9.34	12	INT	SCBSSB_9.34_#12I_Col_5_a	5	26	NA	NA	NA	NA	175	218	36	77	NA	NA	NA	NA	28.02.2019	EDM
Shakespeare Cliff Basal Sand Shellbed	1042	9.34	12	INT	SCBSSB_9.34_#12I_Col_5_a	5	25	NA	NA	NA	NA	168	254	44	78	NA	NA	NA	NA	28.02.2019	EDM
Shakespeare Cliff Basal Sand Shellbed	1043	9.34	12	INT	SCBSSB_9.34_#12I_Col_5_a	5	33	NA	NA	NA	NA	164	246	46	85	NA	NA	NA	NA	28.02.2019	EDM
Shakespeare Cliff Basal Sand Shellbed	1044	9.34	12	INT	SCBSSB_9.34_#12I_Col_5_a	5	31	553	195	NA	NA	NA	NA	NA	NA	NA	NA	NA	NA	28.02.2019	EDM
Shakespeare Cliff Basal Sand Shellbed	1045	9.34	12	INT	SCBSSB_9.34_#12I_Col_5_a	5	35	481	222	NA	NA	NA	NA	NA	NA	NA	NA	NA	NA	28.02.2019	EDM
Shakespeare Cliff Basal Sand Shellbed	1046	9.34	12	INT	SCBSSB_9.34_#12I_Col_5_a	5	37	505	192	NA	NA	NA	NA	NA	NA	NA	NA	NA	NA	28.02.2019	EDM
Shakespeare Cliff Basal Sand Shellbed	1047	9.34	12	INT	SCBSSB_9.34_#12I_Col_5_a	5	39	521	214	NA	NA	NA	NA	NA	NA	NA	NA	NA	NA	28.02.2019	EDM
Shakespeare Cliff Basal Sand Shellbed	1048	9.34	12	INT	SCBSSB_9.34_#12I_Col_5_a	5	34	558	218	NA	NA	NA	NA	NA	NA	NA	NA	NA	NA	28.02.2019	EDM
Shakespeare Cliff Basal Sand Shellbed	1049	9.34	12	INT	SCBSSB_9.34_#12I_Col_5_a	5	28	531	218	64	61	NA	NA	NA	NA	NA	NA	NA	NA	28.02.2019	EDM
Shakespeare Cliff Basal Sand Shellbed	1050	9.34	12	INT	SCBSSB_9.34_#12I_Col_5_b	5	23	NA	NA	NA	NA	185	239	44	77	NA	NA	NA	NA	28.02.2019	EDM
Shakespeare Cliff Basal Sand Shellbed	1051	9.34	12	INT	SCBSSB_9.34_#12I_Col_5_b	5	7	NA	NA	NA	NA	198	212	32	79	NA	NA	NA	NA	28.02.2019	EDM
Shakespeare Cliff Basal Sand Shellbed	1052	9.34	12	INT	SCBSSB_9.34_#12I_Col_5_b	5	5	NA	NA	NA	NA	168	216	NA	NA	NA	NA	NA	NA	28.02.2019	EDM
Shakespeare Cliff Basal Sand Shellbed	1053	9.34	12	INT	SCBSSB_9.34_#12I_Col_5_b	5	58	NA	NA	NA	NA	173	245	NA	NA	NA	NA	NA	NA	28.02.2019	EDM
Shakespeare Cliff Basal Sand Shellbed	1054	9.34	12	INT	SCBSSB_9.34_#12I_Col_5_b	5	45	NA	NA	NA	NA	159	237	NA	NA	NA	NA	NA	NA	28.02.2019	EDM
Shakespeare Cliff Basal Sand Shellbed	1055	9.34	12	INT	SCBSSB_9.34_#12I_Col_5_b	5	44	NA	NA	NA	NA	174	232	41	74	NA	NA	NA	NA	28.02.2019	EDM
Shakespeare Cliff Basal Sand Shellbed	1056	9.34	12	INT	SCBSSB_9.34_#12I_Col_5_b	5	37	NA	NA	NA	NA	166	199	NA	NA	NA	NA	NA	NA	28.02.2019	EDM
Shakespeare Cliff Basal Sand Shellbed	1057	9.34	12	INT	SCBSSB_9.34_#12I_Col_5_b	5	17	NA	NA	NA	NA	171	250	NA	NA	NA	NA	NA	NA	28.02.2019	EDM
Shakespeare Cliff Basal Sand Shellbed	1058	9.34	12	INT	SCBSSB_9.34_#12I_Col_5_b	5	15	NA	NA	NA	NA	184	244	38	81	NA	NA	NA	NA	28.02.2019	EDM
Shakespeare Cliff Basal Sand Shellbed	1059	9.34	12	INT	SCBSSB_9.34_#12I_Col_5_b	5	24	NA	NA	NA	NA	185	243	43	80	NA	NA	NA	NA	28.02.2019	EDM
Shakespeare Cliff Basal Sand Shellbed	1060	9.34	12	INT	SCBSSB_9.34_#12I_Col_5_b	5	23	NA	NA	NA	NA	185	230	NA	NA	NA	NA	NA	NA	28.02.2019	EDM
Shakespeare Cliff Basal Sand Shellbed	1061	9.34	12	INT	SCBSSB_9.34_#12I_Col_5_b	5	46	432	227	NA	NA	NA	NA	NA	NA	NA	NA	NA	NA	28.02.2019	EDM
Shakespeare Cliff Basal Sand Shellbed	1062	9.34	12	INT	SCBSSB_9.34_#12I_Col_5_b	5	57	492	184	NA	NA	NA	NA	NA	NA	NA	NA	NA	NA	28.02.2019	EDM
Shakespeare Cliff Basal Sand Shellbed	1063	9.34	12	INT	SCBSSB_9.34_#12I_Col_5_b	5	22	460	175	NA	NA	NA	NA	NA	NA	NA	NA	NA	NA	28.02.2019	EDM
Shakespeare Cliff Basal Sand Shellbed	1064	9.34	12	INT	SCBSSB_9.34_#12I_Col_5_b	5	8	568	198	NA	NA	NA	NA	NA	NA	NA	NA	NA	NA	28.02.2019	EDM
Shakespeare Cliff Basal Sand Shellbed	1065	9.34	12	INT	SCBSSB_9.34_#12I_Col_5_c	5	30	NA	NA	NA	NA	178	224	41	85	NA	NA	NA	NA	28.02.2019	EDM
Shakespeare Cliff Basal Sand Shellbed	1066	9.34	12	INT	SCBSSB_9.34_#12I_Col_5_c	5	31	NA	NA	NA	NA	181	251	48	83	NA	NA	NA	NA	28.02.2019	EDM
Shakespeare Cliff Basal Sand Shellbed	1067	9.34	12	INT	SCBSSB_9.34_#12I_Col_5_c	5	37	NA	NA	NA	NA	175	225	42	83	NA	NA	NA	NA	28.02.2019	EDM
Shakespeare Cliff Basal Sand Shellbed	1068	9.34	12	INT	SCBSSB_9.34_#12I_Col_5_c	5	9	NA	NA	NA	NA	204	242	NA	NA	NA	NA	NA	NA	28.02.2019	EDM
Shakespeare Cliff Basal Sand Shellbed	1069	9.34	12	INT	SCBSSB_9.34_#12I_Col_5_c	5	8	NA	NA	NA	NA	197	223	NA	NA	NA	NA	NA	NA	28.02.2019	EDM
Shakespeare Cliff Basal Sand Shellbed	1070	9.34	12	INT	SCBSSB_9.34_#12I_Col_5_c	5	17	NA	NA	NA	NA	176	235	40	85	NA	NA	NA	NA	28.02.2019	EDM
Shakespeare Cliff Basal Sand Shellbed	1071	9.34	12	INT	SCBSSB_9.34_#12I_Col_5_c	5	26	NA	NA	NA	NA	166	236	NA	NA	NA	NA	NA	NA	28.02.2019	EDM
Shakespeare Cliff Basal Sand Shellbed	1072	9.34	12	INT	SCBSSB_9.34_#12I_Col_5_c	5	27	NA	NA	NA	NA	181	245	44	85	NA	NA	NA	NA	28.02.2019	EDM
Shakespeare Cliff Basal Sand Shellbed	1073	9.34	12	INT	SCBSSB_9.34_#12I_Col_5_c	5	39	NA	NA	NA	NA	196	242	NA	NA	NA	NA	NA	NA	28.02.2019	EDM
Shakespeare Cliff Basal Sand Shellbed	1074	9.34	12	INT	SCBSSB_9.34_#12I_Col_5_c	5	38	549	226	NA	NA	NA	NA	NA	NA	NA	NA	NA	NA	28.02.2019	EDM
Shakespeare Cliff Basal Sand Shellbed	1075	9.34	12	INT	SCBSSB_9.34_#12I_Col_5_c	5	28	537	199	NA	NA	NA	NA	NA	NA	NA	NA	NA	NA	28.02.2019	EDM
Shakespeare Cliff Basal Sand Shellbed	1076	9.34	12	INT	SCBSSB_9.34_#12I_Col_5_c	5	15	505	182	NA	NA	NA	NA	NA	NA	NA	NA	NA	NA	28.02.2019	EDM
Shakespeare Cliff Basal Sand Shellbed	1077	9.34	12	INT	SCBSSB_9.34_#12I_Col_5_c	5	36	608	206	NA	NA	NA	NA	NA	NA	NA	NA	NA	NA	28.02.2019	EDM
Shakespeare Cliff Basal Sand Shellbed	1078	9.34	12	INT	SCBSSB_9.34_#12I_Col_5_c	5	7	546	186	NA	NA	NA	NA	NA	NA	NA	NA	NA	NA	28.02.2019	EDM
Shakespeare Cliff Basal Sand Shellbed	1079	9.34	16	EXT	SCBSSB_9.34_#16E_Col_4_a	4	10	391	214	NA	NA	NA	NA	NA	NA	NA	NA	NA	NA	28.02.2019	EDM
Shakespeare Cliff Basal Sand Shellbed	1080	9.34	16	EXT	SCBSSB_9.34_#16E_Col_4_a	4	3	440	218	NA	NA	NA	NA	NA	NA	NA	NA	NA	NA	28.02.2019	EDM
Shakespeare Cliff Basal Sand Shellbed	1081	9.34	16	EXT	SCBSSB_9.34_#16E_Col_4_a	4	15	472	180	NA	NA	NA	NA	NA	NA	NA	NA	NA	NA	28.02.2019	EDM
Shakespeare Cliff Basal Sand Shellbed	1082	9.34	16	EXT	SCBSSB_9.34_#16E_Col_4_a	4	24	480	190	NA	NA	NA	NA	NA	NA	NA	NA	NA	NA	28.02.2019	EDM
Shakespeare Cliff Basal Sand Shellbed	1083	9.34	16	EXT	SCBSSB_9.34_#16E_Col_4_a	4	11	490	205	NA	NA	NA	NA	NA	NA	NA	NA	NA	NA	28.02.2019	EDM
Landguard Formation	1084	97	1	INT	Landguard_97_#1I_Col_2_a	2	17	378	210	NA	NA	NA	NA	NA	NA	NA	NA	NA	NA	01.03.2019	EDM
Landguard Formation	1085	97	1	INT	Landguard_97_#1I_Col_2_a	2	14	435	168	NA	NA	NA	NA	NA	NA	NA	NA	NA	NA	01.03.2019	EDM
Landguard Formation	1086	97	1	INT	Landguard_97_#1I_Col_2_a	2	13	380	204	NA	NA	NA	NA	NA	NA	NA	NA	NA	NA	01.03.2019	EDM
Landguard Formation	1087	97	1	INT	Landguard_97_#1I_Col_2_a	2	2	NA	NA	NA	NA	NA	NA	NA	NA	222	178	NA	NA	01.03.2019	EDM
Landguard Formation	1088	97	1	INT	Landguard_97_#1I_Col_2_a	2	9	NA	NA	NA	NA	NA	NA	NA	NA	306	134	NA	NA	01.03.2019	EDM
Landguard Formation	1089	97	1	INT	Landguard_97_#1I_Col_2_a	2	1	NA	NA	NA	NA	NA	NA	NA	NA	321	203	NA	NA	01.03.2019	EDM
Landguard Formation	1090	97	1	INT	Landguard_97_#1I_Col_2_a	2	4	NA	NA	NA	NA	NA	NA	NA	NA	217	194	NA	NA	01.03.2019	EDM
Landguard Formation	1091	97	1	INT	Landguard_97_#1I_Col_2_a	2	5	NA	NA	NA	NA	NA	NA	NA	NA	297	146	NA	NA	01.03.2019	EDM
Landguard Formation	1092	97	4	INT	Landguard_97_#4I_Col_5_a	5	49	388	240	NA	NA	NA	NA	NA	NA	NA	NA	NA	NA	01.03.2019	EDM
Landguard Formation	1093	97	4	INT	Landguard_97_#4I_Col_5_a	5	45	405	243	NA	NA	NA	NA	NA	NA	NA	NA	NA	NA	01.03.2019	EDM
Landguard Formation	1094	97	4	INT	Landguard_97_#4I_Col_5_a	5	16	526	193	NA	NA	NA	NA	NA	NA	NA	NA	NA	NA	01.03.2019	EDM
Landguard Formation	1095	97	4	INT	Landguard_97_#4I_Col_5_a	5	52	465	221	NA	NA	NA	NA	NA	NA	NA	NA	NA	NA	01.03.2019	EDM
Landguard Formation	1096	97	4	INT	Landguard_97_#4I_Col_5_a	5	33	366	211	NA	NA	NA	NA	NA	NA	NA	NA	NA	NA	01.03.2019	EDM
Landguard Formation	1097	97	4	INT	Landguard_97_#4I_Col_6_a	6	28	429	185	NA	NA	NA	NA	NA	NA	NA	NA	NA	NA	01.03.2019	EDM
Landguard Formation	1098	97	4	INT	Landguard_97_#4I_Col_6_a	6	29	430	201	NA	NA	NA	NA	NA	NA	NA	NA	NA	NA	01.03.2019	EDM
Landguard Formation	1099	97	4	INT	Landguard_97_#4I_Col_6_a	6	35	384	225	NA	NA	NA	NA	NA	NA	NA	NA	NA	NA	01.03.2019	EDM
Landguard Formation	1100	97	4	INT	Landguard_97_#4I_Col_6_a	6	26	431	213	NA	NA	NA	NA	NA	NA	NA	NA	NA	NA	01.03.2019	EDM
Landguard Formation	1101	97	4	INT	Landguard_97_#4I_Col_6_a	6	39	420	209	NA	NA	NA	NA	NA	NA	NA	NA	NA	NA	01.03.2019	EDM
Landguard Formation	1102	97	6	EXT	Landguard_97_#6E_Col_8_a	8	1	NA	NA	NA	NA	175	219	NA	NA	NA	NA	NA	NA	01.03.2019	EDM
Landguard Formation	1103	97	6	EXT	Landguard_97_#6E_Col_8_a	8	20	477	217	87	68	NA	NA	NA	NA	NA	NA	NA	NA	01.03.2019	EDM
Landguard Formation	1104	97	6	EXT	Landguard_97_#6E_Col_8_a	8	43	420	218	NA	NA	NA	NA	NA	NA	NA	NA	NA	NA	01.03.2019	EDM
Landguard Formation	1105	97	6	EXT	Landguard_97_#6E_Col_8_a	8	45	621	216	NA	NA	NA	NA	NA	NA	NA	NA	NA	NA	01.03.2019	EDM
Landguard Formation	1106	97	6	EXT	Landguard_97_#6E_Col_8_a	8	27	422	201	NA	NA	NA	NA	NA	NA	NA	NA	NA	NA	01.03.2019	EDM
Landguard Formation	1107	97	6	EXT	Landguard_97_#6E_Col_8_a	8	23	NA	NA	72	60	NA	NA	NA	NA	NA	NA	NA	NA	01.03.2019	EDM
Landguard Formation	1108	97	6	EXT	Landguard_97_#6E_Col_8_b	8	1	NA	NA	NA	NA	164	198	NA	NA	NA	NA	NA	NA	01.03.2019	EDM
Landguard Formation	1109	97	6	EXT	Landguard_97_#6E_Col_8_b	8	2	NA	NA	NA	NA	154	205	NA	NA	NA	NA	NA	NA	01.03.2019	EDM
Landguard Formation	1110	97	6	EXT	Landguard_97_#6E_Col_8_b	8	3	NA	NA	NA	NA	149	203	NA	NA	NA	NA	NA	NA	01.03.2019	EDM
Landguard Formation	1111	97	6	EXT	Landguard_97_#6E_Col_8_b	8	30	440	218	NA	NA	NA	NA	NA	NA	NA	NA	NA	NA	01.03.2019	EDM
Landguard Formation	1112	97	6	EXT	Landguard_97_#6E_Col_8_b	8	36	383	222	NA	NA	NA	NA	NA	NA	NA	NA	NA	NA	01.03.2019	EDM
Landguard Formation	1113	97	6	EXT	Landguard_97_#6E_Col_8_b	8	59	451	228	NA	NA	NA	NA	NA	NA	NA	NA	NA	NA	01.03.2019	EDM
Landguard Formation	1114	97	6	EXT	Landguard_97_#6E_Col_8_b	8	5	NA	NA	NA	NA	NA	NA	NA	NA	256	155	NA	NA	01.03.2019	EDM
Landguard Formation	1115	97	6	EXT	Landguard_97_#6E_Col_11_a	11	48	479	184	NA	NA	NA	NA	NA	NA	NA	NA	NA	NA	01.03.2019	EDM
Landguard Formation	1116	97	6	EXT	Landguard_97_#6E_Col_11_a	11	25	405	225	NA	NA	NA	NA	NA	NA	NA	NA	NA	NA	01.03.2019	EDM
Landguard Formation	1117	97	6	EXT	Landguard_97_#6E_Col_11_a	11	23	464	226	NA	NA	NA	NA	NA	NA	NA	NA	NA	NA	01.03.2019	EDM
Landguard Formation	1118	97	6	EXT	Landguard_97_#6E_Col_11_a	11	16	487	226	NA	NA	NA	NA	NA	NA	NA	NA	NA	NA	01.03.2019	EDM
Landguard Formation	1119	97	6	EXT	Landguard_97_#6E_Col_11_a	11	20	493	176	NA	NA	NA	NA	NA	NA	NA	NA	NA	NA	01.03.2019	EDM
Landguard Formation	1120	97	6	EXT	Landguard_97_#6E_Col_11_a	11	33	458	224	NA	NA	NA	NA	NA	NA	NA	NA	NA	NA	01.03.2019	EDM
Landguard Formation	1121	97	6	EXT	Landguard_97_#6E_Col_11_a	11	49	518	185	NA	NA	NA	NA	NA	NA	NA	NA	NA	NA	01.03.2019	EDM
Landguard Formation	1122	97	6	EXT	Landguard_97_#6E_Col_11_a	11	39	536	178	NA	NA	NA	NA	NA	NA	NA	NA	NA	NA	01.03.2019	EDM
Landguard Formation	1123	97	6	EXT	Landguard_97_#6E_Col_11_a	11	15	NA	NA	74	68	NA	NA	NA	NA	NA	NA	NA	NA	01.03.2019	EDM
Landguard Formation	1124	97	6	EXT	Landguard_97_#6E_Col_11_a	11	13	NA	NA	68	62	NA	NA	NA	NA	NA	NA	NA	NA	01.03.2019	EDM
Landguard Formation	1125	97	13	INT	Landguard_97_#13I_Col_1_a	1	1	NA	NA	NA	NA	140	216	NA	NA	NA	NA	NA	NA	01.03.2019	EDM
Landguard Formation	1126	97	13	INT	Landguard_97_#13I_Col_1_a	1	56	419	168	NA	NA	NA	NA	NA	NA	NA	NA	NA	NA	01.03.2019	EDM
Landguard Formation	1127	97	13	INT	Landguard_97_#13I_Col_1_a	1	31	478	180	NA	NA	NA	NA	NA	NA	NA	NA	NA	NA	01.03.2019	EDM
Landguard Formation	1128	97	13	INT	Landguard_97_#13I_Col_1_a	1	40	445	185	NA	NA	NA	NA	NA	NA	NA	NA	NA	NA	01.03.2019	EDM
Landguard Formation	1129	97	13	INT	Landguard_97_#13I_Col_1_a	1	53	452	226	NA	NA	NA	NA	NA	NA	NA	NA	NA	NA	01.03.2019	EDM
Landguard Formation	1130	97	13	INT	Landguard_97_#13I_Col_1_a	1	33	NA	NA	68	58	NA	NA	NA	NA	NA	NA	NA	NA	01.03.2019	EDM
Landguard Formation	1131	97	14	EXT	Landguard_97_#14E_Col_3_a	3	11	NA	NA	NA	NA	173	161	NA	NA	NA	NA	NA	NA	01.03.2019	EDM
Landguard Formation	1132	97	14	EXT	Landguard_97_#14E_Col_3_a	3	12	NA	NA	NA	NA	168	168	NA	NA	NA	NA	NA	NA	01.03.2019	EDM
Landguard Formation	1133	97	14	EXT	Landguard_97_#14E_Col_3_a	3	17	300	152	NA	NA	NA	NA	NA	NA	NA	NA	NA	NA	01.03.2019	EDM
Landguard Formation	1134	97	14	EXT	Landguard_97_#14E_Col_3_a	3	24	386	213	NA	NA	NA	NA	NA	NA	NA	NA	NA	NA	01.03.2019	EDM
Landguard Formation	1135	97	14	EXT	Landguard_97_#14E_Col_3_a	3	21	458	197	NA	NA	NA	NA	NA	NA	NA	NA	NA	NA	01.03.2019	EDM
Landguard Formation	1136	97	14	EXT	Landguard_97_#14E_Col_3_a	3	50	455	185	NA	NA	NA	NA	NA	NA	NA	NA	NA	NA	01.03.2019	EDM
Landguard Formation	1137	97	14	EXT	Landguard_97_#14E_Col_3_a	3	49	435	195	NA	NA	NA	NA	NA	NA	NA	NA	NA	NA	01.03.2019	EDM
Landguard Formation	1138	97	14	EXT	Landguard_97_#14E_Col_3_a	3	4	NA	NA	NA	NA	NA	NA	NA	NA	315	165	NA	NA	01.03.2019	EDM
Landguard Formation	1139	97	14	EXT	Landguard_97_#14E_Col_3_a	3	6	NA	NA	NA	NA	NA	NA	NA	NA	387	145	NA	NA	01.03.2019	EDM
Landguard Formation	1140	97	14	EXT	Landguard_97_#14E_Col_3_b	3	32	472	183	NA	NA	NA	NA	NA	NA	NA	NA	NA	NA	01.03.2019	EDM
Landguard Formation	1141	97	14	EXT	Landguard_97_#14E_Col_3_b	3	36	381	175	NA	NA	NA	NA	NA	NA	NA	NA	NA	NA	01.03.2019	EDM
Landguard Formation	1142	97	14	EXT	Landguard_97_#14E_Col_3_b	3	7	433	207	NA	NA	NA	NA	NA	NA	NA	NA	NA	NA	01.03.2019	EDM
Landguard Formation	1143	97	14	EXT	Landguard_97_#14E_Col_3_b	3	44	425	179	NA	NA	NA	NA	NA	NA	NA	NA	NA	NA	01.03.2019	EDM
Landguard Formation	1144	97	14	EXT	Landguard_97_#14E_Col_3_b	3	50	454	177	NA	NA	NA	NA	NA	NA	NA	NA	NA	NA	01.03.2019	EDM
Landguard Formation	1145	97	14	EXT	Landguard_97_#14E_Col_4_a	4	40	478	244	NA	NA	NA	NA	NA	NA	NA	NA	NA	NA	01.03.2019	EDM
Landguard Formation	1146	97	14	EXT	Landguard_97_#14E_Col_4_a	4	10	448	261	NA	NA	NA	NA	NA	NA	NA	NA	NA	NA	01.03.2019	EDM
Landguard Formation	1147	97	14	EXT	Landguard_97_#14E_Col_4_a	4	9	438	274	NA	NA	NA	NA	NA	NA	NA	NA	NA	NA	01.03.2019	EDM
Landguard Formation	1148	97	14	EXT	Landguard_97_#14E_Col_4_a	4	28	469	267	NA	NA	NA	NA	NA	NA	NA	NA	NA	NA	01.03.2019	EDM
Landguard Formation	1149	97	14	EXT	Landguard_97_#14E_Col_4_a	4	35	448	251	NA	NA	NA	NA	NA	NA	NA	NA	NA	NA	01.03.2019	EDM
Landguard Formation	1150	97	14	EXT	Landguard_97_#14E_Col_4_a	4	6	NA	NA	NA	NA	NA	NA	NA	NA	369	197	NA	NA	01.03.2019	EDM
Landguard Formation	1151	97	14	EXT	Landguard_97_#14E_Col_4_a	4	2	NA	NA	NA	NA	NA	NA	NA	NA	346	167	NA	NA	01.03.2019	EDM
Landguard Formation	1152	97	14	EXT	Landguard_97_#14E_Col_5_b	5	13	NA	NA	NA	NA	202	227	NA	NA	NA	NA	NA	NA	01.03.2019	EDM
Landguard Formation	1153	97	14	EXT	Landguard_97_#14E_Col_5_b	5	1	NA	NA	NA	NA	222	234	NA	NA	NA	NA	NA	NA	01.03.2019	EDM
Landguard Formation	1154	97	14	EXT	Landguard_97_#14E_Col_5_b	5	2	NA	NA	NA	NA	221	263	NA	NA	NA	NA	NA	NA	01.03.2019	EDM
Landguard Formation	1155	97	14	EXT	Landguard_97_#14E_Col_5_b	5	6	NA	NA	NA	NA	188	226	NA	NA	NA	NA	NA	NA	01.03.2019	EDM
Landguard Formation	1156	97	14	EXT	Landguard_97_#14E_Col_5_b	5	3	NA	NA	NA	NA	212	254	44	92	NA	NA	NA	NA	01.03.2019	EDM
Landguard Formation	1157	97	14	EXT	Landguard_97_#14E_Col_5_b	5	17	NA	NA	NA	NA	178	258	NA	NA	NA	NA	NA	NA	01.03.2019	EDM
Landguard Formation	1158	97	14	EXT	Landguard_97_#14E_Col_5_b	5	7	NA	NA	NA	NA	183	232	NA	NA	NA	NA	NA	NA	01.03.2019	EDM
Landguard Formation	1159	97	14	EXT	Landguard_97_#14E_Col_5_b	5	9	NA	NA	NA	NA	200	261	NA	NA	NA	NA	NA	NA	01.03.2019	EDM
Landguard Formation	1160	97	14	EXT	Landguard_97_#14E_Col_5_b	5	42	440	163	73	71	NA	NA	NA	NA	NA	NA	NA	NA	01.03.2019	EDM
Landguard Formation	1161	97	14	EXT	Landguard_97_#14E_Col_5_b	5	40	491	219	NA	NA	NA	NA	NA	NA	NA	NA	NA	NA	01.03.2019	EDM
Landguard Formation	1162	97	14	EXT	Landguard_97_#14E_Col_5_b	5	32	474	200	NA	NA	NA	NA	NA	NA	NA	NA	NA	NA	01.03.2019	EDM
Landguard Formation	1163	97	14	EXT	Landguard_97_#14E_Col_5_b	5	35	457	210	84	77	NA	NA	NA	NA	NA	NA	NA	NA	01.03.2019	EDM
Landguard Formation	1164	97	14	EXT	Landguard_97_#14E_Col_5_b	5	30	NA	NA	88	75	NA	NA	NA	NA	NA	NA	NA	NA	01.03.2019	EDM
Landguard Formation	1165	97	14	EXT	Landguard_97_#14E_Col_5_c	5	2	NA	NA	NA	NA	176	238	48	84	NA	NA	NA	NA	01.03.2019	EDM
Landguard Formation	1166	97	14	EXT	Landguard_97_#14E_Col_5_c	5	13	NA	NA	NA	NA	173	265	NA	NA	NA	NA	NA	NA	01.03.2019	EDM
Landguard Formation	1167	97	14	EXT	Landguard_97_#14E_Col_5_c	5	7	NA	NA	NA	NA	217	241	NA	NA	NA	NA	NA	NA	01.03.2019	EDM
Landguard Formation	1168	97	14	EXT	Landguard_97_#14E_Col_5_c	5	11	NA	NA	NA	NA	218	235	NA	NA	NA	NA	NA	NA	01.03.2019	EDM
Landguard Formation	1169	97	14	EXT	Landguard_97_#14E_Col_5_c	5	8	NA	NA	NA	NA	214	235	NA	NA	NA	NA	NA	NA	01.03.2019	EDM
Landguard Formation	1170	97	14	EXT	Landguard_97_#14E_Col_5_c	5	4	NA	NA	NA	NA	232	266	NA	NA	NA	NA	NA	NA	01.03.2019	EDM
Landguard Formation	1171	97	14	EXT	Landguard_97_#14E_Col_5_c	5	9	NA	NA	NA	NA	227	221	NA	NA	NA	NA	NA	NA	01.03.2019	EDM
Landguard Formation	1172	97	14	EXT	Landguard_97_#14E_Col_5_c	5	10	NA	NA	NA	NA	193	239	NA	NA	NA	NA	NA	NA	01.03.2019	EDM
Landguard Formation	1173	97	14	EXT	Landguard_97_#14E_Col_5_c	5	15	NA	NA	NA	NA	196	231	NA	NA	NA	NA	NA	NA	01.03.2019	EDM
Landguard Formation	1174	97	14	EXT	Landguard_97_#14E_Col_5_c	5	3	NA	NA	NA	NA	189	224	NA	NA	NA	NA	NA	NA	01.03.2019	EDM
Landguard Formation	1175	97	14	EXT	Landguard_97_#14E_Col_5_c	5	20	427	210	NA	NA	NA	NA	NA	NA	NA	NA	NA	NA	01.03.2019	EDM
Landguard Formation	1176	97	14	EXT	Landguard_97_#14E_Col_5_c	5	39	543	222	93	81	NA	NA	NA	NA	NA	NA	NA	NA	01.03.2019	EDM
Landguard Formation	1177	97	14	EXT	Landguard_97_#14E_Col_5_c	5	28	492	184	91	77	NA	NA	NA	NA	NA	NA	NA	NA	01.03.2019	EDM
Landguard Formation	1178	97	14	EXT	Landguard_97_#14E_Col_6_a	6	20	NA	NA	NA	NA	162	210	44	72	NA	NA	NA	NA	01.03.2019	EDM
Landguard Formation	1179	97	14	EXT	Landguard_97_#14E_Col_6_a	6	3	NA	NA	NA	NA	164	181	38	68	NA	NA	NA	NA	01.03.2019	EDM
Landguard Formation	1180	97	14	EXT	Landguard_97_#14E_Col_6_a	6	2	NA	NA	NA	NA	155	216	NA	NA	NA	NA	NA	NA	01.03.2019	EDM
Landguard Formation	1181	97	14	EXT	Landguard_97_#14E_Col_6_a	6	5	NA	NA	NA	NA	161	208	NA	NA	NA	NA	NA	NA	01.03.2019	EDM
Landguard Formation	1182	97	14	EXT	Landguard_97_#14E_Col_6_a	6	6	NA	NA	NA	NA	152	197	NA	NA	NA	NA	NA	NA	01.03.2019	EDM
Landguard Formation	1183	97	14	EXT	Landguard_97_#14E_Col_6_a	6	8	NA	NA	NA	NA	132	185	NA	NA	NA	NA	NA	NA	01.03.2019	EDM
Landguard Formation	1184	97	14	EXT	Landguard_97_#14E_Col_6_a	6	19	NA	NA	NA	NA	160	197	44	78	NA	NA	NA	NA	01.03.2019	EDM
Landguard Formation	1185	97	14	EXT	Landguard_97_#14E_Col_6_a	6	18	NA	NA	NA	NA	168	222	NA	NA	NA	NA	NA	NA	01.03.2019	EDM
Landguard Formation	1186	97	14	EXT	Landguard_97_#14E_Col_6_a	6	27	NA	NA	NA	NA	179	220	NA	NA	NA	NA	NA	NA	01.03.2019	EDM
Landguard Formation	1187	97	14	EXT	Landguard_97_#14E_Col_6_a	6	15	NA	NA	NA	NA	172	209	40	78	NA	NA	NA	NA	01.03.2019	EDM
Landguard Formation	1188	97	14	EXT	Landguard_97_#14E_Col_6_a	6	9	NA	NA	NA	NA	161	222	NA	NA	NA	NA	NA	NA	01.03.2019	EDM
Landguard Formation	1189	97	14	EXT	Landguard_97_#14E_Col_6_a	6	12	NA	NA	NA	NA	154	200	49	81	NA	NA	NA	NA	01.03.2019	EDM
Landguard Formation	1190	97	14	EXT	Landguard_97_#14E_Col_6_a	6	13	NA	NA	NA	NA	166	200	NA	NA	NA	NA	NA	NA	01.03.2019	EDM
Landguard Formation	1191	97	14	EXT	Landguard_97_#14E_Col_6_a	6	37	388	162	NA	NA	NA	NA	NA	NA	NA	NA	NA	NA	01.03.2019	EDM
Landguard Formation	1192	97	14	EXT	Landguard_97_#14E_Col_6_a	6	67	366	165	NA	NA	NA	NA	NA	NA	NA	NA	NA	NA	01.03.2019	EDM
Landguard Formation	1193	97	14	EXT	Landguard_97_#14E_Col_6_a	6	58	430	194	NA	NA	NA	NA	NA	NA	NA	NA	NA	NA	01.03.2019	EDM
Landguard Formation	1194	97	14	EXT	Landguard_97_#14E_Col_6_a	6	60	357	181	66	66	NA	NA	NA	NA	NA	NA	NA	NA	01.03.2019	EDM
Landguard Formation	1195	97	14	EXT	Landguard_97_#14E_Col_6_a	6	47	416	185	NA	NA	NA	NA	NA	NA	NA	NA	NA	NA	01.03.2019	EDM
Landguard Formation	1196	97	14	EXT	Landguard_97_#14E_Col_6_a	6	14	NA	NA	NA	NA	146	213	44	80	NA	NA	NA	NA	01.03.2019	EDM
Landguard Formation	1197	97	14	EXT	Landguard_97_#14E_Col_6_a	6	10	NA	NA	NA	NA	152	178	NA	NA	NA	NA	NA	NA	01.03.2019	EDM
Landguard Formation	1198	97	14	EXT	Landguard_97_#14E_Col_6_a	6	11	NA	NA	NA	NA	177	194	NA	NA	NA	NA	NA	NA	01.03.2019	EDM
Landguard Formation	1199	97	14	EXT	Landguard_97_#14E_Col_6_b	6	2	NA	NA	NA	NA	168	220	NA	NA	NA	NA	NA	NA	01.03.2019	EDM
Landguard Formation	1200	97	14	EXT	Landguard_97_#14E_Col_6_b	6	3	NA	NA	NA	NA	172	223	NA	NA	NA	NA	NA	NA	01.03.2019	EDM
Landguard Formation	1201	97	14	EXT	Landguard_97_#14E_Col_6_b	6	11	NA	NA	NA	NA	166	168	NA	NA	NA	NA	NA	NA	01.03.2019	EDM
Landguard Formation	1202	97	14	EXT	Landguard_97_#14E_Col_6_b	6	9	NA	NA	NA	NA	166	202	NA	NA	NA	NA	NA	NA	01.03.2019	EDM
Landguard Formation	1203	97	14	EXT	Landguard_97_#14E_Col_6_b	6	10	NA	NA	NA	NA	172	193	NA	NA	NA	NA	NA	NA	01.03.2019	EDM
Landguard Formation	1204	97	14	EXT	Landguard_97_#14E_Col_6_b	6	6	NA	NA	NA	NA	181	222	NA	NA	NA	NA	NA	NA	01.03.2019	EDM
Landguard Formation	1205	97	14	EXT	Landguard_97_#14E_Col_6_b	6	5	NA	NA	NA	NA	162	202	NA	NA	NA	NA	NA	NA	01.03.2019	EDM
Landguard Formation	1206	97	14	EXT	Landguard_97_#14E_Col_6_b	6	17	NA	NA	NA	NA	147	222	NA	NA	NA	NA	NA	NA	01.03.2019	EDM
Landguard Formation	1207	97	14	EXT	Landguard_97_#14E_Col_6_b	6	20	NA	NA	NA	NA	163	243	NA	NA	NA	NA	NA	NA	01.03.2019	EDM
Landguard Formation	1208	97	14	EXT	Landguard_97_#14E_Col_6_b	6	15	NA	NA	NA	NA	168	217	NA	NA	NA	NA	NA	NA	01.03.2019	EDM
Landguard Formation	1209	97	14	EXT	Landguard_97_#14E_Col_6_b	6	1	NA	NA	NA	NA	164	204	NA	NA	NA	NA	NA	NA	01.03.2019	EDM
Landguard Formation	1210	97	14	EXT	Landguard_97_#14E_Col_6_b	6	70	415	170	NA	NA	NA	NA	NA	NA	NA	NA	NA	NA	01.03.2019	EDM
Landguard Formation	1211	97	14	EXT	Landguard_97_#14E_Col_6_b	6	34	422	190	NA	NA	NA	NA	NA	NA	NA	NA	NA	NA	01.03.2019	EDM
Landguard Formation	1212	97	14	EXT	Landguard_97_#14E_Col_6_b	6	33	405	166	NA	NA	NA	NA	NA	NA	NA	NA	NA	NA	01.03.2019	EDM
Landguard Formation	1213	97	14	EXT	Landguard_97_#14E_Col_6_b	6	53	396	163	NA	NA	NA	NA	NA	NA	NA	NA	NA	NA	01.03.2019	EDM
Landguard Formation	1214	97	14	EXT	Landguard_97_#14E_Col_6_b	6	54	384	175	NA	NA	NA	NA	NA	NA	NA	NA	NA	NA	01.03.2019	EDM
Landguard Formation	1215	97	14	EXT	Landguard_97_#14E_Col_13_a	13	4	NA	NA	NA	NA	183	204	NA	NA	NA	NA	NA	NA	01.03.2019	EDM
Landguard Formation	1216	97	14	EXT	Landguard_97_#14E_Col_13_a	13	5	NA	NA	NA	NA	162	182	NA	NA	NA	NA	NA	NA	01.03.2019	EDM
Landguard Formation	1217	97	14	EXT	Landguard_97_#14E_Col_13_a	13	6	NA	NA	NA	NA	197	181	NA	NA	NA	NA	NA	NA	01.03.2019	EDM
Landguard Formation	1218	97	14	EXT	Landguard_97_#14E_Col_13_a	13	10	NA	NA	NA	NA	154	201	NA	NA	NA	NA	NA	NA	01.03.2019	EDM
Landguard Formation	1219	97	14	EXT	Landguard_97_#14E_Col_13_a	13	8	NA	NA	NA	NA	138	195	39	71	NA	NA	NA	NA	01.03.2019	EDM
Landguard Formation	1220	97	14	EXT	Landguard_97_#14E_Col_13_a	13	9	NA	NA	NA	NA	167	194	42	67	NA	NA	NA	NA	01.03.2019	EDM
Landguard Formation	1221	97	14	EXT	Landguard_97_#14E_Col_13_a	13	30	386	176	NA	NA	NA	NA	NA	NA	NA	NA	NA	NA	01.03.2019	EDM
Landguard Formation	1222	97	14	EXT	Landguard_97_#14E_Col_13_a	13	45	382	161	NA	NA	NA	NA	NA	NA	NA	NA	NA	NA	01.03.2019	EDM
Landguard Formation	1223	97	14	EXT	Landguard_97_#14E_Col_13_a	13	64	412	195	NA	NA	NA	NA	NA	NA	NA	NA	NA	NA	01.03.2019	EDM
Landguard Formation	1224	97	14	EXT	Landguard_97_#14E_Col_13_a	13	42	363	171	NA	NA	NA	NA	NA	NA	NA	NA	NA	NA	01.03.2019	EDM
Landguard Formation	1225	97	14	EXT	Landguard_97_#14E_Col_13_a	13	66	476	159	NA	NA	NA	NA	NA	NA	NA	NA	NA	NA	01.03.2019	EDM
Landguard Formation	1226	97	14	EXT	Landguard_97_#14E_Col_13_a	13	21	NA	NA	NA	NA	NA	NA	NA	NA	282	158	NA	NA	01.03.2019	EDM
Landguard Formation	1227	97	14	EXT	Landguard_97_#14E_Col_20_a	20	3	NA	NA	NA	NA	159	227	NA	NA	NA	NA	NA	NA	01.03.2019	EDM
Landguard Formation	1228	97	14	EXT	Landguard_97_#14E_Col_20_a	20	2	NA	NA	NA	NA	159	204	NA	NA	NA	NA	NA	NA	01.03.2019	EDM
Landguard Formation	1229	97	14	EXT	Landguard_97_#14E_Col_20_a	20	5	NA	NA	NA	NA	153	220	NA	NA	NA	NA	NA	NA	01.03.2019	EDM
Landguard Formation	1230	97	14	EXT	Landguard_97_#14E_Col_20_a	20	4	NA	NA	NA	NA	159	225	NA	NA	NA	NA	NA	NA	01.03.2019	EDM
Landguard Formation	1231	97	14	EXT	Landguard_97_#14E_Col_20_a	20	6	NA	NA	NA	NA	155	208	NA	NA	NA	NA	NA	NA	01.03.2019	EDM
Landguard Formation	1232	97	14	EXT	Landguard_97_#14E_Col_20_a	20	8	NA	NA	NA	NA	172	203	NA	NA	NA	NA	NA	NA	01.03.2019	EDM
Landguard Formation	1233	97	14	EXT	Landguard_97_#14E_Col_20_a	20	7	NA	NA	NA	NA	159	232	NA	NA	NA	NA	NA	NA	01.03.2019	EDM
Landguard Formation	1234	97	14	EXT	Landguard_97_#14E_Col_20_a	20	32	493	197	NA	NA	NA	NA	NA	NA	NA	NA	NA	NA	01.03.2019	EDM
Landguard Formation	1235	97	14	EXT	Landguard_97_#14E_Col_20_a	20	31	496	183	NA	NA	NA	NA	NA	NA	NA	NA	NA	NA	01.03.2019	EDM
Landguard Formation	1236	97	14	EXT	Landguard_97_#14E_Col_20_a	20	28	375	176	NA	NA	NA	NA	NA	NA	NA	NA	NA	NA	01.03.2019	EDM
Landguard Formation	1237	97	14	EXT	Landguard_97_#14E_Col_20_a	20	48	497	159	NA	NA	NA	NA	NA	NA	NA	NA	NA	NA	01.03.2019	EDM
Landguard Formation	1238	97	14	EXT	Landguard_97_#14E_Col_20_a	20	44	503	169	NA	NA	NA	NA	NA	NA	NA	NA	NA	NA	01.03.2019	EDM
Landguard Formation	1239	97	18	INT	Landguard_97_#18I_Col_1_a	1	3	NA	NA	NA	NA	163	212	NA	NA	NA	NA	NA	NA	01.03.2019	EDM
Landguard Formation	1240	97	18	INT	Landguard_97_#18I_Col_1_a	1	7	NA	NA	NA	NA	174	213	NA	NA	NA	NA	NA	NA	01.03.2019	EDM
Landguard Formation	1241	97	18	INT	Landguard_97_#18I_Col_1_a	1	1	NA	NA	NA	NA	166	217	NA	NA	NA	NA	NA	NA	01.03.2019	EDM
Landguard Formation	1242	97	19	INT	Landguard_97_#19I_Col_1_a	1	10	NA	NA	NA	NA	129	202	NA	NA	NA	NA	NA	NA	01.03.2019	EDM
Landguard Formation	1243	97	19	INT	Landguard_97_#19I_Col_1_a	1	1	NA	NA	NA	NA	152	199	NA	NA	NA	NA	NA	NA	01.03.2019	EDM
Landguard Formation	1244	97	19	INT	Landguard_97_#19I_Col_1_a	1	8	NA	NA	NA	NA	150	211	NA	NA	NA	NA	NA	NA	01.03.2019	EDM
Landguard Formation	1245	97	19	INT	Landguard_97_#19I_Col_1_a	1	7	NA	NA	NA	NA	151	188	NA	NA	NA	NA	NA	NA	01.03.2019	EDM
Landguard Formation	1246	97	19	INT	Landguard_97_#19I_Col_1_a	1	6	NA	NA	NA	NA	163	201	NA	NA	NA	NA	NA	NA	01.03.2019	EDM
Landguard Formation	1247	97	19	INT	Landguard_97_#19I_Col_1_a	1	4	NA	NA	NA	NA	147	200	NA	NA	NA	NA	NA	NA	01.03.2019	EDM
Landguard Formation	1248	97	19	INT	Landguard_97_#19I_Col_1_a	1	3	NA	NA	NA	NA	145	200	NA	NA	NA	NA	NA	NA	01.03.2019	EDM
Landguard Formation	1249	97	19	INT	Landguard_97_#19I_Col_1_a	1	2	NA	NA	NA	NA	138	209	NA	NA	NA	NA	NA	NA	01.03.2019	EDM
Landguard Formation	1250	97	19	INT	Landguard_97_#19I_Col_1_a	1	34	346	172	NA	NA	NA	NA	NA	NA	NA	NA	NA	NA	01.03.2019	EDM
Landguard Formation	1251	97	19	INT	Landguard_97_#19I_Col_1_a	1	11	NA	NA	NA	NA	NA	NA	NA	NA	219	193	NA	NA	01.03.2019	EDM
Landguard Formation	1252	97	19	INT	Landguard_97_#19I_Col_1_a	1	33	334	182	NA	NA	NA	NA	NA	NA	NA	NA	NA	NA	01.03.2019	EDM
Landguard Formation	1253	97	19	INT	Landguard_97_#19I_Col_1_a	1	37	422	209	NA	NA	NA	NA	NA	NA	NA	NA	NA	NA	01.03.2019	EDM
Landguard Formation	1254	97	19	INT	Landguard_97_#19I_Col_1_a	1	28	367	179	NA	NA	NA	NA	NA	NA	NA	NA	NA	NA	01.03.2019	EDM
Landguard Formation	1255	97	19	INT	Landguard_97_#19I_Col_1_a	1	39	495	217	NA	NA	NA	NA	NA	NA	NA	NA	NA	NA	01.03.2019	EDM
Landguard Formation	1256	97	19	INT	Landguard_97_#19I_Col_1_a	1	12	NA	NA	NA	NA	NA	NA	NA	NA	265	162	NA	NA	01.03.2019	EDM
Landguard Formation	1257	97	19	INT	Landguard_97_#19I_Col_1_a	1	20	NA	NA	NA	NA	NA	NA	NA	NA	322	145	NA	NA	01.03.2019	EDM
Landguard Formation	1258	97	19	INT	Landguard_97_#19I_Col_1_a	1	21	NA	NA	NA	NA	NA	NA	NA	NA	263	155	NA	NA	01.03.2019	EDM
Landguard Formation	1259	97	19	INT	Landguard_97_#19I_Col_1_a	1	22	NA	NA	NA	NA	NA	NA	NA	NA	245	155	NA	NA	01.03.2019	EDM
Landguard Formation	1260	97	20	INT	Landguard_97_#20I_Col_1_a	1	3	NA	NA	NA	NA	190	198	NA	NA	NA	NA	NA	NA	01.03.2019	EDM
Landguard Formation	1261	97	20	INT	Landguard_97_#20I_Col_1_a	1	45	444	199	NA	NA	NA	NA	NA	NA	NA	NA	NA	NA	01.03.2019	EDM
Landguard Formation	1262	97	20	INT	Landguard_97_#20I_Col_1_a	1	37	439	202	NA	NA	NA	NA	NA	NA	NA	NA	NA	NA	01.03.2019	EDM
Landguard Formation	1263	97	20	INT	Landguard_97_#20I_Col_1_a	1	41	514	202	NA	NA	NA	NA	NA	NA	NA	NA	NA	NA	01.03.2019	EDM
Landguard Formation	1264	97	20	INT	Landguard_97_#20I_Col_1_a	1	30	522	230	77	67	NA	NA	NA	NA	NA	NA	NA	NA	01.03.2019	EDM
Landguard Formation	1265	97	20	INT	Landguard_97_#20I_Col_1_a	1	29	557	203	NA	NA	NA	NA	NA	NA	NA	NA	NA	NA	01.03.2019	EDM
Landguard Formation	1266	97	20	INT	Landguard_97_#20I_Col_1_a	1	1	NA	NA	NA	NA	176	212	NA	NA	NA	NA	NA	NA	01.03.2019	EDM
Landguard Formation	1267	97	20	INT	Landguard_97_#20I_Col_1_a	1	5	NA	NA	NA	NA	182	213	NA	NA	NA	NA	NA	NA	01.03.2019	EDM
Landguard Formation	1268	97	20	INT	Landguard_97_#20I_Col_1_a	1	9	NA	NA	NA	NA	NA	NA	NA	NA	390	160	NA	NA	01.03.2019	EDM
Landguard Formation	1269	97	20	INT	Landguard_97_#20I_Col_1_a	1	10	NA	NA	NA	NA	NA	NA	NA	NA	385	160	32	32	01.03.2019	EDM
Landguard Formation	1270	97	23	INT	Landguard_97_#23I_Col_1_a	1	2	NA	NA	NA	NA	150	217	NA	NA	NA	NA	NA	NA	01.03.2019	EDM
Landguard Formation	1271	97	23	INT	Landguard_97_#23I_Col_1_a	1	1	NA	NA	NA	NA	153	211	NA	NA	NA	NA	NA	NA	01.03.2019	EDM
Landguard Formation	1272	97	23	INT	Landguard_97_#23I_Col_1_a	1	6	NA	NA	NA	NA	166	195	NA	NA	NA	NA	NA	NA	01.03.2019	EDM
Landguard Formation	1273	97	23	INT	Landguard_97_#23I_Col_1_a	1	3	NA	NA	NA	NA	159	191	NA	NA	NA	NA	NA	NA	01.03.2019	EDM
Landguard Formation	1274	97	23	INT	Landguard_97_#23I_Col_1_a	1	34	425	160	NA	NA	NA	NA	NA	NA	NA	NA	NA	NA	01.03.2019	EDM
Landguard Formation	1275	97	23	INT	Landguard_97_#23I_Col_1_a	1	71	404	215	NA	NA	NA	NA	NA	NA	NA	NA	NA	NA	01.03.2019	EDM
Landguard Formation	1276	97	23	INT	Landguard_97_#23I_Col_1_a	1	33	469	195	NA	NA	NA	NA	NA	NA	NA	NA	NA	NA	01.03.2019	EDM
Landguard Formation	1277	97	23	INT	Landguard_97_#23I_Col_1_a	1	43	342	195	NA	NA	NA	NA	NA	NA	NA	NA	NA	NA	01.03.2019	EDM
Landguard Formation	1278	97	23	INT	Landguard_97_#23I_Col_1_a	1	69	495	207	NA	NA	NA	NA	NA	NA	NA	NA	NA	NA	01.03.2019	EDM
Landguard Formation	1279	97	23	INT	Landguard_97_#23I_Col_1_a	1	21	NA	NA	NA	NA	NA	NA	NA	NA	261	152	NA	NA	01.03.2019	EDM
Landguard Formation	1280	97	23	INT	Landguard_97_#23I_Col_1_a	1	19	NA	NA	NA	NA	NA	NA	NA	NA	258	149	NA	NA	01.03.2019	EDM
Landguard Formation	1281	97	23	INT	Landguard_97_#23I_Col_1_a	1	18	NA	NA	NA	NA	NA	NA	NA	NA	273	145	NA	NA	01.03.2019	EDM
Landguard Formation	1282	97	24	INT	Landguard_97_#24I_Col_1_a	1	35	394	196	NA	NA	NA	NA	NA	NA	NA	NA	NA	NA	04.03.2019	EDM
Landguard Formation	1283	97	24	INT	Landguard_97_#24I_Col_1_a	1	36	449	181	NA	NA	NA	NA	NA	NA	NA	NA	NA	NA	04.03.2019	EDM
Landguard Formation	1284	97	24	INT	Landguard_97_#24I_Col_1_a	1	38	435	188	NA	NA	NA	NA	NA	NA	NA	NA	NA	NA	04.03.2019	EDM
Landguard Formation	1285	97	24	INT	Landguard_97_#24I_Col_1_a	1	63	387	204	NA	NA	NA	NA	NA	NA	NA	NA	NA	NA	04.03.2019	EDM
Landguard Formation	1286	97	24	INT	Landguard_97_#24I_Col_1_a	1	64	386	188	NA	NA	NA	NA	NA	NA	NA	NA	NA	NA	04.03.2019	EDM
Landguard Formation	1287	97	24	INT	Landguard_97_#24I_Col_1_a	1	3	NA	NA	NA	NA	NA	NA	NA	NA	197	180	NA	NA	04.03.2019	EDM
Landguard Formation	1288	97	24	INT	Landguard_97_#24I_Col_1_a	1	2	NA	NA	NA	NA	NA	NA	NA	NA	246	151	NA	NA	04.03.2019	EDM
Landguard Formation	1289	97	24	INT	Landguard_97_#24I_Col_2_a	2	49	387	196	NA	NA	NA	NA	NA	NA	NA	NA	NA	NA	04.03.2019	EDM
Landguard Formation	1290	97	24	INT	Landguard_97_#24I_Col_2_a	2	13	430	160	NA	NA	NA	NA	NA	NA	NA	NA	NA	NA	04.03.2019	EDM
Landguard Formation	1291	97	24	INT	Landguard_97_#24I_Col_2_a	2	37	389	197	NA	NA	NA	NA	NA	NA	NA	NA	NA	NA	04.03.2019	EDM
Landguard Formation	1292	97	24	INT	Landguard_97_#24I_Col_2_a	2	48	410	200	NA	NA	NA	NA	NA	NA	NA	NA	NA	NA	04.03.2019	EDM
Landguard Formation	1293	97	24	INT	Landguard_97_#24I_Col_2_a	2	51	453	202	NA	NA	NA	NA	NA	NA	NA	NA	NA	NA	04.03.2019	EDM
Landguard Formation	1294	97	24	INT	Landguard_97_#24I_Col_2_a	2	6	NA	NA	NA	NA	NA	NA	NA	NA	271	122	NA	NA	04.03.2019	EDM
Landguard Formation	1295	97	24	INT	Landguard_97_#24I_Col_2_a	2	8	NA	NA	NA	NA	NA	NA	NA	NA	220	153	NA	NA	04.03.2019	EDM
Landguard Formation	1296	97	24	INT	Landguard_97_#24I_Col_2_a	2	5	NA	NA	NA	NA	NA	NA	NA	NA	223	165	NA	NA	04.03.2019	EDM
Landguard Formation	1297	97	24	INT	Landguard_97_#24I_Col_2_a	2	2	NA	NA	NA	NA	NA	NA	NA	NA	205	181	NA	NA	04.03.2019	EDM
Landguard Formation	1298	98	2	INT	Landguard_98_#2I_Col_1_a	1	5	NA	NA	NA	NA	155	196	NA	NA	NA	NA	NA	NA	04.03.2019	EDM
Landguard Formation	1299	98	2	INT	Landguard_98_#2I_Col_1_a	1	1	NA	NA	NA	NA	149	198	NA	NA	NA	NA	NA	NA	04.03.2019	EDM
Landguard Formation	1300	98	2	INT	Landguard_98_#2I_Col_1_a	1	3	NA	NA	NA	NA	160	194	NA	NA	NA	NA	NA	NA	04.03.2019	EDM
Landguard Formation	1301	98	2	INT	Landguard_98_#2I_Col_1_a	1	4	NA	NA	NA	NA	157	198	NA	NA	NA	NA	NA	NA	04.03.2019	EDM
Landguard Formation	1302	98	2	INT	Landguard_98_#2I_Col_1_a	1	2	NA	NA	NA	NA	141	208	NA	NA	NA	NA	NA	NA	04.03.2019	EDM
Landguard Formation	1303	98	2	INT	Landguard_98_#2I_Col_1_a	1	10	NA	NA	NA	NA	186	194	NA	NA	NA	NA	NA	NA	04.03.2019	EDM
Landguard Formation	1304	98	2	INT	Landguard_98_#2I_Col_1_a	1	12	NA	NA	NA	NA	143	206	NA	NA	NA	NA	NA	NA	04.03.2019	EDM
Landguard Formation	1305	98	2	INT	Landguard_98_#2I_Col_1_a	1	7	NA	NA	NA	NA	155	206	NA	NA	NA	NA	NA	NA	04.03.2019	EDM
Landguard Formation	1306	98	2	INT	Landguard_98_#2I_Col_1_a	1	28	440	182	NA	NA	NA	NA	NA	NA	NA	NA	NA	NA	04.03.2019	EDM
Landguard Formation	1307	98	2	INT	Landguard_98_#2I_Col_1_a	1	36	387	198	NA	NA	NA	NA	NA	NA	NA	NA	NA	NA	04.03.2019	EDM
Landguard Formation	1308	98	2	INT	Landguard_98_#2I_Col_1_a	1	22	472	159	NA	NA	NA	NA	NA	NA	NA	NA	NA	NA	04.03.2019	EDM
Landguard Formation	1309	98	2	INT	Landguard_98_#2I_Col_1_a	1	35	428	167	NA	NA	NA	NA	NA	NA	NA	NA	NA	NA	04.03.2019	EDM
Landguard Formation	1310	98	2	INT	Landguard_98_#2I_Col_1_a	1	25	398	182	NA	NA	NA	NA	NA	NA	NA	NA	NA	NA	04.03.2019	EDM
Landguard Formation	1311	98	2	INT	Landguard_98_#2I_Col_1_a	1	15	NA	NA	NA	NA	NA	NA	NA	NA	286	129	NA	NA	04.03.2019	EDM
Landguard Formation	1312	98	11	INT	Landguard_98_#11I_Col_1_a	1	1	NA	NA	NA	NA	149	213	NA	NA	NA	NA	NA	NA	04.03.2019	EDM
Landguard Formation	1313	98	11	INT	Landguard_98_#11I_Col_1_a	1	2	NA	NA	NA	NA	150	180	NA	NA	NA	NA	NA	NA	04.03.2019	EDM
Landguard Formation	1314	98	11	INT	Landguard_98_#11I_Col_2_a	2	5	NA	NA	NA	NA	155	194	NA	NA	NA	NA	NA	NA	04.03.2019	EDM
Landguard Formation	1315	98	11	INT	Landguard_98_#11I_Col_2_a	2	4	NA	NA	NA	NA	172	189	NA	NA	NA	NA	NA	NA	04.03.2019	EDM
Landguard Formation	1316	98	11	INT	Landguard_98_#11I_Col_2_a	2	2	NA	NA	NA	NA	162	206	NA	NA	NA	NA	NA	NA	04.03.2019	EDM
Landguard Formation	1317	98	11	INT	Landguard_98_#11I_Col_2_a	2	18	NA	NA	NA	NA	164	179	NA	NA	NA	NA	NA	NA	04.03.2019	EDM
Landguard Formation	1318	98	11	INT	Landguard_98_#11I_Col_2_a	2	13	NA	NA	NA	NA	143	201	NA	NA	NA	NA	NA	NA	04.03.2019	EDM
Landguard Formation	1319	98	11	INT	Landguard_98_#11I_Col_2_a	2	24	467	179	NA	NA	NA	NA	NA	NA	NA	NA	NA	NA	04.03.2019	EDM
Landguard Formation	1320	98	11	INT	Landguard_98_#11I_Col_2_a	2	45	507	163	NA	NA	NA	NA	NA	NA	NA	NA	NA	NA	04.03.2019	EDM
Landguard Formation	1321	98	11	INT	Landguard_98_#11I_Col_2_a	2	22	346	194	NA	NA	NA	NA	NA	NA	NA	NA	NA	NA	04.03.2019	EDM
Landguard Formation	1322	98	11	INT	Landguard_98_#11I_Col_2_a	2	19	368	171	NA	NA	NA	NA	NA	NA	NA	NA	NA	NA	04.03.2019	EDM
Landguard Formation	1323	98	11	INT	Landguard_98_#11I_Col_2_a	2	34	337	190	NA	NA	NA	NA	NA	NA	NA	NA	NA	NA	04.03.2019	EDM
Landguard Formation	1324	98	11	INT	Landguard_98_#11I_Col_2_b	2	5	NA	NA	NA	NA	162	217	NA	NA	NA	NA	NA	NA	04.03.2019	EDM
Landguard Formation	1325	98	11	INT	Landguard_98_#11I_Col_2_b	2	1	NA	NA	NA	NA	159	201	NA	NA	NA	NA	NA	NA	04.03.2019	EDM
Landguard Formation	1326	98	11	INT	Landguard_98_#11I_Col_2_b	2	3	NA	NA	NA	NA	163	210	NA	NA	NA	NA	NA	NA	04.03.2019	EDM
Landguard Formation	1327	98	11	INT	Landguard_98_#11I_Col_2_b	2	4	NA	NA	NA	NA	151	212	NA	NA	NA	NA	NA	NA	04.03.2019	EDM
Landguard Formation	1328	98	11	INT	Landguard_98_#11I_Col_2_b	2	25	NA	NA	NA	NA	158	206	NA	NA	NA	NA	NA	NA	04.03.2019	EDM
Landguard Formation	1329	98	11	INT	Landguard_98_#11I_Col_2_b	2	16	NA	NA	83	63	NA	NA	NA	NA	NA	NA	NA	NA	04.03.2019	EDM
Landguard Formation	1330	98	19	INT	Landguard_98_#19I_Col_2_a	2	1	NA	NA	NA	NA	172	198	NA	NA	NA	NA	NA	NA	04.03.2019	EDM
Landguard Formation	1331	98	19	INT	Landguard_98_#19I_Col_2_a	2	25	395	188	NA	NA	NA	NA	NA	NA	NA	NA	NA	NA	04.03.2019	EDM
Landguard Formation	1332	98	19	INT	Landguard_98_#19I_Col_2_a	2	24	387	219	NA	NA	NA	NA	NA	NA	NA	NA	NA	NA	04.03.2019	EDM
Landguard Formation	1333	98	19	INT	Landguard_98_#19I_Col_2_a	2	15	361	204	NA	NA	NA	NA	NA	NA	NA	NA	NA	NA	04.03.2019	EDM
Landguard Formation	1334	98	19	INT	Landguard_98_#19I_Col_2_a	2	11	373	179	NA	NA	NA	NA	NA	NA	NA	NA	NA	NA	04.03.2019	EDM
Landguard Formation	1335	98	19	INT	Landguard_98_#19I_Col_2_a	2	8	349	192	NA	NA	NA	NA	NA	NA	NA	NA	NA	NA	04.03.2019	EDM
Lower Kai-iwi Shellbed	1336	60	8	EXT	Lower_Kai_iwi_60_#8E_Col_1_a	1	3	NA	NA	NA	NA	189	267	NA	NA	NA	NA	NA	NA	18.03.2019	EDM
Lower Kai-iwi Shellbed	1337	60	8	EXT	Lower_Kai_iwi_60_#8E_Col_1_a	1	1	NA	NA	NA	NA	175	252	NA	NA	NA	NA	NA	NA	18.03.2019	EDM
Lower Kai-iwi Shellbed	1338	60	8	EXT	Lower_Kai_iwi_60_#8E_Col_1_a	1	2	NA	NA	NA	NA	173	252	NA	NA	NA	NA	NA	NA	18.03.2019	EDM
Lower Kai-iwi Shellbed	1339	60	8	EXT	Lower_Kai_iwi_60_#8E_Col_1_a	1	21	521	240	NA	NA	NA	NA	NA	NA	NA	NA	NA	NA	18.03.2019	EDM
Lower Kai-iwi Shellbed	1340	60	8	EXT	Lower_Kai_iwi_60_#8E_Col_1_a	1	36	465	257	NA	NA	NA	NA	NA	NA	NA	NA	NA	NA	18.03.2019	EDM
Lower Kai-iwi Shellbed	1341	60	8	EXT	Lower_Kai_iwi_60_#8E_Col_1_a	1	31	434	267	NA	NA	NA	NA	NA	NA	NA	NA	NA	NA	18.03.2019	EDM
Lower Kai-iwi Shellbed	1342	60	8	EXT	Lower_Kai_iwi_60_#8E_Col_1_a	1	37	418	235	NA	NA	NA	NA	NA	NA	NA	NA	NA	NA	18.03.2019	EDM
Lower Kai-iwi Shellbed	1343	60	8	EXT	Lower_Kai_iwi_60_#8E_Col_1_a	1	35	457	229	NA	NA	NA	NA	NA	NA	NA	NA	NA	NA	18.03.2019	EDM
Lower Kai-iwi Shellbed	1344	60	8	EXT	Lower_Kai_iwi_60_#8E_Col_1_a	1	32	444	205	NA	NA	NA	NA	NA	NA	NA	NA	NA	NA	18.03.2019	EDM
Lower Kai-iwi Shellbed	1345	60	8	EXT	Lower_Kai_iwi_60_#8E_Col_1_a	1	11	NA	NA	NA	NA	NA	NA	NA	NA	321	195	NA	NA	18.03.2019	EDM
Lower Kai-iwi Shellbed	1346	60	8	EXT	Lower_Kai_iwi_60_#8E_Col_1_a	1	12	NA	NA	NA	NA	NA	NA	NA	NA	297	195	NA	NA	18.03.2019	EDM
Lower Kai-iwi Shellbed	1347	60	8	EXT	Lower_Kai_iwi_60_#8E_Col_1_a	1	16	NA	NA	NA	NA	NA	NA	NA	NA	323	167	NA	NA	18.03.2019	EDM
Lower Kai-iwi Shellbed	1348	60	8	EXT	Lower_Kai_iwi_60_#8E_Col_1_a	1	13	NA	NA	NA	NA	NA	NA	NA	NA	358	249	NA	NA	18.03.2019	EDM
Lower Kai-iwi Shellbed	1349	60	8	EXT	Lower_Kai_iwi_60_#8E_Col_1_a	1	18	NA	NA	NA	NA	NA	NA	NA	NA	319	215	NA	NA	18.03.2019	EDM
Lower Kai-iwi Shellbed	1350	60	8	EXT	Lower_Kai_iwi_60_#8E_Col_2_a	2	10	399	216	NA	NA	NA	NA	NA	NA	NA	NA	NA	NA	18.03.2019	EDM
Lower Kai-iwi Shellbed	1351	60	8	EXT	Lower_Kai_iwi_60_#8E_Col_2_a	2	16	414	207	NA	NA	NA	NA	NA	NA	NA	NA	NA	NA	18.03.2019	EDM
Lower Kai-iwi Shellbed	1352	60	8	EXT	Lower_Kai_iwi_60_#8E_Col_2_a	2	28	378	214	NA	NA	NA	NA	NA	NA	NA	NA	NA	NA	18.03.2019	EDM
Lower Kai-iwi Shellbed	1353	60	8	EXT	Lower_Kai_iwi_60_#8E_Col_2_a	2	26	484	240	NA	NA	NA	NA	NA	NA	NA	NA	NA	NA	18.03.2019	EDM
Lower Kai-iwi Shellbed	1354	60	8	EXT	Lower_Kai_iwi_60_#8E_Col_2_a	2	13	439	239	NA	NA	NA	NA	NA	NA	NA	NA	NA	NA	18.03.2019	EDM
Lower Kai-iwi Shellbed	1355	60	8	EXT	Lower_Kai_iwi_60_#8E_Col_2_a	2	12	441	222	NA	NA	NA	NA	NA	NA	NA	NA	NA	NA	18.03.2019	EDM
Lower Kai-iwi Shellbed	1356	60	8	EXT	Lower_Kai_iwi_60_#8E_Col_2_a	2	1	NA	NA	NA	NA	NA	NA	NA	NA	291	152	NA	NA	18.03.2019	EDM
Lower Kai-iwi Shellbed	1357	60	8	EXT	Lower_Kai_iwi_60_#8E_Col_2_a	2	2	NA	NA	NA	NA	NA	NA	NA	NA	348	196	NA	NA	18.03.2019	EDM
Lower Kai-iwi Shellbed	1358	60	12	EXT	Lower_Kai_iwi_60_#12E_Col_1_a	1	34	426	231	NA	NA	NA	NA	NA	NA	NA	NA	NA	NA	18.03.2019	EDM
Lower Kai-iwi Shellbed	1359	60	12	EXT	Lower_Kai_iwi_60_#12E_Col_1_a	1	36	501	285	NA	NA	NA	NA	NA	NA	NA	NA	NA	NA	18.03.2019	EDM
Lower Kai-iwi Shellbed	1360	60	12	EXT	Lower_Kai_iwi_60_#12E_Col_1_a	1	38	429	241	NA	NA	NA	NA	NA	NA	NA	NA	NA	NA	18.03.2019	EDM
Lower Kai-iwi Shellbed	1361	60	12	EXT	Lower_Kai_iwi_60_#12E_Col_1_a	1	37	472	306	NA	NA	NA	NA	NA	NA	NA	NA	NA	NA	18.03.2019	EDM
Lower Kai-iwi Shellbed	1362	60	12	EXT	Lower_Kai_iwi_60_#12E_Col_1_a	1	41	493	216	NA	NA	NA	NA	NA	NA	NA	NA	NA	NA	18.03.2019	EDM
Lower Kai-iwi Shellbed	1363	60	12	EXT	Lower_Kai_iwi_60_#12E_Col_1_a	1	5	NA	NA	NA	NA	NA	NA	NA	NA	351	211	NA	NA	18.03.2019	EDM
Lower Kai-iwi Shellbed	1364	60	12	EXT	Lower_Kai_iwi_60_#12E_Col_1_a	1	18	NA	NA	NA	NA	NA	NA	NA	NA	329	220	NA	NA	18.03.2019	EDM
Lower Kai-iwi Shellbed	1365	60	12	EXT	Lower_Kai_iwi_60_#12E_Col_1_a	1	21	NA	NA	NA	NA	NA	NA	NA	NA	339	197	NA	NA	18.03.2019	EDM
Lower Kai-iwi Shellbed	1366	60	12	EXT	Lower_Kai_iwi_60_#12E_Col_1_a	1	4	NA	NA	NA	NA	NA	NA	NA	NA	364	202	NA	NA	18.03.2019	EDM
Lower Kai-iwi Shellbed	1367	60	12	EXT	Lower_Kai_iwi_60_#12E_Col_1_a	1	1	NA	NA	NA	NA	161	278	NA	NA	NA	NA	NA	NA	18.03.2019	EDM
Lower Kai-iwi Shellbed	1368	60	12	EXT	Lower_Kai_iwi_60_#12E_Col_1_a	1	3	NA	NA	NA	NA	176	267	NA	NA	NA	NA	NA	NA	18.03.2019	EDM
Lower Kai-iwi Shellbed	1369	60	12	EXT	Lower_Kai_iwi_60_#12E_Col_2_a	2	35	481	304	NA	NA	NA	NA	NA	NA	NA	NA	NA	NA	18.03.2019	EDM
Lower Kai-iwi Shellbed	1370	60	12	EXT	Lower_Kai_iwi_60_#12E_Col_2_a	2	33	429	256	NA	NA	NA	NA	NA	NA	NA	NA	NA	NA	18.03.2019	EDM
Lower Kai-iwi Shellbed	1371	60	12	EXT	Lower_Kai_iwi_60_#12E_Col_2_a	2	32	474	236	NA	NA	NA	NA	NA	NA	NA	NA	NA	NA	18.03.2019	EDM
Lower Kai-iwi Shellbed	1372	60	12	EXT	Lower_Kai_iwi_60_#12E_Col_2_a	2	24	423	214	NA	NA	NA	NA	NA	NA	NA	NA	NA	NA	18.03.2019	EDM
Lower Kai-iwi Shellbed	1373	60	12	EXT	Lower_Kai_iwi_60_#12E_Col_2_a	2	22	526	285	NA	NA	NA	NA	NA	NA	NA	NA	NA	NA	18.03.2019	EDM
Lower Kai-iwi Shellbed	1374	60	12	EXT	Lower_Kai_iwi_60_#12E_Col_2_a	2	3	NA	NA	NA	NA	NA	NA	NA	NA	316	180	NA	NA	18.03.2019	EDM
Lower Kai-iwi Shellbed	1375	60	12	EXT	Lower_Kai_iwi_60_#12E_Col_2_a	2	15	NA	NA	NA	NA	NA	NA	NA	NA	265	204	NA	NA	18.03.2019	EDM
Lower Kai-iwi Shellbed	1376	60	12	EXT	Lower_Kai_iwi_60_#12E_Col_2_a	2	2	NA	NA	NA	NA	NA	NA	NA	NA	235	177	NA	NA	18.03.2019	EDM
Lower Kai-iwi Shellbed	1377	60	13	EXT	Lower_Kai_iwi_60_#13E_Col_1_a	1	28	468	220	NA	NA	NA	NA	NA	NA	NA	NA	NA	NA	18.03.2019	EDM
Lower Kai-iwi Shellbed	1378	60	13	EXT	Lower_Kai_iwi_60_#13E_Col_1_a	1	26	469	267	NA	NA	NA	NA	NA	NA	NA	NA	NA	NA	18.03.2019	EDM
Lower Kai-iwi Shellbed	1379	60	13	EXT	Lower_Kai_iwi_60_#13E_Col_1_a	1	21	462	247	NA	NA	NA	NA	NA	NA	NA	NA	NA	NA	18.03.2019	EDM
Lower Kai-iwi Shellbed	1380	60	13	EXT	Lower_Kai_iwi_60_#13E_Col_1_a	1	2	NA	NA	NA	NA	176	288	NA	NA	NA	NA	NA	NA	18.03.2019	EDM
Lower Kai-iwi Shellbed	1381	60	13	EXT	Lower_Kai_iwi_60_#13E_Col_1_a	1	15	NA	NA	NA	NA	NA	NA	NA	NA	218	174	NA	NA	18.03.2019	EDM
Lower Kai-iwi Shellbed	1382	60	13	EXT	Lower_Kai_iwi_60_#13E_Col_1_a	1	19	NA	NA	NA	NA	NA	NA	NA	NA	320	228	NA	NA	18.03.2019	EDM
Lower Kai-iwi Shellbed	1383	60	13	EXT	Lower_Kai_iwi_60_#13E_Col_1_a	1	14	NA	NA	NA	NA	NA	NA	NA	NA	303	197	NA	NA	18.03.2019	EDM
Lower Kai-iwi Shellbed	1384	60	19	EXT	Lower_Kai_iwi_60_#19E_Col_1	1	1	NA	NA	NA	NA	183	271	NA	NA	NA	NA	NA	NA	18.03.2019	EDM
Lower Kai-iwi Shellbed	1385	60	19	EXT	Lower_Kai_iwi_60_#19E_Col_1	1	2	NA	NA	NA	NA	180	265	NA	NA	NA	NA	NA	NA	18.03.2019	EDM
Lower Kai-iwi Shellbed	1386	60	19	EXT	Lower_Kai_iwi_60_#19E_Col_1	1	14	NA	NA	NA	NA	NA	NA	NA	NA	270	226	NA	NA	18.03.2019	EDM
Lower Kai-iwi Shellbed	1387	60	19	EXT	Lower_Kai_iwi_60_#19E_Col_1	1	15	NA	NA	NA	NA	NA	NA	NA	NA	275	191	NA	NA	18.03.2019	EDM
Lower Kai-iwi Shellbed	1388	60	19	EXT	Lower_Kai_iwi_60_#19E_Col_1	1	11	NA	NA	NA	NA	NA	NA	NA	NA	269	210	NA	NA	18.03.2019	EDM
Lower Kai-iwi Shellbed	1389	60	19	EXT	Lower_Kai_iwi_60_#19E_Col_1	1	13	NA	NA	NA	NA	NA	NA	NA	NA	313	211	NA	NA	18.03.2019	EDM
Lower Kai-iwi Shellbed	1390	60	19	EXT	Lower_Kai_iwi_60_#19E_Col_1	1	8	NA	NA	NA	NA	NA	NA	NA	NA	252	189	NA	NA	18.03.2019	EDM
Lower Kai-iwi Shellbed	1391	60	19	EXT	Lower_Kai_iwi_60_#19E_Col_1	1	9	NA	NA	NA	NA	NA	NA	NA	NA	243	220	NA	NA	18.03.2019	EDM
Lower Kai-iwi Shellbed	1392	60	19	EXT	Lower_Kai_iwi_60_#19E_Col_1	1	31	464	234	NA	NA	NA	NA	NA	NA	NA	NA	NA	NA	18.03.2019	EDM
Lower Kai-iwi Shellbed	1393	60	19	EXT	Lower_Kai_iwi_60_#19E_Col_1	1	32	447	245	NA	NA	NA	NA	NA	NA	NA	NA	NA	NA	18.03.2019	EDM
Lower Kai-iwi Shellbed	1394	60	19	EXT	Lower_Kai_iwi_60_#19E_Col_1	1	34	458	236	NA	NA	NA	NA	NA	NA	NA	NA	NA	NA	18.03.2019	EDM
Lower Kai-iwi Shellbed	1395	60	19	EXT	Lower_Kai_iwi_60_#19E_Col_1	1	38	516	275	NA	NA	NA	NA	NA	NA	NA	NA	NA	NA	18.03.2019	EDM
Lower Kai-iwi Shellbed	1396	61	26	EXT	Lower_Kai_iwi_61_#26E_Col_1	1	1	NA	NA	NA	NA	171	245	NA	NA	NA	NA	NA	NA	18.03.2019	EDM
Lower Kai-iwi Shellbed	1397	61	26	EXT	Lower_Kai_iwi_61_#26E_Col_1	1	30	443	256	NA	NA	NA	NA	NA	NA	NA	NA	NA	NA	18.03.2019	EDM
Lower Kai-iwi Shellbed	1398	61	26	EXT	Lower_Kai_iwi_61_#26E_Col_1	1	37	445	242	NA	NA	NA	NA	NA	NA	NA	NA	NA	NA	18.03.2019	EDM
Lower Kai-iwi Shellbed	1399	61	26	EXT	Lower_Kai_iwi_61_#26E_Col_1	1	26	449	208	NA	NA	NA	NA	NA	NA	NA	NA	NA	NA	18.03.2019	EDM
Lower Kai-iwi Shellbed	1400	61	26	EXT	Lower_Kai_iwi_61_#26E_Col_2_a	2	1	NA	NA	NA	NA	185	277	NA	NA	NA	NA	NA	NA	18.03.2019	EDM
Lower Kai-iwi Shellbed	1401	62	7	EXT	Lower_Kai_iwi_62_#7E_Col_1_a	1	41	439	258	NA	NA	NA	NA	NA	NA	NA	NA	NA	NA	18.03.2019	EDM
Lower Kai-iwi Shellbed	1402	62	7	EXT	Lower_Kai_iwi_62_#7E_Col_1_a	1	31	450	194	NA	NA	NA	NA	NA	NA	NA	NA	NA	NA	18.03.2019	EDM
Lower Kai-iwi Shellbed	1403	62	7	EXT	Lower_Kai_iwi_62_#7E_Col_1_a	1	34	472	211	NA	NA	NA	NA	NA	NA	NA	NA	NA	NA	18.03.2019	EDM
Lower Kai-iwi Shellbed	1404	62	7	EXT	Lower_Kai_iwi_62_#7E_Col_1_a	1	39	553	208	NA	NA	NA	NA	NA	NA	NA	NA	NA	NA	18.03.2019	EDM
Lower Kai-iwi Shellbed	1405	62	7	EXT	Lower_Kai_iwi_62_#7E_Col_1_a	1	18	442	229	NA	NA	NA	NA	NA	NA	NA	NA	NA	NA	18.03.2019	EDM
Lower Kai-iwi Shellbed	1406	62	7	EXT	Lower_Kai_iwi_62_#7E_Col_1_a	1	26	483	264	NA	NA	NA	NA	NA	NA	NA	NA	NA	NA	18.03.2019	EDM
Lower Kai-iwi Shellbed	1407	62	7	EXT	Lower_Kai_iwi_62_#7E_Col_1_a	1	27	428	223	NA	NA	NA	NA	NA	NA	NA	NA	NA	NA	18.03.2019	EDM
Lower Kai-iwi Shellbed	1408	62	7	EXT	Lower_Kai_iwi_62_#7E_Col_1_a	1	29	523	229	NA	NA	NA	NA	NA	NA	NA	NA	NA	NA	18.03.2019	EDM
Lower Kai-iwi Shellbed	1409	62	7	EXT	Lower_Kai_iwi_62_#7E_Col_1_a	1	12	NA	NA	NA	NA	NA	NA	NA	NA	295	205	NA	NA	18.03.2019	EDM
Lower Kai-iwi Shellbed	1410	62	7	EXT	Lower_Kai_iwi_62_#7E_Col_1_a	1	9	NA	NA	NA	NA	NA	NA	NA	NA	263	184	NA	NA	18.03.2019	EDM
Lower Kai-iwi Shellbed	1411	62	7	EXT	Lower_Kai_iwi_62_#7E_Col_1_a	1	10	NA	NA	NA	NA	NA	NA	NA	NA	257	188	NA	NA	18.03.2019	EDM
Lower Kai-iwi Shellbed	1412	62	7	EXT	Lower_Kai_iwi_62_#7E_Col_1_a	1	11	NA	NA	NA	NA	NA	NA	NA	NA	244	176	NA	NA	18.03.2019	EDM
Lower Kai-iwi Shellbed	1413	62	7	EXT	Lower_Kai_iwi_62_#7E_Col_1_a	1	14	NA	NA	NA	NA	NA	NA	NA	NA	288	224	NA	NA	18.03.2019	EDM
Lower Kai-iwi Shellbed	1414	62	10	EXT	Lower_Kai_iwi_62_#10E_Col_1_a	1	43	496	252	NA	NA	NA	NA	NA	NA	NA	NA	NA	NA	18.03.2019	EDM
Lower Kai-iwi Shellbed	1415	62	10	EXT	Lower_Kai_iwi_62_#10E_Col_1_a	1	30	527	220	NA	NA	NA	NA	NA	NA	NA	NA	NA	NA	18.03.2019	EDM
Lower Kai-iwi Shellbed	1416	62	10	EXT	Lower_Kai_iwi_62_#10E_Col_1_a	1	27	448	240	NA	NA	NA	NA	NA	NA	NA	NA	NA	NA	18.03.2019	EDM
Lower Kai-iwi Shellbed	1417	62	10	EXT	Lower_Kai_iwi_62_#10E_Col_1_a	1	23	497	247	NA	NA	NA	NA	NA	NA	NA	NA	NA	NA	18.03.2019	EDM
Lower Kai-iwi Shellbed	1418	62	10	EXT	Lower_Kai_iwi_62_#10E_Col_1_a	1	35	429	267	NA	NA	NA	NA	NA	NA	NA	NA	NA	NA	18.03.2019	EDM
Lower Kai-iwi Shellbed	1419	62	10	EXT	Lower_Kai_iwi_62_#10E_Col_1_a	1	32	511	195	NA	NA	NA	NA	NA	NA	NA	NA	NA	NA	18.03.2019	EDM
Lower Kai-iwi Shellbed	1420	62	10	EXT	Lower_Kai_iwi_62_#10E_Col_1_a	1	39	421	236	NA	NA	NA	NA	NA	NA	NA	NA	NA	NA	18.03.2019	EDM
Lower Kai-iwi Shellbed	1421	62	20	EXT	Lower_Kai_iwi_62_#20E_Col_1_a	1	39	479	266	NA	NA	NA	NA	NA	NA	NA	NA	NA	NA	18.03.2019	EDM
Lower Kai-iwi Shellbed	1422	62	20	EXT	Lower_Kai_iwi_62_#20E_Col_1_a	1	40	518	251	NA	NA	NA	NA	NA	NA	NA	NA	NA	NA	18.03.2019	EDM
Lower Kai-iwi Shellbed	1423	62	20	EXT	Lower_Kai_iwi_62_#20E_Col_1_a	1	41	511	254	NA	NA	NA	NA	NA	NA	NA	NA	NA	NA	18.03.2019	EDM
Lower Kai-iwi Shellbed	1424	62	20	EXT	Lower_Kai_iwi_62_#20E_Col_1_a	1	42	531	225	NA	NA	NA	NA	NA	NA	NA	NA	NA	NA	18.03.2019	EDM
Lower Kai-iwi Shellbed	1425	62	20	EXT	Lower_Kai_iwi_62_#20E_Col_1_a	1	34	480	234	NA	NA	NA	NA	NA	NA	NA	NA	NA	NA	18.03.2019	EDM
Lower Kai-iwi Shellbed	1426	62	20	EXT	Lower_Kai_iwi_62_#20E_Col_1_a	1	35	448	212	NA	NA	NA	NA	NA	NA	NA	NA	NA	NA	18.03.2019	EDM
Lower Kai-iwi Shellbed	1427	62	20	EXT	Lower_Kai_iwi_62_#20E_Col_1_a	1	27	511	261	NA	NA	NA	NA	NA	NA	NA	NA	NA	NA	18.03.2019	EDM
Lower Kai-iwi Shellbed	1428	62	20	EXT	Lower_Kai_iwi_62_#20E_Col_1_a	1	26	555	234	NA	NA	NA	NA	NA	NA	NA	NA	NA	NA	18.03.2019	EDM
Lower Kai-iwi Shellbed	1429	62	20	EXT	Lower_Kai_iwi_62_#20E_Col_1_a	1	9	NA	NA	NA	NA	NA	NA	NA	NA	336	219	NA	NA	18.03.2019	EDM
Lower Kai-iwi Shellbed	1430	62	20	EXT	Lower_Kai_iwi_62_#20E_Col_1_a	1	10	NA	NA	NA	NA	NA	NA	NA	NA	364	158	NA	NA	18.03.2019	EDM
Lower Kai-iwi Shellbed	1431	62	20	EXT	Lower_Kai_iwi_62_#20E_Col_1_a	1	8	NA	NA	NA	NA	NA	NA	NA	NA	284	231	NA	NA	18.03.2019	EDM
Lower Kai-iwi Shellbed	1432	62	20	EXT	Lower_Kai_iwi_62_#20E_Col_1_a	1	1	NA	NA	NA	NA	NA	NA	NA	NA	331	208	NA	NA	18.03.2019	EDM
Lower Kai-iwi Shellbed	1433	62	20	EXT	Lower_Kai_iwi_62_#20E_Col_1_a	1	2	NA	NA	NA	NA	NA	NA	NA	NA	320	183	NA	NA	18.03.2019	EDM
Lower Kai-iwi Shellbed	1434	62	20	EXT	Lower_Kai_iwi_62_#20E_Col_1_a	1	4	NA	NA	NA	NA	NA	NA	NA	NA	282	219	NA	NA	18.03.2019	EDM
Lower Kai-iwi Shellbed	1435	62	20	EXT	Lower_Kai_iwi_62_#20E_Col_2_a	2	31	511	271	NA	NA	NA	NA	NA	NA	NA	NA	NA	NA	18.03.2019	EDM
Lower Kai-iwi Shellbed	1436	62	20	EXT	Lower_Kai_iwi_62_#20E_Col_2_a	2	21	623	263	NA	NA	NA	NA	NA	NA	NA	NA	NA	NA	18.03.2019	EDM
Lower Kai-iwi Shellbed	1437	62	20	EXT	Lower_Kai_iwi_62_#20E_Col_2_a	2	20	583	242	NA	NA	NA	NA	NA	NA	NA	NA	NA	NA	18.03.2019	EDM
Lower Kai-iwi Shellbed	1438	62	20	EXT	Lower_Kai_iwi_62_#20E_Col_2_a	2	27	486	251	NA	NA	NA	NA	NA	NA	NA	NA	NA	NA	18.03.2019	EDM
Lower Kai-iwi Shellbed	1439	62	20	EXT	Lower_Kai_iwi_62_#20E_Col_2_a	2	32	580	261	NA	NA	NA	NA	NA	NA	NA	NA	NA	NA	18.03.2019	EDM
Lower Kai-iwi Shellbed	1440	62	20	EXT	Lower_Kai_iwi_62_#20E_Col_2_a	2	15	NA	NA	NA	NA	NA	NA	NA	NA	322	242	NA	NA	18.03.2019	EDM
Lower Kai-iwi Shellbed	1441	62	20	EXT	Lower_Kai_iwi_62_#20E_Col_2_a	2	8	NA	NA	NA	NA	NA	NA	NA	NA	312	159	NA	NA	18.03.2019	EDM
Lower Kai-iwi Shellbed	1442	62	20	EXT	Lower_Kai_iwi_62_#20E_Col_2_a	2	7	NA	NA	NA	NA	NA	NA	NA	NA	311	160	NA	NA	18.03.2019	EDM
Lower Kai-iwi Shellbed	1443	62	20	EXT	Lower_Kai_iwi_62_#20E_Col_2_a	2	2	NA	NA	NA	NA	NA	NA	NA	NA	304	187	NA	NA	18.03.2019	EDM
Lower Kai-iwi Shellbed	1444	62	20	EXT	Lower_Kai_iwi_62_#20E_Col_2_a	2	4	NA	NA	NA	NA	NA	NA	NA	NA	264	215	NA	NA	18.03.2019	EDM
Lower Kai-iwi Shellbed	1445	62	26	EXT	Lower_Kai_iwi_62_#26E_Col_1_a	1	24	548	237	NA	NA	NA	NA	NA	NA	NA	NA	NA	NA	18.03.2019	EDM
Lower Kai-iwi Shellbed	1446	62	26	EXT	Lower_Kai_iwi_62_#26E_Col_1_a	1	37	551	246	NA	NA	NA	NA	NA	NA	NA	NA	NA	NA	18.03.2019	EDM
Lower Kai-iwi Shellbed	1447	62	26	EXT	Lower_Kai_iwi_62_#26E_Col_1_a	1	38	621	282	NA	NA	NA	NA	NA	NA	NA	NA	NA	NA	18.03.2019	EDM
Lower Kai-iwi Shellbed	1448	62	26	EXT	Lower_Kai_iwi_62_#26E_Col_1_a	1	39	536	282	NA	NA	NA	NA	NA	NA	NA	NA	NA	NA	18.03.2019	EDM
Lower Kai-iwi Shellbed	1449	62	26	EXT	Lower_Kai_iwi_62_#26E_Col_1_a	1	41	507	253	NA	NA	NA	NA	NA	NA	NA	NA	NA	NA	18.03.2019	EDM
Lower Kai-iwi Shellbed	1450	62	26	EXT	Lower_Kai_iwi_62_#26E_Col_1_a	1	32	535	298	NA	NA	NA	NA	NA	NA	NA	NA	NA	NA	18.03.2019	EDM
Lower Kai-iwi Shellbed	1451	62	26	EXT	Lower_Kai_iwi_62_#26E_Col_1_a	1	31	484	268	NA	NA	NA	NA	NA	NA	NA	NA	NA	NA	18.03.2019	EDM
Lower Kai-iwi Shellbed	1452	62	26	EXT	Lower_Kai_iwi_62_#26E_Col_1_a	1	21	471	308	NA	NA	NA	NA	NA	NA	NA	NA	NA	NA	18.03.2019	EDM
Lower Kai-iwi Shellbed	1453	62	26	EXT	Lower_Kai_iwi_62_#26E_Col_1_a	1	18	NA	NA	NA	NA	NA	NA	NA	NA	392	289	NA	NA	18.03.2019	EDM
Lower Kai-iwi Shellbed	1454	62	26	EXT	Lower_Kai_iwi_62_#26E_Col_1_a	1	17	NA	NA	NA	NA	NA	NA	NA	NA	308	216	NA	NA	18.03.2019	EDM
Lower Kai-iwi Shellbed	1455	62	26	EXT	Lower_Kai_iwi_62_#26E_Col_1_a	1	16	NA	NA	NA	NA	NA	NA	NA	NA	446	271	NA	NA	18.03.2019	EDM
Lower Kai-iwi Shellbed	1456	62	26	EXT	Lower_Kai_iwi_62_#26E_Col_1_a	1	19	NA	NA	NA	NA	NA	NA	NA	NA	402	234	NA	NA	18.03.2019	EDM
Lower Kai-iwi Shellbed	1457	62	26	EXT	Lower_Kai_iwi_62_#26E_Col_1_a	1	14	NA	NA	NA	NA	NA	NA	NA	NA	348	231	NA	NA	18.03.2019	EDM
Lower Kai-iwi Shellbed	1458	62	26	EXT	Lower_Kai_iwi_62_#26E_Col_1_a	1	9	NA	NA	NA	NA	NA	NA	NA	NA	310	278	NA	NA	18.03.2019	EDM
Lower Kai-iwi Shellbed	1459	62	27	EXT	Lower_Kai_iwi_62_#27E_Col_1_a	1	1	NA	NA	NA	NA	163	245	41	73	NA	NA	NA	NA	18.03.2019	EDM
Lower Kai-iwi Shellbed	1460	62	27	EXT	Lower_Kai_iwi_62_#27E_Col_1_a	1	3	NA	NA	NA	NA	140	256	45	91	NA	NA	NA	NA	18.03.2019	EDM
Lower Kai-iwi Shellbed	1461	62	27	EXT	Lower_Kai_iwi_62_#27E_Col_1_a	1	7	NA	NA	NA	NA	NA	NA	NA	NA	285	185	NA	NA	18.03.2019	EDM
Lower Kai-iwi Shellbed	1462	62	27	EXT	Lower_Kai_iwi_62_#27E_Col_1_a	1	8	NA	NA	NA	NA	NA	NA	NA	NA	241	201	NA	NA	18.03.2019	EDM
Lower Kai-iwi Shellbed	1463	62	27	EXT	Lower_Kai_iwi_62_#27E_Col_1_a	1	19	NA	NA	NA	NA	NA	NA	NA	NA	322	240	NA	NA	18.03.2019	EDM
Lower Kai-iwi Shellbed	1464	62	27	EXT	Lower_Kai_iwi_62_#27E_Col_1_a	1	9	NA	NA	NA	NA	NA	NA	NA	NA	227	208	NA	NA	18.03.2019	EDM
Lower Kai-iwi Shellbed	1465	62	27	EXT	Lower_Kai_iwi_62_#27E_Col_1_a	1	10	NA	NA	NA	NA	NA	NA	NA	NA	346	216	NA	NA	18.03.2019	EDM
Lower Kai-iwi Shellbed	1466	62	27	EXT	Lower_Kai_iwi_62_#27E_Col_1_a	1	24	NA	NA	NA	NA	NA	NA	NA	NA	311	222	NA	NA	18.03.2019	EDM
Lower Kai-iwi Shellbed	1467	62	27	EXT	Lower_Kai_iwi_62_#27E_Col_1_a	1	41	406	236	NA	NA	NA	NA	NA	NA	NA	NA	NA	NA	18.03.2019	EDM
Lower Kai-iwi Shellbed	1468	62	27	EXT	Lower_Kai_iwi_62_#27E_Col_1_a	1	38	477	272	NA	NA	NA	NA	NA	NA	NA	NA	NA	NA	18.03.2019	EDM
Lower Kai-iwi Shellbed	1469	62	27	EXT	Lower_Kai_iwi_62_#27E_Col_1_a	1	37	457	264	NA	NA	NA	NA	NA	NA	NA	NA	NA	NA	18.03.2019	EDM
Lower Kai-iwi Shellbed	1470	62	27	EXT	Lower_Kai_iwi_62_#27E_Col_1_a	1	35	491	210	NA	NA	NA	NA	NA	NA	NA	NA	NA	NA	18.03.2019	EDM
Lower Kai-iwi Shellbed	1471	62	27	EXT	Lower_Kai_iwi_62_#27E_Col_1_a	1	34	510	233	NA	NA	NA	NA	NA	NA	NA	NA	NA	NA	18.03.2019	EDM
Lower Kai-iwi Shellbed	1472	62	27	EXT	Lower_Kai_iwi_62_#27E_Col_1_a	1	45	419	268	NA	NA	NA	NA	NA	NA	NA	NA	NA	NA	18.03.2019	EDM
Lower Kai-iwi Shellbed	1473	62	27	EXT	Lower_Kai_iwi_62_#27E_Col_1_a	1	43	468	257	NA	NA	NA	NA	NA	NA	NA	NA	NA	NA	18.03.2019	EDM
Lower Kai-iwi Shellbed	1474	62	27	EXT	Lower_Kai_iwi_62_#27E_Col_1_a	1	42	547	240	NA	NA	NA	NA	NA	NA	NA	NA	NA	NA	18.03.2019	EDM
Lower Kai-iwi Shellbed	1475	62	27	EXT	Lower_Kai_iwi_62_#27E_Col_1_a	1	5	NA	NA	NA	NA	NA	NA	NA	NA	301	185	NA	NA	18.03.2019	EDM
Lower Kai-iwi Shellbed	1476	62	27	EXT	Lower_Kai_iwi_62_#27E_Col_1_a	1	4	NA	NA	NA	NA	NA	NA	NA	NA	290	180	NA	NA	18.03.2019	EDM
Lower Kai-iwi Shellbed	1477	62	27	EXT	Lower_Kai_iwi_62_#27E_Col_2_a	2	1	NA	NA	NA	NA	167	283	NA	NA	NA	NA	NA	NA	18.03.2019	EDM
Lower Kai-iwi Shellbed	1478	62	27	EXT	Lower_Kai_iwi_62_#27E_Col_2_a	2	2	NA	NA	NA	NA	158	286	NA	NA	NA	NA	NA	NA	18.03.2019	EDM
Lower Kai-iwi Shellbed	1479	62	27	EXT	Lower_Kai_iwi_62_#27E_Col_2_a	2	23	482	250	NA	NA	NA	NA	NA	NA	NA	NA	NA	NA	18.03.2019	EDM
Lower Kai-iwi Shellbed	1480	62	27	EXT	Lower_Kai_iwi_62_#27E_Col_2_a	2	27	492	251	NA	NA	NA	NA	NA	NA	NA	NA	NA	NA	18.03.2019	EDM
Lower Kai-iwi Shellbed	1481	62	27	EXT	Lower_Kai_iwi_62_#27E_Col_2_a	2	25	485	245	NA	NA	NA	NA	NA	NA	NA	NA	NA	NA	18.03.2019	EDM
Lower Kai-iwi Shellbed	1482	62	27	EXT	Lower_Kai_iwi_62_#27E_Col_2_a	2	22	369	216	NA	NA	NA	NA	NA	NA	NA	NA	NA	NA	18.03.2019	EDM
Lower Kai-iwi Shellbed	1483	62	27	EXT	Lower_Kai_iwi_62_#27E_Col_2_a	2	28	497	241	NA	NA	NA	NA	NA	NA	NA	NA	NA	NA	18.03.2019	EDM
Lower Kai-iwi Shellbed	1484	62	27	EXT	Lower_Kai_iwi_62_#27E_Col_2_a	2	3	NA	NA	NA	NA	NA	NA	NA	NA	369	225	NA	NA	18.03.2019	EDM
Lower Kai-iwi Shellbed	1485	62	27	EXT	Lower_Kai_iwi_62_#27E_Col_2_a	2	4	NA	NA	NA	NA	NA	NA	NA	NA	314	210	NA	NA	18.03.2019	EDM
Lower Kai-iwi Shellbed	1486	62	27	EXT	Lower_Kai_iwi_62_#27E_Col_2_a	2	5	NA	NA	NA	NA	NA	NA	NA	NA	301	211	NA	NA	18.03.2019	EDM
Lower Kai-iwi Shellbed	1487	62	27	EXT	Lower_Kai_iwi_62_#27E_Col_2_a	2	6	NA	NA	NA	NA	NA	NA	NA	NA	335	186	NA	NA	18.03.2019	EDM
Lower Kai-iwi Shellbed	1488	62	27	EXT	Lower_Kai_iwi_62_#27E_Col_2_a	2	8	NA	NA	NA	NA	NA	NA	NA	NA	336	234	NA	NA	18.03.2019	EDM
Shakespeare Cliff Basal Sand Shellbed	1489	21	1	INT	SCBSSB_21_#1I_Col_1_a	1	35	417	195	NA	NA	NA	NA	NA	NA	NA	NA	NA	NA	19.03.2019	EDM
Shakespeare Cliff Basal Sand Shellbed	1490	21	1	INT	SCBSSB_21_#1I_Col_1_a	1	31	434	187	NA	NA	NA	NA	NA	NA	NA	NA	NA	NA	19.03.2019	EDM
Shakespeare Cliff Basal Sand Shellbed	1491	21	1	INT	SCBSSB_21_#1I_Col_1_a	1	17	442	208	NA	NA	NA	NA	NA	NA	NA	NA	NA	NA	19.03.2019	EDM
Shakespeare Cliff Basal Sand Shellbed	1492	21	1	INT	SCBSSB_21_#1I_Col_1_a	1	41	403	205	NA	NA	NA	NA	NA	NA	NA	NA	NA	NA	19.03.2019	EDM
Shakespeare Cliff Basal Sand Shellbed	1493	21	1	INT	SCBSSB_21_#1I_Col_1_a	1	43	464	177	NA	NA	NA	NA	NA	NA	NA	NA	NA	NA	19.03.2019	EDM
Shakespeare Cliff Basal Sand Shellbed	1494	21	1	INT	SCBSSB_21_#1I_Col_1_a	1	11	NA	NA	NA	NA	NA	NA	NA	NA	275	170	NA	NA	19.03.2019	EDM
Shakespeare Cliff Basal Sand Shellbed	1495	21	1	INT	SCBSSB_21_#1I_Col_1_a	1	7	NA	NA	NA	NA	NA	NA	NA	NA	284	175	NA	NA	19.03.2019	EDM
Shakespeare Cliff Basal Sand Shellbed	1496	21	1	INT	SCBSSB_21_#1I_Col_1_a	1	2	NA	NA	NA	NA	NA	NA	NA	NA	315	178	NA	NA	19.03.2019	EDM
Shakespeare Cliff Basal Sand Shellbed	1497	21	1	INT	SCBSSB_21_#1I_Col_1_a	1	5	NA	NA	NA	NA	NA	NA	NA	NA	234	187	NA	NA	19.03.2019	EDM
Shakespeare Cliff Basal Sand Shellbed	1498	21	1	INT	SCBSSB_21_#1I_Col_1_a	1	4	NA	NA	NA	NA	NA	NA	NA	NA	284	168	NA	NA	19.03.2019	EDM
Shakespeare Cliff Basal Sand Shellbed	1499	21	1	INT	SCBSSB_21_#1I_Col_2_a	2	2	NA	NA	NA	NA	187	226	NA	NA	NA	NA	NA	NA	19.03.2019	EDM
Shakespeare Cliff Basal Sand Shellbed	1500	21	1	INT	SCBSSB_21_#1I_Col_2_a	2	1	NA	NA	NA	NA	151	242	NA	NA	NA	NA	NA	NA	19.03.2019	EDM
Shakespeare Cliff Basal Sand Shellbed	1501	21	1	INT	SCBSSB_21_#1I_Col_2_a	2	5	NA	NA	NA	NA	161	254	NA	NA	NA	NA	NA	NA	19.03.2019	EDM
Shakespeare Cliff Basal Sand Shellbed	1502	21	1	INT	SCBSSB_21_#1I_Col_2_a	2	6	NA	NA	NA	NA	181	234	NA	NA	NA	NA	NA	NA	19.03.2019	EDM
Shakespeare Cliff Basal Sand Shellbed	1503	21	1	INT	SCBSSB_21_#1I_Col_2_a	2	3	NA	NA	NA	NA	175	244	NA	NA	NA	NA	NA	NA	19.03.2019	EDM
Shakespeare Cliff Basal Sand Shellbed	1504	21	1	INT	SCBSSB_21_#1I_Col_2_a	2	50	568	254	NA	NA	NA	NA	NA	NA	NA	NA	NA	NA	19.03.2019	EDM
Shakespeare Cliff Basal Sand Shellbed	1505	21	1	INT	SCBSSB_21_#1I_Col_2_a	2	57	521	231	NA	NA	NA	NA	NA	NA	NA	NA	NA	NA	19.03.2019	EDM
Shakespeare Cliff Basal Sand Shellbed	1506	21	1	INT	SCBSSB_21_#1I_Col_2_a	2	43	465	226	NA	NA	NA	NA	NA	NA	NA	NA	NA	NA	19.03.2019	EDM
Shakespeare Cliff Basal Sand Shellbed	1507	21	1	INT	SCBSSB_21_#1I_Col_2_a	2	44	476	226	NA	NA	NA	NA	NA	NA	NA	NA	NA	NA	19.03.2019	EDM
Shakespeare Cliff Basal Sand Shellbed	1508	21	1	INT	SCBSSB_21_#1I_Col_2_a	2	33	433	181	NA	NA	NA	NA	NA	NA	NA	NA	NA	NA	19.03.2019	EDM
Shakespeare Cliff Basal Sand Shellbed	1509	21	1	INT	SCBSSB_21_#1I_Col_2_a	2	26	NA	NA	NA	NA	NA	NA	NA	NA	265	215	NA	NA	19.03.2019	EDM
Shakespeare Cliff Basal Sand Shellbed	1510	21	1	INT	SCBSSB_21_#1I_Col_2_a	2	31	NA	NA	NA	NA	NA	NA	NA	NA	353	117	NA	NA	19.03.2019	EDM
Shakespeare Cliff Basal Sand Shellbed	1511	21	1	INT	SCBSSB_21_#1I_Col_2_a	2	15	NA	NA	NA	NA	NA	NA	NA	NA	418	195	NA	NA	19.03.2019	EDM
Shakespeare Cliff Basal Sand Shellbed	1512	21	1	INT	SCBSSB_21_#1I_Col_2_a	2	11	NA	NA	NA	NA	NA	NA	NA	NA	271	192	NA	NA	19.03.2019	EDM
Shakespeare Cliff Basal Sand Shellbed	1513	21	1	INT	SCBSSB_21_#1I_Col_2_a	2	8	NA	NA	NA	NA	NA	NA	NA	NA	233	193	NA	NA	19.03.2019	EDM
Shakespeare Cliff Basal Sand Shellbed	1514	21	1	INT	SCBSSB_21_#1I_Col_2_a	2	27	NA	NA	NA	NA	NA	NA	NA	NA	450	115	NA	NA	19.03.2019	EDM
Shakespeare Cliff Basal Sand Shellbed	1515	21	1	INT	SCBSSB_21_#1I_Col_2_a	2	29	NA	NA	NA	NA	NA	NA	NA	NA	454	137	NA	NA	19.03.2019	EDM
Shakespeare Cliff Basal Sand Shellbed	1516	21	1	INT	SCBSSB_21_#1I_Col_2_b	2	3	NA	NA	NA	NA	149	250	NA	NA	NA	NA	NA	NA	19.03.2019	EDM
Shakespeare Cliff Basal Sand Shellbed	1517	21	1	INT	SCBSSB_21_#1I_Col_2_b	2	4	NA	NA	NA	NA	172	241	NA	NA	NA	NA	NA	NA	19.03.2019	EDM
Shakespeare Cliff Basal Sand Shellbed	1518	21	1	INT	SCBSSB_21_#1I_Col_2_b	2	1	NA	NA	NA	NA	167	243	NA	NA	NA	NA	NA	NA	19.03.2019	EDM
Shakespeare Cliff Basal Sand Shellbed	1519	21	1	INT	SCBSSB_21_#1I_Col_2_b	2	2	NA	NA	NA	NA	176	240	NA	NA	NA	NA	NA	NA	19.03.2019	EDM
Shakespeare Cliff Basal Sand Shellbed	1520	21	1	INT	SCBSSB_21_#1I_Col_2_b	2	45	440	211	NA	NA	NA	NA	NA	NA	NA	NA	NA	NA	19.03.2019	EDM
Shakespeare Cliff Basal Sand Shellbed	1521	21	1	INT	SCBSSB_21_#1I_Col_2_b	2	49	368	220	NA	NA	NA	NA	NA	NA	NA	NA	NA	NA	19.03.2019	EDM
Shakespeare Cliff Basal Sand Shellbed	1522	21	1	INT	SCBSSB_21_#1I_Col_2_b	2	34	385	237	NA	NA	NA	NA	NA	NA	NA	NA	NA	NA	19.03.2019	EDM
Shakespeare Cliff Basal Sand Shellbed	1523	21	1	INT	SCBSSB_21_#1I_Col_2_b	2	31	501	228	NA	NA	NA	NA	NA	NA	NA	NA	NA	NA	19.03.2019	EDM
Shakespeare Cliff Basal Sand Shellbed	1524	21	1	INT	SCBSSB_21_#1I_Col_2_b	2	56	487	212	NA	NA	NA	NA	NA	NA	NA	NA	NA	NA	19.03.2019	EDM
Shakespeare Cliff Basal Sand Shellbed	1525	21	1	INT	SCBSSB_21_#1I_Col_2_b	2	21	NA	NA	NA	NA	NA	NA	NA	NA	310	143	NA	NA	19.03.2019	EDM
Shakespeare Cliff Basal Sand Shellbed	1526	21	1	INT	SCBSSB_21_#1I_Col_2_b	2	12	NA	NA	NA	NA	NA	NA	NA	NA	233	150	NA	NA	19.03.2019	EDM
Shakespeare Cliff Basal Sand Shellbed	1527	21	1	INT	SCBSSB_21_#1I_Col_2_b	2	19	NA	NA	NA	NA	NA	NA	NA	NA	243	200	NA	NA	19.03.2019	EDM
Shakespeare Cliff Basal Sand Shellbed	1528	21	1	INT	SCBSSB_21_#1I_Col_2_b	2	9	NA	NA	NA	NA	NA	NA	NA	NA	269	237	NA	NA	19.03.2019	EDM
Shakespeare Cliff Basal Sand Shellbed	1529	21	1	INT	SCBSSB_21_#1I_Col_2_b	2	6	NA	NA	NA	NA	NA	NA	NA	NA	228	189	NA	NA	19.03.2019	EDM
Shakespeare Cliff Basal Sand Shellbed	1530	21	2	INT	SCBSSB_21_#2I_Col_1_a	1	1	NA	NA	NA	NA	187	214	NA	NA	NA	NA	NA	NA	19.03.2019	EDM
Shakespeare Cliff Basal Sand Shellbed	1531	21	2	INT	SCBSSB_21_#2I_Col_1_a	1	2	NA	NA	NA	NA	182	234	NA	NA	NA	NA	NA	NA	19.03.2019	EDM
Shakespeare Cliff Basal Sand Shellbed	1532	21	2	INT	SCBSSB_21_#2I_Col_1_a	1	3	NA	NA	NA	NA	198	250	NA	NA	NA	NA	NA	NA	19.03.2019	EDM
Shakespeare Cliff Basal Sand Shellbed	1533	21	2	INT	SCBSSB_21_#2I_Col_1_a	1	5	NA	NA	NA	NA	177	209	NA	NA	NA	NA	NA	NA	19.03.2019	EDM
Shakespeare Cliff Basal Sand Shellbed	1534	21	2	INT	SCBSSB_21_#2I_Col_1_a	1	4	NA	NA	NA	NA	157	206	NA	NA	NA	NA	NA	NA	19.03.2019	EDM
Shakespeare Cliff Basal Sand Shellbed	1535	21	2	INT	SCBSSB_21_#2I_Col_1_a	1	31	509	215	NA	NA	NA	NA	NA	NA	NA	NA	NA	NA	19.03.2019	EDM
Shakespeare Cliff Basal Sand Shellbed	1536	21	2	INT	SCBSSB_21_#2I_Col_1_a	1	26	539	240	NA	NA	NA	NA	NA	NA	NA	NA	NA	NA	19.03.2019	EDM
Shakespeare Cliff Basal Sand Shellbed	1537	21	2	INT	SCBSSB_21_#2I_Col_1_a	1	29	536	233	NA	NA	NA	NA	NA	NA	NA	NA	NA	NA	19.03.2019	EDM
Shakespeare Cliff Basal Sand Shellbed	1538	21	2	INT	SCBSSB_21_#2I_Col_1_a	1	40	436	241	NA	NA	NA	NA	NA	NA	NA	NA	NA	NA	19.03.2019	EDM
Shakespeare Cliff Basal Sand Shellbed	1539	21	2	INT	SCBSSB_21_#2I_Col_1_a	1	20	458	226	NA	NA	NA	NA	NA	NA	NA	NA	NA	NA	19.03.2019	EDM
Shakespeare Cliff Basal Sand Shellbed	1540	21	11	INT	SCBSSB_21_#11I_Col_1_a	1	4	NA	NA	NA	NA	199	245	NA	NA	NA	NA	NA	NA	19.03.2019	EDM
Shakespeare Cliff Basal Sand Shellbed	1541	21	11	INT	SCBSSB_21_#11I_Col_1_a	1	3	NA	NA	NA	NA	159	263	NA	NA	NA	NA	NA	NA	19.03.2019	EDM
Shakespeare Cliff Basal Sand Shellbed	1542	21	11	INT	SCBSSB_21_#11I_Col_1_a	1	2	NA	NA	NA	NA	183	237	NA	NA	NA	NA	NA	NA	19.03.2019	EDM
Shakespeare Cliff Basal Sand Shellbed	1543	21	11	INT	SCBSSB_21_#11I_Col_1_a	1	1	NA	NA	NA	NA	185	260	NA	NA	NA	NA	NA	NA	19.03.2019	EDM
Shakespeare Cliff Basal Sand Shellbed	1544	21	11	INT	SCBSSB_21_#11I_Col_1_a	1	44	434	191	NA	NA	NA	NA	NA	NA	NA	NA	NA	NA	19.03.2019	EDM
Shakespeare Cliff Basal Sand Shellbed	1545	21	11	INT	SCBSSB_21_#11I_Col_1_a	1	43	496	208	NA	NA	NA	NA	NA	NA	NA	NA	NA	NA	19.03.2019	EDM
Shakespeare Cliff Basal Sand Shellbed	1546	21	11	INT	SCBSSB_21_#11I_Col_1_a	1	42	472	171	NA	NA	NA	NA	NA	NA	NA	NA	NA	NA	19.03.2019	EDM
Shakespeare Cliff Basal Sand Shellbed	1547	21	11	INT	SCBSSB_21_#11I_Col_1_a	1	34	549	171	NA	NA	NA	NA	NA	NA	NA	NA	NA	NA	19.03.2019	EDM
Shakespeare Cliff Basal Sand Shellbed	1548	21	11	INT	SCBSSB_21_#11I_Col_1_a	1	49	505	191	NA	NA	NA	NA	NA	NA	NA	NA	NA	NA	19.03.2019	EDM
Shakespeare Cliff Basal Sand Shellbed	1549	21	11	INT	SCBSSB_21_#11I_Col_2_a	2	6	NA	NA	NA	NA	164	244	NA	NA	NA	NA	NA	NA	19.03.2019	EDM
Shakespeare Cliff Basal Sand Shellbed	1550	21	11	INT	SCBSSB_21_#11I_Col_2_a	2	7	NA	NA	NA	NA	165	269	NA	NA	NA	NA	NA	NA	19.03.2019	EDM
Shakespeare Cliff Basal Sand Shellbed	1551	21	11	INT	SCBSSB_21_#11I_Col_2_a	2	8	NA	NA	NA	NA	176	235	NA	NA	NA	NA	NA	NA	19.03.2019	EDM
Shakespeare Cliff Basal Sand Shellbed	1552	21	11	INT	SCBSSB_21_#11I_Col_2_a	2	4	NA	NA	NA	NA	172	226	NA	NA	NA	NA	NA	NA	19.03.2019	EDM
Shakespeare Cliff Basal Sand Shellbed	1553	21	11	INT	SCBSSB_21_#11I_Col_2_a	2	2	NA	NA	NA	NA	192	268	NA	NA	NA	NA	NA	NA	19.03.2019	EDM
Shakespeare Cliff Basal Sand Shellbed	1554	21	11	INT	SCBSSB_21_#11I_Col_2_a	2	37	461	218	NA	NA	NA	NA	NA	NA	NA	NA	NA	NA	19.03.2019	EDM
Shakespeare Cliff Basal Sand Shellbed	1555	21	11	INT	SCBSSB_21_#11I_Col_2_a	2	27	543	197	NA	NA	NA	NA	NA	NA	NA	NA	NA	NA	19.03.2019	EDM
Shakespeare Cliff Basal Sand Shellbed	1556	21	11	INT	SCBSSB_21_#11I_Col_2_a	2	24	459	216	NA	NA	NA	NA	NA	NA	NA	NA	NA	NA	19.03.2019	EDM
Shakespeare Cliff Basal Sand Shellbed	1557	21	11	INT	SCBSSB_21_#11I_Col_2_a	2	26	537	206	NA	NA	NA	NA	NA	NA	NA	NA	NA	NA	19.03.2019	EDM
Shakespeare Cliff Basal Sand Shellbed	1558	21	11	INT	SCBSSB_21_#11I_Col_2_a	2	9	NA	NA	NA	NA	172	247	NA	NA	NA	NA	NA	NA	19.03.2019	EDM
Shakespeare Cliff Basal Sand Shellbed	1559	21	11	INT	SCBSSB_21_#11I_Col_2_a	2	3	NA	NA	NA	NA	181	240	NA	NA	NA	NA	NA	NA	19.03.2019	EDM
Shakespeare Cliff Basal Sand Shellbed	1560	21	11	INT	SCBSSB_21_#11I_Col_3_a	3	49	420	219	NA	NA	NA	NA	NA	NA	NA	NA	NA	NA	19.03.2019	EDM
Shakespeare Cliff Basal Sand Shellbed	1561	21	11	INT	SCBSSB_21_#11I_Col_3_a	3	36	547	202	NA	NA	NA	NA	NA	NA	NA	NA	NA	NA	19.03.2019	EDM
Shakespeare Cliff Basal Sand Shellbed	1562	21	11	INT	SCBSSB_21_#11I_Col_3_a	3	45	533	208	NA	NA	NA	NA	NA	NA	NA	NA	NA	NA	19.03.2019	EDM
Shakespeare Cliff Basal Sand Shellbed	1563	21	11	INT	SCBSSB_21_#11I_Col_3_a	3	55	439	203	NA	NA	NA	NA	NA	NA	NA	NA	NA	NA	19.03.2019	EDM
Shakespeare Cliff Basal Sand Shellbed	1564	21	11	INT	SCBSSB_21_#11I_Col_3_a	3	50	460	273	NA	NA	NA	NA	NA	NA	NA	NA	NA	NA	19.03.2019	EDM
Shakespeare Cliff Basal Sand Shellbed	1565	21	11	INT	SCBSSB_21_#11I_Col_3_a	3	6	NA	NA	NA	NA	NA	NA	NA	NA	305	199	NA	NA	19.03.2019	EDM
Shakespeare Cliff Basal Sand Shellbed	1566	21	11	INT	SCBSSB_21_#11I_Col_3_a	3	14	NA	NA	NA	NA	NA	NA	NA	NA	275	182	NA	NA	19.03.2019	EDM
Shakespeare Cliff Basal Sand Shellbed	1567	21	11	INT	SCBSSB_21_#11I_Col_3_a	3	12	NA	NA	NA	NA	NA	NA	NA	NA	297	214	NA	NA	19.03.2019	EDM
Shakespeare Cliff Basal Sand Shellbed	1568	21	11	INT	SCBSSB_21_#11I_Col_3_a	3	25	NA	NA	NA	NA	NA	NA	NA	NA	333	158	NA	NA	19.03.2019	EDM
Shakespeare Cliff Basal Sand Shellbed	1569	21	11	INT	SCBSSB_21_#11I_Col_3_a	3	1	NA	NA	NA	NA	NA	NA	NA	NA	344	213	NA	NA	19.03.2019	EDM
Shakespeare Cliff Basal Sand Shellbed	1570	21	18	EXT	SCBSSB_21_#18E_Col_1	1	2	NA	NA	NA	NA	185	279	34	104	NA	NA	NA	NA	19.03.2019	EDM
Shakespeare Cliff Basal Sand Shellbed	1571	21	18	EXT	SCBSSB_21_#18E_Col_1	1	1	NA	NA	NA	NA	183	249	NA	NA	NA	NA	NA	NA	19.03.2019	EDM
Shakespeare Cliff Basal Sand Shellbed	1572	21	18	EXT	SCBSSB_21_#18E_Col_1	1	18	496	204	NA	NA	NA	NA	NA	NA	NA	NA	NA	NA	19.03.2019	EDM
Shakespeare Cliff Basal Sand Shellbed	1573	21	18	EXT	SCBSSB_21_#18E_Col_1	1	15	487	213	NA	NA	NA	NA	NA	NA	NA	NA	NA	NA	19.03.2019	EDM
Shakespeare Cliff Basal Sand Shellbed	1574	21	18	EXT	SCBSSB_21_#18E_Col_1	1	22	525	201	NA	NA	NA	NA	NA	NA	NA	NA	NA	NA	19.03.2019	EDM
Shakespeare Cliff Basal Sand Shellbed	1575	21	18	EXT	SCBSSB_21_#18E_Col_1	1	17	527	183	NA	NA	NA	NA	NA	NA	NA	NA	NA	NA	19.03.2019	EDM
Shakespeare Cliff Basal Sand Shellbed	1576	21	18	EXT	SCBSSB_21_#18E_Col_1	1	24	539	215	NA	NA	NA	NA	NA	NA	NA	NA	NA	NA	19.03.2019	EDM
Shakespeare Cliff Basal Sand Shellbed	1577	21	18	EXT	SCBSSB_21_#18E_Col_1	1	7	NA	NA	NA	NA	NA	NA	NA	NA	245	199	NA	NA	19.03.2019	EDM
Shakespeare Cliff Basal Sand Shellbed	1578	21	18	EXT	SCBSSB_21_#18E_Col_1	1	6	NA	NA	NA	NA	NA	NA	NA	NA	350	201	NA	NA	19.03.2019	EDM
Shakespeare Cliff Basal Sand Shellbed	1579	21	18	EXT	SCBSSB_21_#18E_Col_1	1	5	NA	NA	NA	NA	NA	NA	NA	NA	360	210	NA	NA	19.03.2019	EDM
Shakespeare Cliff Basal Sand Shellbed	1580	21	18	INT	SCBSSB_21_#18I_Col_2_a	2	4	NA	NA	NA	NA	170	240	45	76	NA	NA	NA	NA	19.03.2019	EDM
Shakespeare Cliff Basal Sand Shellbed	1581	21	18	INT	SCBSSB_21_#18I_Col_2_a	2	5	NA	NA	NA	NA	168	260	NA	NA	NA	NA	NA	NA	19.03.2019	EDM
Shakespeare Cliff Basal Sand Shellbed	1582	21	18	INT	SCBSSB_21_#18I_Col_2_a	2	6	NA	NA	NA	NA	169	255	NA	NA	NA	NA	NA	NA	19.03.2019	EDM
Shakespeare Cliff Basal Sand Shellbed	1583	21	18	INT	SCBSSB_21_#18I_Col_2_a	2	7	NA	NA	NA	NA	161	255	NA	NA	NA	NA	NA	NA	19.03.2019	EDM
Shakespeare Cliff Basal Sand Shellbed	1584	21	18	INT	SCBSSB_21_#18I_Col_2_a	2	2	NA	NA	NA	NA	165	265	NA	NA	NA	NA	NA	NA	19.03.2019	EDM
Shakespeare Cliff Basal Sand Shellbed	1585	21	18	INT	SCBSSB_21_#18I_Col_2_a	2	1	NA	NA	NA	NA	171	280	NA	NA	NA	NA	NA	NA	19.03.2019	EDM
Shakespeare Cliff Basal Sand Shellbed	1586	21	18	INT	SCBSSB_21_#18I_Col_2_a	2	3	NA	NA	NA	NA	164	257	NA	NA	NA	NA	NA	NA	19.03.2019	EDM
Shakespeare Cliff Basal Sand Shellbed	1587	21	18	INT	SCBSSB_21_#18I_Col_2_a	2	9	NA	NA	NA	NA	NA	NA	NA	NA	356	206	NA	NA	19.03.2019	EDM
Shakespeare Cliff Basal Sand Shellbed	1588	21	18	INT	SCBSSB_21_#18I_Col_2_a	2	10	NA	NA	NA	NA	NA	NA	NA	NA	297	202	NA	NA	19.03.2019	EDM
Shakespeare Cliff Basal Sand Shellbed	1589	21	18	INT	SCBSSB_21_#18I_Col_2_a	2	16	437	204	NA	NA	NA	NA	NA	NA	NA	NA	NA	NA	19.03.2019	EDM
Shakespeare Cliff Basal Sand Shellbed	1590	21	18	INT	SCBSSB_21_#18I_Col_2_a	2	33	475	179	NA	NA	NA	NA	NA	NA	NA	NA	NA	NA	19.03.2019	EDM
Shakespeare Cliff Basal Sand Shellbed	1591	21	18	INT	SCBSSB_21_#18I_Col_2_a	2	30	509	210	NA	NA	NA	NA	NA	NA	NA	NA	NA	NA	19.03.2019	EDM
Shakespeare Cliff Basal Sand Shellbed	1592	21	18	INT	SCBSSB_21_#18I_Col_2_a	2	22	487	197	NA	NA	NA	NA	NA	NA	NA	NA	NA	NA	19.03.2019	EDM
Shakespeare Cliff Basal Sand Shellbed	1593	21	25	INT	SCBSSB_21_#25I_Col_1_a	1	2	NA	NA	NA	NA	174	230	58	87	NA	NA	NA	NA	19.03.2019	EDM
Shakespeare Cliff Basal Sand Shellbed	1594	21	25	INT	SCBSSB_21_#25I_Col_1_a	1	3	NA	NA	NA	NA	183	235	NA	NA	NA	NA	NA	NA	19.03.2019	EDM
Shakespeare Cliff Basal Sand Shellbed	1595	21	25	INT	SCBSSB_21_#25I_Col_1_a	1	1	NA	NA	NA	NA	167	232	NA	NA	NA	NA	NA	NA	19.03.2019	EDM
Shakespeare Cliff Basal Sand Shellbed	1596	21	25	INT	SCBSSB_21_#25I_Col_1_a	1	4	NA	NA	NA	NA	164	233	60	100	NA	NA	NA	NA	19.03.2019	EDM
Shakespeare Cliff Basal Sand Shellbed	1597	21	25	INT	SCBSSB_21_#25I_Col_1_a	1	5	NA	NA	NA	NA	164	237	62	84	NA	NA	NA	NA	19.03.2019	EDM
Shakespeare Cliff Basal Sand Shellbed	1598	21	25	INT	SCBSSB_21_#25I_Col_1_a	1	7	NA	NA	NA	NA	176	225	NA	NA	NA	NA	NA	NA	19.03.2019	EDM
Shakespeare Cliff Basal Sand Shellbed	1599	21	25	INT	SCBSSB_21_#25I_Col_1_a	1	34	545	205	NA	NA	NA	NA	NA	NA	NA	NA	NA	NA	19.03.2019	EDM
Shakespeare Cliff Basal Sand Shellbed	1600	21	25	INT	SCBSSB_21_#25I_Col_1_a	1	32	490	207	NA	NA	NA	NA	NA	NA	NA	NA	NA	NA	19.03.2019	EDM
Shakespeare Cliff Basal Sand Shellbed	1601	21	25	INT	SCBSSB_21_#25I_Col_1_a	1	20	501	223	NA	NA	NA	NA	NA	NA	NA	NA	NA	NA	19.03.2019	EDM
Shakespeare Cliff Basal Sand Shellbed	1602	21	25	INT	SCBSSB_21_#25I_Col_1_a	1	22	406	192	NA	NA	NA	NA	NA	NA	NA	NA	NA	NA	19.03.2019	EDM
Shakespeare Cliff Basal Sand Shellbed	1603	21	25	INT	SCBSSB_21_#25I_Col_1_a	1	18	550	221	NA	NA	NA	NA	NA	NA	NA	NA	NA	NA	19.03.2019	EDM
Shakespeare Cliff Basal Sand Shellbed	1604	21	25	INT	SCBSSB_21_#25I_Col_1_a	1	9	NA	NA	NA	NA	NA	NA	NA	NA	363	183	NA	NA	19.03.2019	EDM
Shakespeare Cliff Basal Sand Shellbed	1605	21	25	INT	SCBSSB_21_#25I_Col_1_a	1	10	NA	NA	NA	NA	NA	NA	NA	NA	289	228	NA	NA	19.03.2019	EDM
Shakespeare Cliff Basal Sand Shellbed	1606	21	25	INT	SCBSSB_21_#25I_Col_2_a	2	3	NA	NA	NA	NA	185	236	46	92	NA	NA	NA	NA	19.03.2019	EDM
Shakespeare Cliff Basal Sand Shellbed	1607	21	25	INT	SCBSSB_21_#25I_Col_2_a	2	5	NA	NA	NA	NA	186	259	60	102	NA	NA	NA	NA	19.03.2019	EDM
Shakespeare Cliff Basal Sand Shellbed	1608	21	25	INT	SCBSSB_21_#25I_Col_2_a	2	7	NA	NA	NA	NA	197	233	NA	NA	NA	NA	NA	NA	19.03.2019	EDM
Shakespeare Cliff Basal Sand Shellbed	1609	21	25	INT	SCBSSB_21_#25I_Col_2_a	2	1	NA	NA	NA	NA	171	231	NA	NA	NA	NA	NA	NA	19.03.2019	EDM
Shakespeare Cliff Basal Sand Shellbed	1610	21	25	INT	SCBSSB_21_#25I_Col_2_a	2	2	NA	NA	NA	NA	175	228	NA	NA	NA	NA	NA	NA	19.03.2019	EDM
Shakespeare Cliff Basal Sand Shellbed	1611	21	25	INT	SCBSSB_21_#25I_Col_2_a	2	6	NA	NA	NA	NA	178	267	53	106	NA	NA	NA	NA	19.03.2019	EDM
Shakespeare Cliff Basal Sand Shellbed	1612	21	25	INT	SCBSSB_21_#25I_Col_2_a	2	8	NA	NA	NA	NA	183	229	NA	NA	NA	NA	NA	NA	19.03.2019	EDM
Shakespeare Cliff Basal Sand Shellbed	1613	21	25	INT	SCBSSB_21_#25I_Col_2_a	2	9	NA	NA	NA	NA	NA	NA	NA	NA	337	235	NA	NA	19.03.2019	EDM
Shakespeare Cliff Basal Sand Shellbed	1614	21	25	INT	SCBSSB_21_#25I_Col_2_a	2	12	NA	NA	NA	NA	NA	NA	NA	NA	300	225	NA	NA	19.03.2019	EDM
Shakespeare Cliff Basal Sand Shellbed	1615	21	25	INT	SCBSSB_21_#25I_Col_2_a	2	10	NA	NA	NA	NA	NA	NA	NA	NA	303	223	NA	NA	19.03.2019	EDM
Shakespeare Cliff Basal Sand Shellbed	1616	21	25	INT	SCBSSB_21_#25I_Col_2_a	2	17	517	218	NA	NA	NA	NA	NA	NA	NA	NA	NA	NA	19.03.2019	EDM
Shakespeare Cliff Basal Sand Shellbed	1617	21	25	INT	SCBSSB_21_#25I_Col_2_a	2	25	408	200	NA	NA	NA	NA	NA	NA	NA	NA	NA	NA	19.03.2019	EDM
Shakespeare Cliff Basal Sand Shellbed	1618	21	25	INT	SCBSSB_21_#25I_Col_2_a	2	39	422	205	NA	NA	NA	NA	NA	NA	NA	NA	NA	NA	19.03.2019	EDM
Shakespeare Cliff Basal Sand Shellbed	1619	21	25	INT	SCBSSB_21_#25I_Col_2_a	2	24	413	219	NA	NA	NA	NA	NA	NA	NA	NA	NA	NA	19.03.2019	EDM
Shakespeare Cliff Basal Sand Shellbed	1620	21	25	INT	SCBSSB_21_#25I_Col_2_a	2	26	474	201	NA	NA	NA	NA	NA	NA	NA	NA	NA	NA	19.03.2019	EDM
Shakespeare Cliff Basal Sand Shellbed	1621	23	13	INT	SCBSSB_23_#13I_Col_1_a	1	8	NA	NA	NA	NA	175	243	NA	NA	NA	NA	NA	NA	19.03.2019	EDM
Shakespeare Cliff Basal Sand Shellbed	1622	23	13	INT	SCBSSB_23_#13I_Col_1_a	1	9	NA	NA	NA	NA	186	224	45	88	NA	NA	NA	NA	19.03.2019	EDM
Shakespeare Cliff Basal Sand Shellbed	1623	23	13	INT	SCBSSB_23_#13I_Col_1_a	1	13	NA	NA	NA	NA	191	226	NA	NA	NA	NA	NA	NA	19.03.2019	EDM
Shakespeare Cliff Basal Sand Shellbed	1624	23	13	INT	SCBSSB_23_#13I_Col_1_a	1	5	NA	NA	NA	NA	173	238	NA	NA	NA	NA	NA	NA	19.03.2019	EDM
Shakespeare Cliff Basal Sand Shellbed	1625	23	13	INT	SCBSSB_23_#13I_Col_1_a	1	6	NA	NA	NA	NA	182	219	NA	NA	NA	NA	NA	NA	19.03.2019	EDM
Shakespeare Cliff Basal Sand Shellbed	1626	23	13	INT	SCBSSB_23_#13I_Col_1_a	1	7	NA	NA	NA	NA	167	226	NA	NA	NA	NA	NA	NA	19.03.2019	EDM
Shakespeare Cliff Basal Sand Shellbed	1627	23	13	INT	SCBSSB_23_#13I_Col_1_a	1	10	NA	NA	NA	NA	155	202	NA	NA	NA	NA	NA	NA	19.03.2019	EDM
Shakespeare Cliff Basal Sand Shellbed	1628	23	13	INT	SCBSSB_23_#13I_Col_1_a	1	1	NA	NA	NA	NA	182	263	NA	NA	NA	NA	NA	NA	19.03.2019	EDM
Shakespeare Cliff Basal Sand Shellbed	1629	23	13	INT	SCBSSB_23_#13I_Col_1_a	1	2	NA	NA	NA	NA	173	226	NA	NA	NA	NA	NA	NA	19.03.2019	EDM
Shakespeare Cliff Basal Sand Shellbed	1630	23	13	INT	SCBSSB_23_#13I_Col_1_a	1	3	NA	NA	NA	NA	156	238	NA	NA	NA	NA	NA	NA	19.03.2019	EDM
Shakespeare Cliff Basal Sand Shellbed	1631	23	13	INT	SCBSSB_23_#13I_Col_1_a	1	4	NA	NA	NA	NA	184	227	NA	NA	NA	NA	NA	NA	19.03.2019	EDM
Shakespeare Cliff Basal Sand Shellbed	1632	23	13	INT	SCBSSB_23_#13I_Col_1_a	1	12	NA	NA	NA	NA	184	218	NA	NA	NA	NA	NA	NA	19.03.2019	EDM
Shakespeare Cliff Basal Sand Shellbed	1633	23	13	INT	SCBSSB_23_#13I_Col_1_a	1	35	464	241	NA	NA	NA	NA	NA	NA	NA	NA	NA	NA	19.03.2019	EDM
Shakespeare Cliff Basal Sand Shellbed	1634	23	13	INT	SCBSSB_23_#13I_Col_1_a	1	36	461	194	NA	NA	NA	NA	NA	NA	NA	NA	NA	NA	19.03.2019	EDM
Shakespeare Cliff Basal Sand Shellbed	1635	23	13	INT	SCBSSB_23_#13I_Col_1_a	1	43	565	186	NA	NA	NA	NA	NA	NA	NA	NA	NA	NA	19.03.2019	EDM
Shakespeare Cliff Basal Sand Shellbed	1636	23	13	INT	SCBSSB_23_#13I_Col_1_a	1	58	553	250	NA	NA	NA	NA	NA	NA	NA	NA	NA	NA	19.03.2019	EDM
Shakespeare Cliff Basal Sand Shellbed	1637	23	13	INT	SCBSSB_23_#13I_Col_1_a	1	45	427	193	NA	NA	NA	NA	NA	NA	NA	NA	NA	NA	19.03.2019	EDM
Shakespeare Cliff Basal Sand Shellbed	1638	23	13	INT	SCBSSB_23_#13I_Col_1_a	1	20	NA	NA	NA	NA	NA	NA	NA	NA	444	153	NA	NA	19.03.2019	EDM
Shakespeare Cliff Basal Sand Shellbed	1639	23	13	INT	SCBSSB_23_#13I_Col_1_a	1	15	NA	NA	NA	NA	NA	NA	NA	NA	334	219	NA	NA	19.03.2019	EDM
Shakespeare Cliff Basal Sand Shellbed	1640	23	13	INT	SCBSSB_23_#13I_Col_1_a	1	16	NA	NA	NA	NA	NA	NA	NA	NA	315	198	NA	NA	19.03.2019	EDM
Shakespeare Cliff Basal Sand Shellbed	1641	23	13	INT	SCBSSB_23_#13I_Col_2_a	2	8	NA	NA	NA	NA	172	232	NA	NA	NA	NA	NA	NA	19.03.2019	EDM
Shakespeare Cliff Basal Sand Shellbed	1642	23	13	INT	SCBSSB_23_#13I_Col_2_a	2	10	NA	NA	NA	NA	163	210	NA	NA	NA	NA	NA	NA	19.03.2019	EDM
Shakespeare Cliff Basal Sand Shellbed	1643	23	13	INT	SCBSSB_23_#13I_Col_2_a	2	14	NA	NA	NA	NA	185	225	NA	NA	NA	NA	NA	NA	19.03.2019	EDM
Shakespeare Cliff Basal Sand Shellbed	1644	23	13	INT	SCBSSB_23_#13I_Col_2_a	2	13	NA	NA	NA	NA	207	228	NA	NA	NA	NA	NA	NA	19.03.2019	EDM
Shakespeare Cliff Basal Sand Shellbed	1645	23	13	INT	SCBSSB_23_#13I_Col_2_a	2	11	NA	NA	NA	NA	206	223	46	88	NA	NA	NA	NA	19.03.2019	EDM
Shakespeare Cliff Basal Sand Shellbed	1646	23	13	INT	SCBSSB_23_#13I_Col_2_a	2	6	NA	NA	NA	NA	174	256	NA	NA	NA	NA	NA	NA	19.03.2019	EDM
Shakespeare Cliff Basal Sand Shellbed	1647	23	13	INT	SCBSSB_23_#13I_Col_2_a	2	5	NA	NA	NA	NA	165	252	NA	NA	NA	NA	NA	NA	19.03.2019	EDM
Shakespeare Cliff Basal Sand Shellbed	1648	23	13	INT	SCBSSB_23_#13I_Col_2_a	2	4	NA	NA	NA	NA	188	224	NA	NA	NA	NA	NA	NA	19.03.2019	EDM
Shakespeare Cliff Basal Sand Shellbed	1649	23	13	INT	SCBSSB_23_#13I_Col_2_a	2	1	NA	NA	NA	NA	195	242	NA	NA	NA	NA	NA	NA	19.03.2019	EDM
Shakespeare Cliff Basal Sand Shellbed	1650	23	13	INT	SCBSSB_23_#13I_Col_2_a	2	22	458	208	NA	NA	NA	NA	NA	NA	NA	NA	NA	NA	19.03.2019	EDM
Shakespeare Cliff Basal Sand Shellbed	1651	23	13	INT	SCBSSB_23_#13I_Col_2_a	2	49	473	194	NA	NA	NA	NA	NA	NA	NA	NA	NA	NA	19.03.2019	EDM
Shakespeare Cliff Basal Sand Shellbed	1652	23	13	INT	SCBSSB_23_#13I_Col_2_a	2	32	488	193	NA	NA	NA	NA	NA	NA	NA	NA	NA	NA	19.03.2019	EDM
Shakespeare Cliff Basal Sand Shellbed	1653	23	13	INT	SCBSSB_23_#13I_Col_2_a	2	29	419	206	NA	NA	NA	NA	NA	NA	NA	NA	NA	NA	19.03.2019	EDM
Shakespeare Cliff Basal Sand Shellbed	1654	23	13	INT	SCBSSB_23_#13I_Col_2_a	2	30	471	206	NA	NA	NA	NA	NA	NA	NA	NA	NA	NA	19.03.2019	EDM
Shakespeare Cliff Basal Sand Shellbed	1655	23	13	INT	SCBSSB_23_#13I_Col_2_a	2	31	526	222	NA	NA	NA	NA	NA	NA	NA	NA	NA	NA	19.03.2019	EDM
Shakespeare Cliff Basal Sand Shellbed	1656	23	13	INT	SCBSSB_23_#13I_Col_2_a	2	18	NA	NA	NA	NA	NA	NA	NA	NA	374	177	NA	NA	19.03.2019	EDM
Shakespeare Cliff Basal Sand Shellbed	1657	23	13	INT	SCBSSB_23_#13I_Col_3_a	3	11	NA	NA	NA	NA	205	219	NA	NA	NA	NA	NA	NA	19.03.2019	EDM
Shakespeare Cliff Basal Sand Shellbed	1658	23	13	INT	SCBSSB_23_#13I_Col_3_a	3	12	NA	NA	NA	NA	205	225	NA	NA	NA	NA	NA	NA	19.03.2019	EDM
Shakespeare Cliff Basal Sand Shellbed	1659	23	13	INT	SCBSSB_23_#13I_Col_3_a	3	9	NA	NA	NA	NA	197	220	NA	NA	NA	NA	NA	NA	19.03.2019	EDM
Shakespeare Cliff Basal Sand Shellbed	1660	23	13	INT	SCBSSB_23_#13I_Col_3_a	3	5	NA	NA	NA	NA	185	251	NA	NA	NA	NA	NA	NA	19.03.2019	EDM
Shakespeare Cliff Basal Sand Shellbed	1661	23	13	INT	SCBSSB_23_#13I_Col_3_a	3	10	NA	NA	NA	NA	207	219	NA	NA	NA	NA	NA	NA	19.03.2019	EDM
Shakespeare Cliff Basal Sand Shellbed	1662	23	13	INT	SCBSSB_23_#13I_Col_3_a	3	13	NA	NA	NA	NA	191	229	NA	NA	NA	NA	NA	NA	19.03.2019	EDM
Shakespeare Cliff Basal Sand Shellbed	1663	23	13	INT	SCBSSB_23_#13I_Col_3_a	3	14	NA	NA	NA	NA	224	226	NA	NA	NA	NA	NA	NA	19.03.2019	EDM
Shakespeare Cliff Basal Sand Shellbed	1664	23	13	INT	SCBSSB_23_#13I_Col_3_a	3	15	NA	NA	NA	NA	199	213	NA	NA	NA	NA	NA	NA	19.03.2019	EDM
Shakespeare Cliff Basal Sand Shellbed	1665	23	13	INT	SCBSSB_23_#13I_Col_3_a	3	8	NA	NA	NA	NA	201	256	NA	NA	NA	NA	NA	NA	19.03.2019	EDM
Shakespeare Cliff Basal Sand Shellbed	1666	23	13	INT	SCBSSB_23_#13I_Col_3_a	3	7	NA	NA	NA	NA	203	232	NA	NA	NA	NA	NA	NA	19.03.2019	EDM
Shakespeare Cliff Basal Sand Shellbed	1667	23	13	INT	SCBSSB_23_#13I_Col_3_a	3	6	NA	NA	NA	NA	189	266	NA	NA	NA	NA	NA	NA	19.03.2019	EDM
Shakespeare Cliff Basal Sand Shellbed	1668	23	13	INT	SCBSSB_23_#13I_Col_3_a	3	1	NA	NA	NA	NA	211	235	NA	NA	NA	NA	NA	NA	19.03.2019	EDM
Shakespeare Cliff Basal Sand Shellbed	1669	23	13	INT	SCBSSB_23_#13I_Col_3_a	3	2	NA	NA	NA	NA	203	215	NA	NA	NA	NA	NA	NA	19.03.2019	EDM
Shakespeare Cliff Basal Sand Shellbed	1670	23	13	INT	SCBSSB_23_#13I_Col_3_a	3	3	NA	NA	NA	NA	178	215	NA	NA	NA	NA	NA	NA	19.03.2019	EDM
Shakespeare Cliff Basal Sand Shellbed	1671	23	13	INT	SCBSSB_23_#13I_Col_3_a	3	4	NA	NA	NA	NA	195	231	NA	NA	NA	NA	NA	NA	19.03.2019	EDM
Shakespeare Cliff Basal Sand Shellbed	1672	23	13	INT	SCBSSB_23_#13I_Col_3_a	3	31	494	197	NA	NA	NA	NA	NA	NA	NA	NA	NA	NA	19.03.2019	EDM
Shakespeare Cliff Basal Sand Shellbed	1673	23	13	INT	SCBSSB_23_#13I_Col_3_a	3	35	528	199	NA	NA	NA	NA	NA	NA	NA	NA	NA	NA	19.03.2019	EDM
Shakespeare Cliff Basal Sand Shellbed	1674	23	13	INT	SCBSSB_23_#13I_Col_3_a	3	36	488	168	NA	NA	NA	NA	NA	NA	NA	NA	NA	NA	19.03.2019	EDM
Shakespeare Cliff Basal Sand Shellbed	1675	23	13	INT	SCBSSB_23_#13I_Col_3_a	3	18	NA	NA	NA	NA	NA	NA	NA	NA	393	146	NA	NA	19.03.2019	EDM
Shakespeare Cliff Basal Sand Shellbed	1676	23	13	INT	SCBSSB_23_#13I_Col_4_a	4	2	NA	NA	NA	NA	179	203	NA	NA	NA	NA	NA	NA	19.03.2019	EDM
Shakespeare Cliff Basal Sand Shellbed	1677	23	13	INT	SCBSSB_23_#13I_Col_4_a	4	3	NA	NA	NA	NA	193	196	NA	NA	NA	NA	NA	NA	19.03.2019	EDM
Shakespeare Cliff Basal Sand Shellbed	1678	23	13	INT	SCBSSB_23_#13I_Col_4_a	4	1	NA	NA	NA	NA	167	202	NA	NA	NA	NA	NA	NA	19.03.2019	EDM
Shakespeare Cliff Basal Sand Shellbed	1679	23	13	INT	SCBSSB_23_#13I_Col_4_a	4	37	451	210	NA	NA	NA	NA	NA	NA	NA	NA	NA	NA	19.03.2019	EDM
Shakespeare Cliff Basal Sand Shellbed	1680	23	13	INT	SCBSSB_23_#13I_Col_4_a	4	51	441	220	NA	NA	NA	NA	NA	NA	NA	NA	NA	NA	19.03.2019	EDM
Shakespeare Cliff Basal Sand Shellbed	1681	23	13	INT	SCBSSB_23_#13I_Col_4_a	4	29	432	220	NA	NA	NA	NA	NA	NA	NA	NA	NA	NA	19.03.2019	EDM
Shakespeare Cliff Basal Sand Shellbed	1682	23	13	INT	SCBSSB_23_#13I_Col_4_a	4	38	471	197	NA	NA	NA	NA	NA	NA	NA	NA	NA	NA	19.03.2019	EDM
Shakespeare Cliff Basal Sand Shellbed	1683	23	13	INT	SCBSSB_23_#13I_Col_4_a	4	43	518	210	NA	NA	NA	NA	NA	NA	NA	NA	NA	NA	19.03.2019	EDM
Shakespeare Cliff Basal Sand Shellbed	1684	23	13	INT	SCBSSB_23_#13I_Col_4_a	4	34	503	216	NA	NA	NA	NA	NA	NA	NA	NA	NA	NA	19.03.2019	EDM
Shakespeare Cliff Basal Sand Shellbed	1685	23	13	INT	SCBSSB_23_#13I_Col_4_a	4	7	NA	NA	NA	NA	NA	NA	NA	NA	319	181	NA	NA	19.03.2019	EDM
Shakespeare Cliff Basal Sand Shellbed	1686	23	13	INT	SCBSSB_23_#13I_Col_4_a	4	6	NA	NA	NA	NA	NA	NA	NA	NA	339	163	NA	NA	19.03.2019	EDM
Shakespeare Cliff Basal Sand Shellbed	1687	23	13	INT	SCBSSB_23_#13I_Col_4_a	4	9	NA	NA	NA	NA	NA	NA	NA	NA	240	242	NA	NA	19.03.2019	EDM
Shakespeare Cliff Basal Sand Shellbed	1688	23	17	INT	SCBSSB_23_#17I_Col_1_a	1	7	NA	NA	NA	NA	191	238	44	80	NA	NA	NA	NA	19.03.2019	EDM
Shakespeare Cliff Basal Sand Shellbed	1689	23	17	INT	SCBSSB_23_#17I_Col_1_a	1	6	NA	NA	NA	NA	186	214	52	90	NA	NA	NA	NA	19.03.2019	EDM
Shakespeare Cliff Basal Sand Shellbed	1690	23	17	INT	SCBSSB_23_#17I_Col_1_a	1	3	NA	NA	NA	NA	184	244	NA	NA	NA	NA	NA	NA	19.03.2019	EDM
Shakespeare Cliff Basal Sand Shellbed	1691	23	17	INT	SCBSSB_23_#17I_Col_1_a	1	4	NA	NA	NA	NA	179	222	NA	NA	NA	NA	NA	NA	19.03.2019	EDM
Shakespeare Cliff Basal Sand Shellbed	1692	23	17	INT	SCBSSB_23_#17I_Col_1_a	1	16	NA	NA	NA	NA	182	250	NA	NA	NA	NA	NA	NA	19.03.2019	EDM
Shakespeare Cliff Basal Sand Shellbed	1693	23	17	INT	SCBSSB_23_#17I_Col_1_a	1	2	NA	NA	NA	NA	182	233	NA	NA	NA	NA	NA	NA	19.03.2019	EDM
Shakespeare Cliff Basal Sand Shellbed	1694	29	8	INT	SCBSSB_29_#8I_Col_1_a	1	5	NA	NA	NA	NA	172	237	NA	NA	NA	NA	NA	NA	19.03.2019	EDM
Shakespeare Cliff Basal Sand Shellbed	1695	29	8	INT	SCBSSB_29_#8I_Col_1_a	1	2	NA	NA	NA	NA	166	261	46	100	NA	NA	NA	NA	19.03.2019	EDM
Shakespeare Cliff Basal Sand Shellbed	1696	29	8	INT	SCBSSB_29_#8I_Col_1_a	1	6	NA	NA	NA	NA	157	235	NA	NA	NA	NA	NA	NA	19.03.2019	EDM
Shakespeare Cliff Basal Sand Shellbed	1697	29	8	INT	SCBSSB_29_#8I_Col_1_a	1	1	NA	NA	NA	NA	153	254	NA	NA	NA	NA	NA	NA	19.03.2019	EDM
Shakespeare Cliff Basal Sand Shellbed	1698	29	8	INT	SCBSSB_29_#8I_Col_1_a	1	11	NA	NA	NA	NA	NA	NA	NA	NA	337	234	NA	NA	19.03.2019	EDM
Shakespeare Cliff Basal Sand Shellbed	1699	29	8	INT	SCBSSB_29_#8I_Col_1_a	1	12	NA	NA	NA	NA	NA	NA	NA	NA	335	237	NA	NA	19.03.2019	EDM
Shakespeare Cliff Basal Sand Shellbed	1700	29	8	INT	SCBSSB_29_#8I_Col_1_a	1	10	NA	NA	NA	NA	NA	NA	NA	NA	279	224	NA	NA	19.03.2019	EDM
Shakespeare Cliff Basal Sand Shellbed	1701	29	8	INT	SCBSSB_29_#8I_Col_1_a	1	8	NA	NA	NA	NA	NA	NA	NA	NA	373	272	NA	NA	19.03.2019	EDM
Shakespeare Cliff Basal Sand Shellbed	1702	29	8	INT	SCBSSB_29_#8I_Col_1_a	1	17	NA	NA	NA	NA	NA	NA	NA	NA	377	138	NA	NA	19.03.2019	EDM
Shakespeare Cliff Basal Sand Shellbed	1703	29	8	INT	SCBSSB_29_#8I_Col_1_a	1	7	NA	NA	NA	NA	NA	NA	NA	NA	402	205	NA	NA	19.03.2019	EDM
Shakespeare Cliff Basal Sand Shellbed	1704	29	8	INT	SCBSSB_29_#8I_Col_1_a	1	29	450	245	NA	NA	NA	NA	NA	NA	NA	NA	NA	NA	19.03.2019	EDM
Shakespeare Cliff Basal Sand Shellbed	1705	29	8	INT	SCBSSB_29_#8I_Col_1_a	1	43	426	251	NA	NA	NA	NA	NA	NA	NA	NA	NA	NA	19.03.2019	EDM
Shakespeare Cliff Basal Sand Shellbed	1706	29	8	INT	SCBSSB_29_#8I_Col_1_a	1	44	516	250	NA	NA	NA	NA	NA	NA	NA	NA	NA	NA	19.03.2019	EDM
Shakespeare Cliff Basal Sand Shellbed	1707	29	8	INT	SCBSSB_29_#8I_Col_1_a	1	45	523	250	NA	NA	NA	NA	NA	NA	NA	NA	NA	NA	19.03.2019	EDM
Shakespeare Cliff Basal Sand Shellbed	1708	29	8	INT	SCBSSB_29_#8I_Col_1_a	1	20	483	248	NA	NA	NA	NA	NA	NA	NA	NA	NA	NA	19.03.2019	EDM
Shakespeare Cliff Basal Sand Shellbed	1709	29	15	INT	SCBSSB_29_#15I_Col_1_b	1	2	NA	NA	NA	NA	179	232	NA	NA	NA	NA	NA	NA	19.03.2019	EDM
Shakespeare Cliff Basal Sand Shellbed	1710	29	15	INT	SCBSSB_29_#15I_Col_1_b	1	3	NA	NA	NA	NA	160	223	NA	NA	NA	NA	NA	NA	19.03.2019	EDM
Shakespeare Cliff Basal Sand Shellbed	1711	29	15	INT	SCBSSB_29_#15I_Col_1_b	1	12	NA	NA	NA	NA	NA	NA	NA	NA	273	209	NA	NA	19.03.2019	EDM
Nukumaru Brown Sand	1712	9.6	24	INT	NKBS_9.6_#24I_Col_2_c	2	1	NA	NA	NA	NA	191	207	NA	NA	NA	NA	NA	NA	25.03.2019	EDM
Nukumaru Brown Sand	1713	9.6	24	INT	NKBS_9.6_#24I_Col_2_c	2	9	NA	NA	NA	NA	186	214	NA	NA	NA	NA	NA	NA	25.03.2019	EDM
Nukumaru Brown Sand	1714	9.6	24	INT	NKBS_9.6_#24I_Col_2_c	2	6	NA	NA	NA	NA	165	212	NA	NA	NA	NA	NA	NA	25.03.2019	EDM
Nukumaru Brown Sand	1715	9.6	24	INT	NKBS_9.6_#24I_Col_2_c	2	2	NA	NA	NA	NA	174	189	NA	NA	NA	NA	NA	NA	25.03.2019	EDM
Nukumaru Brown Sand	1716	9.6	24	INT	NKBS_9.6_#24I_Col_2_c	2	3	NA	NA	NA	NA	185	217	NA	NA	NA	NA	NA	NA	25.03.2019	EDM
Nukumaru Brown Sand	1717	9.6	24	INT	NKBS_9.6_#24I_Col_2_c	2	4	NA	NA	NA	NA	189	217	NA	NA	NA	NA	NA	NA	25.03.2019	EDM
Nukumaru Brown Sand	1718	9.6	24	INT	NKBS_9.6_#24I_Col_2_b	2	3	NA	NA	NA	NA	181	235	NA	NA	NA	NA	NA	NA	25.03.2019	EDM
Nukumaru Brown Sand	1719	9.6	24	INT	NKBS_9.6_#24I_Col_2_b	2	46	449	205	NA	NA	NA	NA	NA	NA	NA	NA	NA	NA	25.03.2019	EDM
Nukumaru Brown Sand	1720	9.6	24	INT	NKBS_9.6_#24I_Col_2_b	2	12	NA	NA	NA	NA	NA	NA	NA	NA	290	170	NA	NA	25.03.2019	EDM
Nukumaru Brown Sand	1721	9.6	24	INT	NKBS_9.6_#24I_Col_2_b	2	26	415	200	NA	NA	NA	NA	NA	NA	NA	NA	NA	NA	25.03.2019	EDM
Nukumaru Brown Sand	1722	9.6	24	INT	NKBS_9.6_#24I_Col_2_b	2	25	471	181	NA	NA	NA	NA	NA	NA	NA	NA	NA	NA	25.03.2019	EDM
Nukumaru Brown Sand	1723	9.6	24	INT	NKBS_9.6_#24I_Col_2_a	2	6	NA	NA	NA	NA	182	218	NA	NA	NA	NA	NA	NA	25.03.2019	EDM
Nukumaru Brown Sand	1724	9.6	24	INT	NKBS_9.6_#24I_Col_2_a	2	3	NA	NA	NA	NA	181	236	NA	NA	NA	NA	NA	NA	25.03.2019	EDM
Nukumaru Brown Sand	1725	9.6	24	INT	NKBS_9.6_#24I_Col_2_a	2	7	NA	NA	NA	NA	207	240	NA	NA	NA	NA	NA	NA	25.03.2019	EDM
Nukumaru Brown Sand	1726	9.6	24	INT	NKBS_9.6_#24I_Col_2_a	2	35	415	168	NA	NA	NA	NA	NA	NA	NA	NA	NA	NA	25.03.2019	EDM
Nukumaru Brown Sand	1727	9.6	24	INT	NKBS_9.6_#24I_Col_2_a	2	36	460	181	NA	NA	NA	NA	NA	NA	NA	NA	NA	NA	25.03.2019	EDM
Nukumaru Brown Sand	1728	9.6	24	INT	NKBS_9.6_#24I_Col_2_a	2	24	482	198	NA	NA	NA	NA	NA	NA	NA	NA	NA	NA	25.03.2019	EDM
Nukumaru Brown Sand	1729	9.6	24	INT	NKBS_9.6_#24I_Col_2_a	2	32	572	221	NA	NA	NA	NA	NA	NA	NA	NA	NA	NA	25.03.2019	EDM
Nukumaru Brown Sand	1730	9.6	24	INT	NKBS_9.6_#24I_Col_2_a	2	41	467	198	NA	NA	NA	NA	NA	NA	NA	NA	NA	NA	25.03.2019	EDM
Nukumaru Brown Sand	1731	9.6	25	INT	NKBS_9.6_#25I_Col_9_a	9	2	NA	NA	NA	NA	163	225	NA	NA	NA	NA	NA	NA	25.03.2019	EDM
Nukumaru Brown Sand	1732	9.6	25	INT	NKBS_9.6_#25I_Col_9_a	9	1	NA	NA	NA	NA	195	237	NA	NA	NA	NA	NA	NA	25.03.2019	EDM
Nukumaru Brown Sand	1733	9.6	25	INT	NKBS_9.6_#25I_Col_9_a	9	3	NA	NA	NA	NA	138	243	NA	NA	NA	NA	NA	NA	25.03.2019	EDM
Nukumaru Brown Sand	1734	9.6	25	INT	NKBS_9.6_#25I_Col_9_a	9	6	NA	NA	NA	NA	NA	NA	NA	NA	280	179	NA	NA	25.03.2019	EDM
Nukumaru Brown Sand	1735	9.6	25	INT	NKBS_9.6_#25I_Col_9_a	9	28	472	188	NA	NA	NA	NA	NA	NA	NA	NA	NA	NA	25.03.2019	EDM
Nukumaru Brown Sand	1736	9.6	25	INT	NKBS_9.6_#25I_Col_9_a	9	27	457	200	NA	NA	NA	NA	NA	NA	NA	NA	NA	NA	25.03.2019	EDM
Nukumaru Brown Sand	1737	9.6	25	INT	NKBS_9.6_#25I_Col_9_a	9	15	443	206	NA	NA	NA	NA	NA	NA	NA	NA	NA	NA	25.03.2019	EDM
Nukumaru Brown Sand	1738	9.6	25	INT	NKBS_9.6_#25I_Col_9_a	9	19	493	207	NA	NA	NA	NA	NA	NA	NA	NA	NA	NA	25.03.2019	EDM
Nukumaru Brown Sand	1739	9.6	25	INT	NKBS_9.6_#25I_Col_9_a	9	20	453	231	NA	NA	NA	NA	NA	NA	NA	NA	NA	NA	25.03.2019	EDM
Nukumaru Brown Sand	1740	9.6	22	EXT	NKBS_9.6_#22E_Col_1_a	1	2	NA	NA	NA	NA	205	226	NA	NA	NA	NA	NA	NA	25.03.2019	EDM
Nukumaru Brown Sand	1741	9.6	22	EXT	NKBS_9.6_#22E_Col_1_a	1	1	NA	NA	NA	NA	166	215	NA	NA	NA	NA	NA	NA	25.03.2019	EDM
Nukumaru Brown Sand	1742	9.6	22	EXT	NKBS_9.6_#22E_Col_1_a	1	16	NA	NA	NA	NA	180	234	NA	NA	NA	NA	NA	NA	25.03.2019	EDM
Nukumaru Brown Sand	1743	9.6	22	EXT	NKBS_9.6_#22E_Col_1_a	1	19	NA	NA	NA	NA	171	226	NA	NA	NA	NA	NA	NA	25.03.2019	EDM
Nukumaru Brown Sand	1744	9.6	22	EXT	NKBS_9.6_#22E_Col_1_a	1	20	NA	NA	NA	NA	181	227	47	77	NA	NA	NA	NA	25.03.2019	EDM
Nukumaru Brown Sand	1745	9.6	22	EXT	NKBS_9.6_#22E_Col_1_a	1	18	NA	NA	NA	NA	197	252	46	77	NA	NA	NA	NA	25.03.2019	EDM
Nukumaru Brown Sand	1746	9.6	22	EXT	NKBS_9.6_#22E_Col_1_a	1	14	NA	NA	NA	NA	193	240	NA	NA	NA	NA	NA	NA	25.03.2019	EDM
Nukumaru Brown Sand	1747	9.6	22	EXT	NKBS_9.6_#22E_Col_1_a	1	15	NA	NA	NA	NA	187	250	NA	NA	NA	NA	NA	NA	25.03.2019	EDM
Nukumaru Brown Sand	1748	9.6	22	EXT	NKBS_9.6_#22E_Col_1_a	1	3	NA	NA	NA	NA	193	176	NA	NA	NA	NA	NA	NA	25.03.2019	EDM
Nukumaru Brown Sand	1749	9.6	22	EXT	NKBS_9.6_#22E_Col_1_a	1	4	NA	NA	NA	NA	164	209	NA	NA	NA	NA	NA	NA	25.03.2019	EDM
Nukumaru Brown Sand	1750	9.6	22	EXT	NKBS_9.6_#22E_Col_1_a	1	5	NA	NA	NA	NA	167	219	NA	NA	NA	NA	NA	NA	25.03.2019	EDM
Nukumaru Brown Sand	1751	9.6	22	EXT	NKBS_9.6_#22E_Col_1_a	1	13	NA	NA	NA	NA	173	191	NA	NA	NA	NA	NA	NA	25.03.2019	EDM
Nukumaru Brown Sand	1752	9.6	22	EXT	NKBS_9.6_#22E_Col_1_a	1	11	NA	NA	NA	NA	184	231	NA	NA	NA	NA	NA	NA	25.03.2019	EDM
Nukumaru Brown Sand	1753	9.6	22	EXT	NKBS_9.6_#22E_Col_1_a	1	12	NA	NA	NA	NA	205	213	NA	NA	NA	NA	NA	NA	25.03.2019	EDM
Nukumaru Brown Sand	1754	9.6	22	EXT	NKBS_9.6_#22E_Col_1_a	1	23	NA	NA	NA	NA	170	237	NA	NA	NA	NA	NA	NA	25.03.2019	EDM
Nukumaru Brown Sand	1755	9.6	22	EXT	NKBS_9.6_#22E_Col_1_a	1	21	NA	NA	NA	NA	171	217	NA	NA	NA	NA	NA	NA	25.03.2019	EDM
Nukumaru Brown Sand	1756	9.6	22	EXT	NKBS_9.6_#22E_Col_1_a	1	31	410	180	NA	NA	NA	NA	NA	NA	NA	NA	NA	NA	25.03.2019	EDM
Nukumaru Brown Sand	1757	9.6	22	EXT	NKBS_9.6_#22E_Col_1_a	1	39	487	196	NA	NA	NA	NA	NA	NA	NA	NA	NA	NA	25.03.2019	EDM
Nukumaru Brown Sand	1758	9.6	22	EXT	NKBS_9.6_#22E_Col_1_a	1	30	385	180	NA	NA	NA	NA	NA	NA	NA	NA	NA	NA	25.03.2019	EDM
Nukumaru Brown Sand	1759	9.6	22	EXT	NKBS_9.6_#22E_Col_1_a	1	44	491	166	NA	NA	NA	NA	NA	NA	NA	NA	NA	NA	25.03.2019	EDM
Nukumaru Brown Sand	1760	9.6	22	EXT	NKBS_9.6_#22E_Col_1_a	1	33	495	166	NA	NA	NA	NA	NA	NA	NA	NA	NA	NA	25.03.2019	EDM
Nukumaru Brown Sand	1761	9.6	22	EXT	NKBS_9.6_#22E_Col_1_a	1	24	NA	NA	NA	NA	NA	NA	NA	NA	337	177	NA	NA	25.03.2019	EDM
Nukumaru Brown Sand	1762	9.6	18	EXT	NKBS_9.6_#18E_Col_2_a	2	38	391	217	NA	NA	NA	NA	NA	NA	NA	NA	NA	NA	25.03.2019	EDM
Nukumaru Brown Sand	1763	9.6	18	EXT	NKBS_9.6_#18E_Col_2_a	2	39	351	194	NA	NA	NA	NA	NA	NA	NA	NA	NA	NA	25.03.2019	EDM
Nukumaru Brown Sand	1764	9.6	18	EXT	NKBS_9.6_#18E_Col_2_a	2	35	376	224	NA	NA	NA	NA	NA	NA	NA	NA	NA	NA	25.03.2019	EDM
Nukumaru Brown Sand	1765	9.6	18	EXT	NKBS_9.6_#18E_Col_2_a	2	36	484	169	NA	NA	NA	NA	NA	NA	NA	NA	NA	NA	25.03.2019	EDM
Nukumaru Brown Sand	1766	9.6	18	EXT	NKBS_9.6_#18E_Col_2_a	2	23	422	204	NA	NA	NA	NA	NA	NA	NA	NA	NA	NA	25.03.2019	EDM
Nukumaru Brown Sand	1767	9.6	18	EXT	NKBS_9.6_#18E_Col_2_a	2	21	502	200	NA	NA	NA	NA	NA	NA	NA	NA	NA	NA	25.03.2019	EDM
Nukumaru Brown Sand	1768	9.6	18	EXT	NKBS_9.6_#18E_Col_2_a	2	16	454	201	NA	NA	NA	NA	NA	NA	NA	NA	NA	NA	25.03.2019	EDM
Nukumaru Brown Sand	1769	9.6	18	EXT	NKBS_9.6_#18E_Col_2_a	2	41	387	208	NA	NA	NA	NA	NA	NA	NA	NA	NA	NA	25.03.2019	EDM
Nukumaru Brown Sand	1770	9.6	18	EXT	NKBS_9.6_#18E_Col_2_a	2	43	437	187	NA	NA	NA	NA	NA	NA	NA	NA	NA	NA	25.03.2019	EDM
Nukumaru Brown Sand	1771	9.6	18	EXT	NKBS_9.6_#18E_Col_2_a	2	11	NA	NA	NA	NA	NA	NA	NA	NA	306	214	NA	NA	25.03.2019	EDM
Nukumaru Brown Sand	1772	9.6	18	EXT	NKBS_9.6_#18E_Col_2_a	2	10	NA	NA	NA	NA	NA	NA	NA	NA	248	194	NA	NA	25.03.2019	EDM
Nukumaru Brown Sand	1773	9.6	18	EXT	NKBS_9.6_#18E_Col_2_a	2	6	NA	NA	NA	NA	NA	NA	NA	NA	347	228	NA	NA	25.03.2019	EDM
Nukumaru Brown Sand	1774	9.6	18	EXT	NKBS_9.6_#18E_Col_2_a	2	5	NA	NA	NA	NA	NA	NA	NA	NA	325	189	NA	NA	25.03.2019	EDM
Nukumaru Brown Sand	1775	9.6	18	EXT	NKBS_9.6_#18E_Col_2_a	2	14	NA	NA	NA	NA	NA	NA	NA	NA	275	234	NA	NA	25.03.2019	EDM
Nukumaru Brown Sand	1776	9.6	18	EXT	NKBS_9.6_#18E_Col_2_a	2	7	NA	NA	NA	NA	NA	NA	NA	NA	335	153	NA	NA	25.03.2019	EDM
Nukumaru Brown Sand	1777	9.6	18	EXT	NKBS_9.6_#18E_Col_2_a	2	9	NA	NA	NA	NA	NA	NA	NA	NA	281	219	NA	NA	25.03.2019	EDM
Nukumaru Brown Sand	1778	9.6	18	EXT	NKBS_9.6_#18E_Col_2_a	2	2	NA	NA	NA	NA	NA	NA	NA	NA	275	185	NA	NA	25.03.2019	EDM
Nukumaru Brown Sand	1779	9.6	18	EXT	NKBS_9.6_#18E_Col_2_a	2	32	411	176	NA	NA	NA	NA	NA	NA	NA	NA	NA	NA	25.03.2019	EDM
Nukumaru Brown Sand	1780	9.6	18	EXT	NKBS_9.6_#18E_Col_4	4	49	485	218	NA	NA	NA	NA	NA	NA	NA	NA	NA	NA	25.03.2019	EDM
Nukumaru Brown Sand	1781	9.6	18	EXT	NKBS_9.6_#18E_Col_4	4	48	452	197	NA	NA	NA	NA	NA	NA	NA	NA	NA	NA	25.03.2019	EDM
Nukumaru Brown Sand	1782	9.6	18	EXT	NKBS_9.6_#18E_Col_4	4	47	351	213	NA	NA	NA	NA	NA	NA	NA	NA	NA	NA	25.03.2019	EDM
Nukumaru Brown Sand	1783	9.6	18	EXT	NKBS_9.6_#18E_Col_4	4	50	400	165	NA	NA	NA	NA	NA	NA	NA	NA	NA	NA	25.03.2019	EDM
Nukumaru Brown Sand	1784	9.6	18	EXT	NKBS_9.6_#18E_Col_4	4	51	367	235	NA	NA	NA	NA	NA	NA	NA	NA	NA	NA	25.03.2019	EDM
Nukumaru Brown Sand	1785	9.6	18	EXT	NKBS_9.6_#18E_Col_4	4	18	376	188	NA	NA	NA	NA	NA	NA	NA	NA	NA	NA	25.03.2019	EDM
Nukumaru Brown Sand	1786	9.6	18	EXT	NKBS_9.6_#18E_Col_4	4	19	418	196	NA	NA	NA	NA	NA	NA	NA	NA	NA	NA	25.03.2019	EDM
Nukumaru Brown Sand	1787	9.6	18	EXT	NKBS_9.6_#18E_Col_4	4	7	NA	NA	NA	NA	NA	NA	NA	NA	353	215	NA	NA	25.03.2019	EDM
Nukumaru Brown Sand	1788	9.6	18	EXT	NKBS_9.6_#18E_Col_4	4	8	NA	NA	NA	NA	NA	NA	NA	NA	297	160	NA	NA	25.03.2019	EDM
Nukumaru Brown Sand	1789	9.6	18	EXT	NKBS_9.6_#18E_Col_4	4	1	NA	NA	NA	NA	NA	NA	NA	NA	242	177	NA	NA	25.03.2019	EDM
Nukumaru Brown Sand	1790	9.6	18	EXT	NKBS_9.6_#18E_Col_1_c	1	1	NA	NA	NA	NA	162	182	30	73	NA	NA	NA	NA	25.03.2019	EDM
Nukumaru Brown Sand	1791	9.6	18	EXT	NKBS_9.6_#18E_Col_1_c	1	2	NA	NA	NA	NA	144	190	31	58	NA	NA	NA	NA	25.03.2019	EDM
Nukumaru Brown Sand	1792	9.6	18	EXT	NKBS_9.6_#18E_Col_1_c	1	3	NA	NA	NA	NA	156	174		NA	NA	NA	NA	NA	25.03.2019	EDM
Nukumaru Brown Sand	1793	9.6	18	EXT	NKBS_9.6_#18E_Col_1_c	1	4	NA	NA	NA	NA	136	186		NA	NA	NA	NA	NA	25.03.2019	EDM
Nukumaru Brown Sand	1794	9.6	18	EXT	NKBS_9.6_#18E_Col_1_c	1	5	NA	NA	NA	NA	127	174		NA	NA	NA	NA	NA	25.03.2019	EDM
Nukumaru Brown Sand	1795	9.6	18	EXT	NKBS_9.6_#18E_Col_1_c	1	11	NA	NA	NA	NA	148	176		NA	NA	NA	NA	NA	25.03.2019	EDM
Nukumaru Brown Sand	1796	9.6	18	EXT	NKBS_9.6_#18E_Col_1_c	1	12	NA	NA	NA	NA	142	194		NA	NA	NA	NA	NA	25.03.2019	EDM
Nukumaru Brown Sand	1797	9.6	18	EXT	NKBS_9.6_#18E_Col_1_c	1	13	NA	NA	NA	NA	163	187		NA	NA	NA	NA	NA	25.03.2019	EDM
Nukumaru Brown Sand	1798	9.6	18	EXT	NKBS_9.6_#18E_Col_1_c	1	14	NA	NA	NA	NA	143	190		NA	NA	NA	NA	NA	25.03.2019	EDM
Nukumaru Brown Sand	1799	9.6	18	EXT	NKBS_9.6_#18E_Col_1_c	1	15	NA	NA	NA	NA	144	180		NA	NA	NA	NA	NA	25.03.2019	EDM
Nukumaru Brown Sand	1800	9.6	18	EXT	NKBS_9.6_#18E_Col_1_c	1	21	NA	NA	NA	NA	156	170		NA	NA	NA	NA	NA	25.03.2019	EDM
Nukumaru Brown Sand	1801	9.6	18	EXT	NKBS_9.6_#18E_Col_1_c	1	19	NA	NA	NA	NA	159	156		NA	NA	NA	NA	NA	25.03.2019	EDM
Nukumaru Brown Sand	1802	9.6	18	EXT	NKBS_9.6_#18E_Col_1_c	1	8	NA	NA	NA	NA	142	165		NA	NA	NA	NA	NA	25.03.2019	EDM
Nukumaru Brown Sand	1803	9.6	18	EXT	NKBS_9.6_#18E_Col_1_c	1	6	NA	NA	NA	NA	151	165		NA	NA	NA	NA	NA	25.03.2019	EDM
Nukumaru Brown Sand	1804	9.6	18	EXT	NKBS_9.6_#18E_Col_1_c	1	9	NA	NA	NA	NA	160	178		NA	NA	NA	NA	NA	25.03.2019	EDM
Nukumaru Brown Sand	1805	9.6	18	EXT	NKBS_9.6_#18E_Col_1_c	1	17	NA	NA	NA	NA	156	200		NA	NA	NA	NA	NA	25.03.2019	EDM
Nukumaru Brown Sand	1806	9.6	18	EXT	NKBS_9.6_#18E_Col_1_c	1	18	NA	NA	NA	NA	140	188		NA	NA	NA	NA	NA	25.03.2019	EDM
Nukumaru Brown Sand	1807	9.6	18	EXT	NKBS_9.6_#18E_Col_1_c	1	22	NA	NA	NA	NA	154	195		NA	NA	NA	NA	NA	25.03.2019	EDM
Nukumaru Brown Sand	1808	9.6	18	EXT	NKBS_9.6_#18E_Col_1_c	1	16	NA	NA	NA	NA	171	166		NA	NA	NA	NA	NA	25.03.2019	EDM
Nukumaru Brown Sand	1809	9.6	18	EXT	NKBS_9.6_#18E_Col_1_c	1	20	NA	NA	NA	NA	137	164		NA	NA	NA	NA	NA	25.03.2019	EDM
Nukumaru Brown Sand	1810	9.6	18	EXT	NKBS_9.6_#18E_Col_1_c	1	67	379	129	NA	NA	NA	NA	NA	NA	NA	NA	NA	NA	25.03.2019	EDM
Nukumaru Brown Sand	1811	9.6	18	EXT	NKBS_9.6_#18E_Col_1_c	1	72	426	135	NA	NA	NA	NA	NA	NA	NA	NA	NA	NA	25.03.2019	EDM
Nukumaru Brown Sand	1812	9.6	18	EXT	NKBS_9.6_#18E_Col_1_c	1	73	338	178	NA	NA	NA	NA	NA	NA	NA	NA	NA	NA	25.03.2019	EDM
Nukumaru Brown Sand	1813	9.6	18	EXT	NKBS_9.6_#18E_Col_1_c	1	59	387	99	NA	NA	NA	NA	NA	NA	NA	NA	NA	NA	25.03.2019	EDM
Nukumaru Brown Sand	1814	9.6	18	EXT	NKBS_9.6_#18E_Col_1_c	1	79	344	164	NA	NA	NA	NA	NA	NA	NA	NA	NA	NA	25.03.2019	EDM
Nukumaru Brown Sand	1815	9.6	18	EXT	NKBS_9.6_#18E_Col_1_b	1	14	NA	NA	NA	NA	150	175	NA	NA	NA	NA	NA	NA	25.03.2019	EDM
Nukumaru Brown Sand	1816	9.6	18	EXT	NKBS_9.6_#18E_Col_1_b	1	15	NA	NA	NA	NA	168	186	NA	NA	NA	NA	NA	NA	25.03.2019	EDM
Nukumaru Brown Sand	1817	9.6	18	EXT	NKBS_9.6_#18E_Col_1_b	1	16	NA	NA	NA	NA	156	184	NA	NA	NA	NA	NA	NA	25.03.2019	EDM
Nukumaru Brown Sand	1818	9.6	18	EXT	NKBS_9.6_#18E_Col_1_b	1	12	NA	NA	NA	NA	165	206	NA	NA	NA	NA	NA	NA	25.03.2019	EDM
Nukumaru Brown Sand	1819	9.6	18	EXT	NKBS_9.6_#18E_Col_1_b	1	10	NA	NA	NA	NA	162	192	NA	NA	NA	NA	NA	NA	25.03.2019	EDM
Nukumaru Brown Sand	1820	9.6	18	EXT	NKBS_9.6_#18E_Col_1_b	1	5	NA	NA	NA	NA	150	193	NA	NA	NA	NA	NA	NA	25.03.2019	EDM
Nukumaru Brown Sand	1821	9.6	18	EXT	NKBS_9.6_#18E_Col_1_b	1	4	NA	NA	NA	NA	146	175	NA	NA	NA	NA	NA	NA	25.03.2019	EDM
Nukumaru Brown Sand	1822	9.6	18	EXT	NKBS_9.6_#18E_Col_1_b	1	3	NA	NA	NA	NA	158	180	NA	NA	NA	NA	NA	NA	25.03.2019	EDM
Nukumaru Brown Sand	1823	9.6	18	EXT	NKBS_9.6_#18E_Col_1_b	1	2	NA	NA	NA	NA	148	204	NA	NA	NA	NA	NA	NA	25.03.2019	EDM
Nukumaru Brown Sand	1824	9.6	18	EXT	NKBS_9.6_#18E_Col_1_b	1	7	NA	NA	NA	NA	152	197	NA	NA	NA	NA	NA	NA	25.03.2019	EDM
Nukumaru Brown Sand	1825	9.6	18	EXT	NKBS_9.6_#18E_Col_1_b	1	44	386	160	NA	NA	NA	NA	NA	NA	NA	NA	NA	NA	25.03.2019	EDM
Nukumaru Brown Sand	1826	9.6	18	EXT	NKBS_9.6_#18E_Col_1_b	1	64	400	135	NA	NA	NA	NA	NA	NA	NA	NA	NA	NA	25.03.2019	EDM
Nukumaru Brown Sand	1827	9.6	18	EXT	NKBS_9.6_#18E_Col_1_b	1	49	351	155	NA	NA	NA	NA	NA	NA	NA	NA	NA	NA	25.03.2019	EDM
Nukumaru Brown Sand	1828	9.6	18	EXT	NKBS_9.6_#18E_Col_1_b	1	52	350	156	NA	NA	NA	NA	NA	NA	NA	NA	NA	NA	25.03.2019	EDM
Nukumaru Brown Sand	1829	9.6	18	EXT	NKBS_9.6_#18E_Col_1_b	1	87	418	161	NA	NA	NA	NA	NA	NA	NA	NA	NA	NA	25.03.2019	EDM
Nukumaru Brown Sand	1830	9.6	18	EXT	NKBS_9.6_#18E_Col_1_b	1	27	NA	NA	NA	NA	NA	NA	NA	NA	243	153	NA	NA	25.03.2019	EDM
Nukumaru Brown Sand	1831	9.6	18	EXT	NKBS_9.6_#18E_Col_1_b	1	22	NA	NA	NA	NA	NA	NA	NA	NA	209	121	NA	NA	25.03.2019	EDM
Nukumaru Brown Sand	1832	9.6	18	EXT	NKBS_9.6_#18E_Col_1_b	1	20	NA	NA	NA	NA	NA	NA	NA	NA	194	141	NA	NA	25.03.2019	EDM
Nukumaru Brown Sand	1833	9.6	18	EXT	NKBS_9.6_#18E_Col_1_b	1	40	NA	NA	NA	NA	NA	NA	NA	NA	316	131	NA	NA	25.03.2019	EDM
Nukumaru Brown Sand	1834	9.6	18	EXT	NKBS_9.6_#18E_Col_1_b	1	92	NA	NA	NA	NA	NA	NA	NA	NA	278	150	NA	NA	25.03.2019	EDM
Nukumaru Brown Sand	1835	9.6	18	EXT	NKBS_9.6_#18E_Col_1_a	1	22	NA	NA	NA	NA	168	183	NA	NA	NA	NA	NA	NA	25.03.2019	EDM
Nukumaru Brown Sand	1836	9.6	18	EXT	NKBS_9.6_#18E_Col_1_a	1	23	NA	NA	NA	NA	150	183	NA	NA	NA	NA	NA	NA	25.03.2019	EDM
Nukumaru Brown Sand	1837	9.6	18	EXT	NKBS_9.6_#18E_Col_1_a	1	21	NA	NA	NA	NA	147	195	NA	NA	NA	NA	NA	NA	25.03.2019	EDM
Nukumaru Brown Sand	1838	9.6	18	EXT	NKBS_9.6_#18E_Col_1_a	1	15	NA	NA	NA	NA	160	175	NA	NA	NA	NA	NA	NA	25.03.2019	EDM
Nukumaru Brown Sand	1839	9.6	18	EXT	NKBS_9.6_#18E_Col_1_a	1	19	NA	NA	NA	NA	141	169	NA	NA	NA	NA	NA	NA	25.03.2019	EDM
Nukumaru Brown Sand	1840	9.6	18	EXT	NKBS_9.6_#18E_Col_1_a	1	16	NA	NA	NA	NA	160	153	NA	NA	NA	NA	NA	NA	25.03.2019	EDM
Nukumaru Brown Sand	1841	9.6	18	EXT	NKBS_9.6_#18E_Col_1_a	1	17	NA	NA	NA	NA	156	168	NA	NA	NA	NA	NA	NA	25.03.2019	EDM
Nukumaru Brown Sand	1842	9.6	18	EXT	NKBS_9.6_#18E_Col_1_a	1	18	NA	NA	NA	NA	163	181	NA	NA	NA	NA	NA	NA	25.03.2019	EDM
Nukumaru Brown Sand	1843	9.6	18	EXT	NKBS_9.6_#18E_Col_1_a	1	14	NA	NA	NA	NA	137	169	NA	NA	NA	NA	NA	NA	25.03.2019	EDM
Nukumaru Brown Sand	1844	9.6	18	EXT	NKBS_9.6_#18E_Col_1_a	1	13	NA	NA	NA	NA	138	178	NA	NA	NA	NA	NA	NA	25.03.2019	EDM
Nukumaru Brown Sand	1845	9.6	18	EXT	NKBS_9.6_#18E_Col_1_a	1	12	NA	NA	NA	NA	152	168	NA	NA	NA	NA	NA	NA	25.03.2019	EDM
Nukumaru Brown Sand	1846	9.6	18	EXT	NKBS_9.6_#18E_Col_1_a	1	9	NA	NA	NA	NA	136	182	NA	NA	NA	NA	NA	NA	25.03.2019	EDM
Nukumaru Brown Sand	1847	9.6	18	EXT	NKBS_9.6_#18E_Col_1_a	1	10	NA	NA	NA	NA	135	173	NA	NA	NA	NA	NA	NA	25.03.2019	EDM
Nukumaru Brown Sand	1848	9.6	18	EXT	NKBS_9.6_#18E_Col_1_a	1	7	NA	NA	NA	NA	162	174	NA	NA	NA	NA	NA	NA	25.03.2019	EDM
Nukumaru Brown Sand	1849	9.6	18	EXT	NKBS_9.6_#18E_Col_1_a	1	8	NA	NA	NA	NA	130	177	NA	NA	NA	NA	NA	NA	25.03.2019	EDM
Nukumaru Brown Sand	1850	9.6	18	EXT	NKBS_9.6_#18E_Col_1_a	1	1	NA	NA	NA	NA	161	166	NA	NA	NA	NA	NA	NA	25.03.2019	EDM
Nukumaru Brown Sand	1851	9.6	18	EXT	NKBS_9.6_#18E_Col_1_a	1	2	NA	NA	NA	NA	149	166	NA	NA	NA	NA	NA	NA	25.03.2019	EDM
Nukumaru Brown Sand	1852	9.6	18	EXT	NKBS_9.6_#18E_Col_1_a	1	3	NA	NA	NA	NA	170	180	NA	NA	NA	NA	NA	NA	25.03.2019	EDM
Nukumaru Brown Sand	1853	9.6	18	EXT	NKBS_9.6_#18E_Col_1_a	1	60	423	130	NA	NA	NA	NA	NA	NA	NA	NA	NA	NA	25.03.2019	EDM
Nukumaru Brown Sand	1854	9.6	18	EXT	NKBS_9.6_#18E_Col_1_a	1	115	322	137	NA	NA	NA	NA	NA	NA	NA	NA	NA	NA	25.03.2019	EDM
Nukumaru Brown Sand	1855	9.6	18	EXT	NKBS_9.6_#18E_Col_1_a	1	100	330	131	NA	NA	NA	NA	NA	NA	NA	NA	NA	NA	25.03.2019	EDM
Nukumaru Brown Sand	1856	9.6	18	EXT	NKBS_9.6_#18E_Col_1_a	1	43	345	155	NA	NA	NA	NA	NA	NA	NA	NA	NA	NA	25.03.2019	EDM
Nukumaru Brown Sand	1857	9.6	18	EXT	NKBS_9.6_#18E_Col_1_a	1	46	356	138	NA	NA	NA	NA	NA	NA	NA	NA	NA	NA	25.03.2019	EDM
Nukumaru Brown Sand	1858	9.6	18	EXT	NKBS_9.6_#18E_Col_1_a	1	86	330	166	NA	NA	NA	NA	NA	NA	NA	NA	NA	NA	25.03.2019	EDM
Nukumaru Brown Sand	1859	9.6	18	EXT	NKBS_9.6_#18E_Col_1_a	1	82	311	140	NA	NA	NA	NA	NA	NA	NA	NA	NA	NA	25.03.2019	EDM
Nukumaru Brown Sand	1860	9.6	18	EXT	NKBS_9.6_#18E_Col_1_a	1	27	NA	NA	NA	NA	NA	NA	NA	NA	249	144	NA	NA	25.03.2019	EDM
Nukumaru Brown Sand	1861	9.6	18	EXT	NKBS_9.6_#18E_Col_6_b	6	1	NA	NA	NA	NA	151	225	41	79	NA	NA	NA	NA	25.03.2019	EDM
Nukumaru Brown Sand	1862	9.6	18	EXT	NKBS_9.6_#18E_Col_6_b	6	4	NA	NA	NA	NA	NA	NA	NA	NA	196	136	NA	NA	25.03.2019	EDM
Nukumaru Brown Sand	1863	9.6	18	EXT	NKBS_9.6_#18E_Col_6_b	6	2	NA	NA	NA	NA	NA	NA	NA	NA	311	194	NA	NA	25.03.2019	EDM
Nukumaru Brown Sand	1864	9.6	18	EXT	NKBS_9.6_#18E_Col_6_b	6	5	NA	NA	NA	NA	NA	NA	NA	NA	263	182	NA	NA	25.03.2019	EDM
Nukumaru Brown Sand	1865	9.6	18	EXT	NKBS_9.6_#18E_Col_6_b	6	3	NA	NA	NA	NA	NA	NA	NA	NA	230	188	NA	NA	25.03.2019	EDM
Nukumaru Brown Sand	1866	9.6	18	EXT	NKBS_9.6_#18E_Col_6_b	6	13	504	178	NA	NA	NA	NA	NA	NA	NA	NA	NA	NA	25.03.2019	EDM
Nukumaru Brown Sand	1867	9.6	18	EXT	NKBS_9.6_#18E_Col_6_b	6	27	371	181	NA	NA	NA	NA	NA	NA	NA	NA	NA	NA	25.03.2019	EDM
Nukumaru Brown Sand	1868	9.6	18	EXT	NKBS_9.6_#18E_Col_6_b	6	29	570	131	NA	NA	NA	NA	NA	NA	NA	NA	NA	NA	25.03.2019	EDM
Nukumaru Brown Sand	1869	9.6	18	EXT	NKBS_9.6_#18E_Col_6_b	6	13	529	166	NA	NA	NA	NA	NA	NA	NA	NA	NA	NA	25.03.2019	EDM
Nukumaru Brown Sand	1870	9.6	18	EXT	NKBS_9.6_#18E_Col_6_b	6	14	404	199	NA	NA	NA	NA	NA	NA	NA	NA	NA	NA	25.03.2019	EDM
Nukumaru Brown Sand	1871	9.6	18	EXT	NKBS_9.6_#18E_Col_6_b	6	8	442	202	NA	NA	NA	NA	NA	NA	NA	NA	NA	NA	25.03.2019	EDM
Nukumaru Brown Sand	1872	9.6	18	EXT	NKBS_9.6_#18E_Col_6_b	6	9	431	189	NA	NA	NA	NA	NA	NA	NA	NA	NA	NA	25.03.2019	EDM
Nukumaru Brown Sand	1873	9.6	18	EXT	NKBS_9.6_#18E_Col_6_b	6	11	470	207	NA	NA	NA	NA	NA	NA	NA	NA	NA	NA	25.03.2019	EDM
Nukumaru Brown Sand	1874	9.6	18	EXT	NKBS_9.6_#18E_Col_6_a	6	1	NA	NA	NA	NA	178	223	NA	NA	NA	NA	NA	NA	25.03.2019	EDM
Nukumaru Brown Sand	1875	9.6	18	EXT	NKBS_9.6_#18E_Col_6_a	6	2	NA	NA	NA	NA	158	185	NA	NA	NA	NA	NA	NA	25.03.2019	EDM
Nukumaru Brown Sand	1876	9.6	18	EXT	NKBS_9.6_#18E_Col_6_a	6	34	412	171	NA	NA	NA	NA	NA	NA	NA	NA	NA	NA	25.03.2019	EDM
Nukumaru Brown Sand	1877	9.6	18	EXT	NKBS_9.6_#18E_Col_6_a	6	58	445	177	NA	NA	NA	NA	NA	NA	NA	NA	NA	NA	25.03.2019	EDM
Nukumaru Brown Sand	1878	9.6	18	EXT	NKBS_9.6_#18E_Col_6_a	6	49	393	185	NA	NA	NA	NA	NA	NA	NA	NA	NA	NA	25.03.2019	EDM
Nukumaru Brown Sand	1879	9.6	18	EXT	NKBS_9.6_#18E_Col_6_a	6	36	509	202	NA	NA	NA	NA	NA	NA	NA	NA	NA	NA	25.03.2019	EDM
Nukumaru Brown Sand	1880	9.6	18	EXT	NKBS_9.6_#18E_Col_6_a	6	15	390	184	NA	NA	NA	NA	NA	NA	NA	NA	NA	NA	25.03.2019	EDM
Nukumaru Brown Sand	1881	9.6	18	EXT	NKBS_9.6_#18E_Col_6_a	6	14	332	159	NA	NA	NA	NA	NA	NA	NA	NA	NA	NA	25.03.2019	EDM
Nukumaru Brown Sand	1882	9.6	18	EXT	NKBS_9.6_#18E_Col_6_a	6	19	450	195	NA	NA	NA	NA	NA	NA	NA	NA	NA	NA	25.03.2019	EDM
Nukumaru Brown Sand	1883	9.6	18	EXT	NKBS_9.6_#18E_Col_6_a	6	24	341	177	NA	NA	NA	NA	NA	NA	NA	NA	NA	NA	25.03.2019	EDM
Nukumaru Brown Sand	1884	9.6	18	EXT	NKBS_9.6_#18E_Col_6_a	6	38	354	176	NA	NA	NA	NA	NA	NA	NA	NA	NA	NA	25.03.2019	EDM
Nukumaru Brown Sand	1885	9.6	18	EXT	NKBS_9.6_#18E_Col_6_a	6	41	437	134	NA	NA	NA	NA	NA	NA	NA	NA	NA	NA	25.03.2019	EDM
Nukumaru Brown Sand	1886	9.6	18	EXT	NKBS_9.6_#18E_Col_6_a	6	37	471	166	NA	NA	NA	NA	NA	NA	NA	NA	NA	NA	25.03.2019	EDM
Nukumaru Brown Sand	1887	9.6	18	EXT	NKBS_9.6_#18E_Col_6_a	6	18	356	196	NA	NA	NA	NA	NA	NA	NA	NA	NA	NA	25.03.2019	EDM
Nukumaru Brown Sand	1888	9.6	18	EXT	NKBS_9.6_#18E_Col_6_a	6	21	429	187	NA	NA	NA	NA	NA	NA	NA	NA	NA	NA	25.03.2019	EDM
Nukumaru Brown Sand	1889	9.6	11	EXT	NKBS_9.6_#11E_Col_8_b	8	1	NA	NA	NA	NA	190	248	NA	NA	NA	NA	NA	NA	25.03.2019	EDM
Nukumaru Brown Sand	1890	9.6	11	EXT	NKBS_9.6_#11E_Col_8_b	8	2	NA	NA	NA	NA	184	261	NA	NA	NA	NA	NA	NA	25.03.2019	EDM
Nukumaru Brown Sand	1891	9.6	11	EXT	NKBS_9.6_#11E_Col_8_b	8	4	NA	NA	NA	NA	193	272	NA	NA	NA	NA	NA	NA	25.03.2019	EDM
Nukumaru Brown Sand	1892	9.6	11	EXT	NKBS_9.6_#11E_Col_8_b	8	29	454	203	NA	NA	NA	NA	NA	NA	NA	NA	NA	NA	25.03.2019	EDM
Nukumaru Brown Sand	1893	9.6	11	EXT	NKBS_9.6_#11E_Col_8_b	8	28	491	207	NA	NA	NA	NA	NA	NA	NA	NA	NA	NA	25.03.2019	EDM
Nukumaru Brown Sand	1894	9.6	11	EXT	NKBS_9.6_#11E_Col_8_b	8	32	536	194	NA	NA	NA	NA	NA	NA	NA	NA	NA	NA	25.03.2019	EDM
Nukumaru Brown Sand	1895	9.6	11	EXT	NKBS_9.6_#11E_Col_8_a	8	11	NA	NA	NA	NA	166	245	NA	NA	NA	NA	NA	NA	25.03.2019	EDM
Nukumaru Brown Sand	1896	9.6	11	EXT	NKBS_9.6_#11E_Col_8_a	8	5	NA	NA	NA	NA	175	256	41	74	NA	NA	NA	NA	25.03.2019	EDM
Nukumaru Brown Sand	1897	9.6	11	EXT	NKBS_9.6_#11E_Col_8_a	8	3	NA	NA	NA	NA	169	254	NA	NA	NA	NA	NA	NA	25.03.2019	EDM
Nukumaru Brown Sand	1898	9.6	11	EXT	NKBS_9.6_#11E_Col_8_a	8	4	NA	NA	NA	NA	162	270	NA	NA	NA	NA	NA	NA	25.03.2019	EDM
Nukumaru Brown Sand	1899	9.6	11	EXT	NKBS_9.6_#11E_Col_8_a	8	7	NA	NA	NA	NA	186	255	NA	NA	NA	NA	NA	NA	25.03.2019	EDM
Nukumaru Brown Sand	1900	9.6	11	EXT	NKBS_9.6_#11E_Col_8_a	8	10	NA	NA	NA	NA	173	288	NA	NA	NA	NA	NA	NA	25.03.2019	EDM
Nukumaru Brown Sand	1901	9.6	11	EXT	NKBS_9.6_#11E_Col_8_a	8	1	NA	NA	NA	NA	198	225	NA	NA	NA	NA	NA	NA	25.03.2019	EDM
Nukumaru Brown Sand	1902	9.6	11	EXT	NKBS_9.6_#11E_Col_8_a	8	6	NA	NA	NA	NA	178	207	NA	NA	NA	NA	NA	NA	25.03.2019	EDM
Nukumaru Brown Sand	1903	9.6	11	EXT	NKBS_9.6_#11E_Col_8_a	8	8	NA	NA	NA	NA	204	269	NA	NA	NA	NA	NA	NA	25.03.2019	EDM
Nukumaru Brown Sand	1904	9.6	11	EXT	NKBS_9.6_#11E_Col_8_a	8	26	423	176	NA	NA	NA	NA	NA	NA	NA	NA	NA	NA	25.03.2019	EDM
Nukumaru Brown Sand	1905	9.6	11	EXT	NKBS_9.6_#11E_Col_8_a	8	43	541	167	NA	NA	NA	NA	NA	NA	NA	NA	NA	NA	25.03.2019	EDM
Nukumaru Brown Sand	1906	9.6	11	EXT	NKBS_9.6_#11E_Col_8_a	8	45	398	179	NA	NA	NA	NA	NA	NA	NA	NA	NA	NA	25.03.2019	EDM
Nukumaru Brown Sand	1907	9.6	11	EXT	NKBS_9.6_#11E_Col_8_a	8	49	505	191	NA	NA	NA	NA	NA	NA	NA	NA	NA	NA	25.03.2019	EDM
Nukumaru Brown Sand	1908	9.6	11	EXT	NKBS_9.6_#11E_Col_8_a	8	28	352	168	NA	NA	NA	NA	NA	NA	NA	NA	NA	NA	25.03.2019	EDM
Nukumaru Brown Sand	1909	9.6	11	EXT	NKBS_9.6_#11E_Col_8_a	8	13	NA	NA	NA	NA	NA	NA	NA	NA	323	164	NA	NA	25.03.2019	EDM
Nukumaru Brown Sand	1910	9.6	11	EXT	NKBS_9.6_#11E_Col_8_a	8	14	NA	NA	NA	NA	NA	NA	NA	NA	419	158	NA	NA	25.03.2019	EDM
Nukumaru Brown Sand	1911	9.6	11	EXT	NKBS_9.6_#11E_Col_8_a	8	32	NA	NA	NA	NA	NA	NA	NA	NA	289	172	NA	NA	25.03.2019	EDM
Nukumaru Brown Sand	1912	9.6	11	EXT	NKBS_9.6_#11E_Col_8_a	8	15	NA	NA	NA	NA	NA	NA	NA	NA	325	184	NA	NA	25.03.2019	EDM
Nukumaru Brown Sand	1913	9.6	10	INT	NKBS_9.6_#10I_Col_2_a	2	13	NA	NA	NA	NA	NA	NA	NA	NA	368	188	NA	NA	25.03.2019	EDM
Nukumaru Brown Sand	1914	9.6	10	INT	NKBS_9.6_#10I_Col_2_a	2	10	NA	NA	NA	NA	NA	NA	NA	NA	296	182	NA	NA	25.03.2019	EDM
Nukumaru Brown Sand	1915	9.6	10	INT	NKBS_9.6_#10I_Col_2_a	2	9	NA	NA	NA	NA	NA	NA	NA	NA	301	152	NA	NA	25.03.2019	EDM
Nukumaru Brown Sand	1916	9.6	10	INT	NKBS_9.6_#10I_Col_2_a	2	17	NA	NA	NA	NA	NA	NA	NA	NA	381	215	NA	NA	25.03.2019	EDM
Nukumaru Brown Sand	1917	9.6	10	INT	NKBS_9.6_#10I_Col_2_a	2	38	466	214	NA	NA	NA	NA	NA	NA	NA	NA	NA	NA	25.03.2019	EDM
Nukumaru Brown Sand	1918	9.6	10	INT	NKBS_9.6_#10I_Col_2_a	2	52	395	239	NA	NA	NA	NA	NA	NA	NA	NA	NA	NA	25.03.2019	EDM
Nukumaru Brown Sand	1919	9.6	10	INT	NKBS_9.6_#10I_Col_2_a	2	42	407	234	NA	NA	NA	NA	NA	NA	NA	NA	NA	NA	25.03.2019	EDM
Nukumaru Brown Sand	1920	9.6	10	INT	NKBS_9.6_#10I_Col_2_a	2	40	499	204	NA	NA	NA	NA	NA	NA	NA	NA	NA	NA	25.03.2019	EDM
Nukumaru Brown Sand	1921	9.6	10	INT	NKBS_9.6_#10I_Col_2_a	2	37	503	228	NA	NA	NA	NA	NA	NA	NA	NA	NA	NA	25.03.2019	EDM
Nukumaru Brown Sand	1922	9.6	10	INT	NKBS_9.6_#10I_Col_2_a	2	39	482	217	NA	NA	NA	NA	NA	NA	NA	NA	NA	NA	25.03.2019	EDM
Nukumaru Brown Sand	1923	9.6	10	INT	NKBS_9.6_#10I_Col_2_a	2	35	551	222	NA	NA	NA	NA	NA	NA	NA	NA	NA	NA	25.03.2019	EDM
Nukumaru Brown Sand	1924	9.6	10	INT	NKBS_9.6_#10I_Col_2_a	2	1	NA	NA	NA	NA	NA	NA	NA	NA	350	211	NA	NA	25.03.2019	EDM
Nukumaru Brown Sand	1925	9.6	10	INT	NKBS_9.6_#10I_Col_2_a	2	3	NA	NA	NA	NA	NA	NA	NA	NA	287	222	NA	NA	25.03.2019	EDM
Nukumaru Brown Sand	1926	9.6	10	INT	NKBS_9.6_#10I_Col_2_a	2	19	471	221	NA	NA	NA	NA	NA	NA	NA	NA	NA	NA	25.03.2019	EDM
Nukumaru Brown Sand	1927	9.6	10	INT	NKBS_9.6_#10I_Col_2_a	2	20	412	198	NA	NA	NA	NA	NA	NA	NA	NA	NA	NA	25.03.2019	EDM
Nukumaru Brown Sand	1928	9.6	10	INT	NKBS_9.6_#10I_Col_2_a	2	21	435	217	NA	NA	NA	NA	NA	NA	NA	NA	NA	NA	25.03.2019	EDM
Nukumaru Brown Sand	1929	116	9	INT	NKBS_116_#9I_Col_2_a	2	2	NA	NA	NA	NA	175	222	NA	NA	NA	NA	NA	NA	25.03.2019	EDM
Nukumaru Brown Sand	1930	116	9	INT	NKBS_116_#9I_Col_2_a	2	3	NA	NA	NA	NA	158	206	NA	NA	NA	NA	NA	NA	25.03.2019	EDM
Nukumaru Brown Sand	1931	116	9	INT	NKBS_116_#9I_Col_2_a	2	61	422	211	NA	NA	NA	NA	NA	NA	NA	NA	NA	NA	25.03.2019	EDM
Nukumaru Brown Sand	1932	116	9	INT	NKBS_116_#9I_Col_2_a	2	28	446	183	NA	NA	NA	NA	NA	NA	NA	NA	NA	NA	25.03.2019	EDM
Nukumaru Brown Sand	1933	116	9	INT	NKBS_116_#9I_Col_2_a	2	46	462	169	NA	NA	NA	NA	NA	NA	NA	NA	NA	NA	25.03.2019	EDM
Nukumaru Brown Sand	1934	116	9	INT	NKBS_116_#9I_Col_2_a	2	12	403	205	NA	NA	NA	NA	NA	NA	NA	NA	NA	NA	25.03.2019	EDM
Nukumaru Brown Sand	1935	116	9	INT	NKBS_116_#9I_Col_2_a	2	53	480	195	NA	NA	NA	NA	NA	NA	NA	NA	NA	NA	25.03.2019	EDM
Nukumaru Brown Sand	1936	116	9	INT	NKBS_116_#9I_Col_1_a	1	1	NA	NA	NA	NA	169	274	NA	NA	NA	NA	NA	NA	25.03.2019	EDM
Nukumaru Brown Sand	1937	116	9	INT	NKBS_116_#9I_Col_1_a	1	2	NA	NA	NA	NA	183	240	NA	NA	NA	NA	NA	NA	25.03.2019	EDM
Nukumaru Brown Sand	1938	116	9	INT	NKBS_116_#9I_Col_1_a	1	3	NA	NA	NA	NA	184	265	NA	NA	NA	NA	NA	NA	25.03.2019	EDM
Nukumaru Brown Sand	1939	116	9	INT	NKBS_116_#9I_Col_1_a	1	8	NA	NA	NA	NA	185	260	NA	NA	NA	NA	NA	NA	25.03.2019	EDM
Nukumaru Brown Sand	1940	116	9	INT	NKBS_116_#9I_Col_1_a	1	55	374	180	NA	NA	NA	NA	NA	NA	NA	NA	NA	NA	25.03.2019	EDM
Nukumaru Brown Sand	1941	116	9	INT	NKBS_116_#9I_Col_1_a	1	54	354	195	NA	NA	NA	NA	NA	NA	NA	NA	NA	NA	25.03.2019	EDM
Nukumaru Brown Sand	1942	116	9	INT	NKBS_116_#9I_Col_1_a	1	61	409	197	NA	NA	NA	NA	NA	NA	NA	NA	NA	NA	25.03.2019	EDM
Nukumaru Brown Sand	1943	72	8	INT	NKBS_72_#8I_Col_2_a	2	23	456	178	NA	NA	NA	NA	NA	NA	NA	NA	NA	NA	25.03.2019	EDM
Nukumaru Brown Sand	1944	72	8	INT	NKBS_72_#8I_Col_2_a	2	48	412	203	NA	NA	NA	NA	NA	NA	NA	NA	NA	NA	25.03.2019	EDM
Nukumaru Brown Sand	1945	72	8	INT	NKBS_72_#8I_Col_2_a	2	20	433	201	NA	NA	NA	NA	NA	NA	NA	NA	NA	NA	25.03.2019	EDM
Nukumaru Brown Sand	1946	72	8	INT	NKBS_72_#8I_Col_2_a	2	45	360	190	NA	NA	NA	NA	NA	NA	NA	NA	NA	NA	25.03.2019	EDM
Nukumaru Brown Sand	1947	72	8	INT	NKBS_72_#8I_Col_2_a	2	21	385	179	NA	NA	NA	NA	NA	NA	NA	NA	NA	NA	25.03.2019	EDM
Nukumaru Brown Sand	1948	72	8	INT	NKBS_72_#8I_Col_2_a	2	4	NA	NA	NA	NA	NA	NA	NA	NA	269	184	NA	NA	25.03.2019	EDM
Nukumaru Brown Sand	1949	72	8	INT	NKBS_72_#8I_Col_2_a	2	2	NA	NA	NA	NA	NA	NA	NA	NA	308	173	NA	NA	25.03.2019	EDM
Nukumaru Brown Sand	1950	72	8	INT	NKBS_72_#8I_Col_2_a	2	1	NA	NA	NA	NA	NA	NA	NA	NA	308	153	NA	NA	25.03.2019	EDM
Nukumaru Brown Sand	1951	72	8	INT	NKBS_72_#8I_Col_2_a	2	3	NA	NA	NA	NA	NA	NA	NA	NA	384	190	NA	NA	25.03.2019	EDM
Nukumaru Brown Sand	1952	72	8	INT	NKBS_72_#8I_Col_2_a	2	8	NA	NA	NA	NA	NA	NA	NA	NA	298	179	NA	NA	25.03.2019	EDM
Nukumaru Brown Sand	1953	72	8	INT	NKBS_72_#8I_Col_1_b	1	5	NA	NA	NA	NA	183	225	NA	NA	NA	NA	NA	NA	25.03.2019	EDM
Nukumaru Brown Sand	1954	72	8	INT	NKBS_72_#8I_Col_1_b	1	1	NA	NA	NA	NA	181	250	NA	NA	NA	NA	NA	NA	25.03.2019	EDM
Nukumaru Brown Sand	1955	72	8	INT	NKBS_72_#8I_Col_1_b	1	2	NA	NA	NA	NA	173	249	NA	NA	NA	NA	NA	NA	25.03.2019	EDM
Nukumaru Brown Sand	1956	72	8	INT	NKBS_72_#8I_Col_1_b	1	43	514	165	NA	NA	NA	NA	NA	NA	NA	NA	NA	NA	25.03.2019	EDM
Nukumaru Brown Sand	1957	72	8	INT	NKBS_72_#8I_Col_1_b	1	76	404	205	NA	NA	NA	NA	NA	NA	NA	NA	NA	NA	25.03.2019	EDM
Nukumaru Brown Sand	1958	72	8	INT	NKBS_72_#8I_Col_1_b	1	74	527	162	NA	NA	NA	NA	NA	NA	NA	NA	NA	NA	25.03.2019	EDM
Nukumaru Brown Sand	1959	72	8	INT	NKBS_72_#8I_Col_1_b	1	49	421	187	NA	NA	NA	NA	NA	NA	NA	NA	NA	NA	25.03.2019	EDM
Nukumaru Brown Sand	1960	72	8	INT	NKBS_72_#8I_Col_1_b	1	65	419	178	NA	NA	NA	NA	NA	NA	NA	NA	NA	NA	25.03.2019	EDM
Nukumaru Brown Sand	1961	72	8	INT	NKBS_72_#8I_Col_1_b	1	10	NA	NA	NA	NA	NA	NA	NA	NA	334	151	NA	NA	25.03.2019	EDM
Nukumaru Brown Sand	1962	72	8	INT	NKBS_72_#8I_Col_1_b	1	16	NA	NA	NA	NA	NA	NA	NA	NA	334	182	NA	NA	25.03.2019	EDM
Nukumaru Brown Sand	1963	72	8	INT	NKBS_72_#8I_Col_1_b	1	30	NA	NA	NA	NA	NA	NA	NA	NA	326	189	NA	NA	25.03.2019	EDM
Nukumaru Brown Sand	1964	72	8	INT	NKBS_72_#8I_Col_1_b	1	33	NA	NA	NA	NA	NA	NA	NA	NA	416	156	NA	NA	25.03.2019	EDM
Nukumaru Brown Sand	1965	72	8	INT	NKBS_72_#8I_Col_1_b	1	31	NA	NA	NA	NA	NA	NA	NA	NA	289	175	NA	NA	25.03.2019	EDM
Nukumaru Brown Sand	1966	72	8	INT	NKBS_72_#8I_Col_1_a	1	1	NA	NA	NA	NA	183	224	44	82	NA	NA	NA	NA	25.03.2019	EDM
Nukumaru Brown Sand	1967	72	8	INT	NKBS_72_#8I_Col_1_a	1	41	385	169	NA	NA	NA	NA	NA	NA	NA	NA	NA	NA	25.03.2019	EDM
Nukumaru Brown Sand	1968	72	8	INT	NKBS_72_#8I_Col_1_a	1	44	384	181	NA	NA	NA	NA	NA	NA	NA	NA	NA	NA	25.03.2019	EDM
Nukumaru Brown Sand	1969	72	8	INT	NKBS_72_#8I_Col_1_a	1	43	447	169	NA	NA	NA	NA	NA	NA	NA	NA	NA	NA	25.03.2019	EDM
Nukumaru Brown Sand	1970	72	8	INT	NKBS_72_#8I_Col_1_a	1	46	402	193	NA	NA	NA	NA	NA	NA	NA	NA	NA	NA	25.03.2019	EDM
Nukumaru Brown Sand	1971	72	8	INT	NKBS_72_#8I_Col_1_a	1	47	387	191	NA	NA	NA	NA	NA	NA	NA	NA	NA	NA	25.03.2019	EDM
Nukumaru Brown Sand	1972	71	11	INT	NKBS_71_#11I_Col_4_a	4	2	NA	NA	NA	NA	150	264	NA	NA	NA	NA	NA	NA	25.03.2019	EDM
Nukumaru Brown Sand	1973	71	11	INT	NKBS_71_#11I_Col_4_a	4	1	NA	NA	NA	NA	163	204	NA	NA	NA	NA	NA	NA	25.03.2019	EDM
Nukumaru Brown Sand	1974	71	11	INT	NKBS_71_#11I_Col_4_a	4	47	379	193	NA	NA	NA	NA	NA	NA	NA	NA	NA	NA	25.03.2019	EDM
Nukumaru Brown Sand	1975	71	11	INT	NKBS_71_#11I_Col_4_a	4	23	392	203	NA	NA	NA	NA	NA	NA	NA	NA	NA	NA	25.03.2019	EDM
Nukumaru Brown Sand	1976	71	11	INT	NKBS_71_#11I_Col_4_a	4	58	455	202	NA	NA	NA	NA	NA	NA	NA	NA	NA	NA	25.03.2019	EDM
Nukumaru Brown Sand	1977	71	11	INT	NKBS_71_#11I_Col_4_a	4	42	459	194	NA	NA	NA	NA	NA	NA	NA	NA	NA	NA	25.03.2019	EDM
Nukumaru Brown Sand	1978	71	11	INT	NKBS_71_#11I_Col_4_a	4	49	428	173	NA	NA	NA	NA	NA	NA	NA	NA	NA	NA	25.03.2019	EDM
Nukumaru Brown Sand	1979	71	11	INT	NKBS_71_#11I_Col_3_a	3	40	365	213	NA	NA	NA	NA	NA	NA	NA	NA	NA	NA	25.03.2019	EDM
Nukumaru Brown Sand	1980	71	11	INT	NKBS_71_#11I_Col_3_a	3	57	341	191	NA	NA	NA	NA	NA	NA	NA	NA	NA	NA	25.03.2019	EDM
Nukumaru Brown Sand	1981	71	11	INT	NKBS_71_#11I_Col_3_a	3	51	362	201	NA	NA	NA	NA	NA	NA	NA	NA	NA	NA	25.03.2019	EDM
Nukumaru Brown Sand	1982	71	11	INT	NKBS_71_#11I_Col_3_a	3	28	400	191	NA	NA	NA	NA	NA	NA	NA	NA	NA	NA	25.03.2019	EDM
Nukumaru Brown Sand	1983	71	11	INT	NKBS_71_#11I_Col_3_a	3	26	525	190	NA	NA	NA	NA	NA	NA	NA	NA	NA	NA	25.03.2019	EDM
Nukumaru Brown Sand	1984	71	11	INT	NKBS_71_#11I_Col_1_a	1	42	477	186	NA	NA	NA	NA	NA	NA	NA	NA	NA	NA	25.03.2019	EDM
Nukumaru Brown Sand	1985	71	11	INT	NKBS_71_#11I_Col_1_a	1	43	407	172	NA	NA	NA	NA	NA	NA	NA	NA	NA	NA	25.03.2019	EDM
Nukumaru Brown Sand	1986	71	11	INT	NKBS_71_#11I_Col_1_a	1	61	365	212	NA	NA	NA	NA	NA	NA	NA	NA	NA	NA	25.03.2019	EDM
Nukumaru Brown Sand	1987	71	11	INT	NKBS_71_#11I_Col_1_a	1	12	488	166	NA	NA	NA	NA	NA	NA	NA	NA	NA	NA	25.03.2019	EDM
Nukumaru Brown Sand	1988	71	11	INT	NKBS_71_#11I_Col_1_a	1	48	420	182	NA	NA	NA	NA	NA	NA	NA	NA	NA	NA	25.03.2019	EDM
Nukumaru Brown Sand	1989	87	14	EXT	NKBS_87_#14E_Col_1_b	1	6	NA	NA	NA	NA	201	298	NA	NA	NA	NA	NA	NA	25.03.2019	EDM
Nukumaru Brown Sand	1990	87	14	EXT	NKBS_87_#14E_Col_1_b	1	5	NA	NA	NA	NA	205	249	NA	NA	NA	NA	NA	NA	25.03.2019	EDM
Nukumaru Brown Sand	1991	87	14	EXT	NKBS_87_#14E_Col_1_b	1	64	404	185	NA	NA	NA	NA	NA	NA	NA	NA	NA	NA	25.03.2019	EDM
Nukumaru Brown Sand	1992	87	14	EXT	NKBS_87_#14E_Col_1_b	1	27	396	172	NA	NA	NA	NA	NA	NA	NA	NA	NA	NA	25.03.2019	EDM
Nukumaru Brown Sand	1993	87	14	EXT	NKBS_87_#14E_Col_1_b	1	13	396	186	NA	NA	NA	NA	NA	NA	NA	NA	NA	NA	25.03.2019	EDM
Nukumaru Brown Sand	1994	87	14	EXT	NKBS_87_#14E_Col_1_a	1	7	NA	NA	NA	NA	227	252	NA	NA	NA	NA	NA	NA	25.03.2019	EDM
Nukumaru Brown Sand	1995	87	14	EXT	NKBS_87_#14E_Col_1_a	1	10	NA	NA	NA	NA	208	241	NA	NA	NA	NA	NA	NA	25.03.2019	EDM
Nukumaru Brown Sand	1996	87	14	EXT	NKBS_87_#14E_Col_1_a	1	3	NA	NA	NA	NA	218	258	NA	NA	NA	NA	NA	NA	25.03.2019	EDM
Nukumaru Brown Sand	1997	87	14	EXT	NKBS_87_#14E_Col_1_a	1	4	NA	NA	NA	NA	209	242	NA	NA	NA	NA	NA	NA	25.03.2019	EDM
Nukumaru Brown Sand	1998	87	14	EXT	NKBS_87_#14E_Col_1_a	1	1	NA	NA	NA	NA	226	283	NA	NA	NA	NA	NA	NA	25.03.2019	EDM
Nukumaru Brown Sand	1999	87	14	EXT	NKBS_87_#14E_Col_1_a	1	38	362	178	NA	NA	NA	NA	NA	NA	NA	NA	NA	NA	25.03.2019	EDM
[truncated: 1,583 more rows]

## Sheet:  joined 3
	Unique.Colony	L.Zooid	W.Zooid	Area.Zooid	Area.Ovicell.c	Shape.Zooid	Colony.Fec1	Colony.Fec2	Colony.reproductive	Colony.N_zooids	Colony.N_autozooids	Colony.Den.AZ	Colony.Den.Repro	Colony.Form	Colony.Shell	Formation_name	interactions	self.interactions	onShell	other
1	116 21 2	NA	NA	NA	96412.3	NA	3.80421	0.176471	10	34	24	15.2168	6.34035	Landguard Formation	116 21	Landguard Formation	0	0	0	0
2	116 9 1	374	195	69030	154831	2.07614	4.23908	0.295082	24	61	37	8.71367	5.65211	Nukumaru Brown Sand	116 9	Nukumaru Brown Sand	0	0	0	0
3	116 9 2	446	195	82615	113924	2.43716	1.76165	0.115942	20	69	49	10.7901	4.40412	Nukumaru Brown Sand	116 9	Nukumaru Brown Sand	0	0	0	0
4	117 1 1	NA	NA	NA	NA	NA	2.38335	0.166667	13	54	41	10.8575	3.44261	Landguard Formation	117 1	Landguard Formation	0	0	0	0
5	117 34 1	420	210	81312	126293	2	3.64591	0.217391	32	69	37	8.99324	7.77794	Landguard Formation	117 34	Landguard Formation	0	0	0	0
6	117 34 2	NA	NA	NA	113440	NA	1.89589	0.125	18	56	38	10.292	4.87514	Landguard Formation	117 34	Landguard Formation	0	0	0	0
7	118 1 1	NA	NA	NA	NA	NA	0	0	3	20	17	13.864	2.44658	Landguard Formation	118 1	Landguard Formation	0	0	0	0
8	118 11 1	NA	NA	NA	128825	NA	1.21294	0.0793651	25	63	38	9.21838	6.06472	Landguard Formation	118 11	Landguard Formation	0	0	0	0
9	118 15 1	NA	NA	NA	108706	NA	1.64736	0.122449	21	49	28	7.68766	5.76575	Landguard Formation	118 15	Landguard Formation	0	0	0	0
10	118 18 1	435	205	89175	NA	2.20339	0.361115	0.02	18	50	32	11.5557	6.50007	Landguard Formation	118 18	Landguard Formation	0	0	0	0
11	118 18 2	467	185	91254	NA	2.58011	0.949511	0.0573593	12.5	37.5	25	10.566	5.50636	Landguard Formation	118 18	Landguard Formation	0	0	0	0
12	118 18 3	462.5	205.5	93347.5	107521	2.16969	0.915731	0.0620269	11.5	64	52.5	11.7792	2.60465	Landguard Formation	118 18	Landguard Formation	0	0	0	0
13	118 19 1	NA	NA	NA	102467	NA	3.03936	0.190476	20	63	43	10.891	5.0656	Landguard Formation	118 19	Landguard Formation	0	0	0	0
14	118 19 2	NA	NA	NA	NA	NA	2.79399	0.173077	16	52	36	11.176	4.96709	Landguard Formation	118 19	Landguard Formation	0	0	0	0
15	118 4 1	442	210	89915.5	112523	2.0684	2.25437	0.137904	22.5	67.5	45	10.7258	5.56968	Landguard Formation	118 4	Landguard Formation	0	0	0	0
16	118 4 2	433	209	87418	100384	2.16268	3.20667	0.162162	36	74	38	10.1545	9.62001	Landguard Formation	118 4	Landguard Formation	0	0	0	0
17	118 5 1	NA	NA	NA	NA	NA	0.258652	0.0185185	9	54	45	11.6393	2.32787	Landguard Formation	118 5	Landguard Formation	0	0	0	0
18	118 5 2	424	201	92568	107521	2.17436	3.15607	0.214286	15	56	41	10.7832	3.94508	Landguard Formation	118 5	Landguard Formation	0	0	0	0
19	118 6 1	473	179	86636	NA	2.63743	0	0	5	55	50	22.1907	2.21907	Landguard Formation	118 6	Landguard Formation	0	0	0	0
20	119 15 1	417	188.5	76867	NA	2.25439	0.336905	0.025	6	40	34	11.4548	2.02143	Landguard Formation	119 15	Landguard Formation	0	0	0	0
21	119 21 1	NA	NA	NA	102922	NA	1.42389	0.111111	4	36	32	11.3911	1.42389	Landguard Formation	119 21	Landguard Formation	0	0	0	0
22	119 21 2	NA	NA	NA	95662.3	NA	3.97852	0.230769	29	52	23	7.62549	9.61475	Landguard Formation	119 21	Landguard Formation	0	0	0	0
23	120 11 1	NA	NA	NA	NA	NA	0.448994	0.030303	12.5	36	23.5	9.91471	5.36231	Landguard Formation	120 11	Landguard Formation	0	0	0	0
24	120 13 1	NA	NA	NA	NA	NA	1.00594	0.0740741	6	27	21	10.5623	3.01781	Landguard Formation	120 13	Landguard Formation	1	1	0	0
25	121 3 1	442	173.5	73938	NA	2.4614	0	0	2	63	61	19.4938	0.639141	Landguard Formation	121 3	Landguard Formation	0	0	0	0
26	21 1 1	434	195	82128	NA	2.13846	0	0	17	51	34	9.89753	4.94877	Shakespeare Cliff Basal Sand Shellbed	21 1	Shakespeare Cliff Basal Sand Shellbed	0	0	0	0
27	21 1 2	470.5	226	104167	133965	2.15178	1.69785	0.114286	32.5	61.5	29	7.07304	7.90006	Shakespeare Cliff Basal Sand Shellbed	21 1	Shakespeare Cliff Basal Sand Shellbed	0	0	0	0
28	21 1 3	NA	NA	NA	NA	NA	1.81951	0.109375	25	64	39	10.1372	6.49823	Shakespeare Cliff Basal Sand Shellbed	21 1	Shakespeare Cliff Basal Sand Shellbed	0	0	0	0
29	21 11 1	496	191	93879	147349	2.64398	1.01518	0.0754717	22	53	31	7.86762	5.58347	Shakespeare Cliff Basal Sand Shellbed	21 11	Shakespeare Cliff Basal Sand Shellbed	1	1	0	0
30	21 11 2	499	211	103734	137885	2.3659	2.09732	0.219512	17	41	24	5.59284	3.9616	Shakespeare Cliff Basal Sand Shellbed	21 11	Shakespeare Cliff Basal Sand Shellbed	1	0	0	1
31	21 11 3	460	208	110494	NA	2.16256	0.746232	0.05	36	60	24	5.96985	8.95478	Shakespeare Cliff Basal Sand Shellbed	21 11	Shakespeare Cliff Basal Sand Shellbed	0	0	0	0
32	21 18 1	525	204	103731	157834	2.50698	1.91186	0.142857	12	28	16	7.64745	5.73559	Shakespeare Cliff Basal Sand Shellbed	21 18	Shakespeare Cliff Basal Sand Shellbed	0	0	0	0
33	21 18 2	481	200.5	92543.5	141196	2.44795	2.49537	0.212121	10	33	23	8.19906	3.56481	Shakespeare Cliff Basal Sand Shellbed	21 18	Shakespeare Cliff Basal Sand Shellbed	0	0	0	0
34	21 2 1	509	233	109435	126293	2.24583	2.77608	0.227273	20	44	24	6.6626	5.55216	Shakespeare Cliff Basal Sand Shellbed	21 2	Shakespeare Cliff Basal Sand Shellbed	0	0	0	0
35	21 25 1	501	207	111723	126293	2.36715	2.56177	0.236842	13	38	25	7.11602	3.70033	Shakespeare Cliff Basal Sand Shellbed	21 25	Shakespeare Cliff Basal Sand Shellbed	0	0	0	0
36	21 25 2	422	205	90447	139205	2.05854	3.0626	0.25	16	40	24	7.35024	4.90016	Shakespeare Cliff Basal Sand Shellbed	21 25	Shakespeare Cliff Basal Sand Shellbed	0	0	0	0
37	23 13 1	464	194	105090	129474	2.21244	3.39351	0.25	22	60	38	8.5969	4.97715	Shakespeare Cliff Basal Sand Shellbed	23 13	Shakespeare Cliff Basal Sand Shellbed	0	0	0	0
38	23 13 2	472	206	94724	136572	2.32789	3.98389	0.3	20	60	40	8.85308	4.42654	Shakespeare Cliff Basal Sand Shellbed	23 13	Shakespeare Cliff Basal Sand Shellbed	1	1	0	0
39	23 13 3	494	197	97318	142531	2.65327	5.62817	0.391304	23	46	23	7.19155	7.19155	Shakespeare Cliff Basal Sand Shellbed	23 13	Shakespeare Cliff Basal Sand Shellbed	1	1	0	0
40	23 13 4	461	213	96030	114608	2.23816	0.77236	0.0545455	17	55	38	9.78322	4.37671	Shakespeare Cliff Basal Sand Shellbed	23 13	Shakespeare Cliff Basal Sand Shellbed	0	0	0	0
41	23 17 1	NA	NA	NA	139569	NA	5.07708	0.478261	24	46	22	5.07708	5.53863	Shakespeare Cliff Basal Sand Shellbed	23 17	Shakespeare Cliff Basal Sand Shellbed	0	0	0	0
42	29 15 1	NA	NA	NA	123940	NA	1.53252	0.106012	18.5	58.5	40	9.82598	4.62381	Shakespeare Cliff Basal Sand Shellbed	29 15	Shakespeare Cliff Basal Sand Shellbed	0	0	0	0
43	29 8 1	483	250	119784	130741	1.94758	1.51355	0.12766	19	47	28	7.06322	4.7929	Shakespeare Cliff Basal Sand Shellbed	29 8	Shakespeare Cliff Basal Sand Shellbed	1	1	0	0
44	33 15 1	NA	NA	NA	NA	NA	0	0	15	38	23	13.0297	8.49762	Nukumaru Limestone	33 15	Nukumaru Limestone	1	1	0	0
45	33 27 1	NA	NA	NA	NA	NA	0	0	10	39	29	13.9075	4.7957	Nukumaru Limestone	33 27	Nukumaru Limestone	0	0	0	0
46	33 6 1	415	183	83000	NA	2.48125	0	0	17	44	27	10.8164	6.81035	Nukumaru Limestone	33 6	Nukumaru Limestone	0	0	0	0
47	34 1 1	NA	NA	NA	135662	NA	1.27828	0.0869565	17	46	29	9.26754	5.4327	Nukumaru Limestone	34 1	Nukumaru Limestone	0	0	0	0
48	34 17 1	359	160	63040	NA	2.44755	0	0	1	47	46	20.1914	0.438943	Nukumaru Limestone	34 17	Nukumaru Limestone	0	0	0	0
49	34 24 1	NA	NA	NA	NA	NA	0	0	18	59	41	12.0157	5.27519	Nukumaru Limestone	34 24	Nukumaru Limestone	1	1	0	0
50	34 8 1	429	166	71214	NA	2.58434	0	0	9	66	57	14.5253	2.29346	Nukumaru Limestone	34 8	Nukumaru Limestone	0	0	0	0
51	35 7 1	NA	NA	NA	NA	NA	2.89586	0.181818	20	55	35	10.1355	5.79173	Nukumaru Limestone	35 7	Nukumaru Limestone	0	0	0	0
52	35 8 1	394	163	65010	144545	2.3913	3.51931	0.214286	16	70	54	12.6695	3.75393	Nukumaru Limestone	35 8	Nukumaru Limestone	0	0	0	0
53	36 10 1	NA	NA	NA	NA	NA	1.4425	0.108696	5	46	41	11.8285	1.4425	Nukumaru Limestone	36 10	Nukumaru Limestone	0	0	0	0
54	39 20 1	389	156	60684	148617	2.49359	1.96502	0.115942	27	69	42	10.3164	6.63195	Nukumaru Limestone	39 20	Nukumaru Limestone	0	0	0	0
55	42 15 1	NA	NA	NA	NA	NA	0	0	6	42	36	15.6033	2.60055	Nukumaru Limestone	42 15	Nukumaru Limestone	0	0	0	0
56	42 19 1	NA	NA	NA	NA	NA	0	0	4	76	72	16.3073	0.905961	Nukumaru Limestone	42 19	Nukumaru Limestone	0	0	0	0
57	42 6 1	386	163	64711	143546	2.6	2.29945	0.127913	13.5	63	49.5	14.359	3.71933	Nukumaru Limestone	42 6	Nukumaru Limestone	1	1	0	0
58	42 6 2	447	185	82695	165468	2.41622	5.62671	0.375	21	56	35	9.37785	5.62671	Nukumaru Limestone	42 6	Nukumaru Limestone	1	1	0	0
59	42 7 1	448	172	78400	124287	2.56	0.953698	0.0519481	22	77	55	13.1133	5.24534	Nukumaru Limestone	42 7	Nukumaru Limestone	0	0	0	0
60	45 15 1	NA	NA	NA	136572	NA	4.63093	0.279761	49	73.3333	24.3333	5.48854	11.0921	Nukumaru Limestone	45 15	Nukumaru Limestone	1	1	0	0
61	45 15 2	433	151.5	71251.5	155528	2.89041	4.23465	0.260752	21	58	37	10.4476	5.86798	Nukumaru Limestone	45 15	Nukumaru Limestone	1	1	0	0
62	45 15 3	432	161	73470	147934	2.68254	2.34676	0.149254	17	67	50	11.7338	3.98949	Nukumaru Limestone	45 15	Nukumaru Limestone	1	1	0	0
63	45 15 4	451	175	80086	169458	2.61601	2.06401	0.147716	20.5	64.5	44	9.65515	4.49306	Nukumaru Limestone	45 15	Nukumaru Limestone	2	2	0	0
64	45 4 1	409	170	74108	162955	2.60526	3.14186	0.204652	32.5	65.5	33	7.67055	7.55324	Nukumaru Limestone	45 4	Nukumaru Limestone	1	1	0	0
65	46 6 1	387	151	60144	NA	2.53103	0.220595	0.010101	25	99	74	16.324	5.51487	Nukumaru Limestone	46 6	Nukumaru Limestone	0	0	0	0
66	46 6 2	NA	NA	NA	123474	NA	2.86443	0.177419	21	62	41	10.6765	5.46847	Nukumaru Limestone	46 6	Nukumaru Limestone	0	0	0	0
67	49 14 3	474	149	66360	NA	3.18121	0	0	3	69	66	16.8273	0.764877	Nukumaru Limestone	49 14	Nukumaru Limestone	0	0	0	0
68	50 1 1	417	172	68800	141863	2.8125	4.66832	0.30303	28	66	38	8.8698	6.53564	Nukumaru Limestone	50 1	Nukumaru Limestone	1	1	0	0
69	50 1 4	471	185	88908	150015	2.53261	2.28241	0.147541	18	61	43	10.9048	4.56482	Nukumaru Limestone	50 1	Nukumaru Limestone	1	1	0	0
70	50 10 1	NA	NA	NA	NA	NA	0.519049	0.03125	13	64	51	13.2358	3.37382	Nukumaru Limestone	50 10	Nukumaru Limestone	0	0	0	0
71	50 20 1	403	158	65254	160919	2.61392	1.55207	0.117647	6	34	28	10.8645	2.32811	Nukumaru Limestone	50 20	Nukumaru Limestone	0	0	0	0
72	51 10 1	435	170	76125	NA	2.48571	0	0	5	43	38	13.3277	1.75365	Nukumaru Limestone	51 10	Nukumaru Limestone	0	0	0	0
73	52 18 1	441	154	67025	144210	2.98274	5.77719	0.338866	26.6667	70	43.3333	10.485	6.6062	Nukumaru Limestone	52 18	Nukumaru Limestone	0	0	0	0
74	52 18 3	420.5	167	71052	NA	2.48216	0	0	0	55	55	19.8041	0	Nukumaru Limestone	52 18	Nukumaru Limestone	1	1	0	0
75	52 6 1	439	161	68045	168365	2.98758	4.45743	0.28125	25	64	39	9.65777	6.19088	Nukumaru Limestone	52 6	Nukumaru Limestone	2	2	0	0
76	52 6 4	428	148	59920	122542	2.98795	5.60015	0.36	18	50	32	9.95582	5.60015	Nukumaru Limestone	52 6	Nukumaru Limestone	0	0	0	0
77	53 1 1	NA	NA	NA	NA	NA	0	0	25	71.5	46.5	12.8093	6.61884	Nukumaru Limestone	53 1	Nukumaru Limestone	0	0	0	0
78	53 22 1	440	184.5	78973	NA	2.34468	0.328062	0.0227273	6	44	38	12.4664	1.96837	Nukumaru Limestone	53 22	Nukumaru Limestone	0	0	0	0
79	53 22 2	384	170	65280	137885	2.25882	3.19656	0.189655	22	58	36	10.4615	6.39312	Nukumaru Limestone	53 22	Nukumaru Limestone	1	1	0	0
80	53 5 1	NA	NA	NA	NA	NA	3.36506	0.241379	7	29	22	10.5759	3.36506	Nukumaru Limestone	53 5	Nukumaru Limestone	0	0	0	0
81	55 19 1	NA	NA	NA	151363	NA	0.975991	0.0666667	9	30	21	10.2479	4.39196	Nukumaru Brown Sand	55 19	Nukumaru Brown Sand	0	0	0	0
82	58 16 1	NA	NA	NA	NA	NA	1.73445	0.16	5	25	20	8.67227	2.16807	Lower Kai-iwi Shellbed	58 16	Lower Kai-iwi Shellbed	0	0	0	0
83	58 17 1	NA	NA	NA	NA	NA	0.899604	0.08	9	25	16	7.19683	4.04822	Lower Kai-iwi Shellbed	58 17	Lower Kai-iwi Shellbed	0	0	0	0
84	58 24 10	NA	NA	NA	NA	NA	0	0	8	18	10	5.54877	4.43902	Lower Kai-iwi Shellbed	58 24	Lower Kai-iwi Shellbed	0	0	0	0
85	58 24 9	471	256.5	121149	148959	1.83269	1.32844	0.15015	12	32	20	5.52136	3.30451	Lower Kai-iwi Shellbed	58 24	Lower Kai-iwi Shellbed	0	0	0	0
86	58 25 1	468.5	271	124610	186272	1.72878	2.00793	0.195122	20	41	21	5.27082	5.01983	Lower Kai-iwi Shellbed	58 25	Lower Kai-iwi Shellbed	0	0	0	0
87	58 25 3	423	255	101001	180203	1.76471	4.4231	0.424242	14	33	19	6.00278	4.4231	Lower Kai-iwi Shellbed	58 25	Lower Kai-iwi Shellbed	0	0	0	0
88	58 25 5	NA	NA	NA	161883	NA	2.31187	0.25	6	16	10	5.77968	3.46781	Lower Kai-iwi Shellbed	58 25	Lower Kai-iwi Shellbed	0	0	0	0
89	58 28 1	NA	NA	NA	NA	NA	0.53674	0.0434783	22	46	24	6.44088	5.90414	Lower Kai-iwi Shellbed	58 28	Lower Kai-iwi Shellbed	0	0	0	0
90	58 7 1	NA	NA	NA	NA	NA	1.97613	0.16129	17	31	14	5.53316	6.71884	Lower Kai-iwi Shellbed	58 7	Lower Kai-iwi Shellbed	0	0	0	0
91	58 7 2	NA	NA	NA	105209	NA	1.61072	0.0980392	19	51	32	10.3086	6.12074	Lower Kai-iwi Shellbed	58 7	Lower Kai-iwi Shellbed	0	0	0	0
92	58 7 3	NA	NA	NA	NA	NA	1.04537	0.117647	7	17	10	5.22685	3.65879	Lower Kai-iwi Shellbed	58 7	Lower Kai-iwi Shellbed	0	0	0	0
93	58 7 7	NA	NA	NA	186272	NA	0.50449	0.0454546	6	22	16	8.07184	3.02694	Lower Kai-iwi Shellbed	58 7	Lower Kai-iwi Shellbed	0	0	0	0
94	58 8 1	484	250	121000	154830	1.936	1.59327	0.147059	18	34	16	5.09846	5.73577	Lower Kai-iwi Shellbed	58 8	Lower Kai-iwi Shellbed	0	0	0	0
95	58 8 7	428	227	94659	NA	1.837	2.58967	0.210526	18	38	20	6.47417	5.82675	Lower Kai-iwi Shellbed	58 8	Lower Kai-iwi Shellbed	0	0	0	0
96	59 25 1	NA	NA	NA	140232	NA	1.05108	0.0909091	15	33	18	6.3065	5.25541	Lower Kai-iwi Shellbed	59 25	Lower Kai-iwi Shellbed	0	0	0	0
97	60 1 1	479.5	227	103547	NA	1.96962	0.996281	0.0714286	22	42	20	6.64187	7.30606	Lower Kai-iwi Shellbed	60 1	Lower Kai-iwi Shellbed	0	0	0	0
98	60 12 1	472	241	106488	152748	1.78008	0.659892	0.0555556	29	54	25	5.4991	6.37895	Lower Kai-iwi Shellbed	60 12	Lower Kai-iwi Shellbed	0	0	0	0
99	60 12 2	474	256	111864	NA	1.84561	0	0	18	37	19	5.97823	5.66358	Lower Kai-iwi Shellbed	60 12	Lower Kai-iwi Shellbed	0	0	0	0
100	60 13 1	468	247	114114	169093	1.87045	0.840619	0.0645161	19	31	12	5.04371	7.98588	Lower Kai-iwi Shellbed	60 13	Lower Kai-iwi Shellbed	1	1	0	0
101	60 19 1	461	240.5	109046	158706	1.90852	0.645745	0.0526316	19	38	19	6.13457	6.13457	Lower Kai-iwi Shellbed	60 19	Lower Kai-iwi Shellbed	0	0	0	0
102	60 3 1	NA	NA	NA	165468	NA	1.15732	0.111111	11	27	16	6.17236	4.2435	Lower Kai-iwi Shellbed	60 3	Lower Kai-iwi Shellbed	0	0	0	0
103	60 4 1	453.5	229	109506	143872	2.0087	0.264187	0.0181818	27	55	28	7.39723	7.13304	Lower Kai-iwi Shellbed	60 4	Lower Kai-iwi Shellbed	0	0	0	0
104	60 4 2	513	246	129555	148617	2.03312	2.64522	0.217391	12	23	11	5.81949	6.34853	Lower Kai-iwi Shellbed	60 4	Lower Kai-iwi Shellbed	0	0	0	0
105	60 5 1	492	232	114144	146587	2.12069	2.628	0.23419	26.5	45	18.5	4.61232	6.62459	Lower Kai-iwi Shellbed	60 5	Lower Kai-iwi Shellbed	0	0	0	0
106	60 7 1	487	252	121767	NA	1.90625	0	0	15	44	29	7.42219	3.83907	Lower Kai-iwi Shellbed	60 7	Lower Kai-iwi Shellbed	0	0	0	0
107	60 7 2	480	267	123956	NA	1.79888	0	0	14	31	17	6.76428	5.57059	Lower Kai-iwi Shellbed	60 7	Lower Kai-iwi Shellbed	0	0	0	0
108	60 8 1	450.5	237.5	110266	143201	1.90249	1.10005	0.0851064	22	47	25	6.87531	6.05027	Lower Kai-iwi Shellbed	60 8	Lower Kai-iwi Shellbed	0	0	0	0
109	60 8 2	426.5	219	92043	NA	1.91685	0	0	5	32	27	11.6369	2.15499	Lower Kai-iwi Shellbed	60 8	Lower Kai-iwi Shellbed	0	0	0	0
110	61 19 1	NA	NA	NA	138544	NA	0.418901	0.0333333	16	30	14	5.86461	6.70241	Lower Kai-iwi Shellbed	61 19	Lower Kai-iwi Shellbed	0	0	0	0
111	61 19 2	NA	NA	NA	NA	NA	0.384734	0.0333333	14	30	16	6.15574	5.38627	Lower Kai-iwi Shellbed	61 19	Lower Kai-iwi Shellbed	0	0	0	0
112	61 19 5	NA	NA	NA	NA	NA	1.36679	0.128205	15	39	24	6.5606	4.10038	Lower Kai-iwi Shellbed	61 19	Lower Kai-iwi Shellbed	0	0	0	0
113	61 19 6	NA	NA	NA	NA	NA	0	0	11	23	12	6.756	6.193	Lower Kai-iwi Shellbed	61 19	Lower Kai-iwi Shellbed	0	0	0	0
114	61 19 7	NA	NA	NA	NA	NA	0.814598	0.0769231	9	26	17	6.92408	3.66569	Lower Kai-iwi Shellbed	61 19	Lower Kai-iwi Shellbed	0	0	0	0
115	61 23 1	493	230	116750	154134	2.11231	0.954745	0.075	16	40	24	7.63796	5.09197	Lower Kai-iwi Shellbed	61 23	Lower Kai-iwi Shellbed	0	0	0	0
116	61 23 7	NA	NA	NA	NA	NA	0	0	9	33	24	9.02188	3.3832	Lower Kai-iwi Shellbed	61 23	Lower Kai-iwi Shellbed	0	0	0	0
117	61 25 1	NA	NA	NA	NA	NA	0	0	7	26	19	7.34669	2.70667	Lower Kai-iwi Shellbed	61 25	Lower Kai-iwi Shellbed	0	0	0	0
118	61 25 2	471	221	105504	137885	2.10268	1.87788	0.128289	13	27	14	7.51154	7.14567	Lower Kai-iwi Shellbed	61 25	Lower Kai-iwi Shellbed	0	0	0	0
119	61 25 3	NA	NA	NA	138544	NA	0.94097	0.0681818	23	44	21	6.58679	7.2141	Lower Kai-iwi Shellbed	61 25	Lower Kai-iwi Shellbed	0	0	0	0
120	61 25 4	NA	NA	NA	130100	NA	1.94477	0.15	22	40	18	5.83431	7.13082	Lower Kai-iwi Shellbed	61 25	Lower Kai-iwi Shellbed	0	0	0	0
121	61 26 1	445	242	107690	135918	1.83884	0.485178	0.0408163	20	49	29	7.03508	4.85178	Lower Kai-iwi Shellbed	61 26	Lower Kai-iwi Shellbed	0	0	0	0
122	61 26 2	NA	NA	NA	167639	NA	0.280018	0.0294118	11	34	23	6.44041	3.0802	Lower Kai-iwi Shellbed	61 26	Lower Kai-iwi Shellbed	0	0	0	0
123	62 10 1	496	240	114543	NA	1.96825	0	0	16	43	27	7.90352	4.68357	Lower Kai-iwi Shellbed	62 10	Lower Kai-iwi Shellbed	0	0	0	0
124	62 20 1	511	242.5	128604	NA	2.05751	0	0	24	42	18	5.4361	7.24813	Lower Kai-iwi Shellbed	62 20	Lower Kai-iwi Shellbed	0	0	0	0
125	62 20 2	580	261	141086	NA	2.22222	0	0	20	34	14	5.54631	7.9233	Lower Kai-iwi Shellbed	62 20	Lower Kai-iwi Shellbed	0	0	0	0
126	62 26 1	535.5	275	140307	NA	1.95233	0	0	19	43	24	6.22374	4.92713	Lower Kai-iwi Shellbed	62 26	Lower Kai-iwi Shellbed	0	0	0	0
127	62 27 1	472.5	248.5	119553	126952	1.78734	0.851982	0.0625	25	48	23	6.53186	7.09985	Lower Kai-iwi Shellbed	62 27	Lower Kai-iwi Shellbed	0	0	0	0
128	62 27 2	485	245	119777	156937	1.96016	0.761847	0.0606061	23	33	10	3.80923	8.76124	Lower Kai-iwi Shellbed	62 27	Lower Kai-iwi Shellbed	0	0	0	0
129	62 28 1	NA	NA	NA	NA	NA	0	0	10	27	17	7.69161	4.52448	Lower Kai-iwi Shellbed	62 28	Lower Kai-iwi Shellbed	0	0	0	0
130	62 7 1	461	226	107240	NA	2.08355	0	0	17	41	24	8.14056	5.76623	Lower Kai-iwi Shellbed	62 7	Lower Kai-iwi Shellbed	0	0	0	0
131	71 11 1	420	182	77380	NA	2.36628	0	0	12	64	52	12.1717	2.80886	Nukumaru Brown Sand	71 11	Nukumaru Brown Sand	1	1	0	0
132	71 11 3	365	191	76400	NA	1.801	0	0	13	64	51	12.7176	3.24173	Nukumaru Brown Sand	71 11	Nukumaru Brown Sand	0	0	0	0
133	71 11 4	428	194	79576	120199	2.25248	0.498977	0.0338983	13	59	46	11.4765	3.24335	Nukumaru Brown Sand	71 11	Nukumaru Brown Sand	0	0	0	0
134	72 8 1	411.5	179.5	76564.5	135304	2.26472	0.839957	0.0448035	38	77.5	39.5	9.31485	8.98456	Nukumaru Brown Sand	72 8	Nukumaru Brown Sand	0	0	0	0
135	72 8 2	412	190	81168	NA	2.15084	0	0	17	57	40	10.7608	4.57333	Nukumaru Brown Sand	72 8	Nukumaru Brown Sand	0	0	0	0
136	86 6 1	NA	NA	NA	141863	NA	0.538474	0.0377359	17	53	36	9.69253	4.57703	Nukumaru Brown Sand	86 6	Nukumaru Brown Sand	0	0	0	0
137	87 11 1	502	219	109180	NA	2.24575	0.163709	0.0113636	6.5	43	36.5	11.0836	2.06151	Nukumaru Brown Sand	87 11	Nukumaru Brown Sand	0	0	0	0
138	87 14 1	400	175	68439	177952	2.18309	2.72554	0.174874	14	69	55	12.5315	3.18587	Nukumaru Brown Sand	87 14	Nukumaru Brown Sand	0	0	0	0
139	87 2 1	373	180	67140	135265	2.13793	1.30087	0.0822331	14.5	59.5	45	12.4946	4.03321	Nukumaru Brown Sand	87 2	Nukumaru Brown Sand	0	0	0	0
140	87 8 1	442.5	187	82522.5	NA	2.33419	0	0	20	69	49	12.3482	5.04007	Nukumaru Brown Sand	87 8	Nukumaru Brown Sand	1	1	0	0
141	87 8 2	NA	NA	NA	140208	NA	2.81937	0.225	9	40	31	9.71117	2.81937	Nukumaru Brown Sand	87 8	Nukumaru Brown Sand	1	1	0	0
142	87 9 1	382	166	63412	128190	2.3012	0.977708	0.0714286	11	56	45	10.9992	2.6887	Nukumaru Brown Sand	87 9	Nukumaru Brown Sand	0	0	0	0
143	89 1 1	NA	NA	NA	117021	NA	0.300192	0.0204082	21	49	28	8.40538	6.30403	Nukumaru Limestone	89 1	Nukumaru Limestone	0	0	0	0
144	89 1 2	446	190	90045	149667	2.34737	1.3825	0.0980392	19.5	42.5	23	7.17931	6.78244	Nukumaru Limestone	89 1	Nukumaru Limestone	0	0	0	0
145	89 1 3	NA	NA	NA	153101	NA	3.8773	0.272727	10	33	23	9.90867	4.30812	Nukumaru Limestone	89 1	Nukumaru Limestone	2	2	0	0
146	89 12 1	430.5	168.5	75102.5	166254	2.57413	1.48837	0.1	18.5	63	44.5	10.6834	4.41171	Nukumaru Limestone	89 12	Nukumaru Limestone	1	1	0	0
147	89 12 2	481	174	84840	164748	2.45589	3.89494	0.251666	33.5	73.5	40	8.42078	7.05274	Nukumaru Limestone	89 12	Nukumaru Limestone	1	1	0	0
148	89 12 5	423	195	82062	108103	2.18041	0.667676	0.0441177	21	68	47	10.4603	4.67373	Nukumaru Limestone	89 12	Nukumaru Limestone	1	1	0	0
149	89 16 1	NA	NA	NA	NA	NA	0	0	9	37	28	13.1443	4.22496	Nukumaru Limestone	89 16	Nukumaru Limestone	0	0	0	0
150	89 2 1	NA	NA	NA	NA	NA	0	0	11	36	25	14.8087	6.51582	Nukumaru Limestone	89 2	Nukumaru Limestone	0	0	0	0
151	9.1 16 2	NA	NA	NA	NA	NA	2.80983	0.188812	17.75	57.5	39.75	10.8024	5.0504	Nukumaru Limestone	9.1 16	Nukumaru Limestone	6	3	17	3
152	9.115 1 1	513	205	105678	127888	2.49029	2.8289	0.19697	24	60.5	36.5	8.63578	5.52995	Shakespeare Cliff Basal Sand Shellbed	9.115 1	Shakespeare Cliff Basal Sand Shellbed	0	0	0	0
153	9.115 1 2	388	191	84972	129462	2.00535	1.65403	0.106268	17.5	59.5	42	11.001	4.58805	Shakespeare Cliff Basal Sand Shellbed	9.115 1	Shakespeare Cliff Basal Sand Shellbed	0	0	0	0
154	9.115 1 3	NA	NA	NA	119224	NA	1.54758	0.112903	19	62	43	9.50654	4.20057	Shakespeare Cliff Basal Sand Shellbed	9.115 1	Shakespeare Cliff Basal Sand Shellbed	0	0	0	0
155	9.115 1 4	NA	NA	NA	126923	NA	1.93087	0.140351	21	57	36	8.68894	5.06855	Shakespeare Cliff Basal Sand Shellbed	9.115 1	Shakespeare Cliff Basal Sand Shellbed	0	0	0	0
156	9.115 10 1	NA	NA	NA	127563	NA	5.19701	0.318841	31	69	38	8.97666	7.32307	Shakespeare Cliff Basal Sand Shellbed	9.115 10	Shakespeare Cliff Basal Sand Shellbed	1	1	0	0
157	9.115 10 2	521	201	106128	117340	2.57738	3.54258	0.245902	27	61	34	8.02985	6.37665	Shakespeare Cliff Basal Sand Shellbed	9.115 10	Shakespeare Cliff Basal Sand Shellbed	0	0	0	0
158	9.115 16 1	NA	NA	NA	119460	NA	4.95344	0.348837	19	43	24	7.9255	6.27435	Shakespeare Cliff Basal Sand Shellbed	9.115 16	Shakespeare Cliff Basal Sand Shellbed	1	1	0	0
159	9.115 17 1	NA	NA	NA	107600	NA	1.11081	0.0714286	18	70	52	11.5525	3.99893	Shakespeare Cliff Basal Sand Shellbed	9.115 17	Shakespeare Cliff Basal Sand Shellbed	0	0	0	0
160	9.115 25 1	NA	NA	NA	NA	NA	0	0	39	62	23	6.16093	10.4468	Shakespeare Cliff Basal Sand Shellbed	9.115 25	Shakespeare Cliff Basal Sand Shellbed	0	0	0	0
161	9.115 3 1	438	179	79450	122232	2.35484	6.60036	0.461645	37.3333	64.6667	27.3333	6.13048	8.31669	Shakespeare Cliff Basal Sand Shellbed	9.115 3	Shakespeare Cliff Basal Sand Shellbed	0	0	0	0
162	9.115 3 2	501	223	110808	153059	2.35897	0.845451	0.0625	17	56.5	39.5	9.1559	3.88461	Shakespeare Cliff Basal Sand Shellbed	9.115 3	Shakespeare Cliff Basal Sand Shellbed	0	0	0	0
163	9.115 3 3	441	219	98343	NA	1.97758	0	0	1	39	38	11.0878	0.291783	Shakespeare Cliff Basal Sand Shellbed	9.115 3	Shakespeare Cliff Basal Sand Shellbed	1	1	0	0
164	9.115 3 4	NA	NA	NA	159043	NA	3.0172	0.255319	16	47	31	7.79443	4.02293	Shakespeare Cliff Basal Sand Shellbed	9.115 3	Shakespeare Cliff Basal Sand Shellbed	1	1	0	0
165	9.115 30 1	NA	NA	NA	119538	NA	4.4664	0.257576	30	66	36	9.45825	7.88188	Shakespeare Cliff Basal Sand Shellbed	9.115 30	Shakespeare Cliff Basal Sand Shellbed	0	0	0	0
166	9.115 30 2	467	201	91656	122554	2.26866	3.14358	0.203704	17	54	37	10.5738	4.85825	Shakespeare Cliff Basal Sand Shellbed	9.115 30	Shakespeare Cliff Basal Sand Shellbed	0	0	0	0
167	9.115 30 3	423	181	75294	115512	2.3764	7.1087	0.471429	35	70	35	7.53953	7.53953	Shakespeare Cliff Basal Sand Shellbed	9.115 30	Shakespeare Cliff Basal Sand Shellbed	0	0	0	0
168	9.115 33 1	503	212	102109	NA	2.47783	0	0	22	63	41	9.80345	5.26039	Shakespeare Cliff Basal Sand Shellbed	9.115 33	Shakespeare Cliff Basal Sand Shellbed	1	1	0	0
169	9.115 33 3	NA	NA	NA	128190	NA	3.6082	0.238095	31	63	32	7.69749	7.45694	Shakespeare Cliff Basal Sand Shellbed	9.115 33	Shakespeare Cliff Basal Sand Shellbed	1	1	0	0
170	9.115 33 5	NA	NA	NA	122542	NA	3.31473	0.235294	24	51	27	7.45815	6.62947	Shakespeare Cliff Basal Sand Shellbed	9.115 33	Shakespeare Cliff Basal Sand Shellbed	1	1	0	0
171	9.115 33 7	NA	NA	NA	139205	NA	3.36422	0.213115	25	61	36	9.31629	6.46964	Shakespeare Cliff Basal Sand Shellbed	9.115 33	Shakespeare Cliff Basal Sand Shellbed	1	1	0	0
172	9.115 33 9	479.5	220.5	111596	142201	2.20363	3.42607	0.258621	20	58	38	8.67937	4.56809	Shakespeare Cliff Basal Sand Shellbed	9.115 33	Shakespeare Cliff Basal Sand Shellbed	0	0	0	0
173	9.115 4 1	450	203	89934	142867	2.28283	2.30095	0.15511	15.3333	52.6667	37.3333	9.95321	4.63732	Shakespeare Cliff Basal Sand Shellbed	9.115 4	Shakespeare Cliff Basal Sand Shellbed	0	0	0	0
174	9.115 4 2	462	212	100700	125036	2.2233	3.57392	0.239434	33.75	67	33.25	7.35573	7.43172	Shakespeare Cliff Basal Sand Shellbed	9.115 4	Shakespeare Cliff Basal Sand Shellbed	0	0	0	0
175	9.115 6 1	397	193	76621	130453	2.05699	3.58568	0.266667	25	60	35	7.84366	5.60262	Shakespeare Cliff Basal Sand Shellbed	9.115 6	Shakespeare Cliff Basal Sand Shellbed	0	0	0	0
176	9.115 6 2	465	197	89400	127556	2.36041	2.82606	0.184615	25	65	40	9.42019	5.88762	Shakespeare Cliff Basal Sand Shellbed	9.115 6	Shakespeare Cliff Basal Sand Shellbed	0	0	0	0
177	9.115 6 3	469	192	95976	130524	2.49468	0.980969	0.0714286	7	42	35	11.4446	2.28893	Shakespeare Cliff Basal Sand Shellbed	9.115 6	Shakespeare Cliff Basal Sand Shellbed	0	0	0	0
178	9.115 6 4	NA	NA	NA	144545	NA	4.0797	0.311475	32	61	29	6.22692	6.87108	Shakespeare Cliff Basal Sand Shellbed	9.115 6	Shakespeare Cliff Basal Sand Shellbed	0	0	0	0
179	9.115 6 5	473.5	217	101335	132025	2.40091	2.16218	0.143269	22.25	65.75	43.5	9.78974	4.97812	Shakespeare Cliff Basal Sand Shellbed	9.115 6	Shakespeare Cliff Basal Sand Shellbed	0	0	0	0
180	9.115 9 1	444	196	90576	121922	2.24176	3.37242	0.225416	25	64.5	39.5	8.52621	5.35667	Shakespeare Cliff Basal Sand Shellbed	9.115 9	Shakespeare Cliff Basal Sand Shellbed	1	1	0	0
181	9.118 5 1	425	156.5	63662	142534	2.59934	4.50004	0.286364	18.5	46.5	28	9.8454	5.89104	Nukumaru Brown Sand	9.118 5	Nukumaru Brown Sand	1	1	0	0
182	9.12 17 15	423	168	71064	133972	2.57627	6.58018	0.383562	32	73	41	9.63527	7.52021	Nukumaru Limestone	9.12 17	Nukumaru Limestone	1	1	13	0
183	9.12 17 16	NA	NA	NA	140550	NA	2.68586	0.163934	19	61	42	11.2806	5.10314	Nukumaru Limestone	9.12 17	Nukumaru Limestone	2	1	13	1
184	9.12 3 12	432	156	66841.5	NA	2.74398	0	0	0	67	67	17.589	0	Nukumaru Limestone	9.12 3	Nukumaru Limestone	1	1	11	0
185	9.12 3 15	NA	NA	NA	NA	NA	0	0	6	64	58	14.8482	1.53602	Nukumaru Limestone	9.12 3	Nukumaru Limestone	2	1	11	1
186	9.12 3 24	NA	NA	NA	NA	NA	0.260675	0.0208333	3	48	45	11.7304	0.782024	Nukumaru Limestone	9.12 3	Nukumaru Limestone	0	0	11	0
187	9.12 3 4	377	146	51649	114365	2.60959	1.60195	0.0877193	6	57	51	16.3399	1.92234	Nukumaru Limestone	9.12 3	Nukumaru Limestone	0	0	11	0
188	9.127 123 1	NA	NA	NA	113712	NA	1.56965	0.123789	15.3333	29	13.6667	6.27109	7.32163	Upper Kai-iwi Shellbed	9.127 123	Upper Kai-iwi Shellbed	2	2	0	0
189	9.127 129 1	455.5	187.5	89870	138224	2.41277	2.06102	0.13805	19.5	59	39.5	9.75871	4.79175	Upper Kai-iwi Shellbed	9.127 129	Upper Kai-iwi Shellbed	0	0	0	0
190	9.127 129 2	NA	NA	NA	NA	NA	0.318147	0.0238095	14	42	28	8.90812	4.45406	Upper Kai-iwi Shellbed	9.127 129	Upper Kai-iwi Shellbed	1	1	0	0
191	9.127 6 1	NA	NA	NA	NA	NA	0	0	8	27	19	9.43303	3.9718	Upper Kai-iwi Shellbed	9.127 6	Upper Kai-iwi Shellbed	0	0	0	0
192	9.128 26 1	496	163	83898	137231	3.01227	5.0364	0.354839	37	62	25	5.72318	8.47031	Upper Kai-iwi Shellbed	9.128 26	Upper Kai-iwi Shellbed	3	3	0	0
193	9.134 1 1	442	191	87958	147934	2.30233	0.107938	0.00757576	9.33333	49.3333	40	11.7164	2.74883	Nukumaru Brown Sand	9.134 1	Nukumaru Brown Sand	1	1	0	0
194	9.136 4 1	NA	NA	NA	130100	NA	3.54432	0.236364	14.5	39.5	25	9.62878	5.37839	Nukumaru Brown Sand	9.136 4	Nukumaru Brown Sand	1	1	0	0
195	9.136 4 3	461	193	84390	139205	2.42381	0.994293	0.0633812	27.6667	71.3333	43.6667	9.89818	6.27799	Nukumaru Brown Sand	9.136 4	Nukumaru Brown Sand	0	0	0	0
196	9.136 7 1	NA	NA	NA	NA	NA	0	0	13	29	16	7.7362	6.28566	Nukumaru Brown Sand	9.136 7	Nukumaru Brown Sand	1	1	0	0
197	9.148 130 1	NA	NA	NA	146279	NA	1.89143	0.181818	8	33	25	7.88097	2.52191	Upper Kai-iwi Shellbed	9.148 130	Upper Kai-iwi Shellbed	0	0	0	0
198	9.148 54 1	498	206	87570	141863	2.41748	0.258853	0.0178571	17	56	39	10.0953	4.4005	Upper Kai-iwi Shellbed	9.148 54	Upper Kai-iwi Shellbed	0	0	0	0
199	9.152 1 1	552	245.5	135618	156228	2.25465	0.907112	0.103448	7	29	22	6.65215	2.11659	Lower Kai-iwi Shellbed	9.152 1	Lower Kai-iwi Shellbed	1	1	0	0
200	9.152 102 1	NA	NA	NA	NA	NA	0.982511	0.0869565	19	46	27	6.63195	4.66693	Lower Kai-iwi Shellbed	9.152 102	Lower Kai-iwi Shellbed	0	0	0	0
201	9.152 104 1	NA	NA	NA	NA	NA	2.56688	0.243243	18	37	19	5.41897	5.13376	Lower Kai-iwi Shellbed	9.152 104	Lower Kai-iwi Shellbed	0	0	0	0
202	9.152 11 1	595	250	148750	165468	2.38	0.54942	0.0487805	26	41	15	4.12065	7.14246	Lower Kai-iwi Shellbed	9.152 11	Lower Kai-iwi Shellbed	0	0	0	0
203	9.152 46 1	NA	NA	NA	NA	NA	0.521349	0.0487805	17	41	24	6.25619	4.43147	Lower Kai-iwi Shellbed	9.152 46	Lower Kai-iwi Shellbed	0	0	0	0
204	9.152 48 1	NA	NA	NA	NA	NA	0.271651	0.0238095	20	42	22	5.97631	5.43301	Lower Kai-iwi Shellbed	9.152 48	Lower Kai-iwi Shellbed	0	0	0	0
205	9.152 5 1	449	226	101474	147934	1.98673	0.760418	0.0652174	21	46	25	6.33681	5.32292	Lower Kai-iwi Shellbed	9.152 5	Lower Kai-iwi Shellbed	0	0	0	0
206	9.152 50 1	NA	NA	NA	NA	NA	0	0	15	45	29	8.34004	4.31382	Lower Kai-iwi Shellbed	9.152 50	Lower Kai-iwi Shellbed	0	0	0	0
207	9.152 57 1	NA	NA	NA	NA	NA	0.674885	0.0545455	28	55	27	6.07397	6.29893	Lower Kai-iwi Shellbed	9.152 57	Lower Kai-iwi Shellbed	0	0	0	0
208	9.152 64 1	NA	NA	NA	136572	NA	1.91975	0.182882	25.25	46	20.75	5.03437	6.1052	Lower Kai-iwi Shellbed	9.152 64	Lower Kai-iwi Shellbed	0	0	0	0
209	9.152 65 1	496	257	120003	125036	1.75484	1.1733	0.108108	14	37	23	6.74645	4.10654	Lower Kai-iwi Shellbed	9.152 65	Lower Kai-iwi Shellbed	0	0	0	0
210	9.152 76 1	438	214.5	93704	164748	2.0912	1.74729	0.179487	14	39	25	6.24033	3.49458	Lower Kai-iwi Shellbed	9.152 76	Lower Kai-iwi Shellbed	1	1	0	0
211	9.152 88 1	465	203	94605	130744	2.2911	1.00372	0.089899	15.5	33.5	18	5.91717	5.256	Lower Kai-iwi Shellbed	9.152 88	Lower Kai-iwi Shellbed	0	0	0	0
212	9.152 92 1	NA	NA	NA	143201	NA	0.774753	0.0833333	11	36	25	6.45628	2.84076	Lower Kai-iwi Shellbed	9.152 92	Lower Kai-iwi Shellbed	0	0	0	0
213	9.153 1 1	492	246	114390	161199	1.9759	0.485531	0.0425532	22	47	25	6.06914	5.34084	Lower Kai-iwi Shellbed	9.153 1	Lower Kai-iwi Shellbed	0	0	0	0
214	9.191 119 1	NA	NA	NA	NA	NA	0	0	8	29	21	8.19928	3.12354	Upper Kai-iwi Shellbed	9.191 119	Upper Kai-iwi Shellbed	0	0	0	0
215	9.191 122 1	NA	NA	NA	NA	NA	0	0	8	21	13	7.50924	4.62107	Upper Kai-iwi Shellbed	9.191 122	Upper Kai-iwi Shellbed	0	0	0	0
216	9.191 130 1	NA	NA	NA	133317	NA	1.09894	0.0736597	14.3333	37.6667	23.3333	9.47358	5.5809	Upper Kai-iwi Shellbed	9.191 130	Upper Kai-iwi Shellbed	1	1	0	0
217	9.191 138 1	NA	NA	NA	121304	NA	3.36321	0.253175	21.6667	52	30.3333	7.91975	5.74483	Upper Kai-iwi Shellbed	9.191 138	Upper Kai-iwi Shellbed	1	1	0	0
218	9.191 14 1	NA	NA	NA	125664	NA	3.91292	0.282051	15	39	24	8.53728	5.3358	Upper Kai-iwi Shellbed	9.191 14	Upper Kai-iwi Shellbed	0	0	0	0
219	9.191 148 1	NA	NA	NA	128190	NA	0.88282	0.0625	16	48	32	9.41675	4.70838	Upper Kai-iwi Shellbed	9.191 148	Upper Kai-iwi Shellbed	0	0	0	0
220	9.191 23 1	NA	NA	NA	NA	NA	0.28456	0.0212766	17	47	30	8.53679	4.83752	Upper Kai-iwi Shellbed	9.191 23	Upper Kai-iwi Shellbed	0	0	0	0
221	9.191 30 1	NA	NA	NA	134614	NA	1.03763	0.0714286	20	42	22	7.6093	6.91754	Upper Kai-iwi Shellbed	9.191 30	Upper Kai-iwi Shellbed	1	1	0	0
222	9.191 44 1	NA	NA	NA	120687	NA	1.89281	0.12069	22	58	36	9.73447	5.94884	Upper Kai-iwi Shellbed	9.191 44	Upper Kai-iwi Shellbed	0	0	0	0
223	9.191 63 1	NA	NA	NA	NA	NA	0.359299	0.025	15	40	25	8.98247	5.38948	Upper Kai-iwi Shellbed	9.191 63	Upper Kai-iwi Shellbed	0	0	0	0
224	9.191 69 1	NA	NA	NA	167292	NA	1.57876	0.138462	17.5	43.5	26	7.18041	4.67262	Upper Kai-iwi Shellbed	9.191 69	Upper Kai-iwi Shellbed	0	0	0	0
225	9.191 89 1	NA	NA	NA	126923	NA	3.51617	0.266667	9	30	21	9.22996	3.9557	Upper Kai-iwi Shellbed	9.191 89	Upper Kai-iwi Shellbed	1	1	0	0
226	9.20 1 19	356	177.5	65188	117629	2.26116	3.43034	0.169014	28	71	43	12.292	8.00412	Nukumaru Limestone	9.20 1	Nukumaru Limestone	0	0	0	0
227	9.21 1 12	368	179	68094	139867	1.87006	1.5757	0.0847458	14	59	45	14.1813	4.41195	Nukumaru Limestone	9.21 1	Nukumaru Limestone	0	0	5	0
228	9.21 1 2	NA	NA	NA	151089	NA	4.77829	0.319149	18	47	29	9.23802	5.73394	Nukumaru Limestone	9.21 1	Nukumaru Limestone	2	1	5	1
229	9.21 1 4	403	165	72930	132670	2.53459	2.98523	0.165487	34	77.5	43.5	10.1839	7.82684	Nukumaru Limestone	9.21 1	Nukumaru Limestone	0	0	5	0
230	9.21 1 6	411	177	72729	164030	2.32291	0.224861	0.0125	17	80	63	14.1662	3.82263	Nukumaru Limestone	9.21 1	Nukumaru Limestone	1	1	5	0
231	9.21 1 7	425	160	63840	176460	2.57923	2.69964	0.163934	26	61	35	9.44873	7.01906	Nukumaru Limestone	9.21 1	Nukumaru Limestone	1	1	5	0
232	9.25 10 14	NA	NA	NA	NA	NA	5.32655	0.315	12.5	35	22.5	10.6823	6.25983	Nukumaru Brown Sand	9.25 10	Nukumaru Brown Sand	0	0	0	0
233	9.25 10 8	381	192	76400	NA	1.99716	2.08073	0.117647	4	17	13	13.5248	4.16146	Nukumaru Brown Sand	9.25 10	Nukumaru Brown Sand	0	0	0	0
234	9.25 15 4	NA	NA	NA	NA	NA	6.13685	0.410256	16	39	23	8.82172	6.13685	Nukumaru Brown Sand	9.25 15	Nukumaru Brown Sand	0	0	10	0
235	9.25 18 22	NA	NA	NA	NA	NA	0.261206	0.0172414	3	29.5	26.5	14.3473	1.66791	Nukumaru Brown Sand	9.25 18	Nukumaru Brown Sand	1	0	7	1
236	9.25 27 2	NA	NA	NA	NA	NA	1.65545	0.111111	3	27	24	13.2436	1.65545	Nukumaru Brown Sand	9.25 27	Nukumaru Brown Sand	1	0	2	1
237	9.25 27 6	NA	NA	NA	NA	NA	0	0	9	34	25	11.5837	4.17014	Nukumaru Brown Sand	9.25 27	Nukumaru Brown Sand	0	0	2	0
238	9.25 29a 15	NA	NA	NA	NA	NA	8.13232	0.430014	33	70	37	10.0001	8.93002	Nukumaru Brown Sand	9.25 29a	Nukumaru Brown Sand	0	0	3	0
239	9.34 10 1	484	194	89832	132670	2.36098	1.9846	0.143197	23.3333	49.6667	26.3333	7.96792	6.67779	Shakespeare Cliff Basal Sand Shellbed	9.34 10	Shakespeare Cliff Basal Sand Shellbed	2	2	16	0
240	9.34 10 10	NA	NA	NA	NA	NA	1.36605	0.15625	12	32	20	5.46418	3.27851	Shakespeare Cliff Basal Sand Shellbed	9.34 10	Shakespeare Cliff Basal Sand Shellbed	0	0	16	0
241	9.34 10 15	NA	NA	NA	140222	NA	1.73732	0.12963	13	54	41	10.1757	3.22645	Shakespeare Cliff Basal Sand Shellbed	9.34 10	Shakespeare Cliff Basal Sand Shellbed	2	2	16	0
242	9.34 10 17	NA	NA	NA	NA	NA	0.126033	0.00943396	13.5	48	34.5	9.19036	3.79403	Shakespeare Cliff Basal Sand Shellbed	9.34 10	Shakespeare Cliff Basal Sand Shellbed	1	1	16	0
243	9.34 10 2	426	231	100614	120076	2.01005	5.99679	0.395833	20	46	26	8.26417	6.64808	Shakespeare Cliff Basal Sand Shellbed	9.34 10	Shakespeare Cliff Basal Sand Shellbed	4	3	16	1
244	9.34 10 3	440	186	80520	NA	2.40437	0	0	8	54	46	13.9979	2.43442	Shakespeare Cliff Basal Sand Shellbed	9.34 10	Shakespeare Cliff Basal Sand Shellbed	2	2	16	0
245	9.34 10 4	471	188	88764	111628	2.27014	2.80695	0.21348	22	56.5	34.5	8.0701	5.15104	Shakespeare Cliff Basal Sand Shellbed	9.34 10	Shakespeare Cliff Basal Sand Shellbed	1	1	16	0
246	9.34 12 1	462	226	104412	146237	2.03125	3.12927	0.244444	14	45	31	8.81884	3.9827	Shakespeare Cliff Basal Sand Shellbed	9.34 12	Shakespeare Cliff Basal Sand Shellbed	2	2	19	0
247	9.34 12 2	419	179.5	76500	131720	2.3664	3.42372	0.258621	23	58	35	7.98868	5.2497	Shakespeare Cliff Basal Sand Shellbed	9.34 12	Shakespeare Cliff Basal Sand Shellbed	3	3	19	0
248	9.34 12 5	531	199	106863	136247	2.63021	2.76599	0.214205	21	52	31	7.54034	5.10088	Shakespeare Cliff Basal Sand Shellbed	9.34 12	Shakespeare Cliff Basal Sand Shellbed	4	3	19	1
249	9.34 16 4	472	205	91200	NA	2.39024	0	0	14	42	28	9.26477	4.63239	Shakespeare Cliff Basal Sand Shellbed	9.34 16	Shakespeare Cliff Basal Sand Shellbed	0	0	8	0
250	9.34 2 1	NA	NA	NA	NA	NA	0	0	0	32	32	13.0922	0	Shakespeare Cliff Basal Sand Shellbed	9.34 2	Shakespeare Cliff Basal Sand Shellbed	1	1	4	0
251	9.34 2 2	437.5	219	95749.5	155878	2.07857	2.80057	0.200265	16	55	39	9.93679	4.05101	Shakespeare Cliff Basal Sand Shellbed	9.34 2	Shakespeare Cliff Basal Sand Shellbed	1	1	4	0
252	9.34 2 3	NA	NA	NA	NA	NA	2.27046	0.178571	5	28	23	10.4441	2.27046	Shakespeare Cliff Basal Sand Shellbed	9.34 2	Shakespeare Cliff Basal Sand Shellbed	0	0	4	0
253	9.34 2 4	442.5	197	84742.5	136250	2.1595	3.34562	0.235519	17.3333	49.6667	32.3333	9.07915	4.09614	Shakespeare Cliff Basal Sand Shellbed	9.34 2	Shakespeare Cliff Basal Sand Shellbed	2	2	4	0
254	9.34 2 5	NA	NA	NA	NA	NA	1.37317	0.119048	11	42	31	8.51368	3.02098	Shakespeare Cliff Basal Sand Shellbed	9.34 2	Shakespeare Cliff Basal Sand Shellbed	1	1	4	0
255	9.34 2 6	449	228	102372	121304	1.88393	2.91508	0.225	9.5	33.5	24	9.40581	3.6953	Shakespeare Cliff Basal Sand Shellbed	9.34 2	Shakespeare Cliff Basal Sand Shellbed	2	2	4	0
256	9.34 2 7	NA	NA	NA	NA	NA	0.690322	0.0512821	3	39	36	12.4258	1.03548	Shakespeare Cliff Basal Sand Shellbed	9.34 2	Shakespeare Cliff Basal Sand Shellbed	1	1	4	0
257	9.34 3 10	511	220.5	109109	138215	2.31262	3.47167	0.267511	23.5	58	34.5	7.73438	5.24331	Shakespeare Cliff Basal Sand Shellbed	9.34 3	Shakespeare Cliff Basal Sand Shellbed	3	3	15	0
258	9.34 3 13	NA	NA	NA	147638	NA	1.92297	0.162791	16	43	27	7.41717	4.39536	Shakespeare Cliff Basal Sand Shellbed	9.34 3	Shakespeare Cliff Basal Sand Shellbed	2	2	15	0
259	9.34 4 4	462	196	90552	NA	2.35714	0.842521	0.0636364	12	42	30	9.83672	3.57084	Shakespeare Cliff Basal Sand Shellbed	9.34 4	Shakespeare Cliff Basal Sand Shellbed	1	1	7	0
260	9.34 4 7	528	212	107586	NA	2.475	0	0	15	32	17	6.51541	5.74889	Shakespeare Cliff Basal Sand Shellbed	9.34 4	Shakespeare Cliff Basal Sand Shellbed	1	1	7	0
261	9.34 4 9	442.5	228.5	97012	NA	1.85604	0	0	24	53.5	29.5	7.64072	6.44387	Shakespeare Cliff Basal Sand Shellbed	9.34 4	Shakespeare Cliff Basal Sand Shellbed	0	0	7	0
262	9.34 5 1	489	207.5	94499.5	NA	2.34188	0	0	14	36	22	9.65251	6.14251	Shakespeare Cliff Basal Sand Shellbed	9.34 5	Shakespeare Cliff Basal Sand Shellbed	1	1	10	0
263	9.34 5 2	428	234	98654	NA	1.82906	0	0	6	36	29	11.009	2.27773	Shakespeare Cliff Basal Sand Shellbed	9.34 5	Shakespeare Cliff Basal Sand Shellbed	2	1	10	1
264	9.34 5 7	457	241	109120	NA	2.07727	0	0	12	39	27	7.80302	3.46801	Shakespeare Cliff Basal Sand Shellbed	9.34 5	Shakespeare Cliff Basal Sand Shellbed	1	1	10	0
265	9.37 3 2	NA	NA	NA	197923	NA	0.48151	0.0535714	19.5	39	19.5	5.11529	5.20332	Lower Kai-iwi Shellbed	9.37 3	Lower Kai-iwi Shellbed	0	0	0	0
266	9.37 4 1	NA	NA	NA	NA	NA	0	0	3	21	18	10.1798	1.69664	Lower Kai-iwi Shellbed	9.37 4	Lower Kai-iwi Shellbed	0	0	0	0
267	9.37 4 2	NA	NA	NA	NA	NA	0	0	11	30	19	6.74908	3.90736	Lower Kai-iwi Shellbed	9.37 4	Lower Kai-iwi Shellbed	0	0	0	0
268	9.37 4 3	NA	NA	NA	NA	NA	1.22459	0.0869565	12	23	11	6.73524	7.34754	Lower Kai-iwi Shellbed	9.37 4	Lower Kai-iwi Shellbed	0	0	0	0
269	9.37 4 4	NA	NA	NA	NA	NA	0	0	11	26.5	15.5	7.91079	4.59757	Lower Kai-iwi Shellbed	9.37 4	Lower Kai-iwi Shellbed	0	0	0	0
270	9.38 11 2	NA	NA	NA	123786	NA	0.511069	0.0369048	10.5	31	20.5	9.13615	4.97188	Upper Kai-iwi Shellbed	9.38 11	Upper Kai-iwi Shellbed	0	0	1	0
271	9.38 18 9	NA	NA	NA	114009	NA	1.13611	0.0714286	1	14	13	14.7694	1.13611	Upper Kai-iwi Shellbed	9.38 18	Upper Kai-iwi Shellbed	0	0	0	0
272	9.38 3 16	NA	NA	NA	NA	NA	0.440891	0.0294118	14	43	29	11.4712	4.98824	Upper Kai-iwi Shellbed	9.38 3	Upper Kai-iwi Shellbed	0	0	4	0
273	9.38 8 40	NA	NA	NA	NA	NA	0	0	3	16	13	9.92215	2.28973	Upper Kai-iwi Shellbed	9.38 8	Upper Kai-iwi Shellbed	2	0	41	2
274	9.4 22 6	NA	NA	NA	NA	NA	0	0	6	23.5	17.5	10.1894	4.0252	Upper Kai-iwi Shellbed	9.4 22	Upper Kai-iwi Shellbed	0	0	8	0
275	9.4 24 2	NA	NA	NA	NA	NA	1.16045	0.0833333	12	36	24	9.28361	4.64181	Upper Kai-iwi Shellbed	9.4 24	Upper Kai-iwi Shellbed	2	1	7	1
276	9.4 24 3	NA	NA	NA	NA	NA	0	0	13	34	21	8.95828	5.5456	Upper Kai-iwi Shellbed	9.4 24	Upper Kai-iwi Shellbed	1	1	7	0
277	9.4 6 3	NA	NA	NA	NA	NA	0.693914	0.0476191	14	43	29	10.2225	4.97956	Upper Kai-iwi Shellbed	9.4 6	Upper Kai-iwi Shellbed	0	0	6	0
278	9.42 11 8	364	199	71839	143296	1.98907	3.53557	0.25	9	20	11	7.77825	6.36402	Upper Kai-iwi Shellbed	9.42 11	Upper Kai-iwi Shellbed	1	0	10	1
279	9.42 21 1	422	185	74500	138544	2.28108	2.0928	0.155714	4.5	19.5	15	9.9474	2.65866	Upper Kai-iwi Shellbed	9.42 21	Upper Kai-iwi Shellbed	0	0	4	0
280	9.42 22 1	NA	NA	NA	145220	NA	2.32918	0.18135	17.5	42	24.5	7.03174	5.52933	Upper Kai-iwi Shellbed	9.42 22	Upper Kai-iwi Shellbed	0	0	2	0
281	9.42 22 11	427.5	211	94249.5	NA	2.03115	1.40934	0.0888889	13	45	32	11.2748	4.58037	Upper Kai-iwi Shellbed	9.42 22	Upper Kai-iwi Shellbed	0	0	2	0
282	9.42 22 9	NA	NA	NA	NA	NA	0	0	6	28	22	11.8394	3.22893	Upper Kai-iwi Shellbed	9.42 22	Upper Kai-iwi Shellbed	1	0	2	1
283	9.42 25 2	398	213.5	84263.5	123786	1.81961	1.28156	0.0888889	12	45	33	10.5729	3.84468	Upper Kai-iwi Shellbed	9.42 25	Upper Kai-iwi Shellbed	1	0	32	1
284	9.42 9 2	NA	NA	NA	NA	NA	0	0	3	22	19	9.66823	1.52656	Upper Kai-iwi Shellbed	9.42 9	Upper Kai-iwi Shellbed	1	0	8	1
285	9.42 9 21	436	210.5	92055	123163	1.95645	1.69256	0.12653	10.3333	26.6667	16.3333	8.30576	5.02194	Upper Kai-iwi Shellbed	9.42 9	Upper Kai-iwi Shellbed	0	0	8	0
286	9.43 2 13	411	202	81789	112815	2.06533	1.5724	0.0865854	27	55.5	28.5	8.95001	9.48045	Upper Kai-iwi Shellbed	9.43 2	Upper Kai-iwi Shellbed	0	0	36	0
287	9.43 2 14	NA	NA	NA	133182	NA	0.575677	0.0391337	16	37.5	21.5	8.29365	6.28853	Upper Kai-iwi Shellbed	9.43 2	Upper Kai-iwi Shellbed	1	0	36	1
288	9.43 2 34	NA	NA	NA	NA	NA	0.493778	0.0204082	9.5	34.5	25	15.9276	5.08902	Upper Kai-iwi Shellbed	9.43 2	Upper Kai-iwi Shellbed	2	0	36	2
289	9.43 21 1	NA	NA	NA	130104	NA	1.90889	0.159524	18.5	41	22.5	6.49866	5.39375	Upper Kai-iwi Shellbed	9.43 21	Upper Kai-iwi Shellbed	1	1	3	0
290	9.43 21 5	491	218	104967	121961	2.30788	2.0517	0.170213	12	47	35	8.9762	3.07755	Upper Kai-iwi Shellbed	9.43 21	Upper Kai-iwi Shellbed	1	1	3	0
291	9.43 21 6	NA	NA	NA	110955	NA	1.87582	0.181818	2	11	9	8.44119	1.87582	Upper Kai-iwi Shellbed	9.43 21	Upper Kai-iwi Shellbed	1	1	3	0
292	9.43 43 3	409	206	93433	119459	1.9875	3.69507	0.254902	20	51	31	8.81132	5.68473	Upper Kai-iwi Shellbed	9.43 43	Upper Kai-iwi Shellbed	1	1	4	0
293	9.43 43 4	450	189	87552	125664	2.3641	2.93255	0.212756	15	38.6667	23.6667	8.57578	4.91302	Upper Kai-iwi Shellbed	9.43 43	Upper Kai-iwi Shellbed	1	1	4	0
294	9.43 44 8	NA	NA	NA	145220	NA	0.353582	0.0243902	12	41	29	10.2539	4.24298	Upper Kai-iwi Shellbed	9.43 44	Upper Kai-iwi Shellbed	1	0	8	1
295	9.44 1 7	NA	NA	NA	NA	NA	0.710631	0.0769231	6	13	7	4.97442	4.26379	Upper Kai-iwi Shellbed	9.44 1	Upper Kai-iwi Shellbed	1	0	13	1
296	9.51 3 1	NA	NA	NA	NA	NA	4.87243	0.252874	34	87	53	11.7381	7.53012	Nukumaru Brown Sand	9.51 3	Nukumaru Brown Sand	1	1	0	0
297	9.52 17 1	NA	NA	NA	NA	NA	0	0	2	22	20	15.3704	1.53704	Nukumaru Brown Sand	9.52 17	Nukumaru Brown Sand	0	0	0	0
298	9.52 35 1	NA	NA	NA	140950	NA	1.52438	0.0997629	20.3333	57.6667	37.3333	10.6964	5.94098	Nukumaru Brown Sand	9.52 35	Nukumaru Brown Sand	1	1	0	0
299	9.6 1 5	NA	NA	NA	NA	NA	0	0	21	53	32	8.39851	5.51152	Nukumaru Brown Sand	9.6 1	Nukumaru Brown Sand	0	0	7	0
300	9.6 1 6	NA	NA	NA	NA	NA	0.895469	0.0638298	16	47	31	9.25318	4.77583	Nukumaru Brown Sand	9.6 1	Nukumaru Brown Sand	0	0	7	0
301	9.6 10 2	468.5	219	100760	NA	2.1544	0	0	18	53	35	8.79574	4.52352	Nukumaru Brown Sand	9.6 10	Nukumaru Brown Sand	2	0	6	2
302	9.6 11 8	472.5	185	91254.5	148624	2.38769	2.60762	0.196886	22	47.5	25.5	6.98821	6.10654	Nukumaru Brown Sand	9.6 11	Nukumaru Brown Sand	1	0	4	1
303	9.6 16 5	462	185	83790	156584	2.60127	1.5567	0.106744	9	63	54	12.1425	2.01139	Nukumaru Brown Sand	9.6 16	Nukumaru Brown Sand	0	0	5	0
304	9.6 16 6	409	181	78223	169094	2.25967	3.58107	0.236364	19	55	36	9.91681	5.23387	Nukumaru Brown Sand	9.6 16	Nukumaru Brown Sand	0	0	5	0
305	9.6 17 9	372	207	79202.5	135918	1.88981	1.6526	0.112413	21	58.25	37.25	9.55645	5.35974	Nukumaru Brown Sand	9.6 17	Nukumaru Brown Sand	0	0	1	0
306	9.6 18 1	351	140	54405	86310.9	2.4125	5.10822	0.210256	36.6667	105.667	69	15.8472	8.42283	Nukumaru Brown Sand	9.6 18	Nukumaru Brown Sand	0	0	3	0
307	9.6 18 2	416.5	200.5	83010	NA	2.16367	0	0	15	45	30	10.4814	5.24072	Nukumaru Brown Sand	9.6 18	Nukumaru Brown Sand	1	0	3	1
308	9.6 18 4	400	197	81928	NA	2.13265	0	0	14	55	41	13.0192	4.44557	Nukumaru Brown Sand	9.6 18	Nukumaru Brown Sand	0	0	3	0
309	9.6 18 6	431	181	78186	111036	2.28042	0.579344	0.032002	8	47	39	14.7783	3.32701	Nukumaru Brown Sand	9.6 18	Nukumaru Brown Sand	1	0	3	1
310	9.6 2 24	NA	NA	NA	NA	NA	0	0	0	21	21	11.4804	0	Nukumaru Brown Sand	9.6 2	Nukumaru Brown Sand	2	0	13	2
311	9.6 22 1	487	180	81506	130420	2.48469	6.62595	0.511111	25	45	20	5.7617	7.20212	Nukumaru Brown Sand	9.6 22	Nukumaru Brown Sand	1	1	2	0
312	9.6 24 2	463.5	198	88648	126294	2.45229	2.55484	0.178068	19	52	33	9.27644	5.30937	Nukumaru Brown Sand	9.6 24	Nukumaru Brown Sand	3	1	8	2
313	9.6 25 9	457	206	91400	118237	2.285	1.85943	0.137931	13	29	16	7.43771	6.04314	Nukumaru Brown Sand	9.6 25	Nukumaru Brown Sand	1	0	21	1
314	9.6 4 6	433	167.5	72737.5	121922	2.58776	2.72056	0.17785	9.66667	40.3333	30.6667	12.0521	3.45791	Nukumaru Brown Sand	9.6 4	Nukumaru Brown Sand	2	0	14	2
315	9.6 6 1	455.5	152	68928.5	115982	3.01328	1.02493	0.0641026	13.5	41.5	28	12.0149	5.71318	Nukumaru Brown Sand	9.6 6	Nukumaru Brown Sand	1	1	7	0
316	9.6 6 11	NA	NA	NA	NA	NA	1.11259	0.0625	6	64	58	16.1326	1.66889	Nukumaru Brown Sand	9.6 6	Nukumaru Brown Sand	1	0	7	1
317	9.6 6 13	NA	NA	NA	NA	NA	0	0	8	36	28	11.8034	3.3724	Nukumaru Brown Sand	9.6 6	Nukumaru Brown Sand	0	0	7	0
318	9.6 6 2	370.5	173.5	62205	NA	2.24789	0	0	11	65	54	15.4013	3.1373	Nukumaru Brown Sand	9.6 6	Nukumaru Brown Sand	1	1	7	0
319	9.6 6 26	NA	NA	NA	151363	NA	1.33381	0.111111	4	27	23	10.2259	1.77841	Nukumaru Brown Sand	9.6 6	Nukumaru Brown Sand	1	1	7	0
320	9.6 7 13	378	195.5	78863.5	NA	2.11338	0	0	11	43	32	11.585	3.98233	Nukumaru Brown Sand	9.6 7	Nukumaru Brown Sand	1	0	24	1
321	9.6 7 19	445	220	93895	132025	2.02075	0.565404	0.039899	16	50.6667	34.6667	9.63563	4.41838	Nukumaru Brown Sand	9.6 7	Nukumaru Brown Sand	1	0	24	1
322	9.6 7 5	401.5	177.5	70598.5	139205	2.31144	1.73416	0.123994	11	50	39	12.0619	3.34965	Nukumaru Brown Sand	9.6 7	Nukumaru Brown Sand	1	1	24	0
323	9.6 9 10	459.5	200.5	91932	150702	2.40832	1.08213	0.085133	13	38.75	25.75	7.90957	4.08917	Nukumaru Brown Sand	9.6 9	Nukumaru Brown Sand	2	1	13	1
324	9.6 9 18	391	201.5	80719.5	132673	1.9298	1.04707	0.0666667	15	60	45	11.7795	3.9265	Nukumaru Brown Sand	9.6 9	Nukumaru Brown Sand	1	0	13	1
325	9.69 12 1	442	214	91140	133317	2.06542	2.39555	0.180958	25	56.5	31.5	7.43582	5.95153	Shakespeare Cliff Basal Sand Shellbed	9.69 12	Shakespeare Cliff Basal Sand Shellbed	1	1	0	0
326	9.69 12 3	465	201	108388	133317	2.34555	2.08342	0.172336	22.5	51.5	29	6.70327	5.20599	Shakespeare Cliff Basal Sand Shellbed	9.69 12	Shakespeare Cliff Basal Sand Shellbed	0	0	0	0
327	9.69 12 4	451	225	103950	130100	2.0124	0.216816	0.0178571	9	56	47	10.1904	1.95135	Shakespeare Cliff Basal Sand Shellbed	9.69 12	Shakespeare Cliff Basal Sand Shellbed	0	0	0	0
328	9.69 12 5	518.5	201.5	106542	127100	2.42686	1.3764	0.101695	24	59	35	8.029	5.5056	Shakespeare Cliff Basal Sand Shellbed	9.69 12	Shakespeare Cliff Basal Sand Shellbed	0	0	0	0
329	9.69 2 1	NA	NA	NA	NA	NA	1.76848	0.137255	19	51	32	8.08448	4.80016	Shakespeare Cliff Basal Sand Shellbed	9.69 2	Shakespeare Cliff Basal Sand Shellbed	0	0	0	0
330	9.69 2 2	421	227	95113	NA	1.93119	0.500225	0.04	17	50	33	8.25371	4.25191	Shakespeare Cliff Basal Sand Shellbed	9.69 2	Shakespeare Cliff Basal Sand Shellbed	0	0	0	0
331	9.69 2 3	NA	NA	NA	169157	NA	1.09254	0.0909091	16	44	28	7.64777	4.37015	Shakespeare Cliff Basal Sand Shellbed	9.69 2	Shakespeare Cliff Basal Sand Shellbed	0	0	0	0
332	9.69 54 1	459	227	98494	143879	2.205	1.26736	0.0980392	25	51	26	6.59029	6.33681	Shakespeare Cliff Basal Sand Shellbed	9.69 54	Shakespeare Cliff Basal Sand Shellbed	0	0	0	0
333	9.69 54 2	477	194	106020	160510	2.56757	1.35159	0.103448	15	58	43	9.68643	3.37899	Shakespeare Cliff Basal Sand Shellbed	9.69 54	Shakespeare Cliff Basal Sand Shellbed	0	0	0	0
334	9.69 54 3	551	192	105792	136572	2.86979	1.76887	0.143275	16	46.5	30.5	8.26016	3.98335	Shakespeare Cliff Basal Sand Shellbed	9.69 54	Shakespeare Cliff Basal Sand Shellbed	0	0	0	0
335	9.69 55 1	NA	NA	NA	130422	NA	6.19471	0.453281	28.5	60	31.5	7.12877	6.52342	Shakespeare Cliff Basal Sand Shellbed	9.69 55	Shakespeare Cliff Basal Sand Shellbed	3	3	0	0
336	9.69 55 2	NA	NA	NA	NA	NA	0.615347	0.0444444	19	45	26	7.99951	5.84579	Shakespeare Cliff Basal Sand Shellbed	9.69 55	Shakespeare Cliff Basal Sand Shellbed	2	2	0	0
337	9.69 55 3	NA	NA	NA	129783	NA	3.33868	0.217391	24	46	22	7.34509	8.01282	Shakespeare Cliff Basal Sand Shellbed	9.69 55	Shakespeare Cliff Basal Sand Shellbed	3	3	0	0
338	9.69 8 1	449	178	84490	133317	2.42484	5.10855	0.362337	30	65	35	7.52498	6.47286	Shakespeare Cliff Basal Sand Shellbed	9.69 8	Shakespeare Cliff Basal Sand Shellbed	1	1	0	0
339	9.69 8 2	421.5	200	84832	139867	2.18407	5.04048	0.362903	27	62	35	7.87438	6.05852	Shakespeare Cliff Basal Sand Shellbed	9.69 8	Shakespeare Cliff Basal Sand Shellbed	1	1	0	0
340	9.76 7 1	418	188	79356	125355	2.2234	0.638121	0.0454546	20.5	47.5	27	9.07891	6.79398	Nukumaru Brown Sand	9.76 7	Nukumaru Brown Sand	0	0	0	0
341	9.8 1 13	NA	NA	NA	NA	NA	0	0	3	29	26	7.91669	0.913464	Nukumaru Limestone	9.8 1	Nukumaru Limestone	0	0	11	0
342	9.8 1 16	NA	NA	NA	NA	NA	0.959509	0.0555556	4	18	14	13.4331	3.83803	Nukumaru Limestone	9.8 1	Nukumaru Limestone	1	0	11	1
343	9.8 1 27	NA	NA	NA	NA	NA	0	0	9	48	39	13.0078	3.0018	Nukumaru Limestone	9.8 1	Nukumaru Limestone	0	0	11	0
344	9.8 15 9	386.5	167.5	65092.5	140531	2.34891	1.0585	0.0625	14	49	35	11.6257	4.78085	Nukumaru Limestone	9.8 15	Nukumaru Limestone	0	0	1	0
345	9.8 16 1	355.5	139.5	50248	124733	2.55174	3.45999	0.196429	19	56	37	11.6381	5.97635	Nukumaru Limestone	9.8 16	Nukumaru Limestone	0	0	4	0
346	9.8 18 1	375.5	166	61673.5	129465	2.29034	1.91031	0.140387	19.6667	56.6667	37	10.6027	5.0795	Nukumaru Limestone	9.8 18	Nukumaru Limestone	1	0	3	1
347	9.8 18 4	375	171	69426	132025	2.24551	3.91492	0.28011	21	63.5	42.5	9.38703	4.57945	Nukumaru Limestone	9.8 18	Nukumaru Limestone	1	0	3	1
348	9.8 20 1	NA	NA	NA	130100	NA	2.00275	0.116667	21	60	39	11.1582	6.00824	Nukumaru Limestone	9.8 20	Nukumaru Limestone	3	1	7	2
349	9.8 20 2	378	183	69084	NA	2.03867	0	0	38	80	42	9.72627	8.79996	Nukumaru Limestone	9.8 20	Nukumaru Limestone	1	1	7	0
350	9.8 22 8	387	173	64629	144545	2.30263	3.41363	0.18993	12.5	38	25.5	13.1903	4.85571	Nukumaru Limestone	9.8 22	Nukumaru Limestone	2	0	6	2
351	9.8 28 8	367	170	62390	NA	2.11392	0	0	12	37	25	11.5623	5.5499	Nukumaru Limestone	9.8 28	Nukumaru Limestone	1	0	5	1
352	9.8 32 10	354	149	57348	115209	2.37162	1.48214	0.0895522	10	67	57	14.0803	2.47023	Nukumaru Limestone	9.8 32	Nukumaru Limestone	1	0	4	1
353	9.8 35 12	356	167	58701.5	125664	2.1319	4.5687	0.285625	28.3333	67.6667	39.3333	9.22	6.91392	Nukumaru Limestone	9.8 35	Nukumaru Limestone	1	1	16	0
354	9.8 35 17	NA	NA	NA	NA	NA	4.97694	0.287083	23.5	69.5	46	11.8136	5.84898	Nukumaru Limestone	9.8 35	Nukumaru Limestone	1	1	16	0
355	9.8 35 18	NA	NA	NA	NA	NA	4.92466	0.316717	25.3333	71.6667	46.3333	9.93321	5.4245	Nukumaru Limestone	9.8 35	Nukumaru Limestone	2	1	16	1
356	9.8 38 12	NA	NA	NA	NA	NA	1.56768	0.0921053	29	76	47	10.5258	6.49467	Nukumaru Limestone	9.8 38	Nukumaru Limestone	0	0	1	0
357	9.8 6 11	NA	NA	NA	130100	NA	6.14083	0.45	20	40	20	6.82314	6.82314	Nukumaru Limestone	9.8 6	Nukumaru Limestone	0	0	4	0
358	9.8 6 3	NA	NA	NA	NA	NA	1.14626	0.0612245	5	49	44	16.8119	1.91044	Nukumaru Limestone	9.8 6	Nukumaru Limestone	1	1	4	0
359	9.8 6 4	NA	NA	NA	NA	NA	1.61228	0.0793651	17	63	46	14.833	5.48175	Nukumaru Limestone	9.8 6	Nukumaru Limestone	3	1	4	2
360	9.8 8 1	NA	NA	NA	NA	NA	4.44405	0.4	10	25	15	6.66607	4.44405	Nukumaru Limestone	9.8 8	Nukumaru Limestone	0	0	7	0
361	9.80 37 1	NA	NA	NA	NA	NA	0	0	5	46	41	12.0581	1.4705	Nukumaru Brown Sand	9.80 37	Nukumaru Brown Sand	0	0	0	0
362	9.9 1 12	418	177	73319	160460	2.3057	4.49442	0.278594	22.5	71.5	49	11.0608	5.07085	Nukumaru Limestone	9.9 1	Nukumaru Limestone	1	0	19	1
363	9.9 1 16	427	189	78995	152746	2.30811	3.93956	0.274194	25	62	37	8.57434	5.79347	Nukumaru Limestone	9.9 1	Nukumaru Limestone	2	0	19	2
364	9.98 1 1	552	218	120436	162273	2.53534	0.228718	0.02	20.5	39.5	19	5.98905	5.69302	Lower Kai-iwi Shellbed	9.98 1	Lower Kai-iwi Shellbed	0	0	0	0
365	9.98 3 1	NA	NA	NA	NA	NA	0.166378	0.0138889	14.5	39	24.5	7.16385	4.55533	Lower Kai-iwi Shellbed	9.98 3	Lower Kai-iwi Shellbed	1	1	0	0
366	9.98 3 2	NA	NA	NA	NA	NA	0	0	14	29	15	6.62193	6.18047	Lower Kai-iwi Shellbed	9.98 3	Lower Kai-iwi Shellbed	1	1	0	0
367	9.98 8 1	NA	NA	NA	NA	NA	0	0	9	24	15	6.8021	4.08126	Lower Kai-iwi Shellbed	9.98 8	Lower Kai-iwi Shellbed	0	0	0	0
368	93 15 1	NA	NA	NA	161171	NA	3.58027	0.231305	25	67	42	9.54288	5.66886	Nukumaru Limestone	93 15	Nukumaru Limestone	0	0	0	0
369	94 1 1	465	183	80982	133317	2.42512	2.19021	0.157895	13	57	44	10.7077	3.16363	Nukumaru Limestone	94 1	Nukumaru Limestone	1	1	0	0
370	94 1 2	434	188.5	79858	143201	2.34513	0.871042	0.054054	14	74	60	13.0656	3.04865	Nukumaru Limestone	94 1	Nukumaru Limestone	1	1	0	0
371	94 1 3	422	177	76382	128845	2.64407	2.9075	0.171053	24	76	52	11.63	5.36769	Nukumaru Limestone	94 1	Nukumaru Limestone	2	2	0	0
372	94 1 4	403	184	72137	142531	2.1658	3.61304	0.195122	11	41	30	13.5489	4.96793	Nukumaru Limestone	94 1	Nukumaru Limestone	0	0	0	0
373	94 1 5	NA	NA	NA	NA	NA	0.519454	0.0338983	7	59	52	13.5058	1.81809	Nukumaru Limestone	94 1	Nukumaru Limestone	0	0	0	0
374	94 1 6	NA	NA	NA	163313	NA	4.60008	0.307692	21	52	31	8.91266	6.03761	Nukumaru Limestone	94 1	Nukumaru Limestone	0	0	0	0
375	94 1 7	NA	NA	NA	132670	NA	1.77101	0.115942	20	69	49	10.8474	4.42752	Nukumaru Limestone	94 1	Nukumaru Limestone	0	0	0	0
376	94 14 1	432.5	165	71387	114325	2.56684	1.09561	0.0483871	16	62	46	16.7994	5.84325	Nukumaru Limestone	94 14	Nukumaru Limestone	0	0	0	0
377	94 14 2	NA	NA	NA	142495	NA	0.731743	0.0377359	13	53	40	14.6349	4.75633	Nukumaru Limestone	94 14	Nukumaru Limestone	0	0	0	0
378	94 15 1	NA	NA	NA	NA	NA	0	0	5	51	46	12.2988	1.33683	Nukumaru Limestone	94 15	Nukumaru Limestone	0	0	0	0
379	94 15 2	402	165	66748	172021	2.35152	3.00812	0.181818	14	66	52	13.0352	3.50948	Nukumaru Limestone	94 15	Nukumaru Limestone	1	1	0	0
380	94 17 1	NA	NA	NA	NA	NA	0	0	14	77	63	16.207	3.60156	Nukumaru Limestone	94 17	Nukumaru Limestone	0	0	0	0
381	94 9 1	NA	NA	NA	NA	NA	0	0	3	59	56	17.3794	0.931041	Nukumaru Limestone	94 9	Nukumaru Limestone	0	0	0	0
382	95 7 1	465	160	73470	145896	2.77124	4.87459	0.333333	24	66	42	9.30604	5.31773	Nukumaru Limestone	95 7	Nukumaru Limestone	0	0	0	0
383	95 7 2	415	156	64782	NA	2.68553	0	0	6	58	52	14.5365	1.67729	Nukumaru Limestone	95 7	Nukumaru Limestone	0	0	0	0
384	95 7 3	386	176	69524	NA	2.10929	0	0	11	71	60	15.086	2.76576	Nukumaru Limestone	95 7	Nukumaru Limestone	0	0	0	0
385	97 1 1	NA	NA	NA	NA	NA	0	0	28	54	26	9.37207	10.093	Landguard Formation	97 1	Landguard Formation	0	0	0	0
386	97 1 2	380	204	77520	NA	1.86275	0	0	11	21	10	6.77874	7.45662	Landguard Formation	97 1	Landguard Formation	0	0	0	0
387	97 13 1	448.5	182.5	84182.5	99538.2	2.44973	0.256331	0.0172414	21	58	37	9.48426	5.38296	Landguard Formation	97 13	Landguard Formation	0	0	0	0
388	97 14 13	386	171	67936	100667	2.19318	2.93456	0.173913	23	69	46	11.2491	5.62457	Landguard Formation	97 14	Landguard Formation	0	0	0	0
389	97 14 18	NA	NA	NA	NA	NA	1.21743	0.075	5	40	35	14.2034	2.02906	Landguard Formation	97 14	Landguard Formation	0	0	0	0
390	97 14 20	496	176	85007	110447	2.71038	3.93933	0.24	17	50	33	10.8332	5.58072	Landguard Formation	97 14	Landguard Formation	0	0	0	0
391	97 14 3	434	184	83196.5	88142.1	2.27782	0.354845	0.0189873	9.5	67.5	58	15.4795	2.45841	Landguard Formation	97 14	Landguard Formation	0	0	0	0
392	97 14 4	448	261	116928	NA	1.75655	0	0	6	44	38	9.43818	1.49024	Landguard Formation	97 14	Landguard Formation	0	0	0	0
393	97 14 5	474	210	94800	154153	2.37	3.37866	0.269662	22.6667	47	24.3333	6.2782	5.8278	Landguard Formation	97 14	Landguard Formation	0	0	0	0
394	97 14 6	400.5	172.5	67215	106941	2.23485	5.36381	0.291243	32	75.5	43.5	10.6337	7.79576	Landguard Formation	97 14	Landguard Formation	0	0	0	0
395	97 18 1	NA	NA	NA	115209	NA	2.23986	0.134615	27	52	25	7.99949	8.63945	Landguard Formation	97 18	Landguard Formation	0	0	0	0
396	97 19 1	367	182	65693	94569	2.01914	3.03552	0.266667	23	45	22	5.56511	5.81807	Landguard Formation	97 19	Landguard Formation	0	0	0	0
397	97 2 2	NA	NA	NA	NA	NA	0	0	0	24	23	10.6324	0	Landguard Formation	97 2	Landguard Formation	0	0	0	0
398	97 20 1	514	202	103828	118237	2.26957	1.41836	0.0980392	16	51	35	9.92851	4.53875	Landguard Formation	97 20	Landguard Formation	0	0	0	0
399	97 20 2	NA	NA	NA	NA	NA	0	0	0	32	32	14.2146	0	Landguard Formation	97 20	Landguard Formation	0	0	0	0
400	97 20 3	NA	NA	NA	NA	NA	0	0	9	51	42	12.3595	2.64846	Landguard Formation	97 20	Landguard Formation	0	0	0	0
401	97 20 4	NA	NA	NA	NA	NA	0	0	16	62	46	13.6978	4.76446	Landguard Formation	97 20	Landguard Formation	0	0	0	0
402	97 23 1	425	195	86860	103208	2.3913	1.62481	0.0909091	25	77	52	12.07	5.80289	Landguard Formation	97 23	Landguard Formation	0	0	0	0
403	97 24 1	394	188	78948	NA	2.05319	0	0	25	67	42	10.9142	6.49654	Landguard Formation	97 24	Landguard Formation	0	0	0	0
404	97 24 2	410	197	76633	NA	2.05	0	0	11	58	47	12.3418	2.8885	Landguard Formation	97 24	Landguard Formation	0	0	0	0
405	97 4 5	405	221	98415	NA	1.7346	0	0	2	59	57	13.3702	0.469131	Landguard Formation	97 4	Landguard Formation	0	0	0	0
406	97 4 6	429	209	86430	NA	2.02347	0	0	6	44	38	12.811	2.02279	Landguard Formation	97 4	Landguard Formation	0	0	0	0
407	97 6 11	483	204.5	95619	NA	2.37906	0.243416	0.0178571	10	56	46	11.1971	2.43416	Landguard Formation	97 6	Landguard Formation	0	0	0	0
408	97 6 8	440	218	95920	102072	2.01835	0.847371	0.0536202	19	54.5	35.5	10.2435	5.73276	Landguard Formation	97 6	Landguard Formation	0	0	0	0
409	98 11 1	NA	NA	NA	94225.8	NA	0.794573	0.0550595	8.5	37	28.5	10.9617	3.40975	Landguard Formation	98 11	Landguard Formation	0	0	0	0
410	98 11 2	368	179	67124	102923	2.15205	4.18917	0.291111	13.5	43	29.5	9.87483	4.33877	Landguard Formation	98 11	Landguard Formation	0	0	0	0
411	98 19 2	373	192	73644	107521	1.81771	1.06094	0.0734007	8	41	33	11.7835	2.67834	Landguard Formation	98 19	Landguard Formation	0	0	0	0
412	98 19 5	NA	NA	NA	NA	NA	0	0	2	16	14	9.40734	1.34391	Landguard Formation	98 19	Landguard Formation	0	0	0	0
413	98 2 1	428	182	75048	97592.4	2.41758	4.6799	0.340909	17	44	27	8.42381	5.30388	Landguard Formation	98 2	Landguard Formation	0	0	0	0
414	98 5 1	NA	NA	NA	NA	NA	0	0	24	52	28	10.2482	8.78413	Landguard Formation	98 5	Landguard Formation	0	0	0	0

## Sheet: repeat 4
Formation_name	Measurement_section_ID	Sample_ID	Shell_ID	INT_EXT	Image_ID	Colony_ID	Zooid_ID	Zooid_length_1	Zooid_width_1	Zooid_length_2	Zooid_width_2	Zooid_length_3	Zooid_width_3	Ovicell_length_1	Ovicell_width_1	Ovicell_length_2	Ovicell_width_2	Ovicell_length_3	Ovicell_width_3	Male_length_1	Male_width_1	Male_length_2	Male_width_2	Male_length_3	Male_width_3	Date	Person
Nukumaru Limestone	1	9.8	6	INT	NKLS_9.8_#6I_Col_11_a	11	2	NA	NA	NA	NA	NA	NA	198	209	192	215	206	204	NA	NA	NA	NA	NA	NA	20.02.2019	EDM
Nukumaru Limestone	2	9.8	6	INT	NKLS_9.8_#6I_Col_11_a	11	4	NA	NA	NA	NA	NA	NA	230	210	229	213	219	212	NA	NA	NA	NA	NA	NA	20.02.2019	EDM
Nukumaru Limestone	3	9.8	6	INT	NKLS_9.8_#6I_Col_11_a	11	1	NA	NA	NA	NA	NA	NA	224	216	206	215	209	215	NA	NA	NA	NA	NA	NA	20.02.2019	EDM
Nukumaru Limestone	4	9.8	6	INT	NKLS_9.8_#6I_Col_11_a	11	6	NA	NA	NA	NA	NA	NA	204	198	204	215	198	207	NA	NA	NA	NA	NA	NA	20.02.2019	EDM
Nukumaru Limestone	5	9.8	6	INT	NKLS_9.8_#6I_Col_11_a	11	7	NA	NA	NA	NA	NA	NA	197	203	191	206	193	207	NA	NA	NA	NA	NA	NA	20.02.2019	EDM
Nukumaru Limestone	6	9.8	6	INT	NKLS_9.8_#6I_Col_11_a	11	13	NA	NA	NA	NA	NA	NA	220	192	204	197	210	191	NA	NA	NA	NA	NA	NA	20.02.2019	EDM
Nukumaru Limestone	7	9.8	6	INT	NKLS_9.8_#6I_Col_11_a	11	10	NA	NA	NA	NA	NA	NA	220	196	212	195	218	188	NA	NA	NA	NA	NA	NA	20.02.2019	EDM
Nukumaru Limestone	8	9.8	6	INT	NKLS_9.8_#6I_Col_11_a	11	9	NA	NA	NA	NA	NA	NA	189	196	186	200	186	204	NA	NA	NA	NA	NA	NA	20.02.2019	EDM
Nukumaru Limestone	9	9.8	6	INT	NKLS_9.8_#6I_Col_11_a	11	15	NA	NA	NA	NA	NA	NA	174	174	182	191	185	184	NA	NA	NA	NA	NA	NA	20.02.2019	EDM
Nukumaru Limestone	10	9.8	6	INT	NKLS_9.8_#6I_Col_11_a	11	17	NA	NA	NA	NA	NA	NA	203	188	192	186	198	188	NA	NA	NA	NA	NA	NA	20.02.2019	EDM
Nukumaru Limestone	11	9.8	6	INT	NKLS_9.8_#6I_Col_11_a	11	18	NA	NA	NA	NA	NA	NA	198	214	200	219	195	213	NA	NA	NA	NA	NA	NA	20.02.2019	EDM
Nukumaru Limestone	12	9.8	6	INT	NKLS_9.8_#6I_Col_11_a	11	14	NA	NA	NA	NA	NA	NA	211	198	216	194	220	196	NA	NA	NA	NA	NA	NA	20.02.2019	EDM
Nukumaru Limestone	13	9.8	6	INT	NKLS_9.8_#6I_Col_11_a	11	16	NA	NA	NA	NA	NA	NA	218	188	216	190	221	200	NA	NA	NA	NA	NA	NA	20.02.2019	EDM
Nukumaru Limestone	20	9.8	8	INT	NKLS_9.8_#8I_Col_8_a	8	7	NA	NA	NA	NA	NA	NA	200	216	210	228	200	228	NA	NA	NA	NA	NA	NA	20.02.2019	EDM
Nukumaru Limestone	21	9.8	8	INT	NKLS_9.8_#8I_Col_8_a	8	1	NA	NA	NA	NA	NA	NA	155	225	159	236	160	242	NA	NA	NA	NA	NA	NA	20.02.2019	EDM
Nukumaru Limestone	22	9.8	8	INT	NKLS_9.8_#8I_Col_8_a	8	2	NA	NA	NA	NA	NA	NA	170	206	175	212	175	209	NA	NA	NA	NA	NA	NA	20.02.2019	EDM
Nukumaru Limestone	23	9.8	8	INT	NKLS_9.8_#8I_Col_8_a	8	3	NA	NA	NA	NA	NA	NA	139	222	144	237	141	228	NA	NA	NA	NA	NA	NA	20.02.2019	EDM
Nukumaru Limestone	24	9.8	8	INT	NKLS_9.8_#8I_Col_8_a	8	6	NA	NA	NA	NA	NA	NA	167	239	168	261	170	240	NA	NA	NA	NA	NA	NA	20.02.2019	EDM
Nukumaru Limestone	25	9.8	8	INT	NKLS_9.8_#8I_Col_8_a	8	8	NA	NA	NA	NA	NA	NA	172	205	178	219	173	217	NA	NA	NA	NA	NA	NA	20.02.2019	EDM
Nukumaru Limestone	26	9.8	8	INT	NKLS_9.8_#8I_Col_8_a	8	22	335	166	333	169	338	160	NA	NA	NA	NA	NA	NA	NA	NA	NA	NA	NA	NA	20.02.2019	EDM
Nukumaru Limestone	27	9.8	8	INT	NKLS_9.8_#8I_Col_8_a	8	16	337	143	340	144	344	140	NA	NA	NA	NA	NA	NA	NA	NA	NA	NA	NA	NA	20.02.2019	EDM
Nukumaru Limestone	28	9.8	8	INT	NKLS_9.8_#8I_Col_8_a	8	17	417	161	417	153	413	165	NA	NA	NA	NA	NA	NA	NA	NA	NA	NA	NA	NA	20.02.2019	EDM
Nukumaru Limestone	29	9.8	8	INT	NKLS_9.8_#8I_Col_8_a	8	18	366	141	378	149	371	149	NA	NA	NA	NA	NA	NA	NA	NA	NA	NA	NA	NA	20.02.2019	EDM
Nukumaru Limestone	30	9.8	8	INT	NKLS_9.8_#8I_Col_8_a	8	11	368	149	391	150	398	144	NA	NA	NA	NA	NA	NA	NA	NA	NA	NA	NA	NA	20.02.2019	EDM
Nukumaru Limestone	32	9.8	15	INT	NKLS_9.8_#15I_Col_9_a	9	24	449	146	445	154	465	140	NA	NA	NA	NA	NA	NA	NA	NA	NA	NA	NA	NA	20.02.2019	EDM
Nukumaru Limestone	33	9.8	15	INT	NKLS_9.8_#15I_Col_9_a	9	29	410	155	424	154	428	154	NA	NA	NA	NA	NA	NA	NA	NA	NA	NA	NA	NA	20.02.2019	EDM
Nukumaru Limestone	36	9.8	15	INT	NKLS_9.8_#15I_Col_9_a	9	36	352	185	351	194	358	174	NA	NA	NA	NA	NA	NA	NA	NA	NA	NA	NA	NA	20.02.2019	EDM
Nukumaru Limestone	37	9.8	15	INT	NKLS_9.8_#15I_Col_9_a	9	20	376	170	394	176	393	174	NA	NA	NA	NA	NA	NA	NA	NA	NA	NA	NA	NA	20.02.2019	EDM
Nukumaru Limestone	38	9.8	15	INT	NKLS_9.8_#15I_Col_9_a	9	31	364	180	390	192	375	182	NA	NA	NA	NA	NA	NA	NA	NA	NA	NA	NA	NA	20.02.2019	EDM
Nukumaru Limestone	40	9.8	15	INT	NKLS_9.8_#15I_Col_9_a	9	25	385	169	404	168	401	162	NA	NA	NA	NA	NA	NA	NA	NA	NA	NA	NA	NA	20.02.2019	EDM
Nukumaru Limestone	41	9.8	15	INT	NKLS_9.8_#15I_Col_9_b	9	1	NA	NA	NA	NA	NA	NA	176	218	181	218	178	216	NA	NA	NA	NA	NA	NA	20.02.2019	EDM
Nukumaru Limestone	42	9.8	15	INT	NKLS_9.8_#15I_Col_9_b	9	5	NA	NA	NA	NA	NA	NA	206	234	201	246	193	235	NA	NA	NA	NA	NA	NA	20.02.2019	EDM
Nukumaru Limestone	43	9.8	15	INT	NKLS_9.8_#15I_Col_9_b	9	3	NA	NA	NA	NA	NA	NA	180	243	178	245	182	235	NA	NA	NA	NA	NA	NA	20.02.2019	EDM
Nukumaru Limestone	44	9.8	15	INT	NKLS_9.8_#15I_Col_9_b	9	2	NA	NA	NA	NA	NA	NA	221	241	221	239	216	232	NA	NA	NA	NA	NA	NA	20.02.2019	EDM
Nukumaru Limestone	45	9.8	15	INT	NKLS_9.8_#15I_Col_9_b	9	4	NA	NA	NA	NA	NA	NA	220	212	212	214	213	218	NA	NA	NA	NA	NA	NA	20.02.2019	EDM
Nukumaru Limestone	46	9.8	15	INT	NKLS_9.8_#15I_Col_9_b	9	27	388	166	388	181	390	166	NA	NA	NA	NA	NA	NA	NA	NA	NA	NA	NA	NA	20.02.2019	EDM
Nukumaru Limestone	47	9.8	15	INT	NKLS_9.8_#15I_Col_9_b	9	29	426	158	414	156	407	158	NA	NA	NA	NA	NA	NA	NA	NA	NA	NA	NA	NA	20.02.2019	EDM
Nukumaru Limestone	48	9.8	15	INT	NKLS_9.8_#15I_Col_9_b	9	25	406	172	401	167	403	169	NA	NA	NA	NA	NA	NA	NA	NA	NA	NA	NA	NA	20.02.2019	EDM
Nukumaru Limestone	49	9.8	15	INT	NKLS_9.8_#15I_Col_9_b	9	45	363	175	366	176	367	170	NA	NA	NA	NA	NA	NA	NA	NA	NA	NA	NA	NA	20.02.2019	EDM
Nukumaru Limestone	54	9.8	16	EXT	NKLS_9.8_#16E_Col_1_a	1	2	NA	NA	NA	NA	NA	NA	167	194	174	200	168	198	NA	NA	NA	NA	NA	NA	21.02.2019	EDM
Nukumaru Limestone	55	9.8	16	EXT	NKLS_9.8_#16E_Col_1_a	1	1	NA	NA	NA	NA	NA	NA	203	255	190	236	198	240	NA	NA	NA	NA	NA	NA	21.02.2019	EDM
Nukumaru Limestone	56	9.8	16	EXT	NKLS_9.8_#16E_Col_1_a	1	13	NA	NA	NA	NA	NA	NA	187	215	185	215	184	205	NA	NA	NA	NA	NA	NA	21.02.2019	EDM
Nukumaru Limestone	57	9.8	16	EXT	NKLS_9.8_#16E_Col_1_a	1	12	NA	NA	NA	NA	NA	NA	195	185	191	185	190	193	NA	NA	NA	NA	NA	NA	21.02.2019	EDM
Nukumaru Limestone	58	9.8	16	EXT	NKLS_9.8_#16E_Col_1_a	1	3	NA	NA	NA	NA	NA	NA	200	214	199	213	200	217	NA	NA	NA	NA	NA	NA	21.02.2019	EDM
Nukumaru Limestone	59	9.8	16	EXT	NKLS_9.8_#16E_Col_1_a	1	8	NA	NA	NA	NA	NA	NA	178	217	176	220	176	225	NA	NA	NA	NA	NA	NA	21.02.2019	EDM
Nukumaru Limestone	61	9.8	16	EXT	NKLS_9.8_#16E_Col_1_a	1	49	347	135	347	146	350	136	NA	NA	NA	NA	NA	NA	NA	NA	NA	NA	NA	NA	21.02.2019	EDM
Nukumaru Limestone	63	9.8	16	EXT	NKLS_9.8_#16E_Col_1_a	1	53	343	171	350	162	341	169	NA	NA	NA	NA	NA	NA	NA	NA	NA	NA	NA	NA	21.02.2019	EDM
Nukumaru Limestone	65	9.8	16	EXT	NKLS_9.8_#16E_Col_1_a	1	46	364	153	360	166	369	155	NA	NA	NA	NA	NA	NA	NA	NA	NA	NA	NA	NA	21.02.2019	EDM
Nukumaru Limestone	66	9.8	16	EXT	NKLS_9.8_#16E_Col_1_a	1	55	310	142	325	145	313	141	NA	NA	NA	NA	NA	NA	NA	NA	NA	NA	NA	NA	21.02.2019	EDM
Nukumaru Limestone	67	9.8	16	EXT	NKLS_9.8_#16E_Col_1_a	1	36	369	144	366	149	365	152	NA	NA	NA	NA	NA	NA	NA	NA	NA	NA	NA	NA	21.02.2019	EDM
Nukumaru Limestone	68	9.8	16	EXT	NKLS_9.8_#16E_Col_1_a	1	45	370	128	382	132	366	133	NA	NA	NA	NA	NA	NA	NA	NA	NA	NA	NA	NA	21.02.2019	EDM
Nukumaru Limestone	70	9.8	18	EXT	NKLS_9.8_#18E_Col_1_a	1	29	365	165	362	165	362	155	NA	NA	NA	NA	NA	NA	NA	NA	NA	NA	NA	NA	21.02.2019	EDM
Nukumaru Limestone	72	9.8	18	EXT	NKLS_9.8_#18E_Col_1_a	1	6	375	161	373	158	384	162	NA	NA	NA	NA	NA	NA	NA	NA	NA	NA	NA	NA	21.02.2019	EDM
Nukumaru Limestone	73	9.8	18	EXT	NKLS_9.8_#18E_Col_1_a	1	38	367	165	368	167	374	167	NA	NA	NA	NA	NA	NA	NA	NA	NA	NA	NA	NA	21.02.2019	EDM
Nukumaru Limestone	74	9.8	18	EXT	NKLS_9.8_#18E_Col_1_a	1	34	402	172	404	174	396	171	NA	NA	NA	NA	NA	NA	NA	NA	NA	NA	NA	NA	21.02.2019	EDM
Nukumaru Limestone	75	9.8	18	EXT	NKLS_9.8_#18E_Col_1_a	1	35	447	171	438	169	443	166	NA	NA	NA	NA	NA	NA	NA	NA	NA	NA	NA	NA	21.02.2019	EDM
Nukumaru Limestone	76	9.8	18	EXT	NKLS_9.8_#18E_Col_1_a	1	28	369	164	369	158	367	165	NA	NA	NA	NA	NA	NA	NA	NA	NA	NA	NA	NA	21.02.2019	EDM
Nukumaru Limestone	77	9.8	18	INT	NKLS_9.8_#18I_Col_1_a	1	2	NA	NA	NA	NA	NA	NA	159	238	152	228	156	230	NA	NA	NA	NA	NA	NA	21.02.2019	EDM
Nukumaru Limestone	78	9.8	18	INT	NKLS_9.8_#18I_Col_1_a	1	1	NA	NA	NA	NA	NA	NA	188	236	181	228	182	225	NA	NA	NA	NA	NA	NA	21.02.2019	EDM
Nukumaru Limestone	79	9.8	18	INT	NKLS_9.8_#18I_Col_1_a	1	6	NA	NA	NA	NA	NA	NA	155	236	145	232	156	225	NA	NA	NA	NA	NA	NA	21.02.2019	EDM
Nukumaru Limestone	86	9.8	18	INT	NKLS_9.8_#18I_Col_1_b	1	4	NA	NA	NA	NA	NA	NA	208	231	206	228	203	234	NA	NA	NA	NA	NA	NA	21.02.2019	EDM
Nukumaru Limestone	87	9.8	18	INT	NKLS_9.8_#18I_Col_1_b	1	3	NA	NA	NA	NA	NA	NA	180	228	186	226	183	218	NA	NA	NA	NA	NA	NA	21.02.2019	EDM
Nukumaru Limestone	88	9.8	18	INT	NKLS_9.8_#18I_Col_1_b	1	6	NA	NA	NA	NA	NA	NA	177	227	185	228	183	222	NA	NA	NA	NA	NA	NA	21.02.2019	EDM
Nukumaru Limestone	89	9.8	18	INT	NKLS_9.8_#18I_Col_1_b	1	7	NA	NA	NA	NA	NA	NA	175	203	175	206	168	210	NA	NA	NA	NA	NA	NA	21.02.2019	EDM
Nukumaru Limestone	90	9.8	18	INT	NKLS_9.8_#18I_Col_1_b	1	8	NA	NA	NA	NA	NA	NA	171	242	173	236	168	239	NA	NA	NA	NA	NA	NA	21.02.2019	EDM
Nukumaru Limestone	91	9.8	18	INT	NKLS_9.8_#18I_Col_1_b	1	9	NA	NA	NA	NA	NA	NA	185	242	187	226	190	232	NA	NA	NA	NA	NA	NA	21.02.2019	EDM
Nukumaru Limestone	92	9.8	18	INT	NKLS_9.8_#18I_Col_1_b	1	10	NA	NA	NA	NA	NA	NA	168	218	165	230	170	231	NA	NA	NA	NA	NA	NA	21.02.2019	EDM
Nukumaru Limestone	93	9.8	18	INT	NKLS_9.8_#18I_Col_1_b	1	11	NA	NA	NA	NA	NA	NA	178	266	178	260	178	258	NA	NA	NA	NA	NA	NA	21.02.2019	EDM
Nukumaru Limestone	94	9.8	18	INT	NKLS_9.8_#18I_Col_1_b	1	13	NA	NA	NA	NA	NA	NA	159	219	163	222	156	211	NA	NA	NA	NA	NA	NA	21.02.2019	EDM
Nukumaru Limestone	95	9.8	18	INT	NKLS_9.8_#18I_Col_1_b	1	44	405	173	408	171	403	167	NA	NA	NA	NA	NA	NA	NA	NA	NA	NA	NA	NA	21.02.2019	EDM
Nukumaru Limestone	96	9.8	18	INT	NKLS_9.8_#18I_Col_1_b	1	43	376	167	389	169	374	161	NA	NA	NA	NA	NA	NA	NA	NA	NA	NA	NA	NA	21.02.2019	EDM
Nukumaru Limestone	103	9.8	18	INT	NKLS_9.8_#18I_Col_4_a	4	3	NA	NA	NA	NA	NA	NA	173	229	186	239	171	235	NA	NA	NA	NA	NA	NA	21.02.2019	EDM
Nukumaru Limestone	104	9.8	18	INT	NKLS_9.8_#18I_Col_4_a	4	1	NA	NA	NA	NA	NA	NA	185	256	188	255	187	261	NA	NA	NA	NA	NA	NA	21.02.2019	EDM
Nukumaru Limestone	105	9.8	18	INT	NKLS_9.8_#18I_Col_4_a	4	8	NA	NA	NA	NA	NA	NA	184	232	181	234	178	244	NA	NA	NA	NA	NA	NA	21.02.2019	EDM
Nukumaru Limestone	106	9.8	18	INT	NKLS_9.8_#18I_Col_4_a	4	5	NA	NA	NA	NA	NA	NA	175	234	178	240	176	236	NA	NA	NA	NA	NA	NA	21.02.2019	EDM
Nukumaru Limestone	107	9.8	18	INT	NKLS_9.8_#18I_Col_4_a	4	10	NA	NA	NA	NA	NA	NA	211	240	203	248	203	237	NA	NA	NA	NA	NA	NA	21.02.2019	EDM
Nukumaru Limestone	108	9.8	18	INT	NKLS_9.8_#18I_Col_4_a	4	9	NA	NA	NA	NA	NA	NA	184	229	186	228	189	236	NA	NA	NA	NA	NA	NA	21.02.2019	EDM
Nukumaru Limestone	109	9.8	18	INT	NKLS_9.8_#18I_Col_4_a	4	11	NA	NA	NA	NA	NA	NA	157	218	156	216	158	220	NA	NA	NA	NA	NA	NA	21.02.2019	EDM
Nukumaru Limestone	110	9.8	18	INT	NKLS_9.8_#18I_Col_4_a	4	14	NA	NA	NA	NA	NA	NA	192	236	192	235	191	239	NA	NA	NA	NA	NA	NA	21.02.2019	EDM
Nukumaru Limestone	111	9.8	18	INT	NKLS_9.8_#18I_Col_4_a	4	13	NA	NA	NA	NA	NA	NA	195	226	189	233	204	234	NA	NA	NA	NA	NA	NA	21.02.2019	EDM
Nukumaru Limestone	112	9.8	18	INT	NKLS_9.8_#18I_Col_4_a	4	12	NA	NA	NA	NA	NA	NA	184	226	200	236	182	233	NA	NA	NA	NA	NA	NA	21.02.2019	EDM
Nukumaru Limestone	113	9.8	18	INT	NKLS_9.8_#18I_Col_4_a	4	15	NA	NA	NA	NA	NA	NA	162	213	173	204	168	216	NA	NA	NA	NA	NA	NA	21.02.2019	EDM
Nukumaru Limestone	117	9.8	18	INT	NKLS_9.8_#18I_Col_4_b	4	2	NA	NA	NA	NA	NA	NA	185	212	181	204	182	216	NA	NA	NA	NA	NA	NA	21.02.2019	EDM
Nukumaru Limestone	118	9.8	18	INT	NKLS_9.8_#18I_Col_4_b	4	1	NA	NA	NA	NA	NA	NA	184	234	178	228	184	234	NA	NA	NA	NA	NA	NA	21.02.2019	EDM
Nukumaru Limestone	119	9.8	18	INT	NKLS_9.8_#18I_Col_4_b	4	13	NA	NA	NA	NA	NA	NA	171	230	168	226	174	224	NA	NA	NA	NA	NA	NA	21.02.2019	EDM
Nukumaru Limestone	120	9.8	18	INT	NKLS_9.8_#18I_Col_4_b	4	12	NA	NA	NA	NA	NA	NA	175	226	172	226	170	224	NA	NA	NA	NA	NA	NA	21.02.2019	EDM
Nukumaru Limestone	121	9.8	18	INT	NKLS_9.8_#18I_Col_4_b	4	31	375	167	365	166	379	162	NA	NA	NA	NA	NA	NA	NA	NA	NA	NA	NA	NA	21.02.2019	EDM
Nukumaru Limestone	122	9.8	18	INT	NKLS_9.8_#18I_Col_4_b	4	32	406	171	398	165	406	171	NA	NA	NA	NA	NA	NA	NA	NA	NA	NA	NA	NA	21.02.2019	EDM
Nukumaru Limestone	123	9.8	18	INT	NKLS_9.8_#18I_Col_4_b	4	30	359	157	359	164	365	156	NA	NA	NA	NA	NA	NA	NA	NA	NA	NA	NA	NA	21.02.2019	EDM
Nukumaru Limestone	124	9.8	18	INT	NKLS_9.8_#18I_Col_4_b	4	53	380	193	388	194	382	192	NA	NA	NA	NA	NA	NA	NA	NA	NA	NA	NA	NA	21.02.2019	EDM
Nukumaru Limestone	125	9.8	18	INT	NKLS_9.8_#18I_Col_4_b	4	19	360	198	355	195	359	193	NA	NA	NA	NA	NA	NA	NA	NA	NA	NA	NA	NA	21.02.2019	EDM
Nukumaru Limestone	126	9.8	20	INT	NKLS_9.8_#20I_Col_1_a	1	1	NA	NA	NA	NA	NA	NA	175	232	183	226	171	222	NA	NA	NA	NA	NA	NA	21.02.2019	EDM
Nukumaru Limestone	128	9.8	20	INT	NKLS_9.8_#20I_Col_2_a	2	59	325	177	331	176	328	182	NA	NA	NA	NA	NA	NA	NA	NA	NA	NA	NA	NA	21.02.2019	EDM
Nukumaru Limestone	132	9.8	20	INT	NKLS_9.8_#20I_Col_2_a	2	48	442	193	445	186	446	191	NA	NA	NA	NA	NA	NA	NA	NA	NA	NA	NA	NA	21.02.2019	EDM
Nukumaru Limestone	133	9.8	20	INT	NKLS_9.8_#20I_Col_2_a	2	49	366	183	366	185	365	187	NA	NA	NA	NA	NA	NA	NA	NA	NA	NA	NA	NA	21.02.2019	EDM
[truncated: 1,150 more rows]
